# Supplementary material for: Transcriptome Analysis of the Hierarchical Response of Histone Deacetylase Proteins That Respond in an Antagonistic Manner to Salinity Stress
Source: Front Plant Sci. 2019 Oct 18;10:1323. doi: 10.3389/fpls.2019.01323 (PMC6813852; doi:10.3389/fpls.2019.01323)
Supplement: Supplementary file 2 [file Table_1.xlsx]

## Sheet: S1
Supplementary table S1. Scores of RT-qPCR and ABA content for statistics analysis
means (Average; n≧3)±SD
Figure 1A
non NaCl treatment (n=3)
	Survival rate
Col-0	100 ± 0
hda19-3	90 ± 8.2
quad	100 ± 0
quint	93.3 ± 9.4
100mM NaCl treatment (n=3)
	Survival rate
Col-0	16.7 ± 4.7
hda19-3	90 ± 8.2
quad	0 ± 0
quint	90 ± 14.1
Figure 2A
non NaCl treatment (n=3)
	ABI5	ABA2	NCED4
Col-0	0.12 ± 0.00	0.33 ± 0.02	0.015 ± 0.002
hda19-3	0.35 ± 0.07	0.45 ± 0.04	0.027 ± 0.006
quad	0.09 ± 0.01	0.36 ± 001	0.017 ± 0.005
quint	0.24 ± 0.04	0.48 ± 003	0.035 ± 0.004
125mM NaCl treatment (n=3)
	ABI5	ABA2	NCED4
Col-0	0.26 ± 0.05	0.31 ± 0.03	0.024 ± 0.005
hda19-3	0.9 ± 0.21	0.38 ± 0.02	0.033 ± 0.011
quad	0.17 ± 0.01	032 ± 0.03	0.026 ± 0.009
quint	0.74 ± 0.11	0.37 ±0.04	0.041 ± 0.007
Figure 2C
non NaCl treatment (n=4)
	ABA content (pg/mgDW)
Col-0	5.86 ± 0.26
hda19-3	8.54 ± 0.83
quad	4.23 ± 0.13
quint	7.52 ± 0.49
125mM NaCl treatment (n=4)
	ABA content (pg/mgDW)
Col-0	71.37 ± 0.08
hda19-3	97.97 ± 11.24
quad	46.17 ± 4.80
quint	94.32 ± 25.54
Figure 2D
non NaCl treatment (n=3)
	Proline (ng/mg FW)
Col-0	32.1 ± 1.4
hda19-3	25.0 ± 0.4
quad	37.3 ± 3.7
quint	26.6 ± 4.1
125mM NaCl treatment (n=3)
	Proline (ng/mg FW)
Col-0	76.4 ± 5.6
hda19-3	51.5 ± 3.5
quad	81.6 ± 1.8
quint	48.0 ± 5.3
Figure 3C
non NaCl treatment (n=3)
	GA2ox7	GA 20ox1	UGT73C5
Col-0	0.014 ± 0.003	0.016 ± 0.003	0.50 ± 0.24
hda19-3	0.002 ± 0.001	0.031 ± 0.005	1.00 ± 0.49
quad	0.021 ± 0.004	0.015 ± 0.003	0.68 ± 0.37
quint	0.002 ± 0.001	0.026 ± 0.004	0.75 ± 0.40
125mM NaCl treatment (n=3)
	GA2ox7	GA 20ox1	UGT73C5
Col-0	0.12 ± 0.02	0.021 ± 0.005	0.53 ± 0.14
hda19-3	0.03 ± 0.01	0.016 ± 0.004	1.32 ± 0.16
quad	0.12 ± 0.01	0.022 ± 0.003	0.58 ± 0.16
quint	0.02 ± 0.01	0.020 ± 0.008	1.64 ± 0.40
Figure 4A
non NaCl treatment (n=3)
	NAC016	IDD7
Col-0	0.31 ± 0.08	1.14 ± 0.01
hda19-3	0.55 ± 0.05	0.97 ± 0.13
quad	2.03 ± 0.65	1.21 ± 0.10
quint	2.15 ± 0.21	1.08 ± 0.23
125mM NaCl treatment
	NAC016	IDD7
Col-0	0.65 ± 0.15	1.14 ± 0.36
hda19-3	0.89 ± 0.18	0.54 ± 0.15
quad	2.77 ± 0.38	2.21 ± 0.14
quint	3.01 ± 0.15	0.68 ± 0.15

## Sheet: S2
Supplementary table S2. Primers for RT-qPCR
Gene	AGI	Forward primer	Reverse primer
ABI5	AT2G36270	5’-CCGGTGTCTTCAGATGGATTAG-3’	5’-TCCTCTGTCTTCTCTCCACTAC-3’
NAC016	AT1G34180	5’-GACACCTGAGAACCAGCTTAATA-3’	5’-GAGAGCAGCCTGATCATCTTT-3’
NCED4	AT4G19170	5’-TACATCCGTAACGGTCCAAATC-3’	5’-CTGCTACAGAGAGTGGCTTTAC-3’
ABA2	AT1G52340	5’-GAGGCACTACATCGAGGAATAAG-3’	5’-GCCTTTGACTAGGAAGAGAAGAA-3’
GA 2ox7	AT1G50960	5’-CGGAAGCGTTTCACATCATTC-3’	5’-CTCGAGCTATCTCTTGCACATAC-3’
GA 20ox1	AT4G25420	5’-GCATCAGCGAGGAGCTTATT-3’	5’-CCAACACTCTCACCGGATTT-3’
UGT73C5	AT2G36800	5’-AACTCAAGGAGCTGGGACTA-3’	5’-CCGAGAACCACTCAACTAACTC-3’
MON1	AT2G28390	5’-CCGATGACTTGCTTCTACTCTC-3’	5’-CTGAGCGTTGTATCTTGGTAGG-3’

## Sheet: S3
Supplemental Table S3. Genes classified into Group 1 in Figure 1C
AGI code	Col-0	Col-0 NaCl	hda19	hda19 NaCl	quad	quad NaCl	quint	quint NaCl	one-way ANOVA	BH FDR	function	annotation
AT1G01010	7.54311	8.47257	8.18606	9.32935	7.99834	9.17819	8.48314	9.60916	8.65487e-13	5.20543e-05	protein_coding	NAC domain containing protein 1
AT1G01120	12.1703	12.4775	11.8466	13.5006	12.2748	12.5154	12.4745	13.6108	1.49528e-13	6.77514e-06	protein_coding	3-ketoacyl-CoA synthase 1
AT1G01140	10.4062	10.8011	10.8031	11.57	10.5982	10.9379	10.7993	11.7333	1.33958e-11	2.54773e-05	protein_coding	CBL-interacting protein kinase 9
AT1G01240	8.62732	10.0254	9.58567	11.298	8.56115	9.61989	9.41224	11.7257	1.58862e-08	6.18342e-05	protein_coding
AT1G01355	5.12185	5.21909	5.52035	5.66082	5.24053	5.13553	5.54526	6.15584	2.26059e-16	2.80406e-11	protein_coding	Putative endonuclease or glycosyl hydrolase
AT1G02205	8.33129	10.2109	8.48013	11.9122	7.87432	9.26322	8.40644	12.069	5.93828e-09	0.0100121	protein_coding	Fatty acid hydroxylase superfamily
AT1G02220	9.71527	10.6413	10.7394	11.7337	10.0504	10.8128	10.804	11.6765	6.08047e-15	2.51517e-06	protein_coding	NAC domain containing protein 3
AT1G02250	9.81976	10.8664	10.9686	12.1703	10.426	11.2883	11.0698	12.0193	4.22677e-05	0.0334576	protein_coding	NAC domain containing protein 5
AT1G02340	7.13644	7.50697	7.71234	8.76431	7.84576	8.02941	7.69348	8.88865	5.1035e-07	2.90265e-06	protein_coding	basic helix-loop-helix (bHLH) DNA-binding superfamily protein
AT1G02390	7.3142	7.49074	7.30178	8.96213	7.30208	8.72209	7.084	9.16943	0.656315	5.85235e-09	protein_coding	glycerol-3-phosphate acyltransferase 2
AT1G02700	5.10862	6.64778	5.55181	7.08721	5.46677	6.13942	5.89524	6.51472	0.000305624	1.07856e-07	protein_coding
AT1G02850	11.2016	11.8967	11.2484	12.6978	11.4207	11.9348	11.1308	12.7883	0.435789	5.66181e-07	protein_coding	beta glucosidase 11
AT1G03020	5.54809	6.33346	5.90524	6.59178	5.92839	6.3568	6.57818	7.09336	0.204029	0.00238161	protein_coding	Thioredoxin superfamily protein
AT1G03090	5.2628	5.84388	5.35302	6.48875	5.56255	6.05963	5.26128	6.74142	0.000520896	0.00471074	protein_coding	methylcrotonyl-CoA carboxylase alpha chain, mitochondrial / 3-methylcrotonyl-CoA carboxylase 1 (MCCA)
AT1G03120	5.81275	6.02815	6.55538	7.36146	5.50566	5.722	6.12313	6.98616	0.274585	0.0467297	protein_coding	responsive to abscisic acid 28
AT1G03220	13.747	14.2501	15.0448	15.7347	13.7579	14.3677	14.4951	15.277	0.290709	0.00155029	protein_coding	Eukaryotic aspartyl protease family protein
AT1G03790	6.0817	9.60579	8.02424	12.5292	6.40947	9.16504	7.74902	12.6206	3.50323e-05	1.40997e-05	protein_coding	Zinc finger C-x8-C-x5-C-x3-H type family protein
AT1G03850	10.1294	11.2813	11.6378	11.526	10.2144	11.783	10.9275	11.6941	3.3506e-12	4.42496e-08	protein_coding	Glutaredoxin family protein
AT1G03940	8.38685	8.72827	9.00176	10.0856	8.41582	8.96279	8.07492	9.08731	1.4912e-07	1.34653e-07	protein_coding	HXXXD-type acyl-transferase family protein
AT1G04560	4.81062	7.50928	7.76454	9.91918	5.50359	6.43479	6.94358	8.15665	0.000147346	6.1087e-09	protein_coding	AWPM-19-like family protein
AT1G04990	9.43264	10.1641	9.93034	10.7499	9.15805	9.80837	9.67712	10.7399	0.35715	0.000494676	protein_coding	Zinc finger C-x8-C-x5-C-x3-H type family protein
AT1G05400	7.40281	7.89013	8.33044	9.1435	7.77463	8.34819	8.68936	9.51355	0.0623205	1.44752e-08	protein_coding
AT1G05510	5.08079	4.99811	6.95505	8.17779	5.43933	5.70692	6.57464	7.26948	9.49211e-05	7.95702e-10	protein_coding	Protein of unknown function (DUF1264)
AT1G05530	5.7614	5.94033	6.07781	6.67696	5.92318	6.17921	5.99692	7.12704	0.00598015	6.56528e-08	protein_coding	UDP-glucosyl transferase 75B2
AT1G05560	10.3672	12.0658	11.1098	13.2104	10.645	12.3495	11.1532	13.9257	0.0010798	0.000889181	protein_coding	UDP-glucosyltransferase 75B1
AT1G05650	6.28309	5.8473	6.80876	7.40916	6.38965	6.64441	6.66973	7.24313	3.08343e-11	3.36306e-09	protein_coding	Pectin lyase-like superfamily protein
AT1G05680	9.39052	11.3513	9.70516	13.2438	8.36014	11.2285	9.24031	13.2841	0.0111215	0.000771139	protein_coding	Uridine diphosphate glycosyltransferase 74E2
AT1G05690	7.03592	7.67338	7.50498	8.54596	7.36002	8.02406	7.72975	9.07302	4.28489e-06	4.17457e-09	protein_coding	BTB and TAZ domain protein 3
AT1G06570	11.3444	12.6335	11.3712	13.1649	11.1995	12.3504	11.3788	13.3485	0.00747256	0.00034724	protein_coding	phytoene desaturation 1
AT1G07040	8.65816	9.25454	9.10273	10.3776	8.90728	9.29773	9.2135	10.2617	8.80824e-05	1.67251e-07	protein_coding
AT1G07080	8.8411	9.50145	9.23161	10.0202	8.8561	9.46725	9.1548	10.0915	1.79907e-05	4.71734e-06	protein_coding	Thioredoxin superfamily protein
AT1G07380	11.0125	11.3926	11.5469	11.93	11.4596	11.8084	11.8457	12.2521	4.05314e-05	0.00832198	protein_coding	Neutral/alkaline non-lysosomal ceramidase
AT1G07900	6.38785	7.51305	6.65626	8.07078	6.42871	7.9311	7.24008	8.74047	0.444028	1.03664e-06	protein_coding	LOB domain-containing protein 1
AT1G07985	7.55757	10.3933	9.31527	11.9681	7.33637	9.67728	8.77953	12.1734	1.00507e-14	0.0140109	protein_coding	Expressed protein
AT1G08570	12.0472	13.3405	12.556	13.8706	11.8716	13.2799	12.5731	14.5002	4.13001e-07	2.67838e-06	protein_coding	atypical CYS HIS rich thioredoxin 4
AT1G08630	6.30886	7.88856	6.86163	8.76306	6.00982	7.58402	6.4124	8.63906	2.37814e-10	3.36217e-10	protein_coding	threonine aldolase 1
AT1G08890	8.03704	8.63509	8.25009	9.60935	7.99493	8.45673	8.13631	9.62943	0.151303	5.43228e-07	protein_coding	Major facilitator superfamily protein
AT1G08920	10.335	12.0583	10.9034	12.8551	10.161	11.5207	10.3746	12.3968	6.24411e-12	3.692e-12	protein_coding	ERD (early response to dehydration) six-like 1
AT1G09500	7.91834	8.07674	8.00049	9.51311	6.69534	6.94639	7.73751	10.1417	2.07784e-10	9.38056e-10	protein_coding	NAD(P)-binding Rossmann-fold superfamily protein
AT1G09960	10.0823	10.8131	10.2325	11.0292	10.0887	10.6505	10.1282	11.1747	0.153396	0.00133609	protein_coding	sucrose transporter 4
AT1G10070	5.45345	5.93263	5.5226	6.51414	5.44879	5.76244	5.90661	6.53343	0.0096381	8.30423e-07	protein_coding	branched-chain amino acid transaminase 2
AT1G10560	8.62477	9.47051	8.82329	9.95177	8.55527	9.67082	8.71149	10.1198	2.13753e-08	2.20016e-07	protein_coding	plant U-box 18
AT1G10740	11.0032	11.3068	11.1421	11.9275	11.2459	11.3945	11.3415	12.3675	1.21657e-08	1.36493e-06	protein_coding	alpha/beta-Hydrolases superfamily protein
AT1G11170	7.41889	7.83224	7.88811	8.70318	7.31905	7.75265	7.72705	8.50553	3.48841e-08	7.34427e-06	protein_coding	Protein of unknown function (DUF707)
AT1G11175	9.30125	10.0891	9.67615	10.5367	9.55628	10.3179	9.83423	11.0743	7.14426e-08	5.02875e-07	other_rna	other RNA
AT1G11910	9.91046	10.3239	10.111	10.7677	10.2477	10.7421	10.4293	10.9223	0.0234862	1.777e-09	protein_coding	aspartic proteinase A1
AT1G11920	5.295	5.0889	5.22508	6.08913	5.48308	5.6423	5.56608	5.75664	0.550619	1.2609e-07	protein_coding	Pectin lyase-like superfamily protein
AT1G13360	11.7405	12.1874	12.444	12.9468	11.816	12.3112	12.4951	13.1922	6.23674e-08	5.75363e-07	protein_coding
AT1G13390	9.07824	9.63508	9.46532	9.81292	9.2628	9.702	9.61356	10.0829	1.29864e-05	3.01637e-05	protein_coding
AT1G13930	16.6255	17.1051	17.3502	17.6708	16.4513	16.8466	17.399	17.7448	0.213966	1.43698e-05	protein_coding
AT1G13960	10.4683	10.8231	10.9565	11.4351	10.7414	10.9581	10.9369	11.523	3.82473e-06	0.0136357	protein_coding	WRKY DNA-binding protein 4
AT1G13990	10.2745	11.2936	10.9537	12.6803	10.7345	11.595	11.3277	13.1475	0.0306878	0.00422809	protein_coding
AT1G14370	10.4357	11.3837	11.0142	11.8922	10.9089	11.7072	11.0906	12.0323	2.29834e-08	0.0243246	protein_coding	protein kinase 2A
AT1G14530	7.85618	8.21155	8.19777	8.83444	7.82493	8.3313	8.24196	8.84893	0.000238021	0.00770093	protein_coding	Protein of unknown function (DUF1084)
AT1G14860	9.56494	10.1691	10.4072	10.4831	9.91595	9.93642	10.0073	10.7193	1.59819e-10	1.61776e-08	protein_coding	nudix hydrolase homolog 18
AT1G15040	7.47362	8.86054	8.20105	9.35236	7.71956	8.3738	8.57521	8.82415	2.67109e-08	0.000102619	protein_coding	Class I glutamine amidotransferase-like superfamily protein
AT1G15330	5.685	6.58716	7.74534	10.3511	5.48264	6.60109	6.61402	10.1019	0.0084948	0.00167059	protein_coding	Cystathionine beta-synthase (CBS) protein
AT1G15415	6.55643	7.12213	6.16325	7.31118	6.12004	6.42995	6.18994	7.43533	0.563966	0.00378053	protein_coding
AT1G15800	9.56793	9.85131	9.75609	10.4087	9.34878	9.85951	9.7352	10.8601	0.0546348	9.79889e-08	protein_coding
AT1G16515	8.70053	9.34377	8.89295	9.82534	8.7115	9.66811	8.53147	10.4001	0.505603	1.06055e-05	protein_coding
AT1G16720	8.17122	8.27855	8.19307	8.59073	7.99097	8.39907	8.48403	8.99902	0.00205529	4.00644e-07	protein_coding	high chlorophyll fluorescence phenotype 173
AT1G17744	5.22436	5.64319	5.3048	6.40594	5.15012	5.14411	5.17498	6.36363	3.00525e-05	0.00625504	protein_coding
AT1G18191	7.54892	8.88582	8.02691	8.82906	7.47808	8.31896	7.84975	8.6304	0.34981	5.79741e-12	pseudogene
AT1G19670	10.8217	11.3628	11.3368	12.4126	10.5919	10.8026	11.3097	12.199	6.31077e-05	1.43644e-06	protein_coding	chlorophyllase 1
AT1G20030	6.21107	6.8762	6.47509	7.72421	6.12868	6.60024	6.10475	7.95584	1.17259e-12	0.000663935	protein_coding	Pathogenesis-related thaumatin superfamily protein
AT1G20515	6.56215	6.76477	7.21895	7.61514	6.21568	6.09794	7.14512	7.34189	0.000535689	6.41285e-07	other_rna	other RNA
AT1G21100	13.2786	14.1555	13.7321	14.677	13.2177	14.3503	13.5028	14.8781	2.892e-05	0.00118161	protein_coding	O-methyltransferase family protein
AT1G21120	13.4067	14.3957	13.8642	14.9376	13.3312	14.6311	13.6282	15.0536	0.000387854	2.71893e-05	protein_coding	O-methyltransferase family protein
AT1G21130	11.1909	11.669	11.5274	12.5227	11.0004	11.6477	11.2918	12.6573	0.000262554	3.10165e-05	protein_coding	O-methyltransferase family protein
AT1G21410	9.53222	11.052	9.97734	11.691	9.41252	10.7567	9.75234	11.9119	0.591649	4.53146e-08	protein_coding	F-box/RNI-like superfamily protein
AT1G21520	8.02172	9.87935	9.17362	11.5422	8.50093	9.78454	9.98856	12.1657	5.04932e-06	0.0184227	protein_coding
AT1G21550	6.56706	7.2725	6.19571	7.63243	6.91757	7.67284	6.67289	8.53436	0.320269	3.91589e-07	protein_coding	Calcium-binding EF-hand family protein
AT1G21790	8.68791	9.32865	8.80585	9.99747	8.34789	9.1696	8.7466	10.3766	0.000112008	0.0136217	protein_coding	TRAM, LAG1 and CLN8 (TLC) lipid-sensing domain containing protein
AT1G22370	8.26516	8.97519	7.76238	9.62616	8.38138	8.58574	7.48426	10.0673	6.59659e-06	0.00560569	protein_coding	UDP-glucosyl transferase 85A5
AT1G22440	10.3091	9.93	10.4907	10.9645	10.5309	10.3484	10.327	10.5274	0.700713	3.02728e-05	protein_coding	Zinc-binding alcohol dehydrogenase family protein
AT1G22490	5.66577	6.75706	6.30574	6.83951	5.763	6.64034	6.17792	6.99926	0.106209	2.86743e-10	protein_coding	basic helix-loop-helix (bHLH) DNA-binding superfamily protein
AT1G22640	10.4745	11.5716	11.2139	12.2915	10.4708	11.7021	11.3981	12.9866	3.18103e-09	2.17828e-08	protein_coding	myb domain protein 3
AT1G22890	6.77693	7.81854	7.90154	9.04814	6.79741	7.74527	8.47602	9.68319	4.23001e-05	1.09296e-06	protein_coding
AT1G23070	5.73808	5.74836	6.37056	7.23494	5.68541	5.83371	5.45112	6.90793	0.141196	1.56302e-05	protein_coding	Protein of unknown function (DUF300)
AT1G23800	11.0779	11.5343	11.6395	12.5947	11.165	11.2823	11.8262	12.2425	1.69389e-10	6.53168e-06	protein_coding	aldehyde dehydrogenase 2B7
AT1G23870	9.14552	9.46417	9.6301	10.5023	9.17532	9.39532	9.8356	10.6694	2.69567e-07	0.000758752	protein_coding	trehalose-phosphatase/synthase 9
AT1G24145	5.91611	7.26309	5.77524	7.24742	6.95648	6.83039	6.80734	8.50864	0.876888	0.00455672	protein_coding
AT1G24330	6.66587	7.03487	6.99538	7.5981	6.67258	6.99395	6.98227	7.74233	8.81294e-06	2.77313e-05	protein_coding	ARM repeat superfamily protein
AT1G24580	7.89921	8.91068	8.47557	9.31166	7.43442	9.00258	7.47955	10.4274	0.000212068	0.000868486	protein_coding	RING/U-box superfamily protein
AT1G25340	4.7476	4.83964	5.04765	4.99967	4.78662	4.74325	5.2277	5.92575	8.59803e-05	6.67638e-06	protein_coding	myb domain protein 116
AT1G26560	11.3831	12.3489	12.1325	13.3446	11.1651	12.1147	11.9777	13.1337	2.81267e-12	5.29593e-08	protein_coding	beta glucosidase 40
AT1G26700	5.34979	6.60489	6.51923	7.60664	5.84619	6.6728	6.44241	7.59918	0.00287786	0.00975829	protein_coding	Seven transmembrane MLO family protein
AT1G26800	5.10808	5.65765	5.35028	5.83696	5.16365	5.71096	5.29275	6.31065	0.170099	0.00345664	protein_coding	RING/U-box superfamily protein
AT1G26930	10.9783	11.1319	11.1683	12.0094	11.2148	11.2811	11.2221	11.8226	7.02659e-05	7.14553e-05	protein_coding	Galactose oxidase/kelch repeat superfamily protein
AT1G27290	6.90953	6.99242	7.43149	8.33083	7.46028	7.51504	7.81676	8.40684	2.023e-07	9.84223e-13	protein_coding
AT1G27461	4.96712	6.09828	6.78836	7.63867	4.92129	5.72242	5.90562	6.34906	0.0101296	0.00774831	protein_coding
AT1G27490	5.1939	5.3871	5.07589	6.09344	4.89853	5.22732	5.09491	5.08306	0.273472	4.28121e-07	protein_coding	F-box and associated interaction domains-containing protein
AT1G27990	4.90492	5.43651	5.96979	8.00497	5.32286	5.76102	6.53921	6.95545	0.00017495	0.000593223	protein_coding
AT1G28010	9.29037	9.37846	9.31284	10.1116	9.41153	9.79527	9.78371	10.5408	4.58761e-07	7.64643e-07	protein_coding	P-glycoprotein 14
AT1G28190	7.22524	8.09745	7.84231	9.03573	7.43997	8.00923	8.01767	9.0805	6.43065e-08	0.00150351	protein_coding
AT1G28230	8.89102	9.22162	9.45887	9.87246	8.82964	9.10236	9.44831	9.78736	0.666645	6.16261e-08	protein_coding	purine permease 1
AT1G28260	8.17934	9.30105	8.91002	10.1925	8.2699	9.3598	9.00353	10.385	5.23369e-08	0.0350601	protein_coding	Telomerase activating protein Est1
AT1G28370	6.22541	9.54819	7.19732	10.0499	6.77643	9.6618	7.74852	10.4064	0.586634	2.40485e-09	protein_coding	ERF domain protein 11
AT1G29640	8.92327	11.4861	9.87452	12.3791	8.74699	11.6857	9.62985	12.576	0.079016	0.000866208	protein_coding	Protein of unknown function, DUF584
AT1G30220	5.27569	5.49456	5.31909	6.30393	5.06089	5.29294	5.23768	6.46547	1.39106e-06	1.06809e-08	protein_coding	inositol transporter 2
AT1G30260	6.93549	7.46158	7.02528	7.55222	6.86869	7.47832	7.16923	7.91232	9.5068e-11	0.00161933	protein_coding
AT1G30500	7.30466	8.01651	8.1836	8.65797	7.03164	7.5367	7.97854	8.80548	2.76086e-05	2.67347e-10	protein_coding	nuclear factor Y, subunit A7
AT1G30757	6.30761	6.72174	6.62061	7.03439	6.15071	6.72709	6.64074	7.17862	1.76682e-10	0.0115193	protein_coding
AT1G30820	8.17678	8.99803	8.90586	9.73601	8.74279	9.38475	8.92198	9.96553	3.25908e-07	4.00955e-13	protein_coding	CTP synthase family protein
AT1G30850	6.9835	7.45269	7.63586	8.47724	7.51548	8.26581	7.9475	8.33655	4.63558e-08	0.00802467	protein_coding	root hair specific 4
AT1G31950	8.01803	8.01339	8.40407	9.19613	8.03531	8.19063	8.10318	8.88471	0.00655772	0.0145268	protein_coding	Terpenoid cyclases/Protein prenyltransferases superfamily protein
AT1G32170	8.48429	8.95386	8.97367	9.53023	8.69416	9.14515	8.90809	9.0594	0.00493608	0.0018491	protein_coding	xyloglucan endotransglucosylase/hydrolase 30
AT1G32560	5.29347	6.2015	6.97193	8.33313	5.25294	6.10755	6.06964	7.02519	0.179	9.43874e-05	protein_coding	Late embryogenesis abundant protein, group 1 protein
AT1G32690	9.9873	10.4711	10.2414	11.054	9.69725	10.2272	10.1991	11.1602	3.37458e-09	3.96621e-06	protein_coding
AT1G32700	11.4884	11.8392	11.7947	12.3532	11.6943	11.9557	12.0796	12.5072	3.7853e-05	6.18697e-09	protein_coding	PLATZ transcription factor family protein
AT1G32928	11.3749	12.277	11.8922	12.7354	11.8518	12.3204	12.2826	12.9583	0.0170108	0.000522252	protein_coding
AT1G33030	5.39394	5.97669	5.68375	6.14424	5.05185	5.29256	5.39588	5.93481	0.0450223	2.42861e-06	protein_coding	O-methyltransferase family protein
AT1G33100	10.8485	11.538	11.3202	12.3158	11.062	11.6524	11.4554	12.4773	5.59901e-07	0.0343185	protein_coding	MATE efflux family protein
AT1G33110	10.7646	11.4747	11.4762	12.3922	11.2477	11.8389	11.6505	12.59	0.00374577	2.80261e-10	protein_coding	MATE efflux family protein
AT1G33970	10.222	10.6466	10.9115	11.5083	10.8572	11.1428	11.2786	11.6287	0.00611792	0.00476595	protein_coding	P-loop containing nucleoside triphosphate hydrolases superfamily protein
AT1G34420	7.41017	8.19825	7.97753	9.04508	7.89214	8.81899	8.06918	8.86522	0.798162	0.00174832	protein_coding	leucine-rich repeat transmembrane protein kinase family protein
AT1G35140	11.5579	12.5825	10.6369	12.751	11.5218	11.0899	10.4475	12.9529	0.0180269	3.17851e-05	protein_coding	Phosphate-responsive 1 family protein
AT1G36160	14.1205	14.4217	14.2639	15.0367	14.0261	14.3818	14.3103	15.0384	0.000675212	7.20091e-06	protein_coding	acetyl-CoA carboxylase 1
AT1G40139	5.35498	5.35569	5.20849	5.72941	5.24808	5.42017	5.71304	6.74901	0.132805	2.11957e-09	transposable_element_gene	transposable element gene
AT1G42470	11.3851	12.0149	11.6378	12.3009	11.2351	11.6659	11.4886	12.3399	9.00611e-06	0.000777068	protein_coding	Patched family protein
AT1G42700	5.19797	5.16842	5.11066	6.0929	5.01603	5.04123	5.7264	5.04536	0.000560061	1.14893e-08	protein_coding
AT1G47128	11.4426	12.1994	12.3248	13.3781	11.4292	12.198	12.2507	13.1942	3.4386e-07	1.74837e-06	protein_coding	Granulin repeat cysteine protease family protein
AT1G51760	6.24994	8.09717	6.28695	8.71978	6.4893	7.99315	6.79529	8.95869	0.229012	2.40956e-06	protein_coding	peptidase M20/M25/M40 family protein
AT1G52000	7.33695	8.89761	8.27111	10.5665	8.08878	9.64753	8.62201	10.863	0.0283172	0.000970017	protein_coding	Mannose-binding lectin superfamily protein
AT1G52030	6.73758	6.75997	6.45043	7.0451	7.59226	7.13586	6.96444	7.99832	0.0591959	0.015217	protein_coding	myrosinase-binding protein 2
AT1G52342	8.10036	9.28916	9.8401	11.7138	8.25672	8.93506	10.0828	12.1305	0.000170729	0.000852755	protein_coding
AT1G52347	9.39661	9.80863	9.68827	10.3633	9.72788	9.90222	9.76928	10.4131	4.84076e-09	2.49678e-11	other_rna	other RNA
AT1G52400	10.0917	10.0859	9.89081	10.7844	10.0713	9.89031	9.46776	10.7429	0.0211651	6.36942e-09	protein_coding	beta glucosidase 18
AT1G52680	4.95219	5.36028	5.27937	6.51123	4.99346	5.63152	5.31631	6.14416	0.728333	1.8711e-06	protein_coding	late embryogenesis abundant protein-related / LEA protein-related
AT1G52880	8.61703	9.48163	9.36588	10.3199	8.83213	9.85187	9.79681	10.6418	2.57283e-06	0.000753162	protein_coding	NAC (No Apical Meristem) domain transcriptional regulator superfamily protein
AT1G52890	5.56726	9.24843	6.77142	11.8828	5.90861	9.55715	6.98369	12.3471	2.42179e-11	1.57392e-05	protein_coding	NAC domain containing protein 19
AT1G52900	4.79116	5.52151	4.81049	6.07434	4.80121	4.93721	4.74051	6.27219	1.18632e-06	0.0484574	protein_coding	Toll-Interleukin-Resistance (TIR) domain family protein
AT1G53080	6.31211	6.66831	6.40919	7.99986	6.17142	6.00751	6.95228	8.1955	0.104826	9.0873e-09	protein_coding	Legume lectin family protein
AT1G53180	10.6599	11.7453	11.2312	11.8824	10.8681	11.8155	11.3614	11.9907	0.137082	3.06356e-06	protein_coding
AT1G53420	4.73186	4.8876	5.04182	4.99172	4.82405	4.96672	5.09647	6.42189	3.76241e-06	0.00063273	protein_coding	Leucine-rich repeat transmembrane protein kinase
AT1G53580	11.8582	12.1722	12.2108	13.2509	11.8708	12.1985	12.1131	13.0703	2.07072e-13	0.000102605	protein_coding	glyoxalase II 3
AT1G53885	8.67642	11.391	9.89177	13.2516	8.62493	11.1247	9.68656	12.8352	0.00157519	1.11738e-09	protein_coding	Protein of unknown function (DUF581)
AT1G53890	6.70192	7.94707	7.17218	9.04836	7.35842	8.31931	8.52357	9.56097	2.58788e-10	5.69429e-06	protein_coding	Protein of unknown function (DUF567)
AT1G53903	8.83907	11.6044	10.0856	13.4537	8.86944	11.3461	9.76318	12.9662	0.457899	3.92388e-06	protein_coding	Protein of unknown function (DUF581)
AT1G54050	10.6349	11.1332	11.1961	11.427	10.4541	10.7943	10.4165	10.9695	0.000740429	4.70282e-09	protein_coding	HSP20-like chaperones superfamily protein
AT1G54100	13.7531	14.8533	14.4557	16.1405	13.9728	14.8039	14.2969	16.1575	8.00643e-06	0.000120353	protein_coding	aldehyde dehydrogenase 7B4
AT1G54120	10.7034	11.5585	11.3898	11.8775	10.3659	11.2975	11.1947	11.6279	2.19764e-05	1.28026e-06	protein_coding
AT1G54160	5.58869	7.0948	6.52266	7.97121	5.54945	6.64103	6.18815	8.04536	0.177512	1.03367e-07	protein_coding	nuclear factor Y, subunit A5
AT1G54870	5.49241	5.54286	7.80544	9.32944	5.34596	5.40683	6.75253	7.4333	0.209362	0.00165006	protein_coding	NAD(P)-binding Rossmann-fold superfamily protein
AT1G55020	13.4756	14.1597	15.0569	15.6994	14.0124	14.7459	14.9295	15.7218	5.2461e-05	0.0032963	protein_coding	lipoxygenase 1
AT1G55110	8.90057	9.68299	9.75837	10.589	8.47867	9.1055	9.5002	10.7341	0.1619	1.09125e-08	protein_coding	indeterminate(ID)-domain 7
AT1G55152	10.793	11.2977	10.9944	11.7773	10.7312	11.4744	11.2039	12.132	0.0481235	0.00170626	protein_coding
AT1G55920	12.8081	13.3147	13.6143	14.4833	12.7328	13.3991	13.4656	14.4566	0.0145366	1.10248e-07	protein_coding	serine acetyltransferase 2;1
AT1G56170	10.5671	11.5353	11.0898	12.0619	10.9516	11.6737	10.8012	12.0748	0.32061	1.17191e-06	protein_coding	nuclear factor Y, subunit C2
AT1G56220	14.2758	14.939	14.6191	15.4919	14.02	14.5257	14.7079	15.7681	0.00352405	0.00015531	protein_coding	Dormancy/auxin associated family protein
AT1G56650	9.19811	11.3269	10.4004	12.5508	9.41971	11.5109	9.9206	12.1132	1.72227e-05	0.000593405	protein_coding	production of anthocyanin pigment 1
AT1G57990	10.0616	11.3346	10.6928	12.1201	10.2881	10.9065	10.6279	12.1116	0.000841655	6.61208e-05	protein_coding	purine permease 18
AT1G58030	12.0724	12.5002	12.4947	13.0001	12.1304	12.4416	12.3916	13.116	1.98044e-05	3.17044e-06	protein_coding	cationic amino acid transporter 2
AT1G58235	10.1125	10.9052	10.4797	11.3154	10.3083	11.1259	10.5238	11.6505	6.14913e-07	0.00195141	protein_coding
AT1G59640	7.66664	8.41069	8.78421	9.15237	7.34172	7.96922	8.35925	9.08018	1.23239e-09	3.6579e-09	protein_coding	BIG PETAL P
AT1G59700	8.97166	10.4008	9.58362	11.076	9.07555	10.2675	9.78661	11.0978	0.617344	5.17287e-10	protein_coding	glutathione S-transferase TAU 16
AT1G60260	7.59316	7.8719	7.94934	8.29324	7.69335	7.86953	8.48158	8.7263	7.40244e-05	6.78918e-08	protein_coding	beta glucosidase 5
AT1G60270	9.6095	10.1776	9.70783	10.5129	9.45805	9.93312	9.65552	10.6979	0.000323655	7.2361e-05	protein_coding	beta glucosidase 6
AT1G61820	10.0825	10.9879	10.934	11.3836	10.3015	11.3491	11.0897	11.5916	0.000160946	8.208e-10	protein_coding	beta glucosidase 46
AT1G62290	11.0906	11.4559	12.3626	12.572	11.7168	12.2028	12.6509	12.971	0.00396321	7.87401e-09	protein_coding	Saposin-like aspartyl protease family protein
AT1G62580	6.02002	7.33856	6.38619	7.96021	6.31021	7.64981	6.71678	8.74137	2.77011e-05	2.97181e-08	protein_coding	Flavin-binding monooxygenase family protein
AT1G63030	5.06254	5.21119	5.02001	6.03217	4.88794	5.13574	4.92613	5.77947	1.8172e-07	6.78823e-06	protein_coding	Integrase-type DNA-binding superfamily protein
AT1G63180	10.6741	10.9977	10.8255	11.1601	10.2596	10.5578	10.5938	11.551	0.0141796	0.00719821	protein_coding	UDP-D-glucose/UDP-D-galactose 4-epimerase 3
AT1G63340	6.29782	7.72085	6.58254	8.25953	6.68836	8.01409	7.18426	9.00659	0.00383773	4.23189e-07	protein_coding	Flavin-containing monooxygenase family protein
AT1G63840	10.9165	11.7462	11.6189	12.2329	10.947	11.733	11.5355	12.3698	0.0118322	3.55325e-05	protein_coding	RING/U-box superfamily protein
AT1G64195	5.72886	7.12802	6.15286	7.21104	5.98314	6.92545	6.29385	6.45348	0.00691593	2.85782e-05	protein_coding	Defensin-like (DEFL) family protein
AT1G64625	7.65502	7.52712	7.83405	7.62664	7.74553	7.9795	7.92297	8.8412	0.0594638	1.20602e-05	protein_coding	Serine/threonine-protein kinase WNK (With No Lysine)-related
AT1G64710	7.5005	7.90748	7.86167	8.54867	7.57701	7.82978	8.23076	8.56067	0.0155723	3.75301e-05	protein_coding	GroES-like zinc-binding dehydrogenase family protein
AT1G64890	9.13979	9.69897	9.43927	10.1456	8.85862	9.43623	9.00846	9.75551	0.00103708	8.57965e-09	protein_coding	Major facilitator superfamily protein
AT1G64940	8.04256	8.34889	8.50983	9.25482	8.39374	8.82787	8.64057	9.59817	0.225897	1.28136e-05	protein_coding	cytochrome P450, family 87, subfamily A, polypeptide 6
AT1G64950	8.5077	9.97118	9.2145	10.6859	8.88047	10.2847	9.48843	11.3044	0.356343	4.50815e-05	protein_coding	cytochrome P450, family 89, subfamily A, polypeptide 5
AT1G64970	9.39272	9.88165	10.4183	10.5579	9.1942	9.52898	9.95539	10.559	0.506334	1.97652e-05	protein_coding	gamma-tocopherol methyltransferase
AT1G65580	11.2557	11.8015	11.5418	12.175	11.5167	11.9467	11.7232	12.2683	0.080459	1.0086e-07	protein_coding	Endonuclease/exonuclease/phosphatase family protein
AT1G65920	10.0583	10.2192	10.4795	10.8408	9.77263	9.76287	10.5176	10.8267	0.639791	1.7255e-07	protein_coding	Regulator of chromosome condensation (RCC1) family with FYVE zinc finger domain
AT1G66180	13.0808	13.7343	13.727	14.1829	13.2649	13.6852	14.0066	14.3548	0.635444	5.7465e-07	protein_coding	Eukaryotic aspartyl protease family protein
AT1G66540	7.91871	8.07857	7.96668	8.43641	7.43231	7.58855	8.79138	9.23287	0.173031	0.00409333	protein_coding	Cytochrome P450 superfamily protein
AT1G66760	8.83466	11.1116	9.09071	12.4432	8.92173	10.9225	9.44586	12.9716	0.0259182	0.0449936	protein_coding	MATE efflux family protein
AT1G66950	8.10952	8.29181	8.65006	9.27036	8.71286	8.99854	8.81542	9.37421	0.508408	0.00313718	protein_coding	pleiotropic drug resistance 11
AT1G67300	9.04378	9.90037	9.32214	10.1925	9.02685	9.67238	9.13682	10.2453	9.4259e-10	0.00263065	protein_coding	Major facilitator superfamily protein
AT1G67370	7.26336	7.26335	7.56688	7.87664	6.52525	6.87583	6.66475	7.34949	2.20805e-06	0.00129865	protein_coding	DNA-binding HORMA family protein
AT1G67810	8.79749	10.2464	10.8762	11.778	9.37922	10.4868	10.9782	11.9796	0.812323	0.0151922	protein_coding	sulfur E2
AT1G67980	5.36021	7.5917	5.65482	8.62619	5.21978	8.03627	5.87797	8.51666	0.040729	8.46747e-05	protein_coding	caffeoyl-CoA 3-O-methyltransferase
AT1G68020	9.4974	10.4492	10.1303	11.5364	9.43239	10.2992	10.1069	11.7745	0.585297	0.00151489	protein_coding	UDP-Glycosyltransferase / trehalose-phosphatase family protein
AT1G68170	4.96817	5.16801	5.45719	5.7165	5.20617	5.32588	5.90082	6.37951	1.53548e-05	6.76252e-10	protein_coding	nodulin MtN21 /EamA-like transporter family protein
AT1G68440	12.0114	12.2355	12.2999	13.0304	12.1082	12.2673	12.2492	12.8839	3.18001e-10	8.10044e-08	protein_coding
AT1G68620	7.42562	10.7812	8.52104	12.4104	7.64829	9.95812	8.52718	12.7114	2.33223e-05	5.94706e-05	protein_coding	alpha/beta-Hydrolases superfamily protein
AT1G68670	11.7223	12.2621	12.1917	12.5309	12.0819	12.361	12.3116	12.7392	1.85714e-06	0.000514329	protein_coding	myb-like transcription factor family protein
AT1G68735	5.44894	6.60579	6.39539	8.57515	5.82211	6.85488	7.10087	9.11134	0.422543	1.3465e-07	pseudogene
AT1G68795	7.92943	8.15054	8.0593	8.79789	7.60918	8.30616	7.93494	8.71742	1.132e-07	0.0171256	protein_coding	CLAVATA3/ESR-RELATED 12
AT1G68905	5.55541	5.36072	5.41545	6.3878	5.21503	4.99122	5.19279	5.28758	1.66259e-07	7.39391e-06	protein_coding	Defensin-like (DEFL) family protein
AT1G69310	8.91361	9.27746	9.39816	9.90895	9.46892	9.73425	10.0505	10.3476	1.13194e-05	2.70958e-06	protein_coding	WRKY DNA-binding protein 57
AT1G69360	8.33547	9.2376	9.40313	10.3222	8.43353	9.37581	9.44275	10.4521	4.77617e-08	2.28744e-06	protein_coding	Plant protein of unknown function (DUF863)
AT1G69480	6.04108	9.71833	6.94206	11.0633	6.07359	9.18161	6.91896	11.5639	2.7371e-09	0.000231406	protein_coding	EXS (ERD1/XPR1/SYG1) family protein
AT1G69490	6.27107	8.11644	8.1304	10.7993	6.3512	8.46868	8.4935	11.5595	0.000685208	0.00408859	protein_coding	NAC-like, activated by AP3/PI
AT1G69600	8.27162	9.24625	9.29982	10.6999	8.18727	8.83261	8.95406	10.586	0.00169119	6.72232e-07	protein_coding	zinc finger homeodomain 1
AT1G69920	5.41891	8.38806	6.83125	9.46703	5.16755	8.75531	6.35793	9.48353	3.06868e-08	0.000156991	protein_coding	glutathione S-transferase TAU 12
AT1G70140	9.27538	9.92467	9.53909	10.1021	9.18035	9.67949	9.63575	10.307	5.67499e-06	5.08545e-07	protein_coding	formin 8
AT1G70530	10.8587	11.3104	11.5743	11.5959	10.8146	11.2942	11.3963	11.8647	0.0364295	0.000334044	protein_coding	cysteine-rich RLK (RECEPTOR-like protein kinase) 3
AT1G70640	4.94972	5.20708	4.75483	6.01007	5.01113	5.17464	5.00694	6.3416	0.184336	2.34727e-05	protein_coding	octicosapeptide/Phox/Bem1p (PB1) domain-containing protein
AT1G70690	8.3089	8.18305	8.5201	9.0001	8.5488	8.55498	7.97805	8.21742	0.000591163	0.0094966	protein_coding	Receptor-like protein kinase-related family protein
AT1G70700	10.0554	11.3273	10.4234	13.2972	10.4031	10.5128	10.5889	12.9037	0.00117672	1.24461e-05	protein_coding	TIFY domain/Divergent CCT motif family protein
AT1G70860	5.96736	6.33969	6.73471	6.65805	6.46691	6.9147	6.67087	7.00529	0.00017765	4.57829e-05	protein_coding	Polyketide cyclase/dehydrase and lipid transport superfamily protein
AT1G70920	7.03054	8.31189	7.8483	8.68872	7.2366	8.4536	7.6073	8.63373	0.0717742	6.60353e-07	protein_coding	homeobox-leucine zipper protein 18
AT1G71000	4.72498	6.09031	4.95012	6.45662	4.80785	5.57761	5.56467	6.49398	7.28577e-05	3.09094e-06	protein_coding	Chaperone DnaJ-domain superfamily protein
AT1G71890	7.87411	7.79141	7.75985	8.37944	7.98653	7.68714	8.00719	9.02498	7.10502e-07	0.0101605	protein_coding	Major facilitator superfamily protein
AT1G71910	6.74344	6.98615	6.90548	7.58306	6.90973	7.26626	6.70866	7.75247	3.30966e-07	2.75524e-08	protein_coding
AT1G72060	8.61183	9.66597	9.26307	10.7492	8.6872	9.10265	9.30758	10.9426	0.0773125	0.0111241	protein_coding	serine-type endopeptidase inhibitors
AT1G72100	5.38281	6.81696	7.49779	9.71378	5.5469	6.40913	6.84827	8.11648	3.97742e-05	0.024058	protein_coding	late embryogenesis abundant domain-containing protein / LEA domain-containing protein
AT1G72140	10.3592	10.9248	11.0908	11.1488	9.88219	10.6773	10.4362	10.6972	1.06929e-07	1.70588e-10	protein_coding	Major facilitator superfamily protein
AT1G72450	5.27733	6.2366	5.22946	7.05629	5.81952	6.15761	5.77948	6.91882	0.809999	0.0390285	protein_coding	jasmonate-zim-domain protein 6
AT1G72680	11.3027	11.6651	11.4806	12.2758	11.284	11.3424	11.2336	12.3432	9.84997e-09	5.04635e-05	protein_coding	cinnamyl-alcohol dehydrogenase
AT1G72900	8.13151	8.96463	7.8753	9.6775	8.62985	9.34684	8.01272	10.1562	1.23341e-08	1.44249e-05	protein_coding	Toll-Interleukin-Resistance (TIR) domain-containing protein
AT1G73500	10.3492	11.9646	11.3008	13.0935	10.6641	11.6043	11.1799	13.3372	0.141897	1.47224e-05	protein_coding	MAP kinase kinase 9
AT1G73550	6.61046	6.49042	7.14824	7.83109	5.61521	5.65153	6.64416	7.26798	3.43359e-07	0.000686493	protein_coding	Bifunctional inhibitor/lipid-transfer protein/seed storage 2S albumin superfamily protein
AT1G73680	6.18392	6.45256	6.82432	7.70629	6.22757	6.61968	6.72742	8.08609	0.0217385	5.52085e-08	protein_coding	alpha dioxygenase
AT1G73750	5.25387	5.65904	5.40557	6.11695	5.3235	5.83907	5.53388	6.40629	0.00610695	0.000490571	protein_coding	Uncharacterised conserved protein UCP031088, alpha/beta hydrolase
AT1G73920	11.1524	12.1788	11.4881	12.5694	11.0067	12.1764	11.4612	12.8769	6.46407e-07	0.00238339	protein_coding	alpha/beta-Hydrolases superfamily protein
AT1G74010	9.45372	9.97669	10.2535	10.949	9.37261	9.58968	9.93964	10.7746	0.079715	3.9004e-06	protein_coding	Calcium-dependent phosphotriesterase superfamily protein
AT1G74490	8.61323	8.80899	9.03291	9.61599	8.73986	9.2394	8.89244	9.48679	0.00102012	1.43799e-05	protein_coding	Protein kinase superfamily protein
AT1G74710	9.99171	10.6584	10.6694	11.0442	10.2092	10.4661	10.5325	10.8583	6.75643e-10	0.00223535	protein_coding	ADC synthase superfamily protein
AT1G74790	8.4836	8.74053	8.77954	9.5719	8.62747	9.0261	8.79812	9.61915	0.132535	4.58818e-05	protein_coding	catalytics
AT1G75000	7.96134	9.80833	8.81941	10.0623	7.71185	9.81637	8.42675	10.1657	0.000236613	0.000313919	protein_coding	GNS1/SUR4 membrane protein family
AT1G75370	10.6342	11.2206	10.9709	11.7366	10.7121	11.3383	11.1933	11.9753	0.000251867	3.7863e-05	protein_coding	Sec14p-like phosphatidylinositol transfer family protein
AT1G75490	6.39206	7.68508	6.92899	8.74242	6.12803	7.10221	7.03737	9.18797	1.66563e-07	7.27276e-07	protein_coding	Integrase-type DNA-binding superfamily protein
AT1G75600	7.14159	7.69764	8.35202	8.61298	6.80366	7.75253	7.2966	8.70365	0.0118252	0.00077594	protein_coding	Histone superfamily protein
AT1G76180	12.8269	14.4201	13.3431	15.2361	12.8627	14.3372	13.2917	15.464	9.95227e-05	2.3497e-05	protein_coding	Dehydrin family protein
AT1G76560	10.7705	11.1573	11.6243	11.9345	10.7809	11.1622	11.4507	11.934	0.00171195	2.46643e-08	protein_coding	CP12 domain-containing protein 3
AT1G76570	9.75373	10.1692	9.7522	10.2406	9.59238	10.1846	10.033	10.6495	0.225058	2.30954e-09	protein_coding	Chlorophyll A-B binding family protein
AT1G76590	7.52922	8.56713	8.12324	9.22894	7.45005	8.58539	7.8962	9.69721	4.97051e-05	1.9306e-09	protein_coding	PLATZ transcription factor family protein
AT1G76650	10.268	11.2357	11.5744	11.4963	10.7868	10.518	10.2487	11.4948	0.26872	0.000186076	protein_coding	calmodulin-like 38
AT1G77000	8.92203	9.85746	9.07079	10.6427	8.84512	9.56705	8.98864	10.811	1.54037e-07	0.000259312	protein_coding	RNI-like superfamily protein
AT1G77145	6.86068	7.21916	7.44489	7.98935	6.99286	7.26297	7.25637	7.99004	0.100351	0.00131595	protein_coding	Protein of unknown function (DUF506)
AT1G77200	9.75608	10.3164	10.3968	10.4274	9.4099	9.91531	9.80912	10.454	0.0611305	0.0241945	protein_coding	Integrase-type DNA-binding superfamily protein
AT1G77765	6.49429	6.76132	6.89445	7.59547	6.50478	6.63642	7.08855	7.20202	0.0516027	8.5586e-06	protein_coding
AT1G77855	8.63966	8.8377	9.16134	9.49632	8.7926	9.20545	9.05277	9.6815	0.0602994	3.6594e-07	protein_coding
AT1G78210	11.393	12.1049	11.7533	12.8554	11.5463	12.1058	11.9617	12.7114	1.55812e-05	0.00190768	protein_coding	alpha/beta-Hydrolases superfamily protein
AT1G78680	11.4325	12.7679	11.9372	13.2978	11.5238	12.8221	11.8271	13.3978	0.00027133	6.17395e-05	protein_coding	gamma-glutamyl hydrolase 2
AT1G79270	10.7674	12.2068	11.138	12.8384	10.8887	12.1542	10.9647	13.1875	3.21994e-06	1.76117e-08	protein_coding	evolutionarily conserved C-terminal region 8
AT1G79360	7.00094	7.43373	7.43343	8.00901	6.75968	7.61681	7.36364	7.72925	3.10948e-08	9.67892e-08	protein_coding	organic cation/carnitine transporter 2
AT1G79610	10.1703	10.5421	10.5467	11.166	10.4514	10.8854	10.6168	11.2924	0.0609823	2.9932e-11	protein_coding	Na+/H+ antiporter 6
AT1G79900	5.62009	5.79125	6.18032	7.00684	5.49327	5.43443	5.58929	6.11085	0.159973	0.00146925	protein_coding	Mitochondrial substrate carrier family protein
AT1G79970	11.6956	12.3387	12.1805	12.7503	11.5633	12.1199	12.0732	12.7163	2.85825e-06	4.0042e-07	protein_coding
AT1G80090	5.38572	5.4483	5.87107	6.95463	5.02488	5.09649	5.34268	5.86047	0.011647	0.0166748	protein_coding	Cystathionine beta-synthase (CBS) family protein
AT1G80110	8.12215	10.9778	8.96908	12.2142	7.98543	10.4403	9.01248	12.6322	0.000302494	8.63533e-06	protein_coding	phloem protein 2-B11
AT1G80390	4.89716	5.32086	5.6888	5.73819	4.95456	5.43868	5.47855	6.75903	1.1522e-10	1.89651e-08	protein_coding	indole-3-acetic acid inducible 15
AT1G80960	8.26026	8.64148	9.01754	9.69082	7.67402	7.98765	8.53967	9.12284	0.0989422	0.000789391	protein_coding	F-box and Leucine Rich Repeat domains containing protein
AT2G01600	7.6512	8.01101	7.79964	8.33842	7.90342	8.48636	8.05497	8.66254	4.89939e-06	0.00214075	protein_coding	ENTH/ANTH/VHS superfamily protein
AT2G02710	10.064	10.8353	10.6573	12.5588	10.1297	10.9065	10.7437	13.1029	0.00420824	0.00327993	protein_coding	PAS/LOV protein B
AT2G02850	8.29131	8.49481	8.889	9.32635	8.46692	8.92233	9.03778	9.66923	0.206472	9.29864e-05	protein_coding	plantacyanin
AT2G02990	11.4512	11.9242	12.7997	13.817	10.854	11.1526	12.1224	13.4461	3.63871e-11	4.15772e-06	protein_coding	ribonuclease 1
AT2G03240	8.7644	9.83725	9.1453	10.2102	9.0144	9.94735	9.23542	10.3637	2.27705e-06	8.63193e-06	protein_coding	EXS (ERD1/XPR1/SYG1) family protein
AT2G03520	4.9047	5.11315	5.58868	6.04611	4.81182	5.15607	4.99637	5.68946	0.000481759	4.87406e-08	protein_coding	ureide permease 4
AT2G04066	8.8187	9.34323	9.2257	9.78441	8.78263	9.27016	9.15475	9.82003	6.13349e-07	6.56132e-09	protein_coding	MATE efflux family protein
AT2G04240	10.4228	10.9899	10.8524	11.0149	10.0968	11.0965	10.7521	11.2852	0.120671	3.31291e-05	protein_coding	RING/U-box superfamily protein
AT2G05710	6.80539	7.17271	7.55329	7.66099	7.09635	7.44608	7.75857	7.93311	0.0838643	7.70742e-06	protein_coding	aconitase 3
AT2G07100	5.08969	5.07075	5.02561	6.02632	5.00258	4.98755	4.98653	5.10147	4.3256e-11	6.86691e-07	transposable_element_gene	transposable element gene
AT2G10760	4.97808	4.83786	5.0267	5.708	5.15992	4.65307	4.88622	4.83876	0.0575372	0.009421	transposable_element_gene	transposable element gene
AT2G11030	4.85065	5.04184	4.77336	5.90165	4.83298	4.81332	5.05692	4.8523	3.803e-05	0.00337573	transposable_element_gene	transposable element gene
AT2G12120	5.23947	5.07456	5.36578	6.12925	5.0625	5.06132	5.3287	5.12625	0.00609605	3.36993e-07	transposable_element_gene	transposable element gene
AT2G12490	7.51954	7.9091	7.37923	7.82028	7.47376	7.9045	8.22555	8.62798	1.19573e-08	0.00510945	transposable_element_gene	transposable element gene
AT2G13273	4.86652	4.83672	4.76434	5.73153	4.87172	4.69642	4.86637	4.79413	0.283915	1.73647e-08	protein_coding
AT2G14878	12.229	12.5657	13.0638	13.4624	12.1513	12.4395	12.5579	13.1704	0.000997989	0.0240579	other_rna
AT2G15010	4.88107	4.9246	6.19162	7.62368	5.24985	4.90152	5.57285	5.35667	9.65597e-05	0.000154757	protein_coding	Plant thionin
AT2G15070	5.18606	5.03335	5.14295	6.088	5.01435	4.93832	5.27386	5.15434	0.469535	0.00981198	transposable_element_gene	transposable element gene
AT2G15490	10.496	11.2412	11.1172	12.2093	10.9241	11.6204	11.0826	12.277	1.12728e-06	1.14377e-05	protein_coding	UDP-glycosyltransferase 73B4
AT2G15870	4.89733	5.07945	5.03794	6.14474	4.92719	4.8353	5.0366	5.0302	0.000629084	0.000185613	transposable_element_gene	transposable element gene
AT2G15960	11.627	13.0098	12.7061	13.7714	12.1504	12.9165	12.7512	14.5481	5.7717e-06	6.01047e-08	protein_coding
AT2G15970	12.7867	14.5064	13.3777	15.6172	12.7611	14.4026	13.4027	15.4252	0.0188295	8.16564e-05	protein_coding	cold regulated 413 plasma membrane 1
AT2G16365	10.774	11.2737	11.3221	11.7372	10.6305	11.0211	11.3618	11.8331	9.06731e-07	1.74052e-09	protein_coding	F-box family protein
AT2G16367	7.29968	8.34535	7.94014	9.9906	7.312	8.57355	7.55454	10.109	0.500868	0.000474729	pseudogene
AT2G16720	10.4264	11.6019	11.119	12.4985	10.5469	11.877	11.2986	12.7228	1.84925e-08	8.46603e-08	protein_coding	myb domain protein 7
AT2G16830	8.62905	8.77625	8.89029	9.74701	8.77058	9.18934	9.10966	9.82239	1.03007e-05	2.77852e-08	pseudogene
AT2G17450	10.839	11.8745	11.3506	12.0661	10.7326	11.6163	11.1285	12.302	1.68056e-06	1.79232e-07	protein_coding	RING-H2 finger A3A
AT2G17500	10.7593	11.345	11.4865	12.3999	10.8909	11.4068	11.1246	12.0921	8.27651e-07	0.00264767	protein_coding	Auxin efflux carrier family protein
AT2G17730	6.61102	7.17155	6.85915	7.31256	6.62655	7.10561	6.80988	7.76452	0.291316	0.000337369	protein_coding	NEP-interacting protein 2
AT2G18120	8.28751	8.05498	8.3706	8.45403	8.12466	8.23122	9.08972	9.01516	0.11593	0.00291828	protein_coding	SHI-related sequence 4
AT2G18170	5.96687	7.0993	6.35399	7.6263	6.00564	6.97211	6.1757	8.08168	0.000799834	2.37568e-07	protein_coding	MAP kinase 7
AT2G18340	5.05258	6.0279	5.9309	7.40737	5.31533	5.98284	5.53426	7.07626	0.00777122	0.00861116	protein_coding	late embryogenesis abundant domain-containing protein / LEA domain-containing protein
AT2G18540	5.32558	6.13	5.88191	8.11339	5.22814	6.00456	6.66272	7.66568	0.000268639	0.0348112	protein_coding	RmlC-like cupins superfamily protein
AT2G18550	4.8381	6.60317	5.30005	8.32709	5.08011	6.96802	5.34672	9.17263	0.606814	0.000301014	protein_coding	homeobox protein 21
AT2G18700	10.7328	11.9254	11.1873	13.5275	10.5896	11.2641	11.3594	13.9244	0.403188	0.000562387	protein_coding	trehalose phosphatase/synthase 11
AT2G19320	4.59423	4.8716	5.30026	6.04539	4.56706	4.93399	5.146	5.44481	0.000803882	2.82829e-07	protein_coding
AT2G20770	7.86064	8.24069	8.34869	8.8229	7.4411	7.68869	7.69949	8.28137	8.08314e-05	0.000743573	protein_coding	GCR2-like 2
AT2G21820	5.88229	9.63891	7.81072	10.7083	6.04589	8.94105	6.87565	10.1255	0.207892	0.00606847	protein_coding
AT2G23240	5.08386	4.9533	5.45769	6.15771	5.50968	5.22649	5.16676	5.18937	3.50867e-08	1.68353e-08	protein_coding	Plant EC metallothionein-like protein, family 15
AT2G24260	10.9895	11.263	11.8633	12.5681	10.9389	11.1131	11.7609	12.4151	0.0131068	0.00127512	protein_coding	LJRHL1-like 1
AT2G24540	10.9802	12.4157	11.2628	13.0962	10.8054	12.3429	11.5308	13.7408	4.52479e-07	0.000143864	protein_coding	Galactose oxidase/kelch repeat superfamily protein
AT2G24740	4.87039	4.85888	5.59081	5.97283	4.88556	5.19062	6.05466	6.84332	1.51875e-07	3.59952e-10	protein_coding	SET domain group 21
AT2G25450	15.8017	15.9069	15.3512	16.5124	15.774	15.8769	15.2962	16.4657	0.000882689	7.18819e-12	protein_coding	2-oxoglutarate (2OG) and Fe(II)-dependent oxygenase superfamily protein
AT2G25470	5.80353	6.30383	5.70969	5.96464	6.30236	6.44683	6.5329	7.09187	0.939672	0.000380258	protein_coding	receptor like protein 21
AT2G25770	6.30825	6.01053	6.08644	6.69245	6.35485	5.83799	6.3706	7.28044	0.00169727	2.04186e-10	protein_coding	Polyketide cyclase/dehydrase and lipid transport superfamily protein
AT2G25900	9.89768	11.4182	11.0461	11.9801	9.75941	10.8674	10.8752	12.4415	0.0439653	0.000369093	protein_coding	Zinc finger C-x8-C-x5-C-x3-H type family protein
AT2G27150	10.358	10.7844	10.5	11.2566	10.4255	10.6771	10.6324	11.5813	0.000154502	1.01152e-07	protein_coding	abscisic aldehyde oxidase 3
AT2G27310	10.2497	11.283	10.9973	11.852	10.5404	11.1753	10.7869	11.8953	0.00031666	0.00157892	protein_coding	F-box family protein
AT2G27385	13.9615	14.5125	15.0169	15.0856	13.1437	13.7898	14.7774	15.3795	7.60961e-05	0.00170185	protein_coding	Pollen Ole e 1 allergen and extensin family protein
AT2G28400	7.98082	10.5415	9.20065	11.8214	8.23763	10.9696	9.13677	12.4394	6.41876e-08	0.00031027	protein_coding	Protein of unknown function, DUF584
AT2G28420	5.27236	5.33569	5.81685	6.27512	5.35286	5.51666	5.53054	5.765	0.625471	3.8692e-09	protein_coding	Lactoylglutathione lyase / glyoxalase I family protein
AT2G28490	5.19361	5.10359	8.64129	10.458	5.84657	6.14306	7.90878	8.35321	0.000354577	5.90977e-05	protein_coding	RmlC-like cupins superfamily protein
AT2G28500	7.10103	8.24596	7.57393	9.64014	7.07622	8.54468	8.26337	10.136	7.74616e-05	2.17698e-05	protein_coding	LOB domain-containing protein 11
AT2G29060	9.62908	10.2219	10.1839	10.7544	9.71011	10.1971	10.2217	10.6929	1.61896e-06	5.16565e-06	protein_coding	GRAS family transcription factor
AT2G29090	9.29905	9.32715	9.20895	9.27476	8.87972	9.0591	9.94075	9.8057	0.000456539	6.48013e-11	protein_coding	cytochrome P450, family 707, subfamily A, polypeptide 2
AT2G29490	9.70732	10.5868	10.4896	11.2728	10.1802	10.7483	10.2715	11.3219	0.449063	4.63281e-07	protein_coding	glutathione S-transferase TAU 1
AT2G29990	7.32442	7.77764	7.85467	8.59859	7.22742	7.61697	7.69743	8.70948	0.0044278	0.020073	protein_coding	alternative NAD(P)H dehydrogenase 2
AT2G30500	12.1868	12.6939	12.5615	13.041	11.9739	12.758	12.431	13.0038	0.0027183	1.5708e-06	protein_coding	Kinase interacting (KIP1-like) family protein
AT2G31083	5.13984	5.61739	5.03252	6.95922	5.01924	5.64434	4.76694	6.65113	3.56496e-06	0.000487579	protein_coding	CLAVATA3/ESR-RELATED 5
AT2G31570	14.0658	14.1426	14.335	14.8672	13.9283	14.0993	14.4305	14.9748	0.000192682	2.32993e-11	protein_coding	glutathione peroxidase 2
AT2G31585	12.468	12.9231	13.1068	13.5282	12.3017	12.6014	12.7949	13.362	4.22788e-11	3.1402e-08	other_rna	other RNA
AT2G31945	6.37962	7.7656	6.73511	8.57215	6.27143	6.92455	6.70495	8.6377	1.11569e-05	0.00098899	protein_coding
AT2G32100	8.69151	8.89173	9.07403	9.68528	8.63868	8.65872	9.27689	9.21917	0.0520824	8.35173e-08	protein_coding	ovate family protein 16
AT2G32150	10.7385	13.3981	11.2968	13.8705	10.8714	12.9507	11.6475	14.0843	7.0214e-11	1.72446e-07	protein_coding	Haloacid dehalogenase-like hydrolase (HAD) superfamily protein
AT2G32660	6.18196	7.02087	8.4105	9.31793	6.28431	6.62816	7.33883	8.22376	0.000248259	0.000242509	protein_coding	receptor like protein 22
AT2G33520	5.14258	5.06903	6.04088	6.62438	5.05956	5.42885	5.61599	6.16379	3.15697e-06	2.12575e-06	protein_coding
AT2G33590	11.1869	11.6965	11.3989	12.1936	11.4135	11.776	11.3263	12.3032	0.00222161	7.51282e-05	protein_coding	NAD(P)-binding Rossmann-fold superfamily protein
AT2G33830	10.9843	11.0536	11.9669	13.6151	10.7603	10.3666	11.892	13.2587	3.50759e-06	0.00773391	protein_coding	Dormancy/auxin associated family protein
AT2G34180	6.03124	6.9769	6.70235	7.19371	5.83392	7.00661	6.22173	7.08382	1.35845e-08	9.0912e-06	protein_coding	CBL-interacting protein kinase 13
AT2G34810	10.1606	10.2413	10.6455	11.442	9.76217	10.3429	10.2542	11.7189	0.162817	9.46278e-05	protein_coding	FAD-binding Berberine family protein
AT2G34910	8.37393	8.8308	9.16075	9.97555	8.57762	9.29565	9.21045	9.46644	3.90892e-07	2.53498e-05	protein_coding
AT2G34930	8.65347	10.0652	8.97022	10.912	9.0987	9.57473	9.56475	11.1636	0.459461	0.0358616	protein_coding	disease resistance family protein / LRR family protein
AT2G35290	6.31633	6.93694	6.7033	8.4372	6.41522	6.27251	6.62421	8.51396	0.0137986	5.90033e-06	protein_coding
AT2G35730	6.10313	6.61871	6.9491	8.13535	6.55823	6.92452	7.09362	8.07116	0.00087438	1.72325e-08	protein_coding	Heavy metal transport/detoxification superfamily protein
AT2G36270	7.53983	8.73867	9.19256	10.8975	7.41765	8.34084	8.69815	10.7306	0.0954115	4.30202e-05	protein_coding	Basic-leucine zipper (bZIP) transcription factor family protein
AT2G36380	11.8804	12.5024	12.5765	13.0787	12.1473	12.6467	12.3356	13.071	0.000327623	2.45989e-11	protein_coding	pleiotropic drug resistance 6
AT2G36540	7.17514	7.66216	7.54686	8.67439	6.95307	7.54682	7.81436	8.93873	1.30563e-08	0.0001824	protein_coding	Haloacid dehalogenase-like hydrolase (HAD) superfamily protein
AT2G36550	5.24866	5.45144	5.57513	6.30297	5.5287	5.76183	6.01943	6.67976	5.21207e-11	0.000637438	protein_coding
AT2G36590	9.53836	10.1657	9.96108	11.2809	8.94859	9.68875	9.62914	11.3032	0.00207064	1.96803e-06	protein_coding	proline transporter 3
AT2G36640	6.0966	10.6196	8.39313	10.9471	5.81501	9.76404	6.98108	10.3379	0.0682362	0.000355968	protein_coding	embryonic cell protein 63
AT2G36750	9.14664	9.64179	8.73587	10.8092	9.01924	10.0701	8.96729	11.2608	2.19551e-07	0.00194365	protein_coding	UDP-glucosyl transferase 73C1
AT2G36770	4.74265	6.84452	5.25988	7.5833	5.12747	6.33243	5.11805	8.42538	0.0546849	2.59448e-08	protein_coding	UDP-Glycosyltransferase superfamily protein
AT2G36780	4.83865	5.19748	5.69857	6.99565	5.08003	5.20609	5.267	7.9854	0.111792	0.000398207	protein_coding	UDP-Glycosyltransferase superfamily protein
AT2G36792	6.81986	6.66405	7.35714	7.78918	6.67242	6.36918	7.04089	8.15532	0.583562	0.00201195	other_rna	other RNA
AT2G36895	8.67792	9.43867	8.77271	9.79688	8.63836	9.22274	8.92403	10.0825	1.33048e-09	9.07081e-10	protein_coding
AT2G37040	13.2025	13.5596	13.494	14.0185	12.856	13.4229	13.211	13.6824	9.74661e-05	0.0197156	protein_coding	PHE ammonia lyase 1
AT2G37150	9.2163	10.0045	9.55192	10.4519	9.32507	9.99636	9.56578	10.5235	0.263536	0.0080397	protein_coding	RING/U-box superfamily protein
AT2G37478	6.67783	7.10629	7.23513	7.44614	6.90834	7.251	7.17236	7.77178	7.87559e-07	4.68392e-07	protein_coding	conserved peptide upstream open reading frame 52
AT2G37678	7.46485	7.60943	7.97395	8.31125	7.77693	7.98306	8.1602	8.51033	0.0306614	1.05287e-09	protein_coding	far-red elongated hypocotyl 1
AT2G37760	12.5715	13.004	12.7317	13.5406	12.9964	13.4683	12.9888	13.8497	5.87721e-09	4.80226e-11	protein_coding	NAD(P)-linked oxidoreductase superfamily protein
AT2G37970	12.7843	13.455	13.133	14.3007	12.7518	13.1686	12.9455	14.2514	3.71378e-07	8.25203e-07	protein_coding	SOUL heme-binding family protein
AT2G38250	6.06421	7.82365	6.40619	8.40104	6.13732	7.69979	6.50719	8.7473	0.000142935	1.04143e-08	protein_coding	Homeodomain-like superfamily protein
AT2G38465	5.26397	5.38252	5.50812	6.47021	5.11361	5.1536	5.29225	6.06961	0.00758198	0.0205973	protein_coding
AT2G38760	9.51963	10.5939	10.3265	10.8343	9.88427	10.595	10.2752	10.7676	0.00912641	9.76253e-05	protein_coding	annexin 3
AT2G38900	4.75125	4.68749	5.10289	4.89231	4.79524	4.89454	5.11873	6.30951	8.8717e-06	1.76461e-05	protein_coding	Serine protease inhibitor, potato inhibitor I-type family protein
AT2G38905	5.44372	7.32165	6.33582	8.19003	5.37678	6.58134	6.24272	7.70899	0.212226	2.26481e-05	protein_coding	Low temperature and salt responsive protein family
AT2G39050	9.70871	10.9509	10.5895	12.0041	9.02539	9.91719	9.67818	11.5249	1.76527e-07	8.64932e-10	protein_coding	hydroxyproline-rich glycoprotein family protein
AT2G39210	11.831	11.9952	11.5575	12.2946	11.8617	12.2325	11.821	12.8031	0.00787089	5.07601e-05	protein_coding	Major facilitator superfamily protein
AT2G39420	9.75925	10.3094	10.4943	10.643	9.74602	10.3878	9.62976	10.4304	8.48657e-11	0.00801021	protein_coding	alpha/beta-Hydrolases superfamily protein
AT2G39570	10.3905	10.7219	10.8208	11.2902	10.3564	10.8458	10.7746	11.5221	0.420247	0.00211487	protein_coding	ACT domain-containing protein
AT2G40340	6.8834	6.91736	7.32386	7.96186	6.76283	6.47554	7.1047	7.74573	0.531037	4.08544e-05	protein_coding	Integrase-type DNA-binding superfamily protein
AT2G40880	12.32	12.4998	12.3374	12.9466	12.6065	12.7332	13.1737	13.5469	1.04744e-05	3.05044e-06	protein_coding	cystatin A
AT2G41070	8.12081	8.67254	8.61021	9.13533	8.5769	9.15783	8.92087	9.44673	0.500013	5.47419e-07	protein_coding	Basic-leucine zipper (bZIP) transcription factor family protein
AT2G41260	5.14552	5.09693	6.09709	7.32268	5.02955	4.8838	5.40501	5.01284	2.0148e-07	0.000103989	protein_coding	glycine-rich protein / late embryogenesis abundant protein (M17)
AT2G41280	5.34445	6.59007	6.32182	6.94737	5.93543	6.55039	5.67343	6.59183	0.000137131	0.00369251	protein_coding	late embryogenesis abundant protein (M10) / LEA protein M10
AT2G41312	9.47088	9.75636	9.73613	10.3714	9.69041	10.02	10.1	10.8887	0.0880992	1.64602e-05	other_rna	other RNA
AT2G41420	13.0885	13.5611	13.1408	13.9809	13.3052	13.6072	13.3581	14.1304	0.000491963	0.000582465	protein_coding	proline-rich family protein
AT2G41810	7.03896	8.08228	6.50433	10.9846	6.82048	8.87171	6.36569	10.635	4.98682e-05	2.24318e-05	protein_coding	Protein of unknown function, DUF642
AT2G41905	10.6033	11.025	11.3764	11.6322	10.173	10.3284	10.9492	11.5566	9.03763e-07	0.000566317	protein_coding
AT2G42200	7.80457	8.32981	8.33013	8.52838	7.26869	7.7532	8.41369	8.6582	0.447477	2.84996e-05	protein_coding	squamosa promoter binding protein-like 9
AT2G42360	8.82676	9.44138	8.91805	9.68336	8.82112	9.28219	8.99009	10.0987	3.48707e-07	0.000107681	protein_coding	RING/U-box superfamily protein
AT2G42890	9.03684	9.65616	9.59108	10.5142	9.03621	9.56837	9.45548	10.4006	0.00363402	2.11041e-05	protein_coding	MEI2-like 2
AT2G43010	12.294	12.858	12.5467	13.1947	12.4043	12.9864	12.7966	13.4561	0.000252995	0.000195967	protein_coding	phytochrome interacting factor 4
AT2G43330	10.1822	10.9101	10.1977	11.1983	10.1514	10.8718	10.2393	11.3717	2.19856e-07	1.08784e-05	protein_coding	inositol transporter 1
AT2G43500	9.29546	10.2242	9.61221	10.5831	9.05609	9.88935	9.18804	10.4154	8.47641e-06	1.17442e-08	protein_coding	Plant regulator RWP-RK family protein
AT2G43530	10.1355	10.0865	10.4998	11.0922	10.5234	10.6337	10.6385	11.2017	0.0824464	3.3152e-08	protein_coding	Scorpion toxin-like knottin superfamily protein
AT2G43890	4.89261	6.16051	5.28572	8.77493	4.95993	6.69916	5.05425	8.51687	6.40351e-05	0.00107452	protein_coding	Pectin lyase-like superfamily protein
AT2G44470	4.91359	4.71144	4.93209	5.08385	4.93282	4.85456	5.6897	5.87676	0.54661	3.69639e-07	protein_coding	beta glucosidase 29
AT2G44810	5.21699	5.47161	4.88616	6.32159	4.93463	4.85456	4.69502	6.09387	1.02642e-07	0.000386847	protein_coding	alpha/beta-Hydrolases superfamily protein
AT2G44910	7.20789	7.92281	7.85647	8.15495	7.21546	7.6502	8.02581	8.27007	0.000227146	0.000201079	protein_coding	homeobox-leucine zipper protein 4
AT2G45220	10.1912	10.8093	10.8867	12.1343	10.1354	10.117	10.2982	11.347	1.37411e-07	2.37925e-08	protein_coding	Plant invertase/pectin methylesterase inhibitor superfamily
AT2G45360	7.14722	8.33318	8.31902	8.94229	7.48631	8.77186	8.479	8.99106	9.98201e-06	3.22801e-08	protein_coding	Protein of unknown function (DUF1442)
AT2G45570	6.47118	7.39974	5.57418	8.16204	5.6764	6.06865	5.29377	7.91549	0.925181	0.000127061	protein_coding	cytochrome P450, family 76, subfamily C, polypeptide 2
AT2G45660	9.0384	9.1933	9.09856	9.79206	9.55221	9.67817	10.0202	10.7165	0.825499	0.00184722	protein_coding	AGAMOUS-like 20
AT2G45820	13.2401	13.9751	13.4897	14.5419	13.3165	13.9899	13.5732	14.5009	0.000527477	1.8044e-05	protein_coding	Remorin family protein
AT2G45960	11.5259	12.6157	12.0316	13.4057	11.3951	12.5343	11.9539	13.2861	7.32839e-05	0.00111799	protein_coding	plasma membrane intrinsic protein 1B
AT2G46370	11.8224	12.5471	12.1561	13.0821	11.8549	12.5063	12.0302	13.2285	0.675083	1.09767e-06	protein_coding	Auxin-responsive GH3 family protein
AT2G46800	13.5882	13.9545	13.8325	14.5157	13.5067	13.9459	13.7741	14.4767	8.93784e-06	3.81909e-05	protein_coding	zinc transporter of Arabidopsis thaliana
AT2G46830	11.0237	11.6808	11.3069	12.2382	11.2212	11.9139	11.7519	12.7816	0.521014	2.53542e-06	protein_coding	circadian clock associated 1
AT2G46950	5.43918	5.64918	7.05597	7.85901	5.39317	5.5242	6.04119	6.6381	1.02886e-08	0.00307804	protein_coding	cytochrome P450, family 709, subfamily B, polypeptide 2
AT2G47140	10.8128	10.8861	11.1825	11.8903	10.9409	11.3448	10.9748	11.8219	0.151625	4.06789e-05	protein_coding	NAD(P)-binding Rossmann-fold superfamily protein
AT2G47270	8.44962	8.71378	8.67531	9.97815	8.38067	9.00504	8.945	9.90464	3.34637e-05	1.27574e-12	protein_coding	sequence-specific DNA binding transcription factors;transcription regulators
AT2G47485	10.509	11.354	10.6823	12.5276	10.4507	11.4058	10.4441	12.8241	0.000117706	0.00149189	protein_coding
AT2G47600	10.4355	10.9111	10.7969	11.5389	10.2687	10.5833	10.7133	11.4316	0.014602	1.50158e-07	protein_coding	magnesium/proton exchanger
AT2G47720	6.64016	7.02894	7.48317	7.40341	6.84094	6.94172	7.08605	7.91801	0.0217869	6.33083e-10	protein_coding
AT2G47780	10.9349	12.8209	14.5228	15.805	11.6408	13.2085	14.6717	16.1986	3.84529e-06	1.24589e-05	protein_coding	Rubber elongation factor protein (REF)
AT2G47800	7.27191	7.87391	7.85684	8.60758	7.50355	8.38338	7.68094	8.60899	1.93783e-05	0.000598848	protein_coding	multidrug resistance-associated protein 4
AT3G01472	7.17643	7.4351	7.71782	8.29858	7.33018	7.71641	7.96871	8.28522	6.41185e-07	0.00641484	protein_coding	conserved peptide upstream open reading frame 33
AT3G01970	7.39871	8.45949	8.55997	9.80897	7.81795	8.46727	8.50926	9.55771	5.81243e-05	6.9047e-10	protein_coding	WRKY DNA-binding protein 45
AT3G01990	6.779	6.93149	7.56594	7.791	6.63635	6.56735	6.9438	7.24397	3.43858e-10	0.00509222	protein_coding	ACT domain repeat 6
AT3G02480	8.85466	13.7949	11.6014	14.7712	8.55994	12.5475	10.0269	14.4724	0.323757	2.56608e-08	protein_coding	Late embryogenesis abundant protein (LEA) family protein
AT3G03170	10.2338	11.7956	11.0457	12.7667	10.1075	11.7304	10.8023	13.0606	0.0275293	0.0294302	protein_coding
AT3G03660	5.36092	5.67128	6.30159	5.98023	5.36033	5.94617	6.0532	6.65859	0.0112907	2.30016e-08	protein_coding	WUSCHEL related homeobox 11
AT3G03990	11.6668	12.3611	12.0275	13.1461	11.9169	12.375	12.324	13.1855	4.62507e-05	1.68444e-05	protein_coding	alpha/beta-Hydrolases superfamily protein
AT3G04410	6.39199	7.36703	7.25051	8.3237	6.87212	7.75031	7.54426	8.43249	0.0876217	3.88576e-05	protein_coding	NAC (No Apical Meristem) domain transcriptional regulator superfamily protein
AT3G05300	5.13633	5.09901	5.16796	6.06523	4.89286	5.09307	5.22887	5.26364	0.0697942	1.54661e-06	protein_coding	Cytidine/deoxycytidylate deaminase family protein
AT3G06850	6.66244	7.58231	6.88632	8.14916	6.72723	7.46879	7.24057	8.13731	0.0729345	0.0327834	protein_coding	2-oxoacid dehydrogenases acyltransferase family protein
AT3G08885	5.85271	5.67641	6.3122	6.9283	5.85211	5.48878	5.96119	6.7085	0.000318123	6.20751e-11	pseudogene
AT3G09770	11.2358	11.7571	11.6022	12.4049	11.3493	12.0502	11.6415	12.816	0.178738	0.0265801	protein_coding	RING/U-box superfamily protein
AT3G10250	7.83449	8.35423	8.0855	8.76545	7.8111	8.40315	8.10093	9.02313	0.694463	0.00318515	protein_coding	Plant protein 1589 of unknown function
AT3G10912	11.0437	11.3239	11.5162	12.6121	11.1879	11.335	11.3977	12.9267	0.00186934	0.0081056	protein_coding	conserved peptide upstream open reading frame 63
AT3G10985	13.8011	14.2743	14.5793	15.2755	14.1297	14.3789	14.7592	15.3005	0.179092	1.61391e-05	protein_coding	senescence associated gene 20
AT3G11130	7.88134	8.54037	8.28928	8.94203	8.33445	8.92176	8.58471	9.21746	0.621951	0.00158518	protein_coding	Clathrin, heavy chain
AT3G11415	5.09263	5.39021	5.27553	5.73661	4.94506	5.39861	5.09912	6.43656	2.31887e-07	0.001451	other_rna
AT3G11580	8.60231	9.17799	9.98554	10.2756	8.39835	8.84644	9.2531	10.3175	0.888391	8.36153e-12	protein_coding	AP2/B3-like transcriptional factor family protein
AT3G12510	10.1337	10.4663	10.5818	11.4934	10.1271	10.5198	10.2385	11.2858	0.0103785	1.30971e-11	protein_coding	MADS-box family protein
AT3G12955	8.1412	8.69434	8.46127	9.293	8.28893	8.74318	8.8754	9.84563	1.50971e-05	1.25391e-09	protein_coding	SAUR-like auxin-responsive protein family
AT3G12960	5.18486	6.34414	6.15875	7.38649	5.28902	6.18205	5.81304	7.38139	0.00744626	0.00386915	protein_coding
AT3G13061	5.89622	5.82086	6.21153	5.98542	5.95618	5.85611	6.87238	7.0603	6.83915e-07	1.76691e-06	other_rna	other RNA
AT3G13620	10.0314	10.7591	10.6393	11.311	10.2178	10.7615	10.6092	11.5068	4.84189e-09	2.03723e-05	protein_coding	Amino acid permease family protein
AT3G13910	10.51	10.5596	10.7915	11.3434	10.7562	10.7806	10.9108	11.5587	0.00133132	0.000200872	protein_coding	Protein of unknown function (DUF3511)
AT3G14050	10.9872	11.9794	11.3201	12.2603	10.999	11.9809	11.3264	12.683	0.000193198	0.00101665	protein_coding	RELA/SPOT homolog 2
AT3G14060	8.483	8.97742	9.0233	10.3707	8.78566	9.31788	9.15114	10.5999	0.382933	0.000134044	protein_coding
AT3G14067	13.343	14.8279	13.8691	15.268	13.1803	14.6947	13.7346	15.2049	2.74451e-09	0.00257304	protein_coding	Subtilase family protein
AT3G14070	8.22395	8.89884	8.81903	9.16617	7.92877	8.42163	8.35781	8.89562	0.306984	2.5485e-07	protein_coding	cation exchanger 9
AT3G14362	9.28012	10.0687	10.3438	10.3624	9.45311	10.6606	10.1831	10.4997	4.6783e-11	2.39034e-14	protein_coding	ROTUNDIFOLIA like 10
AT3G14395	6.55424	7.86765	7.11189	7.93887	6.7457	7.35021	7.13706	7.50092	0.0490395	0.0173977	protein_coding
AT3G14595	10.9094	11.7681	11.2991	12.6008	10.8122	11.6099	11.3582	12.8455	0.393987	7.42094e-05	protein_coding	Ribosomal protein L18ae family
AT3G14630	5.92153	6.18403	6.02918	6.48087	6.66528	6.7068	6.73178	7.25219	1.90483e-06	1.63735e-07	protein_coding	cytochrome P450, family 72, subfamily A, polypeptide 9
AT3G14690	9.08127	9.42613	8.97735	9.84565	9.46362	9.67318	9.28941	10.1348	0.000756115	1.48599e-11	protein_coding	cytochrome P450, family 72, subfamily A, polypeptide 15
AT3G14810	6.54507	7.86672	6.57035	8.30928	6.33375	7.75521	6.72969	8.64581	2.87273e-12	3.60886e-05	protein_coding	mechanosensitive channel of small conductance-like 5
AT3G15280	5.42921	5.95557	6.57178	8.26118	5.34303	6.30977	6.24854	6.61036	2.28239e-07	1.78276e-05	protein_coding
AT3G15450	12.4472	14.0376	13.4046	15.2511	11.9153	13.4356	13.403	15.1667	4.99435e-05	1.18685e-05	protein_coding	Aluminium induced protein with YGL and LRDR motifs
AT3G15500	5.97071	8.95176	7.35836	11.1933	6.23353	8.95904	7.68705	11.6736	0.0435112	0.00581175	protein_coding	NAC domain containing protein 3
AT3G15510	7.19745	7.7546	8.92632	8.98316	8.69031	9.20986	9.62023	9.75443	9.31737e-06	4.32575e-07	protein_coding	NAC domain containing protein 2
AT3G15534	5.73169	7.85524	6.47131	9.9879	5.90689	7.85435	6.33729	10.214	6.77087e-10	0.000150751	protein_coding
AT3G15630	9.29846	9.96389	10.4848	10.8312	9.38471	10.0643	10.2847	11.2159	8.27011e-05	4.16744e-07	protein_coding
AT3G15670	7.5528	10.7727	10.2719	12.16	7.21086	9.22908	8.75361	10.565	3.61167e-05	0.000124414	protein_coding	Late embryogenesis abundant protein (LEA) family protein
AT3G15790	8.4154	9.25433	8.87749	9.67863	8.49019	9.01561	8.85828	9.7772	0.000703852	1.31041e-05	protein_coding	methyl-CPG-binding domain 11
AT3G16175	8.44442	8.62752	8.62829	8.94194	7.98301	8.36468	9.05395	9.46334	0.792823	1.83842e-05	protein_coding	Thioesterase superfamily protein
AT3G16910	11.5518	12.3069	11.7635	12.8867	11.66	12.5103	11.8047	13.0775	0.823781	1.778e-10	protein_coding	acyl-activating enzyme 7
AT3G17480	5.25027	4.98091	5.06467	6.08236	4.98414	5.18745	5.11767	4.98199	0.493982	2.00816e-05	protein_coding	F-box and associated interaction domains-containing protein
AT3G17520	4.87467	7.76568	6.49966	8.62587	5.41328	6.82965	6.32478	7.90626	0.0743235	1.60035e-11	protein_coding	Late embryogenesis abundant protein (LEA) family protein
AT3G17800	7.00561	7.30755	7.00182	7.59707	7.15927	7.30412	7.27966	8.14214	1.26474e-09	1.36557e-08	protein_coding	Protein of unknown function (DUF760)
AT3G17860	8.84185	10.2241	9.65405	10.7122	9.14199	9.9122	9.39618	10.6706	0.581653	4.32616e-05	protein_coding	jasmonate-zim-domain protein 3
AT3G17980	5.03861	5.77429	5.07343	6.03925	4.96736	5.79792	5.16674	6.36323	8.96286e-05	1.33826e-05	protein_coding	Calcium-dependent lipid-binding (CaLB domain) family protein
AT3G18773	7.18208	7.75586	7.65952	8.60531	7.23867	7.57711	7.40784	8.78417	0.460207	0.00316623	protein_coding	RING/U-box superfamily protein
AT3G19030	13.6561	14.4229	13.8781	14.5159	13.6102	14.2763	14.1046	14.9871	1.38811e-10	3.13504e-05	protein_coding
AT3G19100	10.5099	11.0357	10.655	11.4243	10.5302	11.1457	10.6935	11.5325	0.0800301	1.75146e-08	protein_coding	Protein kinase superfamily protein
AT3G19390	11.3746	12.1277	11.7837	12.6965	11.4703	12.2289	11.6307	12.4097	0.00662497	5.66681e-08	protein_coding	Granulin repeat cysteine protease family protein
AT3G19615	5.18921	5.89087	5.25159	6.10142	4.89569	5.78641	5.27193	6.39652	0.30443	1.71683e-09	protein_coding
AT3G20300	8.33821	9.91776	8.4393	10.5721	8.28826	9.90832	8.71407	10.7739	0.000432905	9.12413e-21	protein_coding	Protein of unknown function (DUF3537)
AT3G20500	10.8333	11.1825	10.8312	11.756	11.0453	11.3211	11.134	11.8869	3.84819e-13	0.000534409	protein_coding	purple acid phosphatase 18
AT3G20660	8.73155	9.1853	9.19154	10.2397	8.72004	8.85578	8.96791	10.1267	1.14004e-05	1.98917e-08	protein_coding	organic cation/carnitine transporter4
AT3G21070	7.86204	8.79601	8.14839	9.32227	7.88768	8.35877	8.02505	9.28848	0.141925	7.72527e-11	protein_coding	NAD kinase 1
AT3G21090	9.29591	9.83815	10.2933	10.8597	9.13789	9.72856	10.1396	11.0446	3.9695e-07	2.40727e-14	protein_coding	ABC-2 type transporter family protein
AT3G21370	4.96212	4.88101	8.06353	9.18225	5.42456	5.6431	6.89586	7.0039	2.61123e-09	0.000853644	protein_coding	beta glucosidase 19
AT3G21680	8.39895	8.94041	8.82325	9.6531	8.34631	9.22069	8.52963	9.43525	0.369827	0.000587359	protein_coding
AT3G21780	6.66	7.8343	6.90119	8.41634	6.50592	7.28625	6.60395	8.69875	0.000263223	9.71524e-07	protein_coding	UDP-glucosyl transferase 71B6
AT3G22490	4.93497	5.2344	5.99522	8.10762	5.00634	5.52023	5.52889	5.64914	1.01868e-05	1.06012e-05	protein_coding	Seed maturation protein
AT3G22500	4.81996	4.68065	5.04276	6.02738	4.74311	4.83924	4.79211	4.85956	0.0392615	0.000946238	protein_coding	Seed maturation protein
AT3G22550	12.5388	13.2017	13.3024	13.3256	12.8578	13.4951	13.5786	13.7966	3.46679e-08	0.00504883	protein_coding	Protein of unknown function (DUF581)
AT3G22840	9.82067	10.8793	11.3866	12.4843	9.89888	11.0562	11.3469	12.4796	3.85311e-05	5.11864e-15	protein_coding	Chlorophyll A-B binding family protein
AT3G23120	5.74281	6.50773	6.64272	7.67837	6.72907	7.23803	7.00204	7.87508	6.6383e-06	1.98657e-07	protein_coding	receptor like protein 38
AT3G23240	6.0492	10.3686	6.91318	11.5461	6.68887	10.449	7.80385	12.0225	0.000490116	3.3391e-09	protein_coding	ethylene response factor 1
AT3G23560	9.1672	9.28655	9.60089	10.1425	9.13676	9.2551	9.16123	9.97164	0.000922798	4.55385e-09	protein_coding	MATE efflux family protein
AT3G23910	9.9784	10.0732	10.5116	10.8024	9.76433	9.75884	10.3175	10.7169	2.40406e-05	0.00179668	protein_coding
AT3G26160	6.37467	6.239	6.86852	6.91748	6.14137	6.29087	7.32518	7.65096	0.0777857	0.0184365	protein_coding	cytochrome P450, family 71, subfamily B, polypeptide 17
AT3G26180	5.56935	5.63141	6.18464	6.10639	5.66947	5.69795	6.50254	6.81878	0.000870901	0.0394664	protein_coding	cytochrome P450, family 71, subfamily B, polypeptide 20
AT3G27250	5.39967	8.07286	6.94349	9.75675	5.15079	7.6102	5.9971	9.59015	3.39051e-06	0.0361623	protein_coding
AT3G27809	4.85904	5.22911	4.87365	6.13446	5.08478	5.27974	4.99434	5.51726	0.631483	0.00384894	protein_coding
AT3G27870	8.55169	9.29293	9.09438	10.1086	8.31761	9.21054	9.04545	10.342	7.93644e-07	0.00432746	protein_coding	ATPase E1-E2 type family protein / haloacid dehalogenase-like hydrolase family protein
AT3G28007	5.68135	7.50843	5.67713	9.28689	5.79056	7.50742	6.20868	9.78607	0.783362	6.26804e-07	protein_coding	Nodulin MtN3 family protein
AT3G28270	10.2752	10.8271	11.6928	13.058	10.0228	10.5299	11.2497	12.6331	1.17277e-07	0.0228643	protein_coding	Protein of unknown function (DUF677)
AT3G44560	10.4487	10.7361	11.4437	12.348	10.4354	10.3086	12.2046	12.9858	3.52354e-05	0.00195272	protein_coding	fatty acid reductase 8
AT3G45285	5.05157	5.14139	5.0535	5.92577	4.88287	4.85089	5.14709	5.1063	4.33807e-08	1.99619e-06	protein_coding	ECA1 gametogenesis related family protein
AT3G45300	5.1532	5.8848	5.4086	7.05294	5.28913	5.54429	5.72914	7.4871	0.145482	0.0172566	protein_coding	isovaleryl-CoA-dehydrogenase
AT3G48115	11.4421	12.0474	11.8045	12.3089	11.5335	12.1278	11.9175	12.6842	0.0157582	0.000291256	other_rna	other RNA
AT3G48920	9.51644	9.44917	10.0753	10.3904	9.03704	9.05546	9.43197	10.0718	1.11614e-05	0.0139629	protein_coding	myb domain protein 45
AT3G49570	9.92871	11.9367	11.4794	12.5842	10.1784	11.78	10.8803	12.3291	2.17728e-06	0.000689077	protein_coding	response to low sulfur 3
AT3G53540	9.45203	9.61396	9.70924	10.4591	9.78079	9.9932	10.0193	10.5734	2.31776e-09	3.50581e-08	protein_coding
AT3G55070	10.2404	10.5333	10.5103	11.0789	10.5499	10.8318	10.7582	11.2686	0.930397	4.75351e-09	protein_coding	LisH/CRA/RING-U-box domains-containing protein
AT3G56400	9.01805	8.51386	9.29073	10.011	10.0581	9.51588	9.49414	10.3783	0.742823	1.34354e-05	protein_coding	WRKY DNA-binding protein 70
AT3G57380	8.03107	8.92027	8.48904	9.66542	7.93755	9.28454	8.20646	9.91446	0.00160354	2.3645e-08	protein_coding	Glycosyltransferase family 61 protein
AT3G57460	5.74627	6.62966	5.8243	7.33435	5.71575	5.68238	5.80478	6.89508	0.000182821	8.73761e-07	protein_coding	catalytics;metal ion binding
AT3G57680	6.55006	7.06742	7.41873	8.22237	5.67945	6.21075	7.35532	7.9909	0.00115307	5.90709e-07	protein_coding	Peptidase S41 family protein
AT3G57740	5.7787	6.92682	6.43362	7.03917	5.94236	7.08566	6.24206	7.16951	0.116422	1.64718e-06	protein_coding	Protein kinase superfamily protein
AT3G57760	7.4577	8.55457	7.5502	9.05101	7.62813	8.63243	7.79839	9.65754	0.000235867	0.0358771	protein_coding	Protein kinase superfamily protein
AT3G57770	9.27085	9.47373	9.49186	9.8035	8.92976	9.31316	9.60682	10.1121	5.24513e-06	3.17874e-07	protein_coding	Protein kinase superfamily protein
AT3G57880	11.5213	12.6489	12.3115	13.164	11.5732	12.5663	12.2607	13.0179	0.743633	0.000250092	protein_coding	Calcium-dependent lipid-binding (CaLB domain) plant phosphoribosyltransferase family protein
AT3G58310	7.02041	7.42757	6.91893	7.20975	7.47318	7.25762	7.98581	8.47672	2.36586e-05	4.17434e-08	protein_coding	Domain of unknown function (DUF26)
AT3G59210	9.7668	10.1517	10.1776	10.7654	9.89638	10.1235	10.254	10.7994	0.00118542	6.11132e-08	protein_coding	F-box/RNI-like superfamily protein
AT3G59480	7.87466	8.94784	7.9327	10.4646	7.73343	9.45252	7.55076	10.857	0.545053	0.0043215	protein_coding	pfkB-like carbohydrate kinase family protein
AT3G59610	5.30283	5.10669	5.00556	5.9968	4.96874	4.89834	5.52031	5.04578	0.377821	0.0101001	protein_coding	F-box family protein / jacalin lectin family protein
AT3G59880	7.79228	7.93634	7.94033	8.90061	8.20796	8.26051	8.34232	9.21854	0.0493162	0.0165545	protein_coding
AT3G59940	12.1654	12.9108	12.8687	13.6159	12.1013	12.7351	13.0604	14.0078	0.0013696	0.00657457	protein_coding	Galactose oxidase/kelch repeat superfamily protein
AT3G60930	9.35049	10.3148	9.1075	10.2474	9.46749	10.4826	10.8124	12.5559	0.452969	6.06093e-14	transposable_element_gene	transposable element gene
AT3G61160	8.01274	8.23973	9.0759	9.50801	7.80097	7.84471	8.54207	9.07881	4.93042e-08	0.00291601	protein_coding	Protein kinase superfamily protein
AT3G61430	15.3142	16.0945	15.5429	16.4939	15.2549	16.0357	15.4179	16.5699	0.815014	1.18993e-10	protein_coding	plasma membrane intrinsic protein 1A
AT3G61750	7.96803	8.28088	8.20418	8.69484	7.68861	8.14244	8.20253	8.64036	0.268594	3.77434e-07	protein_coding	Cytochrome b561/ferric reductase transmembrane with DOMON related domain
AT3G61840	5.35422	5.00823	4.91381	5.90958	5.22978	4.78755	5.10026	5.01482	7.07127e-09	9.14495e-08	protein_coding	Protein of unknown function (DUF688)
AT3G62740	8.15117	8.70399	8.74371	9.59087	8.42405	8.87859	9.03468	9.70608	1.18662e-09	0.0206063	protein_coding	beta glucosidase 7
AT3G62950	4.90393	5.4096	5.49048	7.20042	4.98463	5.52343	5.41654	6.89384	3.78308e-06	0.00350251	protein_coding	Thioredoxin superfamily protein
AT3G63040	4.97107	5.08471	5.93206	7.15116	5.20273	5.22656	7.11087	7.79206	0.00805485	0.00022083	protein_coding
AT4G01010	6.5698	7.76107	7.0327	7.94666	6.92067	7.75532	7.2837	8.35308	0.479596	0.00352993	protein_coding	cyclic nucleotide-gated channel 13
AT4G01026	6.71254	8.51465	6.988	8.8229	6.65826	8.61131	7.34982	9.80079	0.000216995	0.0383819	protein_coding	PYR1-like 7
AT4G01070	10.6316	11.4298	11.1856	12.298	10.5757	11.4927	11.116	12.3162	1.62596e-05	3.45425e-05	protein_coding	UDP-Glycosyltransferase superfamily protein
AT4G01120	11.1368	11.7166	11.8419	12.2436	11.421	11.8348	11.7675	12.4783	0.00182227	4.2515e-05	protein_coding	G-box binding factor 2
AT4G01170	6.47598	7.44522	6.94612	7.52156	6.42187	6.93337	6.73101	7.30666	0.0483284	0.0308266	protein_coding
AT4G01985	6.02752	9.0722	6.61317	9.44946	6.74162	8.35153	8.18251	10.1853	0.109257	0.0118505	protein_coding
AT4G02170	6.48869	7.53444	7.78886	8.2207	6.70592	6.83755	6.92973	8.41954	0.0108324	3.24073e-07	protein_coding
AT4G03030	11.3986	12.0438	11.6813	12.338	11.5653	12.0615	11.8362	12.4128	0.359889	7.43154e-05	protein_coding	Galactose oxidase/kelch repeat superfamily protein
AT4G03820	9.32294	10.1444	9.97229	10.8525	9.44826	10.3776	9.86669	10.8251	4.20381e-05	0.0037979	protein_coding	Protein of unknown function (DUF3537)
AT4G05049	5.83175	5.93081	5.88661	6.14663	5.74338	5.84298	6.01604	6.82486	0.309715	0.0120218	pseudogene
AT4G05050	14.2114	14.9389	14.2999	15.4046	14.5144	15.1484	14.5791	15.5672	1.71656e-05	0.0016103	protein_coding	ubiquitin 11
AT4G05070	12.1602	12.8091	12.6301	12.9346	12.063	12.771	12.496	13.2032	0.000248867	0.000118596	protein_coding	Wound-responsive family protein
AT4G05076	5.00084	4.92401	4.8954	6.01957	4.71225	4.85006	4.65938	4.7262	0.017382	0.000116952	pseudogene
AT4G05110	8.16008	8.57739	8.13539	9.48332	8.07343	8.28786	8.41483	9.7169	3.66713e-08	0.000724273	protein_coding	equilibrative nucleoside transporter 6
AT4G06630	4.94341	4.9386	4.76816	5.65311	4.70705	4.5699	4.82781	4.83347	4.15722e-09	0.00831249	transposable_element_gene	transposable element gene
AT4G09600	4.96794	8.31875	7.89417	9.17386	5.35457	6.91	6.69435	7.45899	0.340733	0.00065351	protein_coding	GAST1 protein homolog 3
AT4G12290	8.67791	8.674	8.66464	9.51962	8.6689	8.83043	8.76626	9.76172	8.49093e-05	0.00362039	protein_coding	Copper amine oxidase family protein
AT4G13110	8.54693	9.60414	8.89598	10.1994	8.91458	9.71623	9.00842	10.3602	2.74824e-07	0.0496456	protein_coding	BSD domain-containing protein
AT4G13180	12.2211	13.0368	12.8557	13.7177	12.4435	13.497	12.7566	14.0625	4.87471e-05	0.000365172	protein_coding	NAD(P)-binding Rossmann-fold superfamily protein
AT4G13420	5.50499	5.79078	5.65559	6.43518	6.38203	6.64255	6.72252	7.41508	0.859513	3.53708e-08	protein_coding	high affinity K+ transporter 5
AT4G14690	14.2313	14.6735	14.6195	15.1696	13.7376	13.9084	14.7484	15.4439	8.0982e-05	1.04299e-05	protein_coding	Chlorophyll A-B binding family protein
AT4G14740	9.2639	9.45547	9.67627	10.0308	9.28509	9.69113	10.1514	10.641	0.0074557	1.03945e-05	protein_coding	Plant protein of unknown function (DUF828) with plant pleckstrin homology-like region
AT4G15230	8.07701	8.73654	9.33082	9.88564	7.97501	8.69342	8.37801	9.14251	3.17841e-05	0.0254194	protein_coding	pleiotropic drug resistance 2
AT4G15260	8.92557	10.0464	9.16364	10.5842	8.78254	9.71906	9.35471	11.0716	6.05013e-06	0.00333994	protein_coding	UDP-Glycosyltransferase superfamily protein
AT4G15990	5.37533	6.67137	5.74896	7.5147	5.18826	6.83758	5.5107	7.49199	1.96452e-07	2.86513e-06	protein_coding
AT4G16160	4.91429	5.13932	7.14187	7.71366	5.26245	5.25094	6.21339	6.91623	0.0510566	6.90583e-06	protein_coding	Mitochondrial import inner membrane translocase subunit Tim17/Tim22/Tim23 family protein
AT4G16190	13.609	14.8517	14.1257	15.5988	13.9423	15.0016	14.3767	15.9347	0.133716	0.00532862	protein_coding	Papain family cysteine protease
AT4G16442	10.8922	11.3934	10.9853	12.1881	10.7575	11.2095	11.2372	12.3581	0.40442	1.53223e-08	protein_coding	Uncharacterised protein family (UPF0497)
AT4G16520	13.0385	13.499	13.3934	13.774	13.104	13.4149	13.4057	14.0697	0.649053	2.64454e-07	protein_coding	Ubiquitin-like superfamily protein
AT4G17500	10.8075	12.8293	11.4775	13.7058	11.178	12.8456	11.6147	13.7109	0.000931701	1.26209e-05	protein_coding	ethylene responsive element binding factor 1
AT4G17840	10.0931	11.2213	10.3952	12.0898	10.2396	11.2172	10.7557	12.5403	0.407811	0.0312987	protein_coding
AT4G18140	9.23448	9.80774	9.64881	10.4771	9.50314	10.0354	9.95276	10.9662	2.08391e-05	0.0225326	protein_coding	SCP1-like small phosphatase 4b
AT4G18450	6.78747	7.96344	7.00436	8.56953	6.72104	8.31268	7.28265	8.85691	0.116883	0.0088336	protein_coding	Integrase-type DNA-binding superfamily protein
AT4G18650	7.16578	9.94261	7.26168	11.2827	7.07046	9.90227	8.07197	11.8228	0.00671801	0.016161	protein_coding	transcription factor-related
AT4G20710	4.92703	4.89977	4.93483	5.74156	4.91893	4.84203	4.79382	4.62423	6.37122e-06	4.66815e-05	pseudogene
AT4G20860	11.5575	12.9048	12.3224	13.5544	11.7747	12.9301	11.8969	13.2531	0.102374	2.10198e-05	protein_coding	FAD-binding Berberine family protein
AT4G21120	7.96175	9.40961	9.43904	11.0766	7.45908	8.86891	8.62604	10.6211	0.000383274	0.000591687	protein_coding	amino acid transporter 1
AT4G21366	5.81075	6.05971	5.98405	6.28132	6.32501	6.75993	6.67313	7.12002	0.0143863	2.41677e-06	protein_coding	Protein kinase superfamily protein
AT4G21500	6.41933	6.80076	6.67877	7.10855	6.80912	7.3511	7.10164	7.85878	0.0238563	0.00103276	protein_coding
AT4G22214	8.36984	10.9139	9.67782	10.7786	8.32759	10.5479	9.2722	10.254	1.67262e-05	0.0239409	protein_coding	Defensin-like (DEFL) family protein
AT4G22470	9.22496	9.35702	8.81169	9.39909	9.55164	9.44249	10.1272	10.5002	3.69571e-10	0.00153228	protein_coding	protease inhibitor/seed storage/lipid transfer protein (LTP) family protein
AT4G22690	11.5775	11.4677	11.2281	12.0454	12.0162	11.6693	12.0725	12.4282	0.317895	0.0229835	protein_coding	cytochrome P450, family 706, subfamily A, polypeptide 1
AT4G22745	12.0254	12.5022	12.3048	12.9458	12.1544	12.5511	12.4344	13.0771	0.000779804	0.0110372	protein_coding	methyl-CPG-binding domain 1
AT4G22920	10.6096	11.07	10.6074	11.5388	10.4581	11.1626	10.5172	11.8803	0.282488	0.026321	protein_coding	non-yellowing 1
AT4G23450	8.14461	9.57991	8.95865	10.645	8.18285	9.51051	8.86208	10.3715	7.38845e-08	1.59755e-07	protein_coding	RING/U-box superfamily protein
AT4G24230	9.37318	9.64147	9.74313	10.3428	9.26608	9.53569	9.72676	10.6052	0.000139395	7.48124e-12	protein_coding	acyl-CoA-binding domain 3
AT4G24510	11.8144	11.7739	11.3701	12.4833	11.6545	11.8086	11.8533	12.5859	1.52003e-05	0.0423272	protein_coding	HXXXD-type acyl-transferase family protein
AT4G25580	6.52995	6.66842	7.09179	8.92417	6.21098	6.30285	6.82256	8.22137	3.87741e-06	0.00198462	protein_coding	CAP160 protein
AT4G25690	10.345	10.841	10.5322	11.9315	10.4025	10.6944	10.5557	12.0868	2.00913e-06	0.000216001	protein_coding
AT4G26270	9.21331	9.42621	9.98503	10.1968	8.95957	8.89149	9.28	9.60938	3.03584e-07	0.000236353	protein_coding	phosphofructokinase 3
AT4G26400	10.4668	10.923	10.6664	11.2464	10.9697	11.2462	10.9982	11.4755	0.791839	3.4732e-06	protein_coding	RING/U-box superfamily protein
AT4G27160	5.2958	5.17051	6.17054	6.43021	5.15786	5.32907	6.57014	7.70297	1.50748e-08	1.11854e-05	protein_coding	seed storage albumin 3
AT4G28350	6.87256	8.16644	7.32265	8.81952	6.87865	7.4279	7.32027	8.99609	0.0011683	6.19488e-05	protein_coding	Concanavalin A-like lectin protein kinase family protein
AT4G28490	7.73433	8.23035	7.41305	8.48472	8.33657	8.39862	8.2234	9.13502	3.57507e-07	0.000692231	protein_coding	Leucine-rich receptor-like protein kinase family protein
AT4G28703	6.25007	8.44716	6.79376	8.68072	6.09132	7.78624	6.64849	9.24927	0.000276349	0.000190906	protein_coding	RmlC-like cupins superfamily protein
AT4G29160	13.1915	13.8425	13.3616	14.0861	13.3821	13.9278	13.4503	14.3116	9.17576e-05	0.00877412	protein_coding	SNF7 family protein
AT4G30490	10.7928	11.3751	11.2159	11.861	10.8629	11.2949	11.0645	12.048	0.309217	0.0109767	protein_coding	AFG1-like ATPase family protein
AT4G30960	13.6704	14.5176	14.1284	15.0651	13.64	14.3358	14.1072	15.0828	3.90962e-07	0.00996306	protein_coding	SOS3-interacting protein 3
AT4G31380	5.12768	5.44809	5.60239	7.6793	4.84234	5.13736	5.83067	8.20462	8.81305e-07	0.00496751	protein_coding	FPF1-like protein 1
AT4G32770	10.2652	11.076	10.4044	11.3085	9.82647	10.5334	9.95779	11.1174	0.132838	5.58052e-11	protein_coding	tocopherol cyclase, chloroplast / vitamin E deficient 1 (VTE1) / sucrose export defective 1 (SXD1)
AT4G32810	6.80067	7.18829	7.84506	7.56139	6.68443	7.67059	7.00227	7.08639	0.000177182	0.0137717	protein_coding	carotenoid cleavage dioxygenase 8
AT4G33040	9.65532	10.3175	10.5021	11.3069	9.78358	10.365	10.5621	11.2126	4.20651e-06	0.0256624	protein_coding	Thioredoxin superfamily protein
AT4G33540	9.5377	10.014	9.26952	10.2706	9.01558	9.29609	9.28645	10.4301	0.00461465	2.42783e-07	protein_coding	metallo-beta-lactamase family protein
AT4G33700	5.85811	6.50729	5.75543	6.98133	5.72848	6.61057	5.79495	7.28969	0.082104	0.0432156	protein_coding	CBS domain-containing protein with a domain of unknown function (DUF21)
AT4G33950	10.3818	10.7747	11.0175	11.1338	10.2402	10.6672	10.7558	11.3793	0.265303	1.8343e-06	protein_coding	Protein kinase superfamily protein
AT4G34230	11.2691	12.1122	11.9399	13.1369	11.5498	12.1422	11.9891	13.123	0.00117183	0.000103884	protein_coding	cinnamyl alcohol dehydrogenase 5
AT4G34380	6.53249	7.87513	7.16617	9.26621	7.18018	7.80012	7.57131	9.7003	0.000147022	0.00658728	protein_coding	Transducin/WD40 repeat-like superfamily protein
AT4G35110	9.43411	10.3154	9.66583	11.0476	9.6632	10.4221	9.80642	11.2635	4.0979e-06	2.70314e-05	protein_coding	Arabidopsis phospholipase-like protein (PEARLI 4) family
AT4G35140	8.82864	9.15734	9.05756	9.57621	9.39309	9.66959	9.38888	9.93618	4.44444e-07	0.00164253	protein_coding	Transducin/WD40 repeat-like superfamily protein
AT4G35290	6.94401	7.20044	7.42924	7.86714	6.78985	7.07994	7.33942	7.49062	0.00806072	0.00849869	protein_coding	glutamate receptor 2
AT4G36430	9.41231	8.90218	9.41183	9.99145	9.17292	9.71974	9.52329	10.0803	0.289999	8.54888e-05	protein_coding	Peroxidase superfamily protein
AT4G36700	7.97702	8.05431	6.7612	9.79552	6.46036	7.41464	7.26471	10.0138	0.00291024	5.6022e-06	protein_coding	RmlC-like cupins superfamily protein
AT4G36820	6.66265	7.81052	6.8516	8.914	6.46926	8.18068	6.72207	8.86348	0.00597728	0.0332792	protein_coding	Protein of unknown function (DUF607)
AT4G36900	9.26895	10.6161	9.99813	11.1373	9.45187	10.6562	10.0213	11.7962	0.149355	0.0031744	protein_coding	related to AP2 10
AT4G37070	9.43442	9.88052	10.4469	11.0477	9.67608	10.0727	10.2643	10.4837	0.635697	0.000537415	protein_coding	Acyl transferase/acyl hydrolase/lysophospholipase superfamily protein
AT4G37225	7.13244	8.63639	7.63281	8.96463	7.26705	8.67741	8.23157	9.8876	0.0688268	0.00145516	other_rna	other RNA
AT4G37610	9.22964	10.2025	10.1993	10.9811	9.18157	10.1948	10.1332	11.468	2.68853e-06	0.0200239	protein_coding	BTB and TAZ domain protein 5
AT4G38060	8.30737	8.97831	8.44044	9.393	8.40283	9.05114	8.54494	9.68009	1.88099e-06	8.92594e-08	protein_coding
AT4G38580	12.564	13.0434	13.2515	13.9545	12.4077	12.7459	13.1881	14.0309	2.12897e-05	0.000557401	protein_coding	farnesylated protein 6
AT4G38730	8.72179	9.22494	8.8158	9.64696	8.70882	9.16508	9.013	9.82736	2.74537e-05	0.00798421	protein_coding	Protein of unknown function (DUF803)
AT4G39090	8.8028	9.72376	9.29874	10.7636	8.71502	9.59148	9.03295	10.5679	0.467946	0.00883193	protein_coding	Papain family cysteine protease
AT4G39360	5.81705	7.91858	6.12975	8.3067	5.71705	7.60654	5.85195	8.79737	7.97866e-06	0.00135173	protein_coding
AT4G39480	9.89498	9.99986	10.8038	10.3963	10.0547	10.4386	10.4429	11.0994	2.76097e-05	0.00201493	protein_coding	cytochrome P450, family 96, subfamily A, polypeptide 9
AT4G40010	9.50961	10.4461	10.2872	11.7285	9.71615	10.5982	10.2638	11.9153	3.86097e-06	0.000426336	protein_coding	SNF1-related protein kinase 2.7
AT5G01260	9.85783	10.5843	10.039	10.7641	9.57567	10.3285	9.77648	10.7687	0.936818	0.00264801	protein_coding	Carbohydrate-binding-like fold
AT5G01520	8.79205	10.8986	9.23175	11.6756	8.89521	11.0472	9.27209	12.4103	0.0007074	0.00255993	protein_coding	RING/U-box superfamily protein
AT5G01670	7.99646	8.23713	8.21498	8.99194	7.71023	7.73563	7.87393	8.87323	1.58775e-08	0.0490338	protein_coding	NAD(P)-linked oxidoreductase superfamily protein
AT5G02160	11.2017	11.189	11.1043	11.4956	10.7872	10.7468	10.4089	11.8677	7.9627e-06	5.42546e-05	protein_coding
AT5G02170	5.91585	6.53578	6.58545	7.07366	6.21347	6.89377	6.6806	6.94106	1.16408e-09	1.89989e-05	protein_coding	Transmembrane amino acid transporter family protein
AT5G02620	9.78583	10.2105	10.2857	10.8829	10.0851	10.4313	10.3209	10.778	6.14158e-06	0.00801767	protein_coding	ankyrin-like1
AT5G03180	6.9351	7.22219	6.92006	7.48248	6.71447	6.95996	6.99342	7.76283	0.194326	0.0449328	protein_coding	RING/U-box superfamily protein
AT5G03230	10.981	11.7218	11.8924	12.5428	11.0361	12.0765	11.9515	13.1096	0.153688	5.20639e-10	protein_coding	Protein of unknown function, DUF584
AT5G04000	8.30551	9.37628	8.87987	9.64064	8.08873	8.96088	8.58974	9.37756	0.000108572	0.00953497	protein_coding
AT5G04250	8.16518	9.24144	8.23759	10.0702	8.05562	9.17236	8.2679	10.4789	0.0415555	0.00250221	protein_coding	Cysteine proteinases superfamily protein
AT5G05850	8.77751	9.3422	9.41789	9.91592	9.12219	9.57864	9.50036	10.1466	0.00974662	0.00065899	protein_coding	plant intracellular ras group-related LRR 1
AT5G05965	5.84923	6.32402	5.95498	7.28659	5.7727	5.96872	5.61047	7.44796	0.640935	0.0184398	protein_coding
AT5G06510	7.91394	8.75007	8.67393	8.9785	7.81775	8.7239	8.51497	8.71363	0.746507	1.49553e-09	protein_coding	nuclear factor Y, subunit A10
AT5G06860	12.685	13.3244	13.107	14.0979	12.661	13.1471	12.8973	14.1691	4.13387e-05	0.0339391	protein_coding	polygalacturonase inhibiting protein 1
AT5G06865	6.3323	6.99198	6.83418	7.9506	6.50143	6.6206	6.89646	8.27706	0.000425603	4.04415e-05	other_rna	other RNA
AT5G06870	8.67255	9.1681	8.98109	11.0327	8.87398	8.60863	9.47762	11.126	0.00299012	5.51833e-07	protein_coding	polygalacturonase inhibiting protein 2
AT5G07010	10.0927	11.3889	11.1383	12.7196	10.1536	11.0162	11.4145	13.0035	0.00141076	2.70952e-05	protein_coding	sulfotransferase 2A
AT5G07330	5.01022	6.19954	6.75947	9.00506	5.09989	5.80738	6.15957	7.27711	0.00179446	0.00674013	protein_coding
AT5G07500	5.04784	5.21025	5.31932	5.40165	5.2351	5.06338	5.68936	6.16363	0.0618136	1.40227e-05	protein_coding	Zinc finger C-x8-C-x5-C-x3-H type family protein
AT5G09440	12.2786	12.7709	12.4802	13.8097	12.5315	12.9308	12.41	14.2185	0.663525	0.0032287	protein_coding	EXORDIUM like 4
AT5G10300	8.87871	10.3038	9.42182	11.0633	8.78475	9.67995	8.90043	10.6676	1.95062e-07	0.00963297	protein_coding	methyl esterase 5
AT5G10650	8.33813	8.65793	8.59655	9.15949	8.43455	8.99788	8.7235	9.34491	0.00181568	1.28283e-05	protein_coding	RING/U-box superfamily protein
AT5G10930	7.95864	8.82578	8.17241	9.49784	8.0424	8.87465	8.02976	9.84407	0.000195394	3.588e-07	protein_coding	CBL-interacting protein kinase 5
AT5G10990	7.86624	7.83096	7.69195	8.94251	7.88835	8.76312	7.76388	9.07815	0.0126221	5.32025e-06	protein_coding	SAUR-like auxin-responsive protein family
AT5G11410	7.24106	7.58925	7.81952	8.45011	7.29932	7.44337	8.63665	9.0022	0.000751321	0.00657317	protein_coding	Protein kinase superfamily protein
AT5G11460	10.4409	11.4041	11.1381	11.7149	10.4683	11.3981	11.1439	11.8792	0.0844255	0.00226903	protein_coding	Protein of unknown function (DUF581)
AT5G12890	10.1737	10.6246	10.387	11.2448	10.5534	10.8342	10.7823	11.1879	0.482981	0.0416875	protein_coding	UDP-Glycosyltransferase superfamily protein
AT5G13080	6.20967	8.39694	6.95931	9.12703	6.69363	8.71029	7.0383	9.15496	3.70319e-08	5.2473e-09	protein_coding	WRKY DNA-binding protein 75
AT5G13330	10.4325	11.7978	11.6033	13.3144	10.4434	11.5889	11.7023	13.3051	0.724198	0.0041048	protein_coding	related to AP2 6l
AT5G13820	9.07334	9.87824	9.53019	10.4927	8.87071	9.59535	9.1866	10.4684	0.0877927	0.0402176	protein_coding	telomeric DNA binding protein 1
AT5G14070	8.18902	8.87157	8.97471	9.99312	8.22265	9.44086	8.61243	10.4953	9.22465e-06	0.0113622	protein_coding	Thioredoxin superfamily protein
AT5G14360	7.51594	8.6499	8.41493	8.72708	7.51732	8.71188	8.78584	8.87198	0.10795	1.15898e-08	protein_coding	Ubiquitin-like superfamily protein
AT5G14470	7.04146	7.65457	7.48701	8.1434	6.51235	7.15824	7.13251	7.88164	0.000354898	2.07369e-07	protein_coding	GHMP kinase family protein
AT5G14570	6.64712	7.04196	6.84119	7.66473	7.07348	7.43658	7.13348	7.99044	0.130084	1.30618e-05	protein_coding	high affinity nitrate transporter 2.7
AT5G14780	13.8605	14.3963	13.9539	14.9347	13.572	13.9861	14.5775	15.4183	0.0126367	0.000831361	protein_coding	formate dehydrogenase
AT5G14960	7.33083	7.36578	8.04446	8.24067	6.88777	6.75841	7.66015	7.9612	0.000460562	1.63028e-07	protein_coding	DP-E2F-like 2
AT5G15180	7.5687	7.88872	7.50403	9.2642	7.71785	7.82299	7.17531	8.21251	4.94536e-06	5.21786e-05	protein_coding	Peroxidase superfamily protein
AT5G15240	9.37442	9.05622	9.17779	9.47283	8.88369	8.86033	9.16686	10.0807	0.0371406	0.00169192	protein_coding	Transmembrane amino acid transporter family protein
AT5G15970	13.687	15.9507	14.3651	17.1918	13.6822	15.5166	13.8145	17.322	0.475656	0.000792973	protein_coding	stress-responsive protein (KIN2) / stress-induced protein (KIN2) / cold-responsive protein (COR6.6) / cold-regulated protein (COR6.6)
AT5G16940	9.61032	9.54355	10.0497	10.177	9.60142	9.52519	10.4686	10.5958	1.44388e-17	0.000765993	protein_coding	carbon-sulfur lyases
AT5G17165	7.66029	7.47026	8.47364	8.84522	7.15507	6.96077	8.02384	8.46434	0.000430833	5.62684e-08	protein_coding
AT5G17490	8.68251	9.23425	9.35239	9.59282	8.84329	9.21188	9.19361	9.9195	0.000261737	2.19397e-05	protein_coding	RGA-like protein 3
AT5G17760	8.60109	10.0681	9.1548	11.1153	9.13228	10.5138	9.40987	11.3456	0.000859326	0.00361722	protein_coding	P-loop containing nucleoside triphosphate hydrolases superfamily protein
AT5G17810	7.36581	8.00529	8.57745	9.11925	7.18423	7.69449	8.19117	8.99427	0.000468076	4.88594e-05	protein_coding	WUSCHEL related homeobox 12
AT5G17860	4.96446	5.7719	5.35347	6.08046	5.28927	5.82269	5.40388	6.4467	1.62657e-08	8.27661e-10	protein_coding	calcium exchanger 7
AT5G18130	7.32014	8.72248	8.14747	9.85166	7.25882	8.22136	7.93015	9.81845	0.00154975	0.000197965	protein_coding
AT5G19440	13.6061	14.1222	13.6596	14.5304	13.4838	13.7734	13.4294	14.4253	0.348059	0.00315645	protein_coding	NAD(P)-binding Rossmann-fold superfamily protein
AT5G20380	10.5909	10.8223	10.494	11.0971	10.7975	11.0089	10.9302	11.5065	3.85876e-05	0.000119868	protein_coding	phosphate transporter 4;5
AT5G20810	6.13249	6.63853	7.04142	7.41838	6.343	6.714	7.11682	7.56624	0.0193076	0.000183514	protein_coding	SAUR-like auxin-responsive protein family
AT5G20900	10.8971	11.6349	11.1331	11.9442	11.0069	11.6326	11.1541	12.5249	0.0735577	0.00232763	protein_coding	jasmonate-zim-domain protein 12
AT5G21940	10.0015	11.3768	11.6271	11.728	10.1573	11.3531	11.0535	12.3308	0.00506102	0.00032483	protein_coding
AT5G21950	6.34709	6.52502	7.01495	7.25921	6.31399	6.80914	6.86394	7.48592	0.000886743	0.00212708	protein_coding	alpha/beta-Hydrolases superfamily protein
AT5G22460	9.58682	11.6659	10.6336	12.1014	9.49178	10.9102	10.4825	11.9629	1.09423e-05	0.0430691	protein_coding	alpha/beta-Hydrolases superfamily protein
AT5G22500	11.2816	11.5871	12.3864	13.4194	11.4586	11.3988	13.2212	14.0244	7.33391e-05	1.9229e-09	protein_coding	fatty acid reductase 1
AT5G22910	4.92129	4.97991	4.89651	6.255	4.80074	4.77534	4.8251	4.85801	1.58261e-07	3.40587e-08	protein_coding	cation/H+ exchanger 9
AT5G23460	9.25123	9.85887	9.79233	10.4083	9.42186	9.94689	9.70385	10.378	0.0137208	0.00144369	protein_coding
AT5G24120	9.5922	10.7235	9.90988	11.6717	9.95095	11.2347	10.573	12.4492	8.02955e-05	8.8425e-07	protein_coding	sigma factor E
AT5G24530	10.3916	11.6051	10.9692	12.5064	10.5735	11.9841	10.7106	12.4525	0.420416	0.0101081	protein_coding	2-oxoglutarate (2OG) and Fe(II)-dependent oxygenase superfamily protein
AT5G24600	7.24531	8.86949	8.16171	9.91922	7.46909	9.13985	8.17165	10.167	0.760985	0.0015895	protein_coding	Protein of unknown function, DUF599
AT5G24870	10.5784	10.9846	10.9561	11.4811	10.5828	11.1505	10.8955	11.6795	0.00158664	7.62247e-05	protein_coding	RING/U-box superfamily protein
AT5G27930	9.73405	10.2521	10.2007	10.421	9.48608	9.73765	9.85992	10.5923	0.470331	0.000111983	protein_coding	Protein phosphatase 2C family protein
AT5G28646	5.8203	5.98841	6.31949	6.54706	6.10922	6.45117	6.84947	7.47172	5.93892e-08	0.0470509	protein_coding	TPX2 (targeting protein for Xklp2) protein family
AT5G32125	5.19809	5.18456	5.05735	5.78086	4.7756	5.07538	5.07121	5.09407	3.27178e-07	1.97082e-06	transposable_element_gene	transposable element gene
AT5G35069	5.05901	4.96688	5.07637	6.09787	4.89061	5.07939	5.06829	4.97008	8.82518e-08	0.000251117	protein_coding
AT5G35923	5.06409	5.03822	5.02285	5.85038	4.85676	4.7073	4.72783	4.87108	0.210307	2.16243e-06	transposable_element_gene	transposable element gene
AT5G37260	10.2681	11.0021	10.9865	11.8158	9.9771	10.7077	10.7867	12.0481	0.00500597	0.00924371	protein_coding	Homeodomain-like superfamily protein
AT5G38160	4.94251	5.03006	5.86402	6.37081	4.93903	5.0267	6.52454	7.17888	0.113877	0.0100566	protein_coding	Bifunctional inhibitor/lipid-transfer protein/seed storage 2S albumin superfamily protein
AT5G38170	4.74734	4.63401	5.04323	5.42345	4.78506	4.82083	5.70591	5.94476	0.593213	3.96003e-05	protein_coding	Bifunctional inhibitor/lipid-transfer protein/seed storage 2S albumin superfamily protein
AT5G38200	8.95388	9.60898	10.0746	10.7914	9.40098	10.3031	10.3101	10.8932	0.528705	6.26657e-08	protein_coding	Class I glutamine amidotransferase-like superfamily protein
AT5G38210	8.59966	9.16029	9.00421	9.45424	8.71388	9.59788	9.31272	9.83669	0.00714204	0.00110928	protein_coding	Protein kinase family protein
AT5G38850	7.70137	7.84646	7.54466	8.23145	8.18393	8.18977	8.10147	8.78405	0.356138	0.0073228	protein_coding	Disease resistance protein (TIR-NBS-LRR class)
AT5G38895	8.40167	9.1917	8.6622	9.51618	8.60081	9.39517	8.79822	9.81864	6.03348e-08	3.08629e-05	protein_coding	RING/U-box superfamily protein
AT5G39050	10.9294	12.207	11.6783	13.5525	10.8549	12.1444	11.6032	14.0432	0.00064491	0.000167448	protein_coding	HXXXD-type acyl-transferase family protein
AT5G40170	10.9353	11.3632	11.0864	11.6199	10.8452	11.2716	11.3022	11.8589	0.750799	0.00303288	protein_coding	receptor like protein 54
AT5G40720	6.9484	7.55715	7.44386	7.93174	7.5164	7.95585	7.70643	8.20519	0.279317	0.00807087	protein_coding	Domain of unknown function (DUF23)
AT5G40780	12.0697	12.9448	13.3187	13.5718	12.1023	13.1181	12.7597	13.1872	1.86842e-07	1.08032e-06	protein_coding	lysine histidine transporter 1
AT5G40860	6.84449	6.96785	7.89658	8.39963	7.18324	7.09346	7.64758	7.84156	6.9608e-06	1.39637e-06	protein_coding
AT5G40890	12.6723	13.0313	13.0691	13.6388	12.5544	12.7344	12.9771	13.8427	0.109229	0.0330065	protein_coding	chloride channel A
AT5G41460	9.89699	10.9081	10.541	11.0983	9.48245	10.8133	9.98664	10.9337	0.310717	4.22038e-08	protein_coding	Protein of unknown function (DUF604)
AT5G41810	10.2072	10.9914	10.466	11.2748	10.1278	11.0356	10.2858	11.2241	6.50406e-06	2.79999e-08	protein_coding
AT5G42040	6.93906	7.54019	7.37213	7.79399	6.74845	7.38356	7.37985	7.71894	0.000319723	0.00111891	protein_coding	regulatory particle non-ATPase 12B
AT5G42290	5.70426	7.46156	6.49875	8.46752	5.81869	6.84177	6.27818	8.21596	0.418256	2.91837e-08	protein_coding	transcription activator-related
AT5G42565	4.99704	5.12737	5.11	6.09361	4.85169	5.19518	5.12036	5.11398	0.602987	3.2074e-06	pseudogene
AT5G42900	5.92069	6.4242	6.0631	6.82068	5.72688	5.92881	5.84157	6.7747	2.35135e-10	0.000262796	protein_coding	cold regulated gene 27
AT5G43570	5.46598	5.65659	6.36689	7.56086	5.57925	5.4984	5.86356	6.66114	9.23026e-06	1.89905e-06	protein_coding	Serine protease inhibitor, potato inhibitor I-type family protein
AT5G43770	4.82538	5.11721	6.24534	7.50942	5.29153	5.33273	5.81627	6.62409	0.221047	1.04187e-05	protein_coding	proline-rich family protein
AT5G43980	7.4181	8.37659	8.15096	9.28275	7.3428	8.2943	8.01237	9.18012	0.0193749	6.08967e-08	protein_coding	plasmodesmata-located protein 1
AT5G44310	5.09875	5.21171	8.07186	9.38736	5.607	6.08679	7.25593	7.65893	0.104431	4.54505e-09	protein_coding	Late embryogenesis abundant protein (LEA) family protein
AT5G44360	5.3464	5.24428	5.37631	5.25995	5.02785	5.29112	5.52382	6.29599	0.000736356	0.003251	protein_coding	FAD-binding Berberine family protein
AT5G44790	11.9108	12.4249	12.2223	12.9162	12.1499	12.6337	12.329	12.812	2.31656e-07	6.93799e-09	protein_coding	copper-exporting ATPase / responsive-to-antagonist 1 / copper-transporting ATPase (RAN1)
AT5G44820	8.93517	9.49236	9.76648	10.3869	9.22165	10.2461	9.81735	10.3001	9.18786e-10	0.000408984	protein_coding	Nucleotide-diphospho-sugar transferase family protein
AT5G45690	4.9544	5.8048	6.49487	7.67588	5.05768	5.91712	5.99613	7.08401	0.256684	6.5526e-06	protein_coding	Protein of unknown function (DUF1264)
AT5G47240	5.72507	7.02971	6.84401	9.01331	6.99888	6.72994	8.0135	9.32083	0.00245412	0.00396689	protein_coding	nudix hydrolase homolog 8
AT5G47330	8.12459	9.51527	9.13914	11.9857	7.9256	9.1794	9.08334	12.3284	0.0271024	3.1845e-05	protein_coding	alpha/beta-Hydrolases superfamily protein
AT5G47390	11.9612	12.6133	12.194	12.7264	11.7468	12.3716	12.0303	13	0.000589396	6.4877e-05	protein_coding	myb-like transcription factor family protein
AT5G47430	10.2771	10.3706	10.4653	10.6238	10.6697	10.8349	10.9383	11.4853	2.18784e-09	0.000138669	protein_coding	DWNN domain, a CCHC-type zinc finger
AT5G50700	4.62829	5.02722	5.68091	6.20867	4.86728	4.96768	5.28989	5.5297	1.34212e-05	0.0131142	protein_coding	hydroxysteroid dehydrogenase 1
AT5G50720	11.4148	12.0824	11.6274	13.4088	10.4353	10.9154	10.6414	12.2163	2.30678e-08	2.78121e-07	protein_coding	HVA22 homologue E
AT5G51760	5.29791	5.96854	6.35137	7.58297	5.00983	5.53198	5.32375	7.02632	0.0297835	1.08748e-08	protein_coding	Protein phosphatase 2C family protein
AT5G52450	10.4788	10.4452	11.1797	11.5053	10.1597	10.1756	10.5489	11.1159	1.96333e-06	1.75996e-07	protein_coding	MATE efflux family protein
AT5G52660	7.2743	7.73836	7.42258	7.97224	7.34894	7.90063	7.38482	8.45995	0.817087	1.71391e-09	protein_coding	Homeodomain-like superfamily protein
AT5G53970	10.9777	12.0247	11.2587	12.7665	11.059	12.1406	11.5741	12.7911	0.000629138	3.29929e-06	protein_coding	Tyrosine transaminase family protein
AT5G54300	8.30205	10.1081	9.10494	11.1237	7.93701	10.0167	8.68827	10.9447	0.000421163	3.66186e-07	protein_coding	Protein of unknown function (DUF761)
AT5G55050	6.10652	6.55628	7.88352	8.79427	6.24909	7.04398	6.68841	8.47415	0.435656	0.00298646	protein_coding	GDSL-like Lipase/Acylhydrolase superfamily protein
AT5G55470	7.65165	7.89648	8.00851	8.51479	6.9548	7.49518	7.66346	8.46584	0.275326	5.96016e-05	protein_coding	Na+/H+ (sodium hydrogen) exchanger 3
AT5G55970	7.63326	8.34443	8.23889	9.31634	7.55954	8.00628	8.08497	9.09715	0.0175149	0.00126629	protein_coding	RING/U-box superfamily protein
AT5G56510	5.07065	5.46374	5.56387	5.96054	5.50774	6.00255	7.35632	8.21672	0.00547877	6.88506e-09	protein_coding	pumilio 12
AT5G56550	8.31809	8.50255	9.47753	9.43399	7.57093	7.52061	8.77836	9.02072	3.11717e-06	1.76164e-09	protein_coding	oxidative stress 3
AT5G57060	10.117	10.3276	10.265	10.6848	10.3676	10.9633	10.5824	11.3988	0.102709	0.000422841	protein_coding
AT5G57400	7.18417	8.37282	7.99103	8.87546	7.18317	8.14582	7.45662	8.49964	0.781736	4.25546e-08	protein_coding
AT5G57550	5.44315	6.14221	6.03816	8.72596	5.2661	5.16133	5.71528	7.3576	0.939076	2.40439e-05	protein_coding	xyloglucan endotransglucosylase/hydrolase 25
AT5G57610	10.2673	11.1082	10.434	11.5532	10.2645	11.0885	10.3656	11.6461	6.39078e-05	0.000137652	protein_coding	Protein kinase superfamily protein with octicosapeptide/Phox/Bem1p domain
AT5G57790	8.08574	8.87571	8.4608	9.80721	7.53548	8.0104	8.02549	9.4048	0.040223	0.00596325	protein_coding
AT5G57800	13.7926	14.0106	13.9596	15.0374	13.7944	14.0136	14.194	15.0881	0.706533	7.65239e-05	protein_coding	Fatty acid hydroxylase superfamily
AT5G58010	8.42977	8.30748	9.26612	9.97912	8.47031	8.66966	9.05492	9.33152	0.00164483	0.0117012	protein_coding	LJRHL1-like 3
AT5G58070	6.99806	7.71296	7.41358	8.46381	7.23626	7.67136	7.5663	8.79872	0.259766	0.0155023	protein_coding	temperature-induced lipocalin
AT5G58650	10.1683	10.1263	10.4445	10.9412	10.2709	10.1162	10.8679	11.6699	0.618983	0.00574343	protein_coding	plant peptide containing sulfated tyrosine 1
AT5G58700	11.3301	11.9605	11.7263	12.7735	11.2712	11.8451	11.5254	12.542	0.385524	1.14639e-08	protein_coding	phosphatidylinositol-speciwc phospholipase C4
AT5G59080	8.65626	9.03025	8.9884	9.73475	8.58659	8.97272	9.24672	10.3514	0.455415	1.01401e-06	protein_coding
AT5G59340	7.59853	8.31311	8.24648	8.98492	6.44127	7.63124	7.53371	9.31068	1.53393e-05	0.0228104	protein_coding	WUSCHEL related homeobox 2
AT5G59580	5.63929	6.52998	5.73232	7.71174	6.14482	6.50169	6.00468	7.83383	2.48753e-06	3.2333e-07	protein_coding	UDP-glucosyl transferase 76E1
AT5G59730	10.6098	11.4479	10.7636	11.381	10.526	11.1152	11.0588	11.9606	0.0207003	1.22e-06	protein_coding	exocyst subunit exo70 family protein H7
AT5G60060	5.95025	6.49675	7.28553	7.2711	6.36866	7.40514	7.60203	8.43916	1.80069e-05	0.000247607	protein_coding	Protein of unknown function (DUF295)
AT5G60360	15.5182	15.9602	15.794	16.4641	15.7037	16.0435	15.8164	16.6602	0.0352043	0.00546444	protein_coding	aleurain-like protease
AT5G60630	7.68381	7.87851	7.65053	8.20301	7.7615	8.08886	7.96348	8.88683	0.0190914	0.000382355	protein_coding
AT5G60760	9.02139	9.81809	10.5278	10.3896	8.47905	10.116	9.91593	10.3897	0.057887	1.54146e-06	protein_coding	P-loop containing nucleoside triphosphate hydrolases superfamily protein
AT5G61560	7.02186	8.2062	7.3474	8.43355	7.14023	7.71008	7.60998	8.7356	0.288306	1.09206e-07	protein_coding	U-box domain-containing protein kinase family protein
AT5G61820	11.892	13.683	12.3099	14.9072	12.0516	13.6615	12.0618	15.0238	0.0686697	0.000678664	protein_coding
AT5G62490	5.54238	10.2965	8.58567	11.1989	6.19589	10.491	7.85089	10.6589	0.0745903	0.00109333	protein_coding	HVA22 homologue B
AT5G62770	8.83433	9.98984	9.40188	10.2139	9.23726	10.0172	9.48907	10.5046	0.542057	4.55904e-06	protein_coding	Protein of unknown function (DUF1645)
AT5G63190	11.9455	12.5376	12.7097	13.5538	12.2228	12.7325	12.805	13.7353	1.75531e-10	0.0228792	protein_coding	MA3 domain-containing protein
AT5G63350	6.23802	8.67011	7.39618	10.2923	5.69548	7.74414	6.17162	10.4168	8.27076e-09	6.51047e-05	protein_coding
AT5G63450	8.74859	10.7036	9.55946	11.9437	7.19662	9.9421	8.17216	11.5232	0.00767705	0.000442225	protein_coding	cytochrome P450, family 94, subfamily B, polypeptide 1
AT5G63970	7.61156	8.01501	8.25461	8.80938	7.4469	7.94241	7.76853	8.49266	0.0106004	0.000331912	protein_coding	Copine (Calcium-dependent phospholipid-binding protein) family
AT5G64190	5.12488	5.38655	5.51625	6.41244	5.3601	5.65374	5.57084	6.36564	0.782787	4.73737e-07	protein_coding
AT5G64210	4.98128	5.75158	5.06554	6.43396	4.82717	5.23291	5.03642	5.94395	0.19804	2.23092e-08	protein_coding	alternative oxidase 2
AT5G64250	10.716	11.7922	10.9372	12.6806	10.8988	11.7603	10.9923	12.7442	0.00140995	1.44468e-05	protein_coding	Aldolase-type TIM barrel family protein
AT5G64410	10.7858	10.7364	11.4671	11.5875	10.3404	10.2512	11.02	11.1994	0.273344	5.13978e-05	protein_coding	oligopeptide transporter 4
AT5G64430	8.60942	9.22799	8.98172	10.1354	9.04696	9.37369	9.2597	10.1785	0.058283	2.31802e-08	protein_coding	Octicosapeptide/Phox/Bem1p family protein
AT5G65130	5.29972	6.88472	6.50246	7.7096	5.66106	6.47807	6.30521	7.89541	6.4596e-08	1.50637e-06	protein_coding	Integrase-type DNA-binding superfamily protein
AT5G65280	9.1729	10.9407	9.69376	11.6161	8.89971	10.169	8.89258	11.0043	0.0015532	0.000250627	protein_coding	GCR2-like 1
AT5G65640	11.796	12.6691	12.4927	13.0783	11.9756	12.7725	12.1536	12.6576	6.67541e-09	1.61088e-08	protein_coding	beta HLH protein 93
AT5G66170	11.4098	11.973	12.1022	12.9388	11.8049	11.7923	11.9031	12.5285	0.000357308	0.0225224	protein_coding	sulfurtransferase 18
AT5G66400	5.05928	6.91832	6.94361	8.71881	5.13028	5.65738	5.46575	6.5927	0.00488195	9.3604e-07	protein_coding	Dehydrin family protein
AT5G66480	8.17725	9.48067	9.08539	9.75511	7.96439	9.67525	8.75614	10.1333	0.0196621	0.00696761	protein_coding
AT5G66607	6.33864	6.37716	6.82912	6.60151	6.43479	6.80601	7.21988	7.48469	0.850933	0.00010143	protein_coding
AT5G66700	6.21195	6.67356	6.16815	6.98832	5.44813	6.52336	6.00763	7.05418	2.55514e-05	4.35122e-08	protein_coding	homeobox 53
AT5G66800	8.19918	8.63263	8.56725	9.49709	8.2299	8.49347	8.5678	9.78204	1.17644e-06	2.6657e-05	protein_coding
AT5G66870	7.59916	7.76348	8.07216	8.32639	7.8095	8.63116	8.08492	8.54228	0.370948	1.11095e-08	protein_coding	ASYMMETRIC LEAVES 2-like 1
AT5G66880	10.9794	11.5332	11.3547	11.9975	10.9007	11.3815	11.0966	11.9647	3.6145e-08	0.000365374	protein_coding	sucrose nonfermenting 1(SNF1)-related protein kinase 2.3
AT5G67030	12.5378	13.2462	12.4574	13.5654	12.3467	13.0565	12.631	13.8188	0.00331987	3.32648e-06	protein_coding	zeaxanthin epoxidase (ZEP) (ABA1)
AT5G67080	7.84691	8.41312	8.25422	9.46169	7.65758	7.53407	7.59044	9.29004	0.00613134	0.000859364	protein_coding	mitogen-activated protein kinase kinase kinase 19
AT5G67190	8.40246	8.90364	8.6995	8.73206	8.09012	8.78232	8.80328	9.19941	8.81366e-07	0.00642533	protein_coding	DREB and EAR motif protein 2
AT5G67340	8.30581	9.6911	8.81495	10.3411	8.06538	10.0379	8.60866	10.2107	0.298627	0.0239042	protein_coding	ARM repeat superfamily protein
AT5G67620	9.17304	9.65118	9.59653	10.1627	9.45772	10.1159	9.52225	10.5605	0.787696	9.40841e-07	protein_coding
1) Genes with a significant change in expression were selected using the following criteria: an expression log_2 ratio > 0.5 and a controlled p-value
(FDR; Benjamini and Hochberg, 1995) from t-test analysis < 0.05 in WT, hda19-3, quad, and quint between normal and salinity stress conditions.

## Sheet: S4
Supplemental Table S4. Genes classified into Group 2 in Figure 1C
AGI code	Col-0	Col-0 NaCl	hda19	hda19 NaCl	quad	quad NaCl	quint	quint NaCl	one-way ANOVA	BH FDR	function	annotation
AT1G01471	4.81342	4.75956	4.93856	5.00859	4.82427	9.05266	4.83829	4.76116	0.00257987	0.000167481	protein_coding
AT1G01560	5.12649	7.04539	5.24971	6.59493	5.22236	8.78662	5.1117	6.82115	2.74797e-07	0.000926886	protein_coding	MAP kinase 11
AT1G01680	5.28375	5.52533	5.11623	5.76789	5.02909	6.7099	5.46554	5.5167	0.278529	1.54235e-08	protein_coding	plant U-box 54
AT1G02820	10.5238	10.6886	9.81365	10.5043	10.6362	10.9337	10.3488	10.6526	2.40637e-06	1.73166e-08	protein_coding	Late embryogenesis abundant 3 (LEA3) family protein
AT1G04360	7.98141	7.97634	7.77917	7.22705	7.99182	8.42978	7.88156	8.28811	8.57694e-07	0.0011501	protein_coding	RING/U-box superfamily protein
AT1G05880	4.63493	5.64146	4.75199	5.05863	4.80009	6.05302	5.07937	5.08296	7.00079e-05	1.7615e-08	protein_coding	RING/U-box superfamily protein
AT1G08290	6.65291	7.33444	6.1876	6.63809	6.7798	7.49463	6.33513	6.92051	1.75812e-10	5.16819e-06	protein_coding	WIP domain protein 3
AT1G08440	4.96164	5.89469	4.74972	4.97206	4.81182	5.94836	4.5052	4.80728	2.84529e-07	2.00426e-09	protein_coding	Aluminium activated malate transporter family protein
AT1G09080	6.09815	6.93733	6.68262	6.76099	5.86762	6.8599	5.81677	6.23711	3.45079e-05	7.17058e-05	protein_coding	Heat shock protein 70 (Hsp 70) family protein
AT1G09930	9.6678	11.4392	9.00264	9.90215	9.88952	11.6183	9.48103	10.5402	6.16904e-05	0.000277215	protein_coding	oligopeptide transporter 2
AT1G10470	8.24279	9.35905	8.3729	8.89539	8.38995	10.8816	8.49498	9.3691	8.92018e-08	0.0270796	protein_coding	response regulator 4
AT1G12740	9.35036	9.64709	9.967	9.17526	9.46162	10.7539	9.64981	9.53814	1.24404e-08	0.00664518	protein_coding	cytochrome P450, family 87, subfamily A, polypeptide 2
AT1G13350	9.46558	10.0828	8.89151	9.22178	9.48161	10.1312	9.12676	9.46401	0.000903769	1.01293e-08	protein_coding	Protein kinase superfamily protein
AT1G13530	6.04394	6.55288	6.0611	6.22917	5.90497	7.15489	5.7855	6.26934	9.20024e-08	0.0419718	protein_coding	Protein of unknown function (DUF1262)
AT1G16160	6.89454	7.20904	6.78806	6.74063	6.54482	7.35993	6.16909	6.56764	1.17877e-09	1.26921e-07	protein_coding	wall associated kinase-like 5
AT1G16530	8.98401	10.5029	8.64525	9.51991	9.27235	10.9903	8.79454	10.233	0.178395	2.09974e-08	protein_coding	ASYMMETRIC LEAVES 2-like 9
AT1G18420	7.69526	6.4678	8.4605	7.6459	7.95443	10.1495	8.35576	7.25656	0.178685	0.000308389	protein_coding	Aluminium activated malate transporter family protein
AT1G20680	5.41596	6.1358	4.92272	5.48937	5.32701	6.2108	5.20474	5.32977	3.8534e-07	0.000638069	protein_coding	Protein of unknown function (DUF833)
AT1G21850	5.06256	5.50767	4.83379	5.09802	4.88477	6.66288	4.74571	5.15434	1.14202e-06	0.00220701	protein_coding	SKU5 similar 8
AT1G23530	9.24111	9.63959	8.91823	9.43991	9.66036	9.92244	9.37248	9.77054	0.00189944	9.98277e-09	protein_coding
AT1G23550	7.18991	7.44228	6.99562	7.39974	7.47206	7.7262	7.48239	8.02048	0.785515	0.00588343	protein_coding	similar to RCD one 2
AT1G25530	9.13003	10.0666	8.36376	9.02084	9.56871	10.2807	8.44379	9.13037	9.74747e-05	0.00292476	protein_coding	Transmembrane amino acid transporter family protein
AT1G26390	5.16456	5.51366	5.09456	5.31419	4.88363	6.05564	5.09642	5.56638	0.00219565	0.000249639	protein_coding	FAD-binding Berberine family protein
AT1G27420	9.12145	9.56967	8.78958	8.99955	9.02536	9.27995	8.45532	8.52615	3.5796e-09	1.10162e-05	protein_coding	Galactose oxidase/kelch repeat superfamily protein
AT1G31650	11.0194	11.0509	11.0507	10.7114	11.0475	12.7186	11.1238	10.9323	0.0475171	7.13459e-05	protein_coding	RHO guanyl-nucleotide exchange factor 14
AT1G32049	5.20805	6.26074	5.17407	5.41438	5.08222	6.58188	5.0518	5.52466	7.15245e-05	4.38203e-06	pseudogene
AT1G32510	5.86363	6.73712	5.88874	6.45341	6.459	7.14664	6.12878	6.77399	8.47971e-09	0.00155128	protein_coding	NAC domain containing protein 11
AT1G32900	14.5233	15.3378	14.2089	14.7728	14.8206	15.4708	13.935	14.6271	0.0193818	0.00273026	protein_coding	UDP-Glycosyltransferase superfamily protein
AT1G33612	6.51278	6.40512	6.76429	7.05819	6.99292	7.47462	6.80662	7.09721	0.985092	4.6366e-07	protein_coding	Leucine-rich repeat (LRR) family protein
AT1G33860	14.1257	14.7096	13.7266	13.8373	13.8862	14.3012	13.6975	13.6417	0.304327	0.00394812	protein_coding
AT1G34050	5.11255	10.3198	5.03295	6.89721	5.08289	11.642	4.95895	8.28467	1.09462e-06	5.76695e-06	protein_coding	Ankyrin repeat family protein
AT1G34670	8.74862	10.055	7.93069	8.15934	8.64812	10.9526	8.03196	9.48834	5.2213e-05	4.86747e-13	protein_coding	myb domain protein 93
AT1G35515	4.77103	5.45465	4.77394	5.10551	4.9278	6.51418	4.84557	5.58134	5.58675e-05	1.3338e-06	protein_coding	high response to osmotic stress 10
AT1G35850	4.79931	5.74243	4.95078	4.80416	4.69285	4.74297	4.959	4.6971	3.84659e-10	0.0371935	protein_coding	pumilio 17
AT1G36622	6.59949	8.22234	5.80384	7.11253	6.59747	8.55364	6.1194	8.09285	0.905887	9.84346e-07	protein_coding
AT1G36640	7.63015	8.74809	6.33742	7.37159	7.65501	9.14696	6.24083	7.95935	6.14156e-05	6.00919e-09	protein_coding
AT1G36732	5.96172	7.62703	5.71123	6.55097	6.28167	8.02977	5.93344	7.4365	0.00265288	6.49271e-06	protein_coding	conserved peptide upstream open reading frame 19
AT1G44125	6.39827	6.3631	6.11176	6.03036	6.44206	8.38191	6.35221	5.85096	0.193265	2.04407e-08	other_rna
AT1G44830	9.14387	10.1508	9.22211	9.10168	8.87357	10.8352	9.54018	8.97023	0.00176798	0.0106669	protein_coding	Integrase-type DNA-binding superfamily protein
AT1G49550	4.77232	5.90749	4.83922	5.25937	4.75477	6.14878	4.82187	5.34837	0.691068	4.2361e-09	transposable_element_gene	transposable element gene
AT1G50960	7.25371	10.0206	5.73046	8.09636	7.70208	10.1127	5.42587	7.45279	3.43689e-05	0.000711039	protein_coding	gibberellin 2-oxidase 7
AT1G51270	6.70349	7.07969	6.27622	6.36988	7.36125	7.6436	6.79259	7.2221	0.00594989	2.33074e-08	protein_coding	structural molecules;transmembrane receptors;structural molecules
AT1G52800	5.67794	6.67147	6.409	6.31074	6.19836	6.85146	5.3567	5.65165	2.79147e-07	2.47217e-07	protein_coding	2-oxoglutarate (2OG) and Fe(II)-dependent oxygenase superfamily protein
AT1G53200	6.03833	5.84302	5.76191	5.61688	6.1176	6.73066	5.94401	5.56564	0.106818	1.64506e-10	protein_coding
AT1G53610	5.53382	6.82553	5.73248	6.01844	5.47583	7.18988	5.55955	6.16401	0.462298	1.14489e-05	protein_coding
AT1G54575	10.6943	11.3601	10.5663	11.3703	11.2278	11.8461	10.9642	11.6059	0.000921004	0.00317311	protein_coding
AT1G58430	4.7709	4.73182	4.93218	4.77792	4.72734	8.17438	4.74571	4.63779	0.212113	0.000147536	protein_coding	GDSL-like Lipase/Acylhydrolase family protein
AT1G59810	5.57315	6.44952	5.00146	5.36611	5.32835	7.18339	5.30587	5.90733	0.000173751	7.28351e-08	protein_coding	AGAMOUS-like 50
AT1G60010	11.7954	12.7286	11.6662	11.5267	11.9282	13.0816	11.8348	12.171	0.000420591	0.00944783	protein_coding
AT1G60040	5.5603	6.67324	4.9228	5.35358	5.46469	7.21481	5.10486	5.84904	0.108143	0.00217667	protein_coding	AGAMOUS-like 49
AT1G61470	8.53242	9.20192	7.96416	8.79098	8.8616	9.33219	8.58307	9.4112	0.000318603	0.0376757	protein_coding	Polynucleotidyl transferase, ribonuclease H-like superfamily protein
AT1G64900	13.4124	13.9137	13.0544	13.3449	13.6137	14.2043	13.4123	13.796	0.759089	4.45751e-10	protein_coding	cytochrome P450, family 89, subfamily A, polypeptide 2
AT1G65485	4.90398	4.82316	4.93585	5.0001	5.09963	6.62674	4.76994	4.92223	4.31282e-08	3.00823e-05	transposable_element_gene	transposable element gene
AT1G65490	12.8241	13.1667	11.5277	12.6817	13.5076	13.5979	12.5957	13.6876	0.000133713	0.000694397	protein_coding
AT1G65900	11.258	11.8447	11.2862	11.2708	10.663	11.3042	10.8663	10.8476	6.79323e-08	9.63454e-10	protein_coding
AT1G67120	11.5134	11.2113	10.7923	10.3389	11.5335	12.9606	10.7556	10.1389	0.840765	1.02226e-06	protein_coding	ATPases;nucleotide binding;ATP binding;nucleoside-triphosphatases;transcription factor binding
AT1G67710	6.3707	7.34482	6.13554	6.6558	6.57338	7.98352	6.42382	7.22039	5.11052e-05	0.00279015	protein_coding	response regulator 11
AT1G68390	7.561	8.00885	7.29675	7.31525	7.63945	8.46366	7.332	7.69817	0.0716784	3.35727e-10	protein_coding	Core-2/I-branching beta-1,6-N-acetylglucosaminyltransferase family protein
AT1G70380	4.73115	5.55271	4.94571	4.75381	4.76632	5.75495	4.66125	5.08906	0.0411023	8.27676e-10	protein_coding	F-box and associated interaction domains-containing protein
AT1G70390	5.06161	7.35954	5.002	5.52344	4.83455	7.33173	4.92159	5.5292	0.00330036	0.00170021	protein_coding	F-box and associated interaction domains-containing protein
AT1G70800	8.56777	9.37172	7.74896	8.47617	8.84175	9.0244	7.93648	8.44417	4.72535e-05	0.00680745	protein_coding	Calcium-dependent lipid-binding (CaLB domain) family protein
AT1G70900	10.6373	11.2986	10.5897	11.1165	11.1653	11.7285	10.8213	11.354	3.401e-05	8.87462e-07	protein_coding
AT1G70950	10.947	10.3082	11.1727	10.5081	10.8269	12.1013	10.9889	10.3824	0.000538597	1.06893e-06	protein_coding	TPX2 (targeting protein for Xklp2) protein family
AT1G71130	10.5974	11.2307	10.5101	11.1483	11.0768	11.5616	10.6863	11.4936	5.05052e-08	0.000516016	protein_coding	Integrase-type DNA-binding superfamily protein
AT1G71400	10.889	11.3988	10.6777	11.0143	10.4945	11.7736	10.2643	10.7339	0.0371889	0.00318547	protein_coding	receptor like protein 12
AT1G71870	8.90892	9.28693	9.21632	9.42824	9.46563	9.91432	9.13359	9.56449	2.26129e-07	0.00240862	protein_coding	MATE efflux family protein
AT1G73603	4.67137	5.36887	4.78784	4.94261	4.85614	5.69583	4.8684	4.98793	6.39551e-07	3.23901e-05	protein_coding	low-molecular-weight cysteine-rich 64
AT1G74830	6.79821	8.14725	7.36666	7.85125	7.27693	8.23321	7.49481	7.61997	0.000266287	6.44618e-08	protein_coding	Protein of unknown function, DUF593
AT1G75580	11.5619	12.9701	11.5545	11.6005	11.3019	12.5995	11.5832	11.3437	0.0192282	0.00363139	protein_coding	SAUR-like auxin-responsive protein family
AT1G76210	5.18399	6.70652	4.8094	5.0888	5.23008	7.03737	4.98924	5.25098	0.130446	6.51229e-08	protein_coding	Arabidopsis protein of unknown function (DUF241)
AT1G76690	11.6556	11.8894	11.7489	11.984	11.8683	12.3094	11.2479	11.7025	7.96309e-09	0.000412206	protein_coding	12-oxophytodienoate reductase 2
AT1G76965	5.2874	6.08054	5.29682	5.40824	5.01505	6.5859	5.29028	5.85558	0.00736426	0.0281047	protein_coding
AT1G78100	11.9841	13.5035	11.9858	12.3222	11.8094	13.9947	11.9682	12.9651	0.000499809	0.000116674	protein_coding	F-box family protein
AT1G78120	10.5718	11.798	10.7156	10.395	10.5284	12.4021	10.3858	11.8298	9.30691e-08	6.70393e-09	protein_coding	Tetratricopeptide repeat (TPR)-like superfamily protein
AT2G02000	6.32718	6.91006	7.0899	6.69797	6.73074	7.88052	7.06773	6.90204	0.000215856	3.8254e-05	protein_coding	glutamate decarboxylase 3
AT2G02280	4.87005	4.82856	4.74107	4.90509	4.82095	6.19673	4.71899	4.75074	4.39053e-07	0.000711516	protein_coding	phloem protein 2-B4
AT2G02310	5.46433	7.1916	5.33885	5.62725	5.56427	7.51925	5.01536	5.65287	0.96321	4.59777e-07	protein_coding	phloem protein 2-B6
AT2G02700	5.09829	4.95646	5.11624	4.61743	5.09265	6.08286	5.1276	4.78169	0.0120062	0.0345145	protein_coding	Cysteine/Histidine-rich C1 domain family protein
AT2G03460	5.48673	6.25639	5.38865	5.32139	5.28523	6.1123	5.22588	5.59431	3.72665e-09	0.0306029	protein_coding	Galactose oxidase/kelch repeat superfamily protein
AT2G04490	5.09531	5.30505	4.87078	5.00002	4.70806	5.7907	4.85478	5.38886	0.000576388	9.05223e-08	transposable_element_gene	transposable element gene
AT2G07795	5.84118	5.38315	5.55331	5.22107	5.67527	6.2306	5.71206	5.30963	2.748e-06	1.853e-07	protein_coding
AT2G13130	5.1108	5.07567	5.24008	5.15661	5.1838	7.37992	5.37836	5.04054	0.488473	1.02141e-07	pseudogene
AT2G14960	8.64335	10.2548	8.83829	8.12024	8.46691	11.1664	8.23431	8.81316	0.00643797	0.0175951	protein_coding	Auxin-responsive GH3 family protein
AT2G15400	6.66638	6.22493	7.22997	6.53398	6.94582	8.00766	7.48543	6.76793	0.00014504	0.0160413	protein_coding	DNA-directed RNA polymerase family protein
AT2G16890	8.67669	9.25134	7.89043	8.62888	8.67041	9.30649	8.33495	8.87167	0.703572	0.000552391	protein_coding	UDP-Glycosyltransferase superfamily protein
AT2G18180	5.17032	6.00114	4.99813	5.22774	5.22484	6.47579	4.95258	5.25417	0.0147779	8.60548e-07	protein_coding	Sec14p-like phosphatidylinositol transfer family protein
AT2G18190	5.42181	5.99185	4.8327	5.15187	5.07964	6.77072	5.01409	5.30285	0.008428	6.54763e-06	protein_coding	P-loop containing nucleoside triphosphate hydrolases superfamily protein
AT2G18620	8.25867	8.80365	8.30926	7.98746	8.20418	8.91684	7.84812	8.06301	8.59639e-12	1.47564e-07	protein_coding	Terpenoid synthases superfamily protein
AT2G19572	9.5856	9.16156	9.58981	8.86173	9.69487	12.0862	9.8155	8.98546	0.00575951	0.00410462	other_rna
AT2G20170	4.89367	7.30735	4.8794	4.9362	4.90334	8.17623	4.80162	6.01737	6.37662e-12	2.4344e-09	protein_coding	Protein of Unknown Function (DUF239)
AT2G21740	4.84674	6.18518	4.68675	5.25471	4.57878	8.34433	4.735	6.4699	5.67063e-05	0.000500388	protein_coding	Protein of unknown function (DUF1278)
AT2G23170	5.19687	9.9626	5.31909	6.82425	5.15667	11.2213	5.21041	7.9321	2.4789e-06	0.00124766	protein_coding	Auxin-responsive GH3 family protein
AT2G23720	4.81708	5.00835	4.63818	4.90613	5.22632	5.83668	4.96138	5.15691	0.000140778	0.00719471	transposable_element_gene	transposable element gene
AT2G24320	4.89714	6.37071	4.85466	5.31837	4.99961	6.2181	4.92567	5.79569	0.171378	6.20371e-05	protein_coding	alpha/beta-Hydrolases superfamily protein
AT2G24430	7.61418	8.25685	6.56923	7.01532	7.65961	8.57814	6.85692	8.07917	9.20435e-05	4.02097e-06	protein_coding	NAC domain containing protein 38
AT2G27395	9.82866	10.5994	9.48667	8.96694	9.1306	10.068	8.76463	9.08432	1.33294e-05	2.30261e-10	pseudogene
AT2G27420	9.94673	10.7685	9.66024	9.07772	9.27818	10.2036	8.81546	9.17143	0.000636432	1.37638e-05	protein_coding	Cysteine proteinases superfamily protein
AT2G28590	6.76896	7.05995	6.67835	6.96735	7.0683	7.81076	7.2553	7.66703	0.028714	0.000111499	protein_coding	Protein kinase superfamily protein
AT2G28900	6.374	6.96023	5.98229	6.07163	6.49368	7.18992	5.97334	6.12017	0.183504	0.000109403	protein_coding	outer plastid envelope protein 16-1
AT2G29110	4.81081	5.47239	4.73928	4.83077	4.71728	6.25447	4.78629	5.0748	2.30212e-08	3.19765e-08	protein_coding	glutamate receptor 2.8
AT2G29263	4.94972	4.97152	4.87959	4.78236	4.97521	7.1894	5.35056	4.86195	2.18606e-06	0.00149254	protein_coding
AT2G29670	8.44524	10.1069	7.363	8.49569	8.72997	10.3704	7.57313	8.90773	0.000194824	9.76015e-12	protein_coding	Tetratricopeptide repeat (TPR)-like superfamily protein
AT2G31850	4.82901	4.93826	4.84276	4.74148	4.93467	8.62489	4.57497	4.69389	6.76599e-07	0.0129958	protein_coding
AT2G33310	9.56205	10.2516	9.71352	9.6453	9.34411	10.6867	9.58237	10.2268	0.0130841	0.00498401	protein_coding	auxin-induced protein 13
AT2G35700	7.96223	8.60189	7.76438	8.06939	7.95543	8.97701	8.04461	7.80273	0.000272666	0.000137893	protein_coding	ERF family protein 38
AT2G36030	6.317	7.10709	6.20992	6.83715	6.1733	8.65217	6.1334	6.74506	0.000211002	0.0261917	protein_coding
AT2G37240	13.1765	13.7158	12.5279	13.0255	13.2817	13.6476	12.7721	13.2307	5.78409e-06	2.25387e-09	protein_coding	Thioredoxin superfamily protein
AT2G37300	8.64725	9.16472	8.08198	8.5517	8.6041	9.18541	8.2022	8.32778	0.0145536	4.80205e-05	protein_coding
AT2G37650	8.91454	9.77981	8.85434	9.53166	9.27725	10.0497	9.08607	9.66113	1.91468e-06	0.0160523	protein_coding	GRAS family transcription factor
AT2G37810	4.70805	5.35312	4.88719	5.10739	4.88081	6.4697	4.69575	5.04729	0.255947	0.00151455	protein_coding	Cysteine/Histidine-rich C1 domain family protein
AT2G38255	5.28193	6.39265	4.92272	5.5006	5.14446	6.52417	5.02119	6.02606	2.39646e-06	6.50416e-08	protein_coding	Protein of Unknown Function (DUF239)
AT2G39250	11.0889	12.2401	9.99646	10.3174	10.0444	11.5304	10.0802	10.7595	0.000483388	1.82423e-07	protein_coding	Integrase-type DNA-binding superfamily protein
AT2G40130	7.14672	8.42084	6.66269	7.34175	7.56734	8.89795	6.6839	8.04079	2.39398e-06	6.2083e-08	protein_coding	Double Clp-N motif-containing P-loop nucleoside triphosphate hydrolases superfamily protein
AT2G40180	7.221	8.80373	6.21349	7.326	7.36784	8.75538	6.39656	8.1076	0.374795	0.00700085	protein_coding	phosphatase 2C5
AT2G40900	9.29231	10.3233	8.82685	9.45392	9.23784	10.6605	9.06996	9.88555	6.83985e-07	0.0153971	protein_coding	nodulin MtN21 /EamA-like transporter family protein
AT2G41180	6.78979	7.33206	6.32785	6.28751	6.87652	7.80342	6.45624	6.59654	4.15211e-07	0.0455399	protein_coding	VQ motif-containing protein
AT2G41310	6.78528	7.94421	6.83328	6.84675	7.07532	9.21577	7.03593	8.01865	0.00112227	0.00028218	protein_coding	response regulator 3
AT2G42440	5.73537	7.20785	5.67954	6.0195	6.03688	8.37609	5.72325	7.20893	4.67217e-10	0.0030045	protein_coding	Lateral organ boundaries (LOB) domain family protein
AT2G42600	15.5429	16.0257	15.1374	15.3786	15.7928	16.4578	15.4614	15.5442	0.0788062	8.89107e-07	protein_coding	phosphoenolpyruvate carboxylase 2
AT2G43300	6.28054	5.73762	5.97077	5.73361	6.16466	8.57427	6.27648	5.94746	0.0102492	0.0101038	pre_trna	pre-tRNA
AT2G43310	7.81098	7.47604	7.68118	7.45024	7.71634	10.1312	7.55166	7.13388	0.00995476	0.00777785	protein_coding	Ribosomal L18p/L5e family protein
AT2G43520	9.29963	9.58145	8.36233	8.81465	9.67943	9.71267	8.862	9.63706	0.00355999	2.7159e-06	protein_coding	trypsin inhibitor protein 2
AT2G43620	11.5209	12.2412	10.947	11.1405	12.3053	12.6718	11.7207	12.1205	0.021558	1.07751e-05	protein_coding	Chitinase family protein
AT2G44070	6.28724	7.01901	5.91122	7.01588	6.9901	7.74737	6.57592	7.25433	0.65632	0.0279972	protein_coding	NagB/RpiA/CoA transferase-like superfamily protein
AT2G44300	10.149	10.5446	9.94646	9.99371	10.1566	10.5337	9.57835	9.50034	5.77983e-06	8.78849e-07	protein_coding	Bifunctional inhibitor/lipid-transfer protein/seed storage 2S albumin superfamily protein
AT2G44370	9.69444	9.90906	10.1993	9.7818	9.34548	10.9814	9.34859	9.87049	0.52649	0.00197791	protein_coding	Cysteine/Histidine-rich C1 domain family protein
AT2G45403	6.53413	7.11895	6.3508	6.42227	6.39633	7.73226	6.45961	6.87617	0.957825	1.73843e-09	protein_coding
AT2G45410	5.85174	6.45284	5.44772	5.3922	6.03632	7.30519	5.46841	5.34273	0.00328669	4.00263e-06	protein_coding	LOB domain-containing protein 19
AT2G45550	5.06534	5.44253	4.6724	4.84046	5.05731	6.01705	5.02492	4.7324	2.72971e-06	6.42238e-08	protein_coding	cytochrome P450, family 76, subfamily C, polypeptide 4
AT2G46150	7.85594	8.12698	7.77951	7.92279	7.91149	8.70093	7.50884	8.06159	6.45698e-09	0.00214705	protein_coding	Late embryogenesis abundant (LEA) hydroxyproline-rich glycoprotein family
AT2G46410	9.56629	10.3411	9.59572	10.0161	9.47274	12.0636	9.56431	10.3911	4.63397e-05	0.0020111	protein_coding	Homeodomain-like superfamily protein
AT2G46493	4.76066	4.7651	4.704	4.82159	4.69481	6.24742	4.78267	4.60548	2.1221e-07	0.0138123	protein_coding	RING/U-box superfamily protein
AT2G46760	7.64153	7.77081	7.72328	7.55178	7.9305	8.82652	7.72242	7.85893	5.35482e-07	1.05792e-05	protein_coding	D-arabinono-1,4-lactone oxidase family protein
AT2G47280	5.00084	4.72539	4.82987	4.76915	4.69874	8.19876	4.89544	4.73943	0.000973093	5.96294e-05	protein_coding	Pectin lyase-like superfamily protein
AT3G01800	6.75721	7.25667	6.49153	6.80703	7.03475	7.65648	6.6332	7.23922	0.000450195	0.00609446	protein_coding	Ribosome recycling factor
AT3G02940	7.27365	8.82121	6.207	7.57426	7.20773	9.1297	6.36926	7.69988	0.630529	3.25934e-05	protein_coding	myb domain protein 107
AT3G06020	9.09225	10.1735	7.85329	8.49595	9.32325	10.3308	8.16343	8.98236	0.00381329	0.0199978	protein_coding	Protein of unknown function (DUF3049)
AT3G09940	9.25303	10.0227	9.76914	9.89794	9.66036	10.2947	9.53539	9.61861	0.201544	1.02714e-10	protein_coding	monodehydroascorbate reductase
AT3G11260	8.32796	9.21124	7.53015	8.13974	8.42605	9.21306	7.50345	8.27355	6.92448e-05	0.005829	protein_coding	WUSCHEL related homeobox 5
AT3G13062	11.2407	10.961	11.1476	11.0186	11.2454	12.3885	11.2549	11.3736	0.000102976	3.31053e-06	protein_coding	Polyketide cyclase/dehydrase and lipid transport superfamily protein
AT3G13110	11.3303	12.0275	11.2533	11.2735	11.3176	12.0409	11.0107	11.0873	3.46003e-06	1.82049e-05	protein_coding	serine acetyltransferase 2;2
AT3G13435	9.62824	10.7819	9.40003	9.80907	9.94225	11.5407	9.31727	10.1786	0.000239497	9.78191e-05	protein_coding
AT3G13437	6.13806	7.02151	5.86735	6.20279	6.52714	7.46067	5.75142	6.41462	0.000357493	2.93138e-06	protein_coding
AT3G13600	9.3953	10.455	9.47692	9.74856	9.32335	11.0516	9.49093	10.0602	3.01893e-07	0.000150842	protein_coding	calmodulin-binding family protein
AT3G13950	7.56622	8.48523	7.00099	7.63283	7.51624	8.96323	6.82998	7.63436	7.53707e-07	0.0170326	protein_coding
AT3G14370	9.23739	10.5795	9.11639	9.60552	9.76968	10.7326	9.333	9.53506	4.50742e-07	1.73356e-17	protein_coding	Protein kinase superfamily protein
AT3G15300	9.85317	10.2998	9.92297	10.4137	10.1304	10.9379	9.93829	10.3685	2.38872e-06	4.59264e-07	protein_coding	VQ motif-containing protein
AT3G15370	6.78714	6.43228	6.21948	5.80083	6.60844	8.45998	6.79916	6.20168	4.80961e-09	7.00747e-14	protein_coding	expansin 12
AT3G15540	9.83885	11.5861	9.52109	9.86332	9.70268	11.4629	9.90122	10.6185	2.62169e-05	4.33358e-10	protein_coding	indole-3-acetic acid inducible 19
AT3G15605	5.22033	5.12115	5.08961	5.19602	4.9506	8.4057	5.18384	5.18207	8.82732e-06	3.22081e-08	protein_coding	nucleic acid binding
AT3G18710	10.7224	11.5667	10.246	10.6987	10.8647	11.9562	10.2277	10.8192	0.0074601	3.20492e-08	protein_coding	plant U-box 29
AT3G19000	12.2685	12.8535	12.0257	12.2845	12.3138	13.0117	11.8471	12.2417	0.00351041	0.000192023	protein_coding	2-oxoglutarate (2OG) and Fe(II)-dependent oxygenase superfamily protein
AT3G20520	5.23823	7.16808	4.93966	5.51256	5.18087	7.59694	4.93705	6.01939	1.35821e-09	1.00751e-05	protein_coding	SHV3-like 3
AT3G21210	6.66453	6.64035	6.45392	6.58368	6.98821	9.44699	6.54452	6.52248	2.61249e-06	1.82906e-09	protein_coding	zinc ion binding
AT3G21620	6.72986	7.27473	6.97031	7.07506	6.49314	7.23753	6.20603	6.49796	0.00168064	6.20942e-05	protein_coding	ERD (early-responsive to dehydration stress) family protein
AT3G21660	5.75031	7.14357	5.33296	5.90785	5.54132	6.35666	5.45822	5.78364	0.346266	0.000142293	protein_coding	UBX domain-containing protein
AT3G21870	9.62831	10.0773	8.68563	9.28768	9.21663	10.0549	8.87643	9.95719	3.10248e-15	0.0297501	protein_coding	cyclin p2;1
AT3G22250	5.36061	6.03672	5.05724	5.57949	5.53596	5.86501	4.93772	5.33435	0.000177951	0.0066978	protein_coding	UDP-Glycosyltransferase superfamily protein
AT3G23630	7.26416	7.54675	6.98662	7.0006	7.3826	8.7977	7.16756	6.87914	2.70191e-14	7.05655e-05	protein_coding	isopentenyltransferase 7
AT3G26872	4.77912	4.74566	4.62585	4.71508	4.90082	5.63593	4.82968	4.79422	9.66144e-07	0.0101855	pseudogene
AT3G33572	4.80095	4.81612	4.85227	4.72627	4.80675	6.03826	4.81193	4.74106	0.467187	1.28174e-06	transposable_element_gene	transposable element gene
AT3G42711	4.88855	4.80531	4.9451	4.71164	4.7305	7.7807	4.67926	4.7927	0.0038649	0.0271072	transposable_element_gene	transposable element gene
AT3G42728	4.99439	4.94201	4.98928	4.95712	4.78643	6.13265	4.96554	4.86215	0.141686	0.0294641	protein_coding
AT3G45140	14.3682	15.5436	13.6622	14.9686	14.9138	16.2503	14.2141	15.231	2.49703e-08	0.0204346	protein_coding	lipoxygenase 2
AT3G46600	9.04319	9.71194	9.14754	9.62373	9.4472	10.3034	9.34264	9.94862	0.854066	0.0403149	protein_coding	GRAS family transcription factor
AT3G47480	7.29497	7.78489	6.98188	7.8532	8.75538	9.34644	7.69381	8.25146	0.534933	1.36801e-06	protein_coding	Calcium-binding EF-hand family protein
AT3G50760	7.03896	7.37405	6.84102	6.54137	7.13873	7.63108	6.89101	7.10945	7.64069e-07	0.0468736	protein_coding	galacturonosyltransferase-like 2
AT3G53830	10.052	10.7903	9.83084	10.3062	10.0942	10.6572	9.74012	10.1607	0.296941	0.0137873	protein_coding	Regulator of chromosome condensation (RCC1) family protein
AT3G55050	11.1127	11.7356	10.9828	11.6356	11.3685	12.0026	11.3136	11.7309	1.30597e-05	0.00254312	protein_coding	Protein phosphatase 2C family protein
AT3G58190	6.64563	10.3523	5.78318	6.76718	7.07605	11.7821	5.48865	8.76766	2.33107e-05	1.03614e-07	protein_coding	lateral organ boundaries-domain 29
AT3G59620	5.74569	7.41998	4.99815	5.37501	5.90659	7.42752	5.04682	5.28235	0.00843057	3.42282e-06	protein_coding	Mannose-binding lectin superfamily protein
AT3G60470	5.2825	5.45121	5.38195	5.19714	6.85383	7.64122	5.44127	5.36438	0.00107829	0.0204503	protein_coding	Plant protein of unknown function (DUF247)
AT3G60700	7.01504	6.31835	6.05123	5.85157	6.96061	10.2971	5.98483	5.75713	2.33229e-08	3.32522e-06	protein_coding	Protein of unknown function (DUF1163)
AT3G61280	5.04297	5.9228	5.36917	5.33589	4.96835	6.18983	5.18196	4.98938	0.00659843	0.0272057	protein_coding	Arabidopsis thaliana protein of unknown function (DUF821)
AT3G61330	5.09282	5.05915	5.13668	5.00191	4.99949	8.60081	5.13847	4.90571	2.03419e-05	4.38999e-05	transposable_element_gene	transposable element gene
AT3G61400	7.99893	9.53397	8.48565	8.16524	7.8398	9.92281	7.56363	8.27157	0.498626	0.000535695	protein_coding	2-oxoglutarate (2OG) and Fe(II)-dependent oxygenase superfamily protein
AT3G62070	4.71336	5.62459	4.77748	4.85093	4.73169	5.79183	4.8555	5.37917	0.0121026	2.16126e-06	protein_coding
AT3G62730	7.26196	8.23761	6.81611	7.79302	7.64694	8.26463	6.6333	7.68422	0.00591951	0.000448552	protein_coding
AT4G00230	6.20144	5.85115	6.14993	5.78291	6.41816	7.10207	6.20673	5.97715	0.152316	1.47908e-14	protein_coding	xylem serine peptidase 1
AT4G01080	6.93309	7.97391	6.74878	7.19826	7.07769	7.80494	6.66064	7.05174	1.58908e-08	0.00983057	protein_coding	TRICHOME BIREFRINGENCE-LIKE 26
AT4G01490	7.13367	6.68343	6.55142	5.55955	6.92895	9.90583	6.23367	5.46172	0.667356	2.49257e-05	transposable_element_gene	transposable element gene
AT4G03480	4.98035	6.10109	4.88892	5.24159	4.97371	6.06074	5.08723	5.33507	2.99476e-07	9.42796e-05	protein_coding	Ankyrin repeat family protein
AT4G04490	5.49802	7.60206	5.5373	6.22257	5.55385	8.12331	5.14379	6.71149	0.000969833	1.79149e-06	protein_coding	cysteine-rich RLK (RECEPTOR-like protein kinase) 36
AT4G04760	7.28445	7.88014	7.21439	7.40807	7.18724	7.6712	6.67583	7.00194	0.001629	0.00815285	protein_coding	Major facilitator superfamily protein
AT4G07523	4.73318	5.03619	4.74224	4.72832	5.95159	6.48825	5.03901	5.22437	5.67261e-10	0.00559542	transposable_element_gene	transposable element gene
AT4G08030	4.69652	4.79437	4.69372	4.68483	4.99132	5.56738	4.52668	4.87694	0.00127427	0.00330101	transposable_element_gene	transposable element gene
AT4G08602	4.85869	5.1188	5.01754	4.73483	5.75249	6.15674	5.00548	5.08975	1.75527e-10	0.0340212	transposable_element_gene	transposable element gene
AT4G11480	5.06232	6.81568	4.88861	5.30056	5.14217	7.01236	5.06964	5.72455	5.02513e-08	1.61785e-06	protein_coding	cysteine-rich RLK (RECEPTOR-like protein kinase) 32
AT4G13710	9.43826	10.0241	9.43969	9.51922	9.1931	9.78295	9.00452	9.30984	0.418955	0.0111453	protein_coding	Pectin lyase-like superfamily protein
AT4G14368	4.91206	8.36061	4.91547	6.55766	4.96809	9.84156	4.91525	7.1831	0.435502	0.000230944	protein_coding	Regulator of chromosome condensation (RCC1) family protein
AT4G15510	13.2196	13.1169	13.2136	13.0574	13.0814	14.2065	13.1118	12.9721	2.57608e-07	0.000203222	protein_coding	Photosystem II reaction center PsbP family protein
AT4G17970	9.08306	9.36238	7.76427	8.67098	9.4465	9.72446	8.43516	9.39617	0.0131069	0.0215792	protein_coding	aluminum-activated, malate transporter 12
AT4G18422	6.56916	7.79496	5.92238	6.77097	6.5821	7.59508	5.97095	7.14099	0.640563	5.18891e-06	protein_coding
AT4G19520	5.81619	8.27055	5.12665	6.29729	5.50878	8.63187	4.98965	6.94411	0.0304213	0.000797678	protein_coding	disease resistance protein (TIR-NBS-LRR class) family
AT4G19920	5.41719	6.52708	5.34411	5.89968	5.66598	6.58132	5.58948	6.18414	0.614245	0.000648509	protein_coding	Toll-Interleukin-Resistance (TIR) domain family protein
AT4G22115	4.79945	5.80242	5.41299	5.00956	4.85502	5.13641	4.81568	5.1073	0.00303318	0.00208198	protein_coding	SCR-like 14
AT4G22420	4.85118	4.94145	4.90354	4.69379	4.8235	7.68305	4.877	4.8199	0.625441	0.0165638	protein_coding	Ubiquitin-specific protease family C19-related protein
AT4G22592	7.83379	10.0386	7.90481	8.7873	8.14793	10.5022	7.75452	9.28948	5.23556e-08	9.18024e-06	protein_coding	conserved peptide upstream open reading frame 27
AT4G22780	7.84027	8.67106	8.36034	7.76701	8.16201	8.95228	7.80043	8.56073	0.00140319	0.0195413	protein_coding	ACT domain repeat 7
AT4G23640	4.93127	5.05924	5.045	5.04245	5.0243	8.54655	5.06704	4.98158	0.521826	1.50706e-05	protein_coding	Potassium transporter family protein
AT4G23810	6.76	8.42315	6.7547	7.48232	6.938	8.76102	6.61802	7.88558	1.51171e-07	0.0398905	protein_coding	WRKY family transcription factor
AT4G24040	9.6628	9.76374	9.49896	9.81308	10.0051	10.4209	9.97687	10.5551	0.006182	0.00229047	protein_coding	trehalase 1
AT4G25200	6.0922	6.87075	5.98243	6.2128	6.20756	6.43882	6.33177	5.81705	0.00265005	0.000257414	protein_coding	mitochondrion-localized small heat shock protein 23.6
AT4G25330	5.02831	5.72252	5.25077	5.36044	5.31732	6.37698	5.23054	5.37727	7.89889e-07	0.000237914	protein_coding
AT4G28640	10.0432	10.9157	9.8063	10.0056	10.0151	10.6917	9.76065	10.0814	0.0254245	0.000807048	protein_coding	indole-3-acetic acid inducible 11
AT4G28790	5.97177	6.1589	5.55858	5.64085	5.99867	8.66588	5.44528	5.29782	0.0247088	0.008899	protein_coding	basic helix-loop-helix (bHLH) DNA-binding superfamily protein
AT4G29280	4.81135	6.92636	4.97368	5.69648	4.93561	7.11428	4.8723	5.95398	1.79492e-07	0.0105439	protein_coding	low-molecular-weight cysteine-rich 22
AT4G29285	5.93039	8.27038	6.88171	7.5416	4.82468	8.15378	4.95448	6.46481	0.115702	2.46495e-16	protein_coding	low-molecular-weight cysteine-rich 24
AT4G31398	5.68472	5.87248	5.34092	5.68307	5.88447	6.46397	5.73784	6.27993	0.000527403	0.0463989	other_rna	other RNA
AT4G33370	4.89562	4.8731	4.93524	5.00284	4.86675	8.40846	4.86347	4.83755	0.0187946	2.42248e-05	protein_coding	DEA(D/H)-box RNA helicase family protein
AT4G35180	6.99187	8.51974	5.97005	7.34111	7.4974	8.36329	6.23898	7.30242	9.78034e-11	4.93436e-08	protein_coding	LYS/HIS transporter 7
AT4G35640	10.434	11.2028	10.6833	10.7497	9.73899	11.1082	9.83273	10.1126	0.00865294	0.00796474	protein_coding	serine acetyltransferase 3;2
AT4G37740	10.0354	9.9991	10.2828	10.1534	9.78949	10.8511	10.0975	9.98581	2.83863e-05	1.03029e-07	protein_coding	growth-regulating factor 2
AT4G37900	7.16353	8.9284	7.66938	8.33868	7.45937	10.159	7.4789	8.75261	5.03508e-06	5.12867e-05	protein_coding	Protein of unknown function (duplicated DUF1399)
AT4G37970	8.37357	8.93426	8.03797	8.03767	8.72224	9.28361	8.12504	8.17811	0.676591	2.0383e-08	protein_coding	cinnamyl alcohol dehydrogenase 6
AT5G01050	8.9987	10.2331	9.42522	9.72487	9.4919	10.3782	9.24763	9.75826	0.274062	0.000196315	protein_coding	Laccase/Diphenol oxidase family protein
AT5G01220	11.1256	11.7865	10.9889	11.4717	10.966	11.677	10.7543	11.1542	8.41058e-09	0.00648001	protein_coding	sulfoquinovosyldiacylglycerol 2
AT5G01640	6.35306	8.41432	6.89647	8.06126	6.68145	11.5864	6.7489	8.00116	0.912239	0.0226016	protein_coding	prenylated RAB acceptor 1.B5
AT5G04720	11.5087	12.1986	11.5055	12.2455	11.9512	12.6861	11.6777	12.4873	0.0219912	3.41516e-05	protein_coding	ADR1-like 2
AT5G06755	4.98033	5.94599	4.94206	5.51278	4.93552	5.68163	4.81917	5.03534	0.00612931	0.0470293	protein_coding
AT5G09290	8.40342	8.76188	8.74512	8.72525	8.94506	9.44105	8.55917	8.76301	0.000958215	1.48674e-06	protein_coding	Inositol monophosphatase family protein
AT5G09800	9.24614	9.95717	8.94759	9.32175	9.29556	9.9392	8.516	9.18644	0.0467145	7.8017e-09	protein_coding	ARM repeat superfamily protein
AT5G10000	4.91235	5.84314	4.81472	5.30405	4.7751	5.56508	5.08308	5.04801	1.95793e-05	0.000102429	protein_coding	ferredoxin 4
AT5G11590	9.00764	9.19751	9.50599	8.79513	8.97575	9.8307	9.62598	9.03049	0.00202567	3.23239e-05	protein_coding	Integrase-type DNA-binding superfamily protein
AT5G11840	10.8593	11.2917	10.5729	10.9882	11.1981	11.6374	11.1161	11.4118	1.01881e-05	0.00136111	protein_coding	Protein of unknown function (DUF1230)
AT5G11920	9.05752	9.39669	10.1822	9.81695	10.2589	11.2523	9.97138	9.83889	0.183188	1.9705e-09	protein_coding	6-&1-fructan exohydrolase			development
AT5G13210	9.19629	9.66365	8.53955	8.61884	8.75236	10.2305	8.26802	9.19177	0.824791	8.21883e-07	protein_coding	Uncharacterised conserved protein UCP015417, vWA
AT5G14020	9.59431	8.46511	10.1855	9.15403	9.41169	10.3773	9.81666	8.82203	1.449e-05	7.32878e-06	protein_coding	Endosomal targeting BRO1-like domain-containing protein
AT5G14890	5.56435	6.17507	5.34998	5.55187	5.53023	6.52038	5.40899	5.86564	8.50316e-06	3.34182e-06	protein_coding	NHL domain-containing protein
AT5G14940	9.22553	9.81023	8.93647	9.19923	9.03767	10.0498	9.13796	9.40781	0.000111206	6.0671e-06	protein_coding	Major facilitator superfamily protein
AT5G15130	8.9015	8.7196	8.98759	8.44858	9.0555	10.1142	8.68246	8.72066	8.41439e-05	0.00583196	protein_coding	WRKY DNA-binding protein 72
AT5G15450	14.1422	14.7446	13.7061	14.2914	14.2645	14.8349	13.9023	14.3597	0.500885	0.000224922	protein_coding	casein lytic proteinase B3
AT5G17460	5.53607	6.4371	5.51153	5.32346	5.60462	6.10692	5.20841	5.42055	0.797087	2.8993e-06	protein_coding
AT5G17500	4.6844	6.38317	4.85972	5.11992	4.80753	5.80424	4.90531	5.13682	0.0161769	5.66374e-09	protein_coding	Glycosyl hydrolase superfamily protein
AT5G17795	4.77679	4.76173	4.61851	4.74972	4.73005	8.82769	4.91598	4.79422	3.16422e-09	3.30014e-07	protein_coding
AT5G18360	6.03276	6.61341	6.1595	6.42432	6.07727	6.77901	5.7115	6.03858	8.15952e-09	0.0238657	protein_coding	Disease resistance protein (TIR-NBS-LRR class) family
AT5G18755	11.7812	11.1627	11.8567	11.3597	11.8311	12.6701	12.0582	11.4021	0.569024	2.36586e-07	pre_trna	pre-tRNA
AT5G19650	6.6292	6.46497	6.74735	6.25611	6.80326	7.3019	6.59948	6.47489	0.00100124	0.00129604	protein_coding	ovate family protein 8
AT5G19880	4.8089	5.41965	4.81433	5.1954	4.93522	5.88722	4.98343	5.16838	4.13007e-08	9.70204e-10	protein_coding	Peroxidase superfamily protein
AT5G20150	13.2277	13.9786	12.7461	13.4941	13.6094	14.121	12.4704	13.6465	1.14715e-09	0.0273108	protein_coding	SPX domain gene 1
AT5G22315	5.34426	5.05958	5.29209	5.05008	5.35325	9.25364	5.49699	4.94402	8.57872e-06	3.43518e-08	pre_trna	pre-tRNA
AT5G22380	5.49354	6.52658	5.46304	6.02243	5.86792	7.04443	5.46602	6.2525	0.954156	0.0286405	protein_coding	NAC domain containing protein 90
AT5G24040	5.71934	6.37169	5.53093	5.35895	5.6966	7.17592	5.35349	5.5143	1.01984e-05	2.13649e-07	protein_coding	Protein of unknown function (DUF295)
AT5G24380	12.4591	13.2132	11.7898	12.4163	12.2686	12.9831	11.8491	12.3005	0.625607	4.09522e-10	protein_coding	YELLOW STRIPE like 2
AT5G27310	5.08618	5.34005	4.92206	5.23705	4.64164	5.72325	4.59606	5.49403	7.38304e-05	0.00963969	protein_coding	Transcription factor IIS family protein
AT5G28630	8.1283	9.64812	8.02314	8.7278	8.67311	10.4313	8.20339	9.3769	2.74223e-15	2.00415e-07	protein_coding	glycine-rich protein
AT5G28960	7.43812	7.56888	6.90514	7.21674	7.87929	8.09535	7.33826	7.75583	0.00127619	1.32063e-06	protein_coding
AT5G32475	4.68979	4.8573	4.78229	4.83921	4.99558	8.60002	4.71312	4.87965	2.49899e-06	0.017213	transposable_element_gene	transposable element gene
AT5G35300	5.35695	5.36643	5.40847	5.20954	5.58777	6.56191	5.35276	5.30918	0.39405	0.000267332	protein_coding
AT5G35580	9.71629	11.3303	9.47338	10.2145	9.96525	11.9759	9.5439	10.8301	1.59184e-09	3.87952e-08	protein_coding	Protein kinase superfamily protein
AT5G36720	4.95167	4.80212	4.85495	4.76794	4.98905	6.89871	4.8615	4.84625	0.141452	7.41962e-06	protein_coding	Plant thionin family protein
AT5G37385	5.23679	6.10181	4.96552	5.0584	6.53035	7.77841	5.41993	6.0637	0.000299388	3.37997e-05	transposable_element_gene	transposable element gene
AT5G38700	6.77702	8.28142	7.03582	7.14803	7.0121	8.18619	6.9889	7.27959	0.569635	8.17316e-07	protein_coding
AT5G39100	5.2365	6.3372	5.16976	5.74582	6.16923	7.84355	5.57063	6.65287	6.41208e-07	0.0105707	protein_coding	germin-like protein 6
AT5G40010	6.42794	7.6391	6.46553	7.23297	7.14751	8.11452	6.63003	7.89539	0.126009	8.26364e-08	protein_coding	AAA-ATPase 1
AT5G40770	5.24899	6.26028	4.87876	5.56151	5.25851	6.73016	5.25873	6.05677	0.158491	0.00125865	protein_coding	prohibitin 3
AT5G40920	8.48573	9.16194	8.03734	8.36072	8.54845	8.97464	8.21611	8.75367	7.01529e-11	0.000314367	pseudogene
AT5G40942	9.23167	9.20576	8.45936	8.268	9.24903	10.9534	8.62334	8.22665	8.70008e-06	0.0288089	pseudogene
AT5G43380	9.18435	9.78458	8.77182	9.23161	9.45389	9.96258	9.04259	9.33184	0.49661	0.000275006	protein_coding	type one serine/threonine protein phosphatase 6
AT5G43890	7.64673	9.48466	7.30856	8.60593	7.59908	9.49038	7.88529	8.77104	0.0288095	1.97067e-09	protein_coding	Flavin-binding monooxygenase family protein
AT5G47920	8.26262	8.97111	7.81361	8.6644	8.64763	9.58161	8.26589	9.04824	0.00019493	0.000123442	protein_coding
AT5G50120	9.39666	10.1997	9.03113	8.72488	9.14556	10.045	8.42886	8.43069	0.35341	0.014003	protein_coding	Transducin/WD40 repeat-like superfamily protein
AT5G51920	7.9695	8.73987	7.75062	7.7614	8.26373	9.18655	8.25419	8.44961	5.04033e-06	0.000174054	protein_coding	Pyridoxal phosphate (PLP)-dependent transferases superfamily protein
AT5G52065	4.81029	4.86771	4.84741	4.87828	4.70193	6.68666	4.93986	4.73053	1.0828e-07	3.00532e-07	transposable_element_gene	transposable element gene
AT5G52670	6.95633	8.64712	6.08276	8.02033	8.55394	10.3547	7.27768	8.42179	7.1848e-10	0.00541761	protein_coding	Copper transport protein family
AT5G53480	11.4677	12.1088	11.076	11.6271	11.7534	12.3459	11.7949	12.1284	0.985893	0.000335584	protein_coding	ARM repeat superfamily protein
AT5G53592	4.95334	4.83524	5.67131	5.22696	5.3765	7.20887	5.57747	5.29575	1.61192e-06	0.00672459	protein_coding	FBD-like domain family protein
AT5G54100	9.93282	9.86274	9.71822	9.25196	10.0893	11.1074	9.97309	10.0905	0.496788	3.42769e-07	protein_coding	SPFH/Band 7/PHB domain-containing membrane-associated protein family
AT5G54450	5.10389	5.85589	5.14626	5.35314	4.89853	7.53898	4.8897	5.86781	3.41601e-08	2.33354e-08	protein_coding	Protein of unknown function (DUF295)
AT5G54610	4.87929	5.11987	5.00181	4.98235	6.1474	6.49199	5.11208	5.29815	8.10251e-10	0.00593939	protein_coding	ankyrin
AT5G56050	7.2983	8.16923	7.11772	7.75333	7.89778	8.47387	7.41296	8.27262	1.18931e-06	0.00723722	protein_coding
AT5G58120	7.14454	8.06958	6.53632	7.74137	8.76361	9.02108	8.56112	9.36889	1.44819e-05	2.46156e-06	protein_coding	Disease resistance protein (TIR-NBS-LRR class) family
AT5G59660	8.53537	9.33049	8.13202	8.85388	9.09046	9.65933	8.9457	9.24081	6.89657e-09	0.000425255	protein_coding	Leucine-rich repeat protein kinase family protein
AT5G60180	5.83971	6.55278	5.60104	6.11956	6.15222	7.55268	5.97834	6.97868	0.834422	1.2998e-09	protein_coding	pumilio 19
AT5G60350	4.83172	6.57547	4.85893	5.30394	5.22892	7.18485	5.09416	5.43745	0.824082	0.000149753	protein_coding
AT5G60900	6.21345	6.56091	6.06363	5.87429	6.57294	7.04773	6.02293	6.45128	8.23597e-07	2.88383e-06	protein_coding	receptor-like protein kinase 1
AT5G62420	7.06074	8.70048	7.16011	7.85159	7.1071	9.80116	7.14419	8.54827	2.06808e-06	0.000232935	protein_coding	NAD(P)-linked oxidoreductase superfamily protein
AT5G62998	4.73972	4.65195	4.98537	4.89087	5.06357	6.10767	4.95978	4.92531	1.76295e-11	1.6737e-05	protein_coding
AT5G63390	5.76523	6.38975	5.92409	6.07791	5.45414	6.18906	5.38062	5.9379	0.366593	0.00455669	protein_coding	O-fucosyltransferase family protein
AT5G65010	15.4862	16.0244	14.964	15.3134	15.9877	16.4207	15.9504	15.9853	0.000842124	0.0170668	protein_coding	asparagine synthetase 2
AT5G65560	7.73415	8.06607	7.4022	7.97395	8.05981	8.49985	7.78346	8.32051	7.38676e-10	0.00197755	protein_coding	Pentatricopeptide repeat (PPR) superfamily protein
1) Genes with a significant change in expression were selected using the following criteria: an expression log_2 ratio > 0.5 and a controlled p-value
(FDR; Benjamini and Hochberg, 1995) from t-test analysis < 0.05 in WT, hda19-3, quad, and quint between normal and salinity stress conditions.
																	0
																	0
																	0
																	0
																	0
																	0
																	0
																	0
																	0
																	0
																	0
																	0
																	0
																	0
																	0
																	0
																	0
																	0
																	0
																	0
																	0
																	0
																	0
																	0
																	0
																	0
																	0
																	0
																	0
																	0
																	0
																	0
																	0
																	0
																	0
																	0
																	0
																	0
																	0
																	0
																	0
																	0
																	0
																	0
																	0
																	0
																	0
																	0
																	0
																	0
																	0
																	0
																	0
																	0
																	0
																	0
																	0
																	0
																	0
																	0
																	0
																	0
																	0
																	0
																	0
																	0
																	0
																	0
																	0
																	0
																	0
																	0
																	0
																	0
																	0
																	0
																	0
																	0
																	0
																	0
																	0
																	0
																	0
																	0
																	0
																	0
																	0
																	0
																	0
																	0
																	0
																	0
																	0
																	0
																	0
																	0
																	0

## Sheet: S5
Supplemental Table S5. Genes classified into Group 3 in Figure 1C
AGI code	Col-0	Col-0 NaCl	hda19	hda19 NaCl	quad	quad NaCl	quint	quint NaCl	one-way ANOVA	BH FDR	function	annotation
AT1G01360	10.1625	10.7915	10.3773	10.9428	10.2314	11.2354	10.5461	11.3675	5.48047e-06	6.97486e-09	protein_coding	regulatory component of ABA receptor 1
AT1G01480	7.13268	11.0706	7.04263	10.5661	7.25278	11.3434	7.17733	10.9814	8.14017e-10	3.74175e-07	protein_coding	1-amino-cyclopropane-1-carboxylate synthase 2
AT1G01520	7.73187	10.2761	7.75766	10.5244	7.44224	10.7104	7.55019	11.2691	0.493797	8.3816e-05	protein_coding	Homeodomain-like superfamily protein
AT1G01580	8.85314	9.59728	8.2935	8.53409	8.60836	8.39483	8.25884	8.82822	2.35829e-11	0.0248997	protein_coding	ferric reduction oxidase 2
AT1G02230	5.91358	7.02795	6.60874	6.84714	6.24663	7.27437	6.61423	7.36541	9.76398e-07	0.043938	protein_coding	NAC domain containing protein 4
AT1G02400	8.8398	11.3141	9.29506	11.4804	8.5289	10.858	8.88769	11.6233	0.0370404	8.4203e-05	protein_coding	gibberellin 2-oxidase 6
AT1G02450	5.8337	7.25602	6.84137	7.7229	6.61666	8.27398	6.49629	8.37862	7.14396e-09	1.81915e-08	protein_coding	NIM1-interacting 1
AT1G02520	10.1958	11.9437	10.8871	11.8219	9.98783	12.9995	10.1831	12.2199	0.954514	1.22239e-07	protein_coding	P-glycoprotein 11
AT1G02530	9.27398	10.7517	9.79138	10.5972	8.94084	11.8363	9.25706	11.1737	1.89941e-06	0.000286844	protein_coding	P-glycoprotein 12
AT1G02660	8.49386	10.1001	8.29679	10.5442	8.89735	9.87774	8.79083	10.896	1.39576e-10	0.00240765	protein_coding	alpha/beta-Hydrolases superfamily protein
AT1G02920	12.5228	12.9804	11.8349	12.4226	12.2141	12.5402	11.4316	12.0145	2.84951e-06	0.00158122	protein_coding	glutathione S-transferase 7
AT1G03740	11.2781	12.0897	11.3918	12.0222	11.3764	12.442	11.3276	12.0554	0.734794	9.16514e-05	protein_coding	Protein kinase superfamily protein
AT1G03970	11.1355	12.0434	11.0809	11.715	11.2608	12.1837	11.2642	12.0357	9.16269e-07	0.000163514	protein_coding	G-box binding factor 4
AT1G04220	10.8974	13.2873	10.3688	14.1833	10.8547	12.892	10.5514	14.2573	6.63923e-06	0.00178008	protein_coding	3-ketoacyl-CoA synthase 2
AT1G04310	7.4254	8.69267	7.3764	8.79938	7.62771	8.91886	7.79392	9.08418	1.84226e-06	0.00116775	protein_coding	ethylene response sensor 2
AT1G04445	4.85397	6.19675	5.38726	6.09386	4.66588	6.68459	4.81922	6.39201	0.141455	1.38282e-05	protein_coding	C2H2-like zinc finger protein
AT1G05100	6.8913	11.1598	7.08384	11.8534	6.88238	10.6205	7.04133	12.409	2.75403e-09	1.81029e-06	protein_coding	mitogen-activated protein kinase kinase kinase 18
AT1G05170	7.03398	7.82686	6.98973	7.71283	7.08867	7.99948	7.10146	8.08092	1.20585e-06	1.72306e-07	protein_coding	Galactosyltransferase family protein
AT1G05340	8.12807	12.5281	8.92051	12.7839	8.51965	11.7673	8.75239	12.5051	0.0239259	0.00136958	protein_coding
AT1G05575	7.6186	11.1369	8.278	10.5081	7.89727	11.0345	7.9599	10.9336	4.38264e-07	2.70989e-09	protein_coding
AT1G05675	5.87359	7.77639	5.18107	7.9138	5.47774	6.76097	5.21469	8.25564	5.01001e-09	1.23988e-09	protein_coding	UDP-Glycosyltransferase superfamily protein
AT1G05800	4.76363	5.86077	4.71937	5.99024	4.68296	5.15909	4.89343	5.79573	0.00591238	6.76277e-06	protein_coding	alpha/beta-Hydrolases superfamily protein
AT1G05870	11.3666	12.3645	11.7663	12.6606	11.4698	12.7236	11.8772	13.03	0.026039	0.00285915	protein_coding	Protein of unknown function (DUF1685)
AT1G07000	9.04224	10.8852	9.3576	10.4433	9.2833	11.2914	9.25733	10.7062	0.963064	1.53071e-05	protein_coding	exocyst subunit exo70 family protein B2
AT1G07135	11.3599	14.6542	11.7019	14.257	11.6087	14.6149	11.6799	14.5529	0.000454482	9.33772e-06	protein_coding	glycine-rich protein
AT1G07160	6.7541	8.83189	6.599	7.77361	6.35229	7.78585	6.23103	8.25976	3.67757e-16	1.50835e-10	protein_coding	Protein phosphatase 2C family protein
AT1G07280	9.86432	10.2851	9.42322	10.2661	9.959	10.5444	9.81811	10.6821	0.0157584	0.000199695	protein_coding	Tetratricopeptide repeat (TPR)-like superfamily protein
AT1G07430	6.32186	11.6781	6.90447	11.4283	6.03743	11.3806	6.60812	11.9798	0.424506	0.00170612	protein_coding	highly ABA-induced PP2C gene 2
AT1G07500	5.8791	9.50472	6.08596	8.73813	5.80997	8.7913	6.03126	9.07029	3.77936e-10	4.47135e-08	protein_coding
AT1G07520	10.7234	11.4489	10.5418	11.126	10.6602	11.954	10.4437	11.2573	0.094308	9.78085e-11	protein_coding	GRAS family transcription factor
AT1G07590	8.56042	9.73461	8.51023	9.27043	8.82165	10.2239	8.6908	9.48239	0.000493039	8.09864e-11	protein_coding	Tetratricopeptide repeat (TPR)-like superfamily protein
AT1G07720	10.1164	10.8966	9.47067	11.5225	10.1252	11.0606	10.0622	11.9009	0.0146014	1.35048e-05	protein_coding	3-ketoacyl-CoA synthase 3
AT1G07850	5.37923	6.02954	4.96355	5.67546	5.1402	6.21504	4.86255	6.01411	0.0887023	0.0209367	protein_coding	Protein of unknown function (DUF604)
AT1G07860	5.12554	8.3929	4.94082	6.88795	4.83983	9.08814	4.80603	7.7364	2.81858e-05	2.96841e-08	protein_coding
AT1G07870	9.55628	10.9809	9.83372	10.8362	9.79543	11.2507	9.96785	11.2835	3.60957e-08	7.6823e-08	protein_coding	Protein kinase superfamily protein
AT1G08050	9.27386	10.5415	9.59535	10.7509	9.33973	10.3794	9.38414	10.4747	0.423554	3.82745e-09	protein_coding	Zinc finger (C3HC4-type RING finger) family protein
AT1G08230	6.54391	7.61739	6.62634	7.80952	6.67469	7.3819	6.38048	7.55492	1.94142e-06	4.70327e-10	protein_coding	Transmembrane amino acid transporter family protein
AT1G08650	10.1625	12.1052	9.86486	11.3236	9.91634	11.7654	9.72147	11.4682	2.08821e-07	0.0187623	protein_coding	phosphoenolpyruvate carboxylase kinase 1
AT1G08860	5.68853	8.4128	5.6431	7.90197	5.37419	8.04185	5.56901	8.40217	0.235125	0.000863559	protein_coding	Calcium-dependent phospholipid-binding Copine family protein
AT1G09070	10.3382	11.8293	10.1484	12.0121	10.8261	11.6047	10.4328	12.081	0.33904	6.38687e-06	protein_coding	soybean gene regulated by cold-2
AT1G09157	5.58905	7.90515	5.28956	6.72671	5.61948	8.23771	5.11606	7.34165	0.00992994	0.00250856	protein_coding	Protein of unknown function (DUF679)
AT1G09180	6.32205	6.92138	5.91879	7.11912	6.14853	6.86694	6.10442	7.6112	1.37637e-09	0.0218728	protein_coding	secretion-associated RAS super family 1
AT1G09520	11.5917	12.2173	11.6384	12.5663	11.7881	12.6081	11.7637	12.8153	4.96158e-08	6.40644e-05	protein_coding
AT1G09530	11.2025	12.3131	11.4526	12.3135	11.1408	12.0607	11.4873	12.1247	0.0826497	0.0159667	protein_coding	phytochrome interacting factor 3
AT1G09932	9.35751	12.6081	9.07538	11.5038	9.97492	12.5183	9.44996	11.8263	1.96846e-06	0.00035594	protein_coding	Phosphoglycerate mutase family protein
AT1G10060	8.60953	9.06926	7.43686	8.09347	8.20824	8.67641	7.82503	8.51169	3.1039e-06	0.000604905	protein_coding	branched-chain amino acid transaminase 1
AT1G10155	6.72014	7.47989	7.13699	7.18952	6.76581	7.88162	7.53665	7.87533	0.00421312	0.00113817	protein_coding	phloem protein 2-A10
AT1G10170	10.9643	11.9033	10.9564	12.0407	11.1209	12.1348	11.1195	12.1709	0.947939	0.00180792	protein_coding	NF-X-like 1
AT1G10585	6.35473	7.49102	5.63091	7.55179	6.88112	7.23427	6.43192	8.25585	9.46817e-21	1.28694e-08	protein_coding	basic helix-loop-helix (bHLH) DNA-binding superfamily protein
AT1G10640	8.80372	10.5102	8.9178	10.3975	8.33473	10.2572	8.96532	11.0123	0.0165955	1.74274e-06	protein_coding	Pectin lyase-like superfamily protein
AT1G11960	9.29802	10.6873	9.44995	10.7939	9.20694	10.5079	9.46005	10.9479	0.176245	9.51519e-07	protein_coding	ERD (early-responsive to dehydration stress) family protein
AT1G12570	7.57446	7.86095	6.44684	7.30929	7.1631	7.57393	6.88292	7.64022	0.345417	2.1943e-08	protein_coding	Glucose-methanol-choline (GMC) oxidoreductase family protein
AT1G12610	4.81756	10.0323	4.58584	9.31573	4.75717	9.31857	4.81444	9.2555	0.0170331	8.97786e-06	protein_coding	Integrase-type DNA-binding superfamily protein
AT1G12845	13.082	14.0058	12.6662	13.5022	12.2288	13.2174	12.4119	13.3137	0.00193834	0.00061786	protein_coding
AT1G12950	7.79492	10.0186	8.69064	9.92861	8.29841	10.303	8.81003	10.2176	1.06521e-06	0.000274754	protein_coding	root hair specific 2
AT1G13310	4.85762	6.02016	5.06825	5.73686	5.00945	6.28061	5.00989	5.92996	0.515075	0.00282035	protein_coding	Endosomal targeting BRO1-like domain-containing protein
AT1G13340	8.21066	11.0191	7.47164	10.0033	8.59034	10.9952	7.7026	10.6192	0.14395	1.08791e-07	protein_coding	Regulator of Vps4 activity in the MVB pathway protein
AT1G13520	6.89437	8.9459	7.26793	8.34232	6.99296	9.25631	6.98058	8.31485	0.0542724	4.99345e-12	protein_coding	Protein of unknown function (DUF1262)
AT1G14200	10.2426	11.1767	10.9087	11.56	10.2828	11.4266	10.8636	11.9555	1.72331e-05	0.0184617	protein_coding	RING/U-box superfamily protein
AT1G14480	8.19863	9.76253	7.93687	8.93898	8.23723	9.44662	7.96675	9.30255	0.00398326	1.01177e-11	protein_coding	Ankyrin repeat family protein
AT1G14520	6.85559	7.64015	6.80286	7.68964	7.00506	7.03723	6.12797	7.27471	0.00244892	3.74974e-09	protein_coding	myo-inositol oxygenase 1
AT1G14540	6.3911	10.7197	7.1401	10.3558	6.37345	11.0873	6.58992	10.6248	0.0013358	1.42648e-07	protein_coding	Peroxidase superfamily protein
AT1G14550	5.59561	9.11679	5.61276	8.48053	5.22045	9.67892	5.71646	7.86927	4.78576e-07	0.000158196	protein_coding	Peroxidase superfamily protein
AT1G14870	12.1209	13.186	12.6673	13.3973	11.9072	13.1373	11.7581	13.0746	0.0289477	6.14606e-07	protein_coding	PLANT CADMIUM RESISTANCE 2
AT1G15010	7.1756	11.2506	7.87853	12.1897	7.41826	10.6742	7.42761	12.1415	4.92633e-08	2.53612e-07	protein_coding
AT1G15550	11.5339	12.5329	11.7071	12.4247	11.1355	12.2124	11.3601	11.974	1.50601e-13	3.94927e-11	protein_coding	gibberellin 3-oxidase 1
AT1G15580	6.87487	8.3504	5.85963	7.18302	6.22143	7.97239	6.04296	7.68002	0.151748	5.95514e-06	protein_coding	indole-3-acetic acid inducible 5
AT1G16110	8.09489	8.9312	7.99995	8.62237	8.04004	9.34477	8.20032	9.16557	6.31893e-05	1.78592e-08	protein_coding	wall associated kinase-like 6
AT1G16670	9.3504	10.6576	9.52374	10.3469	9.61652	10.9907	9.62711	10.6648	4.37829e-06	0.0495847	protein_coding	Protein kinase superfamily protein
AT1G16850	8.52562	10.9132	8.80501	12.0437	8.32585	10.2647	8.42327	11.5961	4.20992e-10	0.000369009	protein_coding
AT1G17170	13.6991	13.9536	12.3158	13.0111	12.7809	12.7941	11.6849	12.7436	4.80398e-08	3.81774e-11	protein_coding	glutathione S-transferase TAU 24
AT1G17420	11.071	13.538	10.7581	14.2082	11.0303	12.7669	11.0139	13.9761	0.117359	0.00524634	protein_coding	lipoxygenase 3
AT1G17710	5.39968	6.5145	5.97386	6.62733	5.32366	5.84798	5.46289	5.91824	1.23278e-07	0.00457812	protein_coding	Pyridoxal phosphate phosphatase-related protein
AT1G17750	9.46805	10.9824	9.10012	10.7246	9.31471	10.4262	8.91782	10.2233	0.0901178	0.00189236	protein_coding	PEP1 receptor 2
AT1G19050	10.7849	11.9965	10.4656	11.2984	10.772	12.3506	10.8257	12.16	2.12436e-08	5.8958e-08	protein_coding	response regulator 7
AT1G19970	9.61186	11.0197	9.67611	11.7187	9.7288	10.8188	9.56843	11.8381	0.228471	0.00388517	protein_coding	ER lumen protein retaining receptor family protein
AT1G20310	6.25071	9.0724	7.07349	8.08513	6.70009	9.04854	6.98437	8.48824	1.89462e-05	0.000727383	protein_coding
AT1G20440	6.19334	9.35733	6.49402	9.12431	6.03528	8.40277	5.96526	8.85982	6.01852e-07	0.00434834	protein_coding	cold-regulated 47
AT1G20450	10.6731	13.2746	10.6037	14.0697	10.7457	13.031	10.4634	14.2088	0.778195	1.18616e-07	protein_coding	Dehydrin family protein
AT1G20510	10.4794	12.1017	10.3102	12.2902	10.6682	11.6428	10.314	12.3018	1.26459e-08	0.000237088	protein_coding	OPC-8:0 CoA ligase1
AT1G20823	10.9326	13.1534	10.5297	12.0911	11.135	13.1814	10.4656	12.2649	0.615888	0.00159747	protein_coding	RING/U-box superfamily protein
AT1G21110	12.0143	12.9131	12.631	12.9984	11.8217	13.4485	12.3499	13.0787	0.11656	7.19144e-07	protein_coding	O-methyltransferase family protein
AT1G21140	8.18823	11.0992	7.67357	10.1551	8.33687	11.7275	8.49156	11.0355	0.000484095	1.20013e-06	protein_coding	Vacuolar iron transporter (VIT) family protein
AT1G21910	10.6547	11.6212	9.63877	11.2113	10.8141	11.4545	10.507	11.3359	4.85672e-07	4.77224e-06	protein_coding	Integrase-type DNA-binding superfamily protein
AT1G22280	12.2054	13.3096	12.2729	13.2817	12.3288	13.569	12.4234	13.3875	0.385029	0.00227418	protein_coding	phytochrome-associated protein phosphatase type 2C
AT1G22350	9.88649	10.5187	8.56892	9.83435	10.1231	10.8607	9.20333	10.6773	0.00202133	0.0331475	pseudogene
AT1G22470	6.7485	8.06093	6.41519	7.97509	6.62516	7.5247	6.30718	7.95692	1.07962e-06	3.75463e-09	protein_coding
AT1G22710	8.49658	9.53943	8.41416	9.87066	8.61866	9.45539	8.17097	9.8464	0.000778761	4.19179e-08	protein_coding	sucrose-proton symporter 2
AT1G22810	5.22164	10.0394	5.39237	9.92062	5.15372	9.56971	5.26318	10.3305	3.63741e-10	3.0354e-12	protein_coding	Integrase-type DNA-binding superfamily protein
AT1G23710	9.09114	11.6236	9.37168	11.2469	9.14027	11.7561	9.35544	11.8608	1.14472e-07	1.3e-07	protein_coding	Protein of unknown function (DUF1645)
AT1G24140	6.62205	10.425	6.09339	9.15204	6.69526	10.4314	5.74892	9.52555	0.000112003	5.60425e-06	protein_coding	Matrixin family protein
AT1G24600	8.25264	10.818	8.10917	11.1792	8.60171	10.2483	8.3159	11.7514	0.477197	9.22544e-13	protein_coding
AT1G25400	6.76824	7.92672	6.88189	7.94794	6.91957	7.70375	6.97008	8.18679	5.84183e-06	0.00336049	protein_coding
AT1G25682	5.88843	6.65003	5.83311	6.45687	6.16553	7.06336	5.92355	6.74228	0.0365931	8.13748e-08	protein_coding	Family of unknown function (DUF572)
AT1G26140	5.07074	5.66731	4.96229	6.01787	4.69317	5.62702	4.83879	5.72962	1.22151e-07	1.19421e-10	protein_coding
AT1G26450	10.0108	10.7887	9.83088	10.819	9.78522	10.3695	9.44537	10.3872	7.72172e-08	5.41454e-05	protein_coding	Carbohydrate-binding X8 domain superfamily protein
AT1G26730	6.53021	8.46781	6.61298	8.4502	6.84549	8.5312	6.42264	8.26463	3.09049e-10	9.43727e-08	protein_coding	EXS (ERD1/XPR1/SYG1) family protein
AT1G26770	11.9413	14.7484	11.9425	14.2414	11.6743	14.4395	11.7183	14.1873	8.90917e-12	0.00131723	protein_coding	expansin A10
AT1G27130	7.01441	8.63647	6.87859	7.86357	6.92558	8.72654	6.65494	8.10477	0.0636016	9.28493e-05	protein_coding	glutathione S-transferase tau 13
AT1G27730	9.63932	14.5465	10.106	13.6604	10.3584	14.2678	10.2513	14.1137	3.37002e-07	3.01474e-05	protein_coding	salt tolerance zinc finger
AT1G27770	7.14534	8.23863	7.35504	8.38451	7.53201	8.43559	7.39949	8.41162	4.42558e-07	5.00766e-10	protein_coding	autoinhibited Ca2+-ATPase 1
AT1G28480	7.76916	13.6379	8.49813	13.0188	8.46765	13.606	8.36685	13.4352	0.785852	9.764e-08	protein_coding	Thioredoxin superfamily protein
AT1G28520	11.2977	12.1292	11.2842	12.5174	11.8122	12.5201	11.7894	12.7394	0.13152	1.61948e-07	protein_coding	vascular plant one zinc finger protein
AT1G29230	5.9967	6.92547	6.03751	7.27168	6.07889	7.06735	5.89188	7.20091	2.32296e-07	1.35891e-09	protein_coding	CBL-interacting protein kinase 18
AT1G29290	7.7167	10.1614	8.62821	10.4224	8.12131	10.9387	8.60356	10.7981	0.0704377	0.000184146	protein_coding
AT1G29770	4.94507	5.86111	4.9041	5.91706	4.8469	5.90571	4.80819	5.43267	7.98949e-07	0.000317508	protein_coding	Haloacid dehalogenase-like hydrolase (HAD) superfamily protein
AT1G29920	9.34456	9.99057	8.92437	9.91525	9.53329	9.82034	9.23304	10.1904	0.0847102	0.000478902	protein_coding	chlorophyll A/B-binding protein 2
AT1G30190	5.34494	10.9374	5.36477	9.44054	5.23843	10.5175	5.41843	10.4119	0.000228734	0.020308	protein_coding
AT1G30250	5.23403	6.1186	5.25041	6.16925	5.13131	6.60507	5.01456	6.43204	6.42025e-06	0.000192659	protein_coding
AT1G30320	11.0126	12.137	11.3102	12.2995	10.947	12.1566	11.2421	12.4605	0.17236	0.0428654	protein_coding	Remorin family protein
AT1G30370	7.07916	10.8528	7.26242	10.0163	7.58172	11.4248	7.30104	10.4413	2.61733e-06	6.7841e-06	protein_coding	alpha/beta-Hydrolases superfamily protein
AT1G30455	4.75175	6.24973	5.06762	6.2568	4.67898	6.23022	4.71549	6.3053	0.00115828	0.0127296	protein_coding	transcription regulators;translation initiation factors;zinc ion binding;transcription activators
AT1G30720	10.2472	11.3884	10.5272	12.1814	10.3713	11.9843	10.2356	12.0849	0.289299	2.65507e-12	protein_coding	FAD-binding Berberine family protein
AT1G30730	7.59142	10.8764	7.75499	11.0174	7.5251	11.2108	7.44288	10.9559	0.000109182	8.89573e-05	protein_coding	FAD-binding Berberine family protein
AT1G31290	6.36958	9.51441	5.79597	8.35989	5.42446	7.80614	5.76055	8.15665	0.000845181	0.000497204	protein_coding	ARGONAUTE 3
AT1G32640	10.9957	14.0273	11.6077	13.8765	11.1613	13.7357	11.4914	13.9472	0.0311385	0.0191291	protein_coding	Basic helix-loop-helix (bHLH) DNA-binding family protein
AT1G32870	9.95681	12.296	10.3238	12.298	10.2514	12.6908	10.4867	12.782	0.599288	4.14666e-08	protein_coding	NAC domain protein 13
AT1G33120	7.55383	8.52785	7.63515	8.08607	7.71442	8.64814	7.55524	8.3989	8.29691e-07	4.65983e-06	protein_coding	Ribosomal protein L6 family
AT1G33160	4.8408	7.18062	4.79612	7.19885	4.89698	7.37758	4.95017	7.52155	2.0629e-07	0.000241508	pseudogene
AT1G33510	5.01893	5.66715	4.8204	5.8851	4.96016	4.97413	4.88111	4.84351	0.0768098	2.57933e-07	pseudogene
AT1G33760	5.81342	7.45364	5.51453	7.83242	6.28457	6.77749	5.82965	8.24238	2.75913e-10	3.43749e-08	protein_coding	Integrase-type DNA-binding superfamily protein
AT1G35910	6.91873	7.9536	6.30293	7.72928	6.9573	8.56502	6.36231	7.69029	1.60314e-13	1.17018e-06	protein_coding	Haloacid dehalogenase-like hydrolase (HAD) superfamily protein
AT1G36770	9.90119	10.6373	9.9865	10.9566	9.70696	10.2389	9.96893	10.9508	0.0803379	1.57716e-06	transposable_element_gene	transposable element gene
AT1G42980	5.16612	6.71122	4.84238	6.41129	5.12453	7.02557	4.78629	6.84931	0.0958448	7.59198e-08	protein_coding	Actin-binding FH2 (formin homology 2) family protein
AT1G43000	5.78809	7.35939	5.6762	6.48074	5.72934	7.07622	5.57775	6.59009	1.07785e-06	0.0274524	protein_coding	PLATZ transcription factor family protein
AT1G43910	11.4187	12.8032	11.0596	12.7922	12.0566	13.3283	11.2638	12.8824	0.182761	1.74441e-05	protein_coding	P-loop containing nucleoside triphosphate hydrolases superfamily protein
AT1G45249	9.79559	11.5792	9.77332	11.33	9.79274	11.5846	9.765	11.664	4.31849e-08	0.0492881	protein_coding	abscisic acid responsive elements-binding factor 2
AT1G46768	9.1414	9.52616	9.19632	9.86506	9.13287	9.78237	9.36236	10.2288	7.5097e-06	0.00902358	protein_coding	related to AP2 1
AT1G47960	4.92407	6.22835	5.15869	5.68673	4.94684	6.05762	4.90143	5.831	0.124662	1.25705e-11	protein_coding	cell wall / vacuolar inhibitor of fructosidase 1
AT1G47990	6.58738	7.89475	6.8505	7.95233	6.61329	7.91493	7.176	8.20492	6.98233e-06	0.00920419	protein_coding	gibberellin 2-oxidase 4
AT1G48100	9.74397	13.2096	9.81249	13.3269	9.62233	13.3694	9.35788	13.7523	4.46624e-10	1.00499e-06	protein_coding	Pectin lyase-like superfamily protein
AT1G50260	6.39608	6.68522	6.26697	6.73783	6.19943	6.54939	6.41729	7.27011	0.00171607	0.00106787	protein_coding	N-terminal-transmembrane-C2 domain type 5.1
AT1G50590	8.72289	10.4245	8.88892	9.30698	8.62444	10.6317	8.29476	9.65865	4.72708e-06	7.38784e-06	protein_coding	RmlC-like cupins superfamily protein
AT1G51170	8.37027	9.36314	8.74128	9.04486	8.34265	9.49004	8.46322	9.16424	0.57909	4.08007e-10	protein_coding	Protein kinase superfamily protein
AT1G51620	8.3653	10.3701	7.84838	9.52254	8.23153	9.47972	7.82703	9.78878	9.31228e-05	0.00120487	protein_coding	Protein kinase superfamily protein
AT1G51670	5.91586	7.9954	6.25973	6.63655	5.67935	7.90278	5.5966	6.8244	0.463518	7.27471e-05	protein_coding
AT1G51700	10.0868	11.7414	10.3056	11.5514	10.2525	11.809	10.7305	11.9584	0.946139	1.42597e-08	protein_coding	DOF zinc finger protein 1
AT1G51770	6.20842	7.13757	6.24984	6.78824	5.94925	7.0411	6.01533	7.05381	1.16826e-09	7.87748e-07	protein_coding	Core-2/I-branching beta-1,6-N-acetylglucosaminyltransferase family protein
AT1G51915	4.69096	6.30358	4.86464	5.6208	4.81906	6.60954	4.8548	5.47127	1.58993e-07	0.000322039	protein_coding	cryptdin protein-related
AT1G51920	5.46632	6.89934	5.51729	6.22919	5.20054	6.96789	5.38325	6.10705	1.48863e-05	1.50942e-08	protein_coding
AT1G52080	7.765	8.61067	7.90257	8.74803	7.97328	8.72316	7.97519	8.98741	0.000105175	0.0455303	protein_coding	actin binding protein family
AT1G52690	8.84188	14.3893	10.713	15.4079	8.52249	13.2697	9.06817	15.1762	4.45217e-07	0.0016832	protein_coding	Late embryogenesis abundant protein (LEA) family protein
AT1G52770	6.79928	7.79051	5.87736	6.56363	5.73497	6.89723	5.51751	6.31992	0.470204	7.91279e-06	protein_coding	Phototropic-responsive NPH3 family protein
AT1G52855	6.43643	9.08649	6.61813	9.94799	6.87643	9.33866	7.24276	10.7076	0.00306615	0.000152275	protein_coding
AT1G53110	8.66633	9.53388	8.68665	9.69689	8.6682	9.48513	8.81903	9.8637	0.338864	3.94807e-06	protein_coding
AT1G53163	7.19528	9.52381	7.8725	8.43488	6.96737	9.46398	7.49218	9.59345	1.35245e-09	2.31817e-07	protein_coding
AT1G53170	8.92995	11.0764	9.35296	11.0272	8.95504	10.9385	9.48501	11.4795	0.000188053	5.82333e-08	protein_coding	ethylene response factor 8
AT1G53470	8.83282	10.2856	8.84625	11.1576	8.76771	10.0639	8.90308	10.8784	0.993792	1.86554e-05	protein_coding	mechanosensitive channel of small conductance-like 4
AT1G53560	11.4952	12.5605	11.4361	13.1252	11.3195	12.1104	11.3592	13.1605	4.25876e-07	0.00872714	protein_coding	Ribosomal protein L18ae family
AT1G53620	5.20773	8.608	5.85947	7.45389	5.91859	9.72655	5.73526	7.69357	0.236903	2.31118e-09	protein_coding
AT1G53625	6.35595	9.06879	6.83657	8.57126	6.41685	9.57774	6.75356	8.89841	0.000130565	0.0267188	protein_coding
AT1G53785	6.74737	7.67711	7.4455	7.36982	7.42178	7.62879	7.75279	8.04751	1.47875e-07	3.80924e-06	protein_coding
AT1G54210	7.99158	8.84152	7.90692	8.77074	8.26192	9.06255	8.07341	9.08123	0.000490508	5.83562e-12	protein_coding	Ubiquitin-like superfamily protein
AT1G55450	10.2844	11.2014	10.3555	11.2839	10.3849	11.0278	10.3482	11.5437	1.90233e-09	0.000954066	protein_coding	S-adenosyl-L-methionine-dependent methyltransferases superfamily protein
AT1G55740	9.59031	10.5903	9.62325	9.98356	9.62235	10.5821	9.33635	9.85035	5.92118e-06	0.0430424	protein_coding	seed imbibition 1
AT1G55790	5.32165	8.34464	5.74607	7.31913	5.4158	7.60973	5.67561	6.84068	1.7996e-09	0.030639	protein_coding	Domain of unknown function (DUF2431)
AT1G55990	5.39508	5.84676	5.16993	6.24648	5.14729	5.07656	5.06066	5.14674	0.405701	0.0158831	protein_coding	glycine-rich protein
AT1G56240	6.20814	9.62048	6.63737	9.89184	6.38923	9.23274	6.53894	9.79382	4.79087e-05	0.00340941	protein_coding	phloem protein 2-B13
AT1G56600	6.29051	11.835	6.20513	10.9984	6.41551	10.8176	5.12623	10.8679	0.000359993	0.000272444	protein_coding	galactinol synthase 2
AT1G56660	9.75536	11.3932	10.121	11.9281	9.98743	11.2612	10.1303	11.8206	0.597377	1.69719e-07	protein_coding
AT1G57630	5.60453	7.14711	5.63254	6.10284	5.63138	6.47226	5.79293	6.45838	0.000328393	5.38898e-06	protein_coding	Toll-Interleukin-Resistance (TIR) domain family protein
AT1G58270	8.07142	10.3784	8.68048	10.6285	7.94262	10.3144	8.28585	10.4699	2.26249e-07	0.00157585	protein_coding	TRAF-like family protein
AT1G58320	5.26736	6.11017	5.28548	6.92465	5.84424	7.72877	5.3503	8.637	0.0663879	3.10315e-09	protein_coding	PLAC8 family protein
AT1G58340	9.68288	11.3761	9.11108	11.4878	9.30165	11.5236	8.8622	12.1023	0.00278086	2.15821e-08	protein_coding	MATE efflux family protein
AT1G58420	8.05474	9.36863	7.98338	9.25252	8.04322	9.69306	8.26357	9.62001	6.554e-08	5.61376e-07	protein_coding	Uncharacterised conserved protein UCP031279
AT1G59500	6.64979	9.58226	5.98636	8.42081	6.96097	10.844	6.18798	9.51793	0.361822	0.000602709	protein_coding	Auxin-responsive GH3 family protein
AT1G59590	7.66013	11.6616	8.22199	10.8105	8.06801	12.5601	8.33448	11.6744	2.82905e-10	8.93402e-07	protein_coding	ZCF37
AT1G59620	8.44828	9.63071	8.61867	9.87118	8.76849	9.73741	8.64349	10.2793	0.185941	0.000288799	protein_coding	Disease resistance protein (CC-NBS-LRR class) family
AT1G59650	6.24821	7.46632	6.6064	7.34645	6.48479	7.68618	6.72189	7.54226	3.28751e-05	0.00914731	protein_coding	Protein of unknown function (DUF1336)
AT1G59740	9.11225	10.4435	8.63262	10.2984	8.98266	10.4703	8.91821	10.644	0.398591	4.79941e-07	protein_coding	Major facilitator superfamily protein
AT1G60190	6.59128	13.3747	7.98739	13.5765	6.66459	12.9093	7.45507	14.5175	1.05731e-07	2.65352e-06	protein_coding	ARM repeat superfamily protein
AT1G60590	7.41084	9.31218	7.14501	9.15571	6.7236	9.24753	6.99899	9.50566	4.69444e-08	7.87522e-05	protein_coding	Pectin lyase-like superfamily protein
AT1G60750	10.2756	10.9484	9.85065	10.7632	9.55012	9.96789	9.3211	10.5715	0.14857	0.013444	protein_coding	NAD(P)-linked oxidoreductase superfamily protein
AT1G61290	5.5865	9.33349	5.46715	8.75244	5.42243	9.18328	5.46419	8.25544	0.491186	0.00730252	protein_coding	syntaxin of plants 124
AT1G61560	7.36448	7.98482	7.33369	7.37009	7.11538	8.09	6.72864	7.64176	0.000731189	0.0114202	protein_coding	Seven transmembrane MLO family protein
AT1G61860	7.68774	8.17097	7.40999	8.04493	7.78512	8.46656	7.53213	8.26284	5.12861e-05	0.000153667	protein_coding	Protein kinase superfamily protein
AT1G61890	11.1813	13.2303	11.1937	13.8059	11.2648	12.9922	11.4364	13.6777	0.000111907	6.51337e-08	protein_coding	MATE efflux family protein
AT1G62300	8.79274	10.6447	9.29304	10.873	9.01059	10.7995	9.14524	11.0366	0.000219712	4.58132e-08	protein_coding	WRKY family transcription factor
AT1G62420	8.14523	8.79887	7.01881	8.97357	7.80439	8.68767	7.63853	9.32215	0.0851999	0.0148465	protein_coding	Protein of unknown function (DUF506)
AT1G62570	11.0357	14.665	11.3826	15.8134	11.2521	14.181	11.0439	15.6493	6.01622e-06	0.00855848	protein_coding	flavin-monooxygenase glucosinolate S-oxygenase 4
AT1G62620	5.99492	7.0216	5.78973	6.19785	5.80955	6.66862	5.60396	6.30743	0.988614	1.37756e-07	protein_coding	Flavin-binding monooxygenase family protein
AT1G62710	9.80617	11.3391	10.5085	11.8164	10.317	11.7789	10.3943	11.7892	0.225659	5.89287e-10	protein_coding	beta vacuolar processing enzyme
AT1G62886	6.61497	7.43361	6.77364	7.52588	6.74226	7.66375	6.82901	7.77195	0.0298009	0.00157028	protein_coding	Nucleotide excision repair, TFIIH, subunit TTDA
AT1G63750	8.28655	9.95966	7.12526	9.03332	8.81576	10.5118	7.76524	9.86934	0.102102	3.33306e-07	protein_coding	Disease resistance protein (TIR-NBS-LRR class) family
AT1G64060	8.66928	9.79021	8.58886	9.70097	8.88969	9.96862	8.68987	9.80667	2.96524e-08	8.41466e-07	protein_coding	respiratory burst oxidase protein F
AT1G64065	6.79495	9.04454	7.06016	8.87198	6.93938	8.59525	7.01509	9.27522	3.12892e-05	0.00364194	protein_coding	Late embryogenesis abundant (LEA) hydroxyproline-rich glycoprotein family
AT1G64380	8.18395	10.1051	8.51214	10.2347	8.14892	10.389	8.89192	10.6792	1.29293e-05	0.000288845	protein_coding	Integrase-type DNA-binding superfamily protein
AT1G64390	13.8444	14.7197	13.9566	14.1732	13.6272	14.8706	13.9941	14.5603	0.00777712	9.73565e-09	protein_coding	glycosyl hydrolase 9C2
AT1G64590	6.24924	9.09831	5.91787	8.92897	6.2954	10.2699	6.07463	10.0623	0.410126	0.00211049	protein_coding	NAD(P)-binding Rossmann-fold superfamily protein
AT1G64660	10.562	12.6638	10.8017	13.2374	10.0307	12.3025	10.0921	12.6316	0.0512662	5.8952e-05	protein_coding	methionine gamma-lyase
AT1G64700	8.83701	9.59505	8.67684	9.24395	8.96691	9.77511	8.96222	9.56992	0.000214855	5.15697e-08	protein_coding
AT1G64720	9.28127	10.0904	9.46278	10.0703	9.57398	10.3509	9.45341	10.5434	0.000197874	1.04937e-09	protein_coding	Polyketide cyclase/dehydrase and lipid transport superfamily protein
AT1G65230	11.6775	12.2667	11.5009	12.1044	11.8628	12.2972	12.0713	12.5601	2.00283e-08	5.54171e-09	protein_coding	Uncharacterized conserved protein (DUF2358)
AT1G65240	6.20155	6.98918	5.75353	6.27592	5.87982	5.82808	5.38008	5.97103	0.0464622	1.2242e-06	protein_coding	Eukaryotic aspartyl protease family protein
AT1G65510	7.67679	10.1657	7.71463	9.72583	8.1441	10.7969	7.84855	10.1744	0.677882	9.53655e-11	protein_coding
AT1G65690	9.83336	10.7472	10.1089	11.5519	9.80951	10.8542	9.80656	11.1843	4.038e-06	0.00134527	protein_coding	Late embryogenesis abundant (LEA) hydroxyproline-rich glycoprotein family
AT1G65970	11.1227	11.7675	10.5863	11.1548	10.791	10.4862	10.2658	10.7955	2.17048e-10	0.0109631	protein_coding	thioredoxin-dependent peroxidase 2
AT1G66090	6.51517	10.7887	6.29834	9.77956	6.83248	10.8832	6.36919	10.3144	0.252249	0.00264465	protein_coding	Disease resistance protein (TIR-NBS class)
AT1G66160	9.10777	10.5577	8.94601	10.21	9.09356	10.3232	9.06588	10.4247	1.7232e-05	3.02313e-05	protein_coding	CYS, MET, PRO, and GLY protein 1
AT1G66400	9.61795	12.6057	9.79497	12.1489	10.0808	12.9739	10.1655	12.6554	0.274757	2.2168e-06	protein_coding	calmodulin like 23
AT1G66470	8.54964	9.69416	8.96593	9.30528	8.55107	9.62138	9.07964	9.43154	0.900209	3.29506e-09	protein_coding	ROOT HAIR DEFECTIVE6
AT1G66500	8.35777	11.8602	7.64568	10.9564	8.73582	11.725	7.96058	11.4634	1.0819e-11	0.03296	protein_coding	Pre-mRNA cleavage complex II
AT1G66700	5.03226	6.6435	4.98961	6.40378	4.98921	7.0365	5.14813	6.49839	3.95882e-05	0.000231826	protein_coding	S-adenosyl-L-methionine-dependent methyltransferases superfamily protein
AT1G66880	7.96683	9.79596	8.15714	9.27768	8.60657	10.2843	8.09652	9.35171	0.000623127	0.00121788	protein_coding	Protein kinase superfamily protein
AT1G67000	5.29512	6.89456	5.22952	6.26525	5.11542	7.13229	5.1613	6.53956	6.41019e-08	9.35018e-06	protein_coding	Protein kinase superfamily protein
AT1G67110	10.445	11.1773	11.1874	10.7288	10.2264	11.8811	10.9906	11.6364	0.0134474	6.76229e-05	protein_coding	cytochrome P450, family 735, subfamily A, polypeptide 2
AT1G67270	5.43568	5.34779	5.50965	6.0195	4.80502	5.70873	5.12843	5.62833	0.000207962	0.00136065	protein_coding	Zinc-finger domain of monoamine-oxidase A repressor R1 protein
AT1G67360	10.763	12.0484	11.1215	11.948	11.2173	12.4491	11.2154	11.9904	5.93303e-08	1.80942e-05	protein_coding	Rubber elongation factor protein (REF)
AT1G67365	8.76902	9.59982	9.17072	10.1122	9.25485	9.96381	9.50564	10.6678	0.00778527	1.56652e-06	other_rna	other RNA
AT1G67800	9.63507	10.6793	9.96152	10.2942	9.47169	10.884	9.54117	10.2885	6.1928e-06	4.59274e-06	protein_coding	Copine (Calcium-dependent phospholipid-binding protein) family
AT1G67855	4.9437	5.92378	4.8923	5.36118	5.00505	5.38871	4.75872	5.60137	0.270867	0.000278128	protein_coding
AT1G67856	5.94845	10.9243	6.15927	9.66783	6.24122	9.69278	6.1326	10.0489	0.926763	0.0162796	protein_coding	RING/U-box superfamily protein
AT1G68360	8.05782	11.0795	8.64706	10.177	8.00595	11.0491	8.93305	11.0587	4.15282e-05	1.64698e-08	protein_coding	C2H2 and C2HC zinc fingers superfamily protein
AT1G68450	6.4411	7.25939	6.47961	7.29414	6.2577	7.80003	6.54315	7.41512	0.0287013	1.27597e-05	protein_coding	VQ motif-containing protein
AT1G68500	9.99967	11.068	9.81279	11.9539	9.97789	10.8487	9.37262	12.1302	0.68061	0.047572	protein_coding
AT1G68530	10.544	11.0012	9.91627	11.314	10.5015	11.091	10.2716	11.5962	0.0465291	0.00604179	protein_coding	3-ketoacyl-CoA synthase 6
AT1G68690	9.62913	11.6709	9.68908	11.0779	9.43599	11.6899	9.39373	11.0215	2.5472e-08	8.11369e-11	protein_coding	Protein kinase superfamily protein
AT1G68765	5.28378	7.41766	5.51434	6.90409	5.3792	8.5409	5.30091	7.07009	1.15313e-06	3.05357e-10	protein_coding	Putative membrane lipoprotein
AT1G69252	12.1434	13.9767	12.4546	14.208	12.2034	13.8756	12.4638	14.4642	0.899806	2.27524e-07	other_rna
AT1G69270	9.97598	10.8295	10.5082	11.0161	10.1086	11.0507	10.5484	11.334	0.0407878	1.90956e-06	protein_coding	receptor-like protein kinase 1
AT1G69295	12.2264	12.8811	12.1862	13.025	12.2744	12.9363	12.4573	13.3064	1.26548e-06	1.63812e-08	protein_coding	plasmodesmata callose-binding protein 4
AT1G69530	12.852	14.0059	13.4005	13.3912	13.3024	14.0382	14.0349	13.6475	0.340371	0.0231442	protein_coding	expansin A1
AT1G69610	6.98963	7.58624	6.69439	7.85927	7.02848	7.73853	6.7817	8.12882	0.0587569	6.65777e-09	protein_coding	Protein of unknown function (DUF1666)
AT1G69790	7.06038	9.51091	7.93012	9.59452	7.15348	10.1844	7.59841	9.98509	8.223e-06	0.0014217	protein_coding	Protein kinase superfamily protein
AT1G69840	12.3246	13.4891	12.4084	13.8284	12.4831	13.1157	12.231	13.7263	0.645188	3.65617e-08	protein_coding	SPFH/Band 7/PHB domain-containing membrane-associated protein family
AT1G69870	13.0306	14.2261	12.1945	14.2785	13.1079	14.1672	12.7174	14.4788	0.0504938	0.00042956	protein_coding	nitrate transporter 1.7
AT1G69930	5.66777	7.664	5.40726	7.25448	5.67674	7.44474	5.66012	7.52853	3.72296e-10	1.51265e-10	protein_coding	glutathione S-transferase TAU 11
AT1G70130	5.2038	10.683	4.80246	9.22598	5.71614	10.1026	5.55488	9.10355	0.000109881	1.03841e-06	protein_coding	Concanavalin A-like lectin protein kinase family protein
AT1G70170	8.11605	10.2499	7.83557	9.89541	8.27082	10.3454	7.64059	9.72478	0.152463	4.10929e-07	protein_coding	matrix metalloproteinase
AT1G70750	9.56042	10.5019	9.27167	9.82494	9.42178	10.3958	9.16516	9.95047	0.0126423	0.00458666	protein_coding	Protein of unknown function, DUF593
AT1G70910	5.46334	5.99838	5.22458	5.71407	5.45692	6.18164	5.0468	6.25214	0.143562	0.0381792	protein_coding	RING/U-box superfamily protein
AT1G71140	8.05268	8.77468	7.80821	9.27765	8.09048	8.61114	7.58238	9.05997	9.39959e-05	8.87817e-09	protein_coding	MATE efflux family protein
AT1G71170	6.53993	7.56664	6.34766	7.03457	6.74473	7.70637	6.52961	7.46563	4.77585e-08	4.03534e-08	protein_coding	6-phosphogluconate dehydrogenase family protein
AT1G71330	7.03798	7.71513	7.04129	7.95276	7.22346	7.98761	7.32572	8.37511	0.00407352	0.00176987	protein_coding	non-intrinsic ABC protein 5
AT1G71450	4.79158	9.53344	4.71461	7.06431	4.89309	8.52096	4.87685	8.03536	0.162361	1.28635e-07	protein_coding	Integrase-type DNA-binding superfamily protein
AT1G71480	11.3299	11.8332	11.1684	11.7931	11.3861	11.9627	11.6279	12.2214	0.000194497	1.20205e-08	protein_coding	Nuclear transport factor 2 (NTF2) family protein
AT1G71520	5.30767	7.85489	5.39145	8.00114	5.31984	6.99741	5.5314	8.56655	0.841707	2.61567e-09	protein_coding	Integrase-type DNA-binding superfamily protein
AT1G71697	7.8421	8.46105	7.83137	8.52778	7.5876	8.2925	7.68646	8.8168	2.60053e-11	6.82387e-06	protein_coding	choline kinase 1
AT1G71960	8.71478	10.0127	8.93582	10.0711	9.05282	10.2177	8.97248	10.3654	0.210373	5.60768e-05	protein_coding	ATP-binding casette family G25
AT1G72240	9.06164	11.8191	8.46845	10.0558	8.93527	11.5649	8.71536	10.623	0.304358	0.00273616	protein_coding
AT1G72520	9.16956	13.4858	9.06879	13.7004	9.37456	12.9605	9.18023	13.7119	3.29941e-07	3.83189e-08	protein_coding	PLAT/LH2 domain-containing lipoxygenase family protein
AT1G72700	10.9583	11.7699	10.9614	11.8659	10.9864	11.7463	10.8589	11.6652	0.116826	6.4279e-06	protein_coding	ATPase E1-E2 type family protein / haloacid dehalogenase-like hydrolase family protein
AT1G72770	7.12578	9.55035	7.25126	9.98285	7.27856	9.90151	7.47467	10.4843	9.30319e-08	1.54389e-05	protein_coding	homology to ABI1
AT1G72790	9.68553	10.7542	9.93088	10.6998	9.80964	10.6187	9.97517	10.6298	9.56293e-06	0.00449768	protein_coding	hydroxyproline-rich glycoprotein family protein
AT1G72850	7.68222	8.23579	7.78735	8.31572	7.57372	8.54153	7.59748	8.7382	0.482347	0.0146823	protein_coding	Disease resistance protein (TIR-NBS class)
AT1G72920	7.61941	8.31991	7.59413	8.41357	7.9438	7.9263	7.56201	8.69803	9.85961e-10	7.36321e-06	protein_coding	Toll-Interleukin-Resistance (TIR) domain family protein
AT1G73010	9.09637	10.2963	8.83698	9.83218	9.26193	9.98822	8.08236	9.68795	0.554497	0.00702622	protein_coding	phosphate starvation-induced gene 2
AT1G73080	11.3082	12.6343	11.4266	12.8494	11.3603	12.5534	11.4824	12.8364	2.46993e-06	8.17283e-07	protein_coding	PEP1 receptor 1
AT1G73325	6.62992	7.94462	5.18806	7.5787	6.39784	7.20271	5.19613	6.78827	0.0994537	1.62418e-05	protein_coding	Kunitz family trypsin and protease inhibitor protein
AT1G73390	9.24782	11.4859	9.11718	11.9746	9.14203	11.5649	9.38674	12.536	0.0485033	2.00835e-05	protein_coding	Endosomal targeting BRO1-like domain-containing protein
AT1G73510	5.64233	7.77223	5.4438	7.03397	5.43997	7.41889	5.39078	6.99505	7.31036e-06	0.000112989	protein_coding
AT1G73810	7.82323	7.92709	7.26717	8.28283	8.16744	7.79899	7.21453	8.21002	4.52511e-09	2.46259e-05	protein_coding	Core-2/I-branching beta-1,6-N-acetylglucosaminyltransferase family protein
AT1G73965	7.82808	9.16543	8.04572	8.68622	7.79734	9.79927	7.60822	8.87644	4.47444e-06	2.49962e-09	protein_coding	CLAVATA3/ESR-RELATED 13
AT1G74080	7.44616	9.80815	7.96377	9.32706	7.7672	10.2529	7.86447	10.0108	0.00771114	0.000843241	protein_coding	myb domain protein 122
AT1G74360	6.98577	9.25445	7.04811	8.98453	7.04596	8.95	7.00223	9.09588	5.00583e-08	0.0135194	protein_coding	Leucine-rich repeat protein kinase family protein
AT1G74450	8.37556	9.8336	8.14756	9.78199	8.74382	9.59463	8.4241	10.0571	0.830271	9.62577e-07	protein_coding	Protein of unknown function (DUF793)
AT1G74930	5.43898	11.8881	6.4738	11.7695	5.18893	10.7927	5.96724	11.9494	1.12713e-09	2.98826e-06	protein_coding	Integrase-type DNA-binding superfamily protein
AT1G74950	10.7554	12.8923	10.8362	12.86	10.7965	12.3177	10.6307	12.5946	0.000111307	1.7267e-10	protein_coding	TIFY domain/Divergent CCT motif family protein
AT1G75170	9.98215	10.659	10.1031	11.1784	10.2042	10.7091	10.1315	11.1928	0.176245	4.13184e-06	protein_coding	Sec14p-like phosphatidylinositol transfer family protein
AT1G75880	8.04188	8.6884	6.77385	8.36825	8.20217	8.63342	7.57652	8.87361	0.33423	0.00929755	protein_coding	SGNH hydrolase-type esterase superfamily protein
AT1G76410	9.39268	11.0691	9.93118	10.7441	9.48831	11.2919	9.97058	11.525	9.9853e-06	0.000805965	protein_coding	RING/U-box superfamily protein
AT1G76440	10.9016	11.5313	10.8472	11.2661	10.6686	11.1225	10.5084	11.4076	3.21012e-08	8.11801e-05	protein_coding	HSP20-like chaperones superfamily protein
AT1G76600	8.96032	13.1076	9.60565	13.2347	9.30567	13.2734	9.32184	13.6546	7.27657e-07	5.15266e-09	protein_coding
AT1G76620	8.82561	9.55146	8.87566	9.88274	8.77038	9.51954	8.6523	9.87447	0.000421105	5.34329e-06	protein_coding	Protein of unknown function, DUF547
AT1G76640	7.27194	10.5737	7.58766	10.1175	7.46395	9.89946	7.23844	8.78763	0.62988	0.00652094	protein_coding	Calcium-binding EF-hand family protein
AT1G76970	7.17294	7.88605	7.35543	7.83756	7.30486	8.17485	7.33797	8.09703	8.59032e-08	0.0429083	protein_coding	Target of Myb protein 1
AT1G77280	9.20784	10.2685	9.47941	10.2418	9.07427	10.3649	9.25372	10.2551	1.56872e-08	5.4347e-05	protein_coding	Protein kinase protein with adenine nucleotide alpha hydrolases-like domain
AT1G77450	10.5038	13.265	11.1468	13.647	10.5171	13.3237	10.8751	14.4093	0.0273797	1.31357e-06	protein_coding	NAC domain containing protein 32
AT1G77500	7.94819	8.92763	7.98847	8.74165	7.98522	9.20122	8.02337	8.80926	1.51371e-06	0.00189763	protein_coding	Protein of unknown function (DUF630 and DUF632)
AT1G77640	7.66485	10.1965	7.21347	8.85212	7.49862	9.79228	7.46182	9.08419	3.97883e-08	3.8228e-05	protein_coding	Integrase-type DNA-binding superfamily protein
AT1G77890	8.00583	8.95069	7.99731	8.55962	8.19868	9.21487	8.05291	8.9396	0.315737	0.0271091	protein_coding	DNA-directed RNA polymerase II protein
AT1G78070	5.2126	8.02928	5.32454	7.67846	5.15342	8.10941	5.04717	7.89375	9.34382e-07	4.24242e-05	protein_coding	Transducin/WD40 repeat-like superfamily protein
AT1G78170	9.9794	10.7936	9.61254	10.9836	9.92286	10.7408	9.97028	11.382	5.0828e-14	7.1477e-13	protein_coding
AT1G78390	6.07212	8.67683	5.79305	7.60868	5.44439	8.33309	5.16798	7.87929	0.00122172	6.03833e-05	protein_coding	nine-cis-epoxycarotenoid dioxygenase 9
AT1G78410	6.20367	8.41899	6.29481	7.83959	6.70292	7.93889	6.34386	8.40806	0.0176797	1.86842e-06	protein_coding	VQ motif-containing protein
AT1G78995	10.4945	11.0089	10.1761	10.7652	9.9564	10.5516	10.151	10.9699	4.4836e-05	4.98976e-05	protein_coding
AT1G79160	11.2171	12.0048	11.1331	11.8954	11.2919	12.2487	11.4543	12.1096	2.38932e-05	3.69579e-09	protein_coding
AT1G79245	12.5064	13.3216	12.0401	13.6572	12.7859	13.0877	12.4107	13.5634	0.00884848	8.36669e-05	pseudogene
AT1G79310	8.43807	10.4535	8.69162	9.46249	8.41493	9.95429	8.32726	9.24794	0.000102758	0.000115329	protein_coding	metacaspase 7
AT1G80080	11.9653	12.5021	11.6673	11.919	11.5739	11.9359	11.2628	11.8106	0.0259999	1.00742e-08	protein_coding	Leucine-rich repeat (LRR) family protein
AT1G80120	9.34242	10.5492	9.28905	10.7019	9.42778	10.369	8.8989	10.6984	0.00127804	0.00106756	protein_coding	Protein of unknown function (DUF567)
AT1G80320	7.67841	8.6443	7.3172	8.02232	7.60103	8.63816	7.32912	8.12968	0.000589049	2.75532e-09	protein_coding	2-oxoglutarate (2OG) and Fe(II)-dependent oxygenase superfamily protein
AT1G80450	10.5404	11.1662	10.2955	10.827	9.9479	10.717	9.95944	10.7114	0.649894	0.000295107	protein_coding	VQ motif-containing protein
AT1G80610	8.97071	9.82869	9.19894	9.62016	8.82237	9.84222	9.0801	10.1635	0.000759412	0.00055235	protein_coding
AT1G80840	7.96461	11.4253	8.2491	11.4449	8.80135	11.3383	8.59883	11.4997	0.0587531	5.64022e-05	protein_coding	WRKY DNA-binding protein 40
AT2G01110	6.33407	7.23854	5.98467	6.76663	6.33567	6.96847	6.06866	7.06923	0.0068455	2.18386e-05	protein_coding	Sec-independent periplasmic protein translocase
AT2G01150	8.84035	10.3908	8.8072	9.60331	9.08133	10.3747	8.71327	9.45684	0.000586771	7.1654e-08	protein_coding	RING-H2 finger protein 2B
AT2G01300	6.79522	8.49186	7.34293	7.87834	6.63942	8.21974	7.43593	8.20806	8.71386e-09	0.00107029	protein_coding
AT2G03090	11.99	13.2182	12.5726	12.7616	11.8804	13.2356	11.9776	12.7798	0.00227879	7.04965e-08	protein_coding	expansin A15
AT2G04260	5.7242	6.32441	5.70351	6.90678	6.46413	7.25589	6.0417	7.13079	0.170314	1.41993e-08	pseudogene
AT2G04515	5.54595	7.98979	5.83987	7.04024	5.46176	8.27512	5.4787	7.3138	1.51317e-06	1.77833e-06	protein_coding
AT2G13640	4.79995	5.70931	4.82518	5.89208	4.74932	5.86973	5.24348	5.66392	8.50909e-08	6.5194e-09	protein_coding	Transcription factor IIS family protein
AT2G13665	9.46995	10.0853	9.6509	10.2566	9.77794	10.2901	9.91729	10.6747	0.167832	2.10582e-08	other_rna	other RNA
AT2G13790	6.38438	8.0023	6.36973	7.6025	6.35937	8.25712	6.44035	7.92613	0.0376572	2.23979e-05	protein_coding	somatic embryogenesis receptor-like kinase 4
AT2G15340	5.14984	5.52752	5.45902	6.31092	5.00549	6.16462	5.10288	5.64659	0.958303	3.87156e-09	protein_coding	glycine-rich protein
AT2G16630	11.4347	11.5336	10.7644	11.892	11.3016	11.5528	10.9079	11.625	0.307623	4.07794e-07	protein_coding	Pollen Ole e 1 allergen and extensin family protein
AT2G16700	12.0041	12.6385	12.1375	12.9036	12.2574	12.7974	12.1673	13.021	2.93883e-07	9.28552e-07	protein_coding	actin depolymerizing factor 5
AT2G17010	5.46004	5.90569	5.24812	5.85959	5.38526	6.04942	5.01548	5.572	0.0937093	3.43641e-10	protein_coding	Mechanosensitive ion channel family protein
AT2G17040	7.28965	10.3991	7.70241	10.1877	9.35988	10.726	8.58997	11.1191	7.3039e-08	9.68947e-09	protein_coding	NAC domain containing protein 36
AT2G17660	6.94339	10.1902	7.2521	10.0855	7.09611	9.89569	7.16063	9.75579	0.7646	2.624e-05	protein_coding	RPM1-interacting protein 4 (RIN4) family protein
AT2G17680	5.0534	8.0351	4.84662	6.39014	5.13805	7.44876	4.98074	7.04446	1.14426e-05	3.95364e-07	protein_coding	Arabidopsis protein of unknown function (DUF241)
AT2G17840	5.9587	8.5146	5.84145	8.39393	5.99782	7.97011	5.74412	8.56566	0.208618	3.76175e-06	protein_coding	Senescence/dehydration-associated protein-related
AT2G18193	10.8402	12.9795	10.579	12.4609	10.7019	12.938	10.4581	12.7772	0.000120595	1.31574e-07	protein_coding	P-loop containing nucleoside triphosphate hydrolases superfamily protein
AT2G18196	6.89495	8.06568	6.9933	7.91478	7.04334	8.51641	7.04308	8.39371	0.623012	0.0346407	protein_coding	Heavy metal transport/detoxification superfamily protein
AT2G18200	6.15255	8.48712	6.32079	7.60478	6.3135	8.87279	6.1273	7.74099	8.52426e-05	0.000725726	protein_coding
AT2G18210	6.1164	8.37783	6.12502	7.33396	6.23491	8.59161	5.81791	7.49444	0.000117999	2.59771e-05	protein_coding
AT2G18230	11.9415	12.6721	12.2152	12.9589	12.0171	12.5633	11.912	12.7058	1.79979e-06	0.00213889	protein_coding	pyrophosphorylase 2
AT2G18680	6.24492	8.68946	6.2293	7.9518	6.24229	8.93054	6.09055	8.64239	6.64347e-11	2.15744e-05	protein_coding
AT2G19190	6.88134	9.25276	7.55159	9.23754	6.66937	9.35	7.2729	9.18184	0.0234516	0.00232151	protein_coding	FLG22-induced receptor-like kinase 1
AT2G20625	4.95201	6.57814	4.83671	5.87911	5.09341	6.50716	4.73089	6.08124	4.94138e-05	2.99325e-13	protein_coding	Protein of unknown function (DUF626)
AT2G21120	11.5813	12.4625	11.367	11.9735	11.6943	12.3999	11.4378	12.0981	8.94109e-09	0.0211741	protein_coding	Protein of unknown function (DUF803)
AT2G22121	4.71124	8.96042	5.15108	7.62929	4.71473	9.06337	4.77355	7.8557	0.0118882	0.027378	protein_coding	low-molecular-weight cysteine-rich 35
AT2G22850	8.36402	9.91955	8.64287	9.52735	8.21804	9.70162	8.6077	9.8176	1.45918e-07	0.0285488	protein_coding	basic leucine-zipper 6
AT2G22880	8.49959	12.0278	9.21549	12.2492	8.87141	11.17	9.17041	12.2596	0.00475703	0.000194617	protein_coding	VQ motif-containing protein
AT2G23270	4.83232	9.96617	5.08334	8.64107	5.01122	10.6827	4.86913	9.00483	7.1493e-05	0.00704926	protein_coding
AT2G23320	12.2785	13.2108	12.4652	13.1459	12.2529	13.2296	12.438	13.366	0.000126077	0.0495008	protein_coding	WRKY DNA-binding protein 15
AT2G23340	10.7575	12.1893	10.937	11.8256	10.6901	12.5624	10.8996	11.9344	0.00775255	5.95577e-05	protein_coding	DREB and EAR motif protein 3
AT2G23450	11.0199	11.6908	11.1801	12.0905	11.1347	11.7766	11.0043	12.0359	0.171698	1.79185e-06	protein_coding	Protein kinase superfamily protein
AT2G24130	4.85858	6.33273	4.7625	5.45521	5.12219	6.16366	4.76008	5.40739	2.32906e-10	0.0107098	protein_coding	Leucine-rich receptor-like protein kinase family protein
AT2G24285	4.62245	6.06481	4.88926	5.56648	4.8636	5.97454	4.90135	6.02691	0.0126008	2.90219e-05	protein_coding
AT2G24570	12.1142	12.6939	12.5589	12.7757	12.0566	13.1253	12.1031	12.6039	6.33316e-08	5.71474e-09	protein_coding	WRKY DNA-binding protein 17
AT2G24600	6.68364	9.16766	6.28373	8.79072	6.81327	9.22812	6.18215	9.03014	0.168126	0.0114703	protein_coding	Ankyrin repeat family protein
AT2G25200	6.71931	8.08542	7.11091	8.625	6.43657	8.32568	7.61802	8.90433	0.0660734	4.76402e-05	protein_coding	Plant protein of unknown function (DUF868)
AT2G25460	6.53376	11.5033	6.96191	10.945	6.61034	11.4932	6.79149	11.0865	0.863594	2.30146e-10	protein_coding
AT2G25530	8.47647	8.80037	8.22715	8.54686	8.34184	8.91758	7.82495	8.69963	1.74873e-05	0.000319286	protein_coding	AFG1-like ATPase family protein
AT2G25625	10.3491	11.6735	9.55023	11.6134	10.6977	12.1478	10.0627	12.173	0.366593	0.00641873	protein_coding
AT2G25690	9.07386	11.031	9.22736	10.6852	9.30822	11.1004	9.28745	10.9301	3.3308e-05	1.7574e-07	protein_coding	Protein of unknown function (DUF581)
AT2G25735	7.43476	9.27765	7.57334	8.67244	8.10679	8.9551	7.6213	9.15179	3.49151e-07	2.97559e-10	protein_coding
AT2G26150	7.16877	9.39608	7.94259	8.96311	7.31897	9.66063	7.2468	8.81771	0.178812	1.44529e-07	protein_coding	heat shock transcription factor A2
AT2G26380	5.47791	9.52565	5.71797	8.59425	5.94843	9.62651	5.66003	8.75514	0.000407931	1.0713e-06	protein_coding	Leucine-rich repeat (LRR) family protein
AT2G26480	6.91919	9.75483	7.56439	8.91618	7.30445	11.2318	7.6406	10.0411	0.0249766	0.00474929	protein_coding	UDP-glucosyl transferase 76D1
AT2G26530	6.64084	10.5982	7.48639	10.4265	6.89406	10.4396	7.62098	10.6789	1.06509e-10	0.00165139	protein_coding	Protein of unknown function (DUF1645)
AT2G27010	8.91289	9.73215	9.32749	9.59684	8.8048	9.90554	8.8899	9.59151	0.000954491	0.00613466	protein_coding	cytochrome P450, family 705, subfamily A, polypeptide 9
AT2G27080	8.26776	10.7942	8.73127	10.7101	8.46735	10.7386	8.92177	10.973	0.000174036	0.000198513	protein_coding	Late embryogenesis abundant (LEA) hydroxyproline-rich glycoprotein family
AT2G27280	5.05191	5.97728	4.89698	5.75619	4.97058	6.1384	4.77871	5.89666	1.71914e-06	9.77374e-05	protein_coding	Coiled-coil domain-containing protein 55 (DUF2040)
AT2G28210	5.97838	9.01949	5.48643	7.81502	6.37685	9.28184	5.91681	8.45827	4.97457e-08	3.5259e-07	protein_coding	alpha carbonic anhydrase 2
AT2G29380	4.91497	9.28998	5.2358	7.91572	5.07251	8.30864	5.04425	7.41295	0.0650045	8.21426e-09	protein_coding	highly ABA-induced PP2C gene 3
AT2G29440	10.3772	11.9745	10.7402	11.9687	10.6152	11.712	10.86	11.7865	5.69683e-05	0.0250301	protein_coding	glutathione S-transferase tau 6
AT2G29450	13.2219	14.6388	13.1854	14.959	13.0338	14.4878	13.1691	15.1446	5.96489e-09	1.09843e-05	protein_coding	glutathione S-transferase tau 5
AT2G29460	7.86431	10.4941	7.84882	11.015	8.22149	9.9938	7.90548	11.0865	0.000159252	0.00456548	protein_coding	glutathione S-transferase tau 4
AT2G29480	6.12549	8.65593	6.39325	8.07728	6.10877	9.75471	6.39678	9.08658	2.66322e-05	8.16368e-09	protein_coding	glutathione S-transferase tau 2
AT2G30020	10.5039	11.5401	10.6468	11.5574	10.5986	11.1792	10.6626	11.6372	0.00530318	0.01455	protein_coding	Protein phosphatase 2C family protein
AT2G30130	8.59983	9.71833	8.79938	9.6044	8.49108	9.89483	8.58123	9.83125	0.317108	0.0424859	protein_coding	Lateral organ boundaries (LOB) domain family protein
AT2G30250	8.9248	11.7116	8.86233	11.102	9.23798	12.4648	9.09963	11.7166	5.78831e-06	4.15924e-05	protein_coding	WRKY DNA-binding protein 25
AT2G30400	6.52837	7.2887	6.55416	7.71478	6.33941	7.09159	6.28243	7.30136	0.317161	1.0507e-07	protein_coding	ovate family protein 2
AT2G30440	8.17104	8.96733	8.18461	8.83087	8.21983	9.23369	8.23879	9.05018	0.0522504	0.000145812	protein_coding	thylakoid processing peptide
AT2G30550	9.04151	10.5289	9.28584	10.645	9.34514	10.5135	8.9095	10.4246	0.864425	3.77303e-07	protein_coding	alpha/beta-Hydrolases superfamily protein
AT2G30766	8.4771	9.27361	5.476	7.85866	8.09989	8.69191	5.99085	8.2145	0.000387367	8.04723e-07	protein_coding
AT2G30790	8.98254	10.1952	8.95346	10.2673	9.34314	10.5373	9.23099	10.7037	1.4513e-06	5.32408e-08	protein_coding	photosystem II subunit P-2
AT2G31180	8.53883	9.08406	8.58912	9.67877	8.45429	9.29669	8.41268	9.32469	4.48317e-06	3.24719e-05	protein_coding	myb domain protein 14
AT2G31210	5.0152	6.87751	5.18238	6.52616	5.06541	6.67029	5.21255	6.74451	0.00296604	5.74766e-05	protein_coding	basic helix-loop-helix (bHLH) DNA-binding superfamily protein
AT2G31345	4.98747	7.96981	5.25154	7.09756	5.26194	7.89838	5.10358	7.52464	3.25271e-09	3.40472e-09	protein_coding
AT2G31690	4.72391	6.92243	4.77407	6.46096	4.68116	6.90022	4.7869	5.73496	0.00161297	6.6348e-09	protein_coding	alpha/beta-Hydrolases superfamily protein
AT2G31865	5.59339	7.1611	5.54802	6.92357	5.63817	7.48508	5.44259	7.22443	0.679902	4.86822e-06	protein_coding	poly(ADP-ribose) glycohydrolase 2
AT2G31880	11.046	12.3056	11.2268	12.1735	11.1717	12.1498	11.135	12.3577	0.482682	0.000408513	protein_coding	Leucine-rich repeat protein kinase family protein
AT2G31955	10.0108	10.4392	9.79458	10.5775	10.0363	10.5153	10.0341	10.8175	1.02985e-08	0.00426601	protein_coding	cofactor of nitrate reductase and xanthine dehydrogenase 2
AT2G32030	9.30594	11.8321	9.93347	12.083	9.6043	12.0164	9.85576	12.2576	0.347418	0.00511296	protein_coding	Acyl-CoA N-acyltransferases (NAT) superfamily protein
AT2G32050	5.49068	6.08011	5.41981	5.98291	5.55858	6.03136	5.67373	6.56602	6.16687e-06	0.000281599	protein_coding	Family of unknown function (DUF572)
AT2G32140	6.06036	10.0542	5.79013	9.79149	6.48276	9.4023	6.03097	9.91851	0.00174263	0.00528103	protein_coding	transmembrane receptors
AT2G32190	10.3022	13.0326	10.0726	12.3227	10.643	12.9526	10.2116	12.8552	1.9112e-08	0.0343664	protein_coding
AT2G32200	6.02965	9.59426	5.71723	9.14867	6.12801	8.93495	6.09376	9.51662	5.36898e-09	2.35356e-05	protein_coding
AT2G32510	7.51243	9.15164	7.45598	9.26565	7.68247	9.00919	7.31847	9.4866	8.49252e-07	2.41479e-09	protein_coding	mitogen-activated protein kinase kinase kinase 17
AT2G32530	10.3394	11.2956	10.2	10.8248	10.1325	11.3309	9.98497	10.6068	0.0575088	0.0123619	protein_coding	cellulose synthase-like B3
AT2G32930	7.53112	8.84098	8.00091	9.19089	7.55085	9.04594	8.11691	9.37738	0.0621352	0.00688349	protein_coding	zinc finger nuclease 2
AT2G33280	5.08269	5.54831	4.93444	5.29822	4.97474	5.78441	4.99839	6.0879	6.30873e-05	1.26067e-05	protein_coding	Major facilitator superfamily protein
AT2G33380	8.80431	13.5242	7.09488	14.5532	8.93746	13.5362	7.78756	14.8887	2.04944e-05	6.73194e-11	protein_coding	Caleosin-related family protein
AT2G33580	8.1641	10.0237	7.94901	9.91562	8.27024	10.0443	7.94179	10.1732	7.82447e-05	0.00017456	protein_coding	Protein kinase superfamily protein
AT2G34500	8.29144	9.5296	8.74391	10.3717	8.54579	9.25425	8.30163	9.70728	0.645259	1.74094e-08	protein_coding	cytochrome P450, family 710, subfamily A, polypeptide 1
AT2G34600	5.12791	9.20179	5.43526	10.2927	5.33108	8.66181	5.3633	9.75093	5.97796e-10	6.73099e-10	protein_coding	jasmonate-zim-domain protein 7
AT2G34610	6.75944	11.0065	6.2404	9.76356	8.02657	11.4167	6.628	9.63188	5.22581e-05	0.0112361	protein_coding
AT2G34650	9.68074	10.6001	10.1484	10.5249	9.8309	10.9429	10.6079	10.9426	0.00308849	6.27038e-09	protein_coding	Protein kinase superfamily protein
AT2G34850	6.55443	8.67568	6.72505	8.51959	6.45373	8.27597	6.50276	8.34976	1.41174e-05	4.87737e-05	protein_coding	NAD(P)-binding Rossmann-fold superfamily protein
AT2G35070	4.86575	5.80909	4.68006	5.43594	4.81763	5.25579	4.88041	5.72614	3.4521e-05	2.42324e-07	protein_coding
AT2G35710	7.01993	8.70728	7.0274	8.03603	7.06087	8.77091	6.92926	8.0569	0.212443	0.0013315	protein_coding	Nucleotide-diphospho-sugar transferases superfamily protein
AT2G35760	9.69415	10.5397	8.94058	11.1363	9.74685	10.3701	9.34783	11.4443	0.000273315	4.12224e-05	protein_coding	Uncharacterised protein family (UPF0497)
AT2G35940	10.5244	11.6257	10.6187	12.1152	10.8089	12.1151	11.1165	12.4186	0.0239335	0.000180557	protein_coding	BEL1-like homeodomain 1
AT2G35950	5.83116	8.38186	6.07873	9.15121	5.8518	8.46963	6.03581	9.66312	0.0299825	0.015565	protein_coding	embryo sac development arrest 12
AT2G35980	7.21123	10.9348	8.32052	10.9817	7.424	11.4046	7.6183	11.4666	6.45195e-11	3.07712e-05	protein_coding	Late embryogenesis abundant (LEA) hydroxyproline-rich glycoprotein family
AT2G36220	10.4048	12.5644	11.3403	12.3867	10.5474	12.6423	11.5867	12.6009	1.59883e-06	2.2811e-11	protein_coding
AT2G36320	6.04333	7.27335	6.60982	7.48525	6.12292	7.28351	6.81779	7.94818	0.076738	2.30707e-07	protein_coding	A20/AN1-like zinc finger family protein
AT2G36650	9.18169	11.068	8.57932	10.2575	9.2161	10.5961	8.39222	10.0907	6.28929e-07	1.53514e-05	protein_coding
AT2G37170	14.1938	15.186	14.321	15.0222	14.2868	14.9656	13.963	14.9076	0.0344016	1.29384e-10	protein_coding	plasma membrane intrinsic protein 2
AT2G37180	11.9235	14.2038	12.4045	14.5453	11.9259	14.1755	12.2698	14.5885	0.337721	0.000323171	protein_coding	Aquaporin-like superfamily protein
AT2G37430	5.55394	8.18313	5.73305	7.11108	5.35525	8.72455	5.49	7.25942	0.849303	4.48098e-05	protein_coding	C2H2 and C2HC zinc fingers superfamily protein
AT2G37770	8.3153	10.4078	8.80906	11.8671	9.48461	11.2279	8.75825	12.1096	0.00550538	0.00925723	protein_coding	NAD(P)-linked oxidoreductase superfamily protein
AT2G37870	9.81533	11.5523	7.86046	10.7917	8.92644	10.2856	6.7783	10.5185	1.9723e-07	8.15998e-07	protein_coding	Bifunctional inhibitor/lipid-transfer protein/seed storage 2S albumin superfamily protein
AT2G37880	6.28869	7.10964	6.18283	6.80811	6.172	7.04229	6.03903	6.80036	0.000915034	0.00617507	protein_coding	Protein of unknown function, DUF617
AT2G38010	11.3285	11.8644	11.3184	11.9859	10.9192	11.2233	10.8221	11.5755	0.210254	2.85596e-20	protein_coding	Neutral/alkaline non-lysosomal ceramidase
AT2G38240	4.99921	9.2542	5.25085	10.621	4.88436	8.44048	5.16343	10.1546	1.43689e-09	2.21246e-07	protein_coding	2-oxoglutarate (2OG) and Fe(II)-dependent oxygenase superfamily protein
AT2G38340	6.02792	6.85581	6.19756	7.0121	6.42081	6.50514	6.14058	7.17509	0.00122848	0.000823553	protein_coding	Integrase-type DNA-binding superfamily protein
AT2G38790	6.20945	9.02089	6.36966	8.88386	6.19777	9.2256	6.21256	8.53521	1.17464e-08	6.38117e-05	protein_coding
AT2G38820	10.0269	11.2978	10.1697	11.3787	10.1338	11.4044	10.2762	12.0551	1.65699e-05	1.01319e-09	protein_coding	Protein of unknown function (DUF506)
AT2G38823	7.25945	11.2971	7.29012	10.245	7.23277	12.588	7.2938	11.6249	0.00066285	1.17532e-06	protein_coding
AT2G38830	5.35226	7.11199	5.20589	6.66308	5.46923	8.08217	5.25106	7.30951	8.21799e-05	1.39325e-05	protein_coding	Ubiquitin-conjugating enzyme/RWD-like protein
AT2G39110	8.11274	10.4052	8.18666	9.28179	8.29102	10.3798	8.08395	8.98304	0.0978654	0.0238579	protein_coding	Protein kinase superfamily protein
AT2G39200	9.21322	11.8154	9.74939	11.8049	9.35775	11.7996	9.66703	12.1252	0.29669	1.53186e-07	protein_coding	Seven transmembrane MLO family protein
AT2G39350	9.58578	11.0921	9.23102	11.6124	9.69507	11.491	9.42673	11.9353	1.70587e-05	5.77309e-08	protein_coding	ABC-2 type transporter family protein
AT2G39450	11.8243	12.4986	11.8153	12.6164	11.6009	12.211	11.6494	12.9634	1.17983e-06	3.50343e-10	protein_coding	Cation efflux family protein
AT2G39650	10.6483	12.6385	10.2827	11.5265	10.6414	12.6709	10.0359	11.734	0.000190163	6.77487e-09	protein_coding	Protein of unknown function (DUF506)
AT2G39800	7.84471	9.9764	7.82056	10.4215	7.65774	10.0041	7.66109	10.7303	0.101592	6.3151e-06	protein_coding	delta1-pyrroline-5-carboxylate synthase 1
AT2G40080	10.2982	10.9735	10.5345	11.4513	10.4207	10.9859	10.1407	11.3418	7.19202e-09	0.0292974	protein_coding	Protein of unknown function (DUF1313)
AT2G40095	6.67174	7.4036	7.12442	7.33036	6.78455	7.6695	6.79524	7.67854	0.841615	0.00029314	protein_coding	Alpha/beta hydrolase related protein
AT2G40170	4.95846	7.82475	5.8719	8.5424	5.31647	7.74794	5.90328	7.94933	0.000100314	0.000258845	protein_coding	Stress induced protein
AT2G40460	8.42404	9.00607	8.02882	9.49816	8.72392	9.05551	8.45209	9.58907	0.00645698	3.67233e-06	protein_coding	Major facilitator superfamily protein
AT2G41100	12.6108	14.6836	11.6579	14.4495	12.7787	14.5333	11.5241	14.6273	9.998e-14	1.3741e-08	protein_coding	Calcium-binding EF hand family protein
AT2G41150	6.54069	7.66201	6.68201	7.41731	6.73776	8.2523	6.66646	7.65993	2.30789e-06	9.76898e-05	protein_coding
AT2G41170	9.3517	10.162	8.6451	9.78356	9.60343	9.92322	9.44472	10.0211	0.00116884	0.0238192	protein_coding	F-box family protein
AT2G41210	9.31755	9.80743	8.82237	9.59153	9.57947	9.89136	9.09251	9.8398	0.656606	2.61656e-10	protein_coding	phosphatidylinositol- 4-phosphate 5-kinase 5
AT2G41330	9.38432	9.57548	8.69787	9.41638	9.43164	9.7087	8.94931	9.54633	7.66006e-05	0.0118646	protein_coding	Glutaredoxin family protein
AT2G41640	8.15044	11.1427	8.63123	11.0853	8.52294	10.9025	9.04862	11.3843	8.27662e-07	8.20915e-05	protein_coding	Glycosyltransferase family 61 protein
AT2G41660	7.18771	7.59613	6.87716	7.63264	6.6933	7.24021	6.53407	7.29263	0.000573621	0.00016705	protein_coding	Protein of unknown function, DUF617
AT2G41730	8.41568	12.336	8.70399	11.6465	8.51973	13.0606	8.68368	12.212	1.08351e-05	3.60695e-07	protein_coding
AT2G41870	9.8623	12.2294	10.2414	12.6499	10.1432	12.4831	10.5849	13.322	6.18506e-12	0.00018472	protein_coding	Remorin family protein
AT2G42430	6.96664	8.44831	7.52541	7.96474	7.18288	9.06429	7.12418	8.21586	0.0330058	0.000315496	protein_coding	lateral organ boundaries-domain 16
AT2G42530	7.08167	9.73338	6.69063	11.9093	6.31546	8.68826	6.13446	12.108	6.36858e-11	1.03408e-05	protein_coding	cold regulated 15b
AT2G42540	7.31437	10.2598	7.26342	12.3412	7.37889	9.8253	7.04093	12.3181	0.0182147	0.000323599	protein_coding	cold-regulated 15a
AT2G42760	5.30906	6.99734	5.61291	6.25606	5.63287	6.51579	5.20168	6.75579	0.0013044	0.00108915	protein_coding
AT2G43000	6.36831	7.74552	6.91143	7.67915	6.5395	8.21718	6.74697	7.53746	6.77244e-05	0.000125865	protein_coding	NAC domain containing protein 42
AT2G43018	10.8984	11.9389	11.1383	12.2481	11.3687	12.366	11.3897	12.3159	0.0111003	6.14772e-09	protein_coding	conserved peptide upstream open reading frame 17
AT2G43020	10.8867	11.9068	11.0957	12.367	11.4606	12.462	11.4298	12.4485	5.48286e-09	1.00519e-07	protein_coding	polyamine oxidase 2
AT2G43570	9.51183	10.8246	9.6884	11.1643	9.75687	11.03	9.31308	11.0549	0.000290807	1.76321e-08	protein_coding	chitinase, putative
AT2G43870	8.73826	8.92899	8.08247	9.15054	8.69353	9.0768	8.59097	9.18037	8.6731e-07	0.000149522	protein_coding	Pectin lyase-like superfamily protein
AT2G44200	5.34681	6.7637	5.13155	6.61723	5.5983	7.0239	5.33958	7.06612	0.636113	0.00117542	protein_coding	CBF1-interacting co-repressor CIR, N-terminal;Pre-mRNA splicing factor
AT2G44460	5.36543	6.43194	5.39015	6.78108	5.11849	6.16547	5.11966	5.99868	0.511182	0.0318714	protein_coding	beta glucosidase 28
AT2G44578	6.25551	9.99755	6.21363	9.75681	6.45993	10.0475	6.59692	9.63525	2.62063e-05	3.34143e-09	protein_coding	RING/U-box superfamily protein
AT2G44581	5.70949	8.25245	5.62256	7.90668	5.52815	8.14002	5.59268	7.86227	1.29615e-05	6.65113e-10	protein_coding	RING/U-box superfamily protein
AT2G44840	7.48213	12.4276	7.86079	12.2628	7.628	12.4089	7.73705	12.3451	7.24054e-06	3.18934e-06	protein_coding	ethylene-responsive element binding factor 13
AT2G45600	8.33803	9.71601	8.44674	9.22765	8.04383	9.25333	8.09727	9.41783	2.58944e-07	3.92852e-06	protein_coding	alpha/beta-Hydrolases superfamily protein
AT2G45760	6.75006	11.455	6.21756	10.4238	7.49748	10.8854	6.26912	9.93342	0.00124826	4.03354e-11	protein_coding	BON association protein 2
AT2G45900	9.45435	9.98473	8.89734	9.62389	8.55969	9.83307	8.42008	9.34111	0.166128	2.76763e-07	protein_coding	Phosphatidylinositol N-acetyglucosaminlytransferase subunit P-related
AT2G46270	7.40548	10.8351	7.79721	10.8196	7.56157	10.5022	7.4782	11.1182	0.756348	3.6447e-05	protein_coding	G-box binding factor 3
AT2G46400	7.18119	12.8799	7.60641	11.9369	7.92594	12.7634	7.66097	12.3009	0.0040014	5.37933e-08	protein_coding	WRKY DNA-binding protein 46
AT2G46670	10.1329	11.4203	9.84192	11.4927	10.2306	11.6596	10.6128	12.0082	0.13698	2.57401e-06	protein_coding	CCT motif family protein
AT2G46735	10.1527	11.1144	10.1883	10.7951	10.1264	10.9935	10.4237	11.2067	0.718541	3.7529e-05	protein_coding
AT2G46790	7.79072	8.73685	7.45974	8.72621	7.86097	8.9118	8.084	9.29646	0.00113513	2.60957e-05	protein_coding	pseudo-response regulator 9
AT2G46940	8.43198	10.1825	8.4962	9.2217	8.48992	10.3247	8.21966	9.53667	0.11334	8.13604e-06	protein_coding
AT2G47000	12.3047	13.2234	12.7006	13.0894	12.1627	13.4405	12.3591	13.2829	0.0226531	0.0464631	protein_coding	ATP binding cassette subfamily B4
AT2G47050	6.30523	6.4563	6.40509	6.27798	5.44378	6.13419	6.08217	6.41442	0.243362	2.7213e-06	protein_coding	Plant invertase/pectin methylesterase inhibitor superfamily protein
AT2G47190	4.88686	7.30788	5.12575	7.36318	5.23148	7.4259	5.12708	7.48648	1.44308e-07	1.34918e-05	protein_coding	myb domain protein 2
AT2G47260	8.70189	9.89825	8.99033	10.168	8.99081	10.4418	8.92858	10.595	0.00026203	1.53024e-06	protein_coding	WRKY DNA-binding protein 23
AT2G47810	5.68123	6.48786	5.88115	6.57233	5.52963	5.58914	5.95192	5.95086	0.901491	1.18611e-08	protein_coding	nuclear factor Y, subunit B5
AT3G01175	5.10938	6.16797	5.14266	6.19993	5.08495	6.51832	5.11159	6.60434	0.225249	0.000829623	protein_coding	Protein of unknown function (DUF1666)
AT3G01830	5.9849	11.1116	5.82281	10.4557	5.9577	10.5611	5.65342	10.1524	1.15941e-08	5.85089e-13	protein_coding	Calcium-binding EF-hand family protein
AT3G02070	5.62647	6.14926	5.52707	5.94631	5.49309	6.62591	5.5157	6.44187	0.000587708	3.62189e-08	protein_coding	Cysteine proteinases superfamily protein
AT3G02140	8.35791	9.54348	8.57346	9.43641	8.60359	9.30618	8.51681	10.0426	0.00112965	0.0436579	protein_coding	AFP2 (ABI five-binding protein 2) family protein
AT3G02493	6.70285	8.32501	6.95932	7.41219	7.08874	9.48947	7.21775	8.81231	0.0630463	0.00326005	protein_coding	ROTUNDIFOLIA like 19
AT3G02800	8.03491	10.65	8.88762	10.306	8.0788	10.6107	8.6849	10.8324	0.395719	1.77573e-06	protein_coding	Tyrosine phosphatase family protein
AT3G02840	5.5739	9.91083	5.90053	8.95978	5.86567	9.60181	5.57029	9.17806	4.87173e-05	3.75007e-07	protein_coding	ARM repeat superfamily protein
AT3G02990	6.52066	7.49084	6.66466	7.5084	6.41442	7.1067	6.42799	7.54637	0.127519	2.30153e-05	protein_coding	heat shock transcription factor A1E
AT3G03230	5.56897	6.33596	5.75425	6.26173	5.29737	5.9606	5.66996	5.79195	0.000466571	0.00837513	protein_coding	alpha/beta-Hydrolases superfamily protein
AT3G03280	6.02202	8.27697	6.65386	7.75084	6.12527	8.90735	6.39313	8.00306	2.31488e-06	0.00033688	protein_coding
AT3G03310	9.94775	10.7156	10.0579	10.8769	9.88358	10.4881	9.83882	10.6026	4.32369e-10	0.0450066	protein_coding	lecithin:cholesterol acyltransferase 3
AT3G03341	4.91236	7.04155	5.30459	6.91531	5.48223	6.79094	5.2257	7.21594	0.106173	3.49796e-06	protein_coding
AT3G03770	12.6029	13.4617	12.6881	13.3564	12.2264	13.173	12.3522	12.9366	5.04908e-06	6.42551e-07	protein_coding	Leucine-rich repeat protein kinase family protein
AT3G03910	5.47211	6.30333	5.58077	6.90033	5.775	7.25801	5.62289	6.9604	6.23021e-07	5.1495e-05	protein_coding	glutamate dehydrogenase 3
AT3G04120	6.6395	7.70102	6.60949	7.41681	6.60074	7.95407	6.63083	7.58314	8.81754e-07	0.0016349	protein_coding	glyceraldehyde-3-phosphate dehydrogenase C subunit 1
AT3G04240	12.3581	13.4487	12.4632	13.7273	12.5295	13.5549	12.5743	14.0011	1.42296e-05	6.29544e-06	protein_coding	Tetratricopeptide repeat (TPR)-like superfamily protein
AT3G04790	7.28112	8.00265	6.80056	7.69911	7.30742	8.28279	6.90927	8.13797	0.000310312	0.00224712	protein_coding	Ribose 5-phosphate isomerase, type A protein
AT3G08040	10.6203	11.2287	10.4468	11.126	10.2159	11.1508	10.2155	11.2312	0.142614	2.96596e-07	protein_coding	MATE efflux family protein
AT3G08720	9.77018	11.6272	10.0302	11.7001	10.1792	11.6578	9.98271	11.8681	0.0183786	1.08913e-06	protein_coding	serine/threonine protein kinase 2
AT3G08860	9.66335	11.1657	9.52814	11.2338	10.0078	10.8354	9.24113	11.2632	0.461381	0.000284262	protein_coding	PYRIMIDINE 4
AT3G09020	6.4297	6.95541	6.77224	6.86149	6.70365	7.68229	6.76792	7.27786	0.538512	2.9754e-06	protein_coding	alpha 1,4-glycosyltransferase family protein
AT3G09830	9.00223	10.7674	9.38795	10.5567	9.21768	10.8526	9.44257	10.7402	0.0928341	0.00149769	protein_coding	Protein kinase superfamily protein
AT3G09910	8.80652	11.3663	9.48179	11.1382	7.91558	10.023	8.48371	10.5	2.3682e-05	1.74353e-07	protein_coding	RAB GTPase homolog C2B
AT3G10420	11.6687	12.3808	11.6477	12.8088	11.7785	12.5477	11.7875	13.1431	1.32842e-07	0.0178949	protein_coding	P-loop containing nucleoside triphosphate hydrolases superfamily protein
AT3G10820	8.53031	9.31937	8.57789	9.29054	8.36666	8.99792	8.6975	9.39964	0.246693	5.11418e-05	protein_coding	Transcription elongation factor (TFIIS) family protein
AT3G10930	8.37675	12.3118	8.71193	11.6969	8.72916	12.4109	8.86619	12.0541	3.45036e-06	2.95034e-08	protein_coding
AT3G10960	8.79238	11.2183	9.21349	10.9845	9.00602	11.6123	9.15383	11.2566	0.658418	0.0229651	protein_coding	AZA-guanine resistant1
AT3G11170	5.95377	7.00644	5.76991	7.56747	6.11579	6.9623	5.9716	7.74111	0.0758678	7.67842e-06	protein_coding	fatty acid desaturase 7
AT3G11410	10.7971	13.4772	10.7603	13.2546	10.7923	13.3749	10.5775	13.8383	1.48364e-11	2.2232e-10	protein_coding	protein phosphatase 2CA
AT3G11420	9.74332	11.2592	9.70422	11.4381	9.90493	11.3732	9.85463	11.6332	0.536242	0.0157171	protein_coding	Protein of unknown function (DUF604)
AT3G11430	8.13478	8.73377	7.18949	7.90784	8.08437	7.86673	7.10858	7.78558	1.21747e-10	1.20148e-08	protein_coding	glycerol-3-phosphate acyltransferase 5
AT3G11840	6.09252	9.11634	6.06172	8.71884	6.18188	9.53593	6.2202	9.14898	1.72603e-09	1.03913e-05	protein_coding	plant U-box 24
AT3G12910	5.13412	5.79525	5.01833	5.16692	4.8383	5.07647	4.74233	5.65705	0.445829	1.41259e-05	protein_coding	NAC (No Apical Meristem) domain transcriptional regulator superfamily protein
AT3G13080	8.64182	9.42622	8.5901	9.46304	8.75562	9.45889	8.72777	9.59376	0.000810393	1.75396e-09	protein_coding	multidrug resistance-associated protein 3
AT3G14225	5.69721	6.69463	5.82703	6.80872	5.73572	6.85068	5.50762	6.62455	0.0470228	0.00130798	protein_coding	GDSL-motif lipase 4
AT3G14260	6.78938	9.83911	7.15501	8.13522	7.54658	9.80867	6.64746	8.33285	4.43718e-05	3.85774e-11	protein_coding	Protein of unknown function (DUF567)
AT3G14440	6.89506	12.7254	7.0728	12.4132	7.04097	12.2603	6.83274	12.8623	0.00893453	2.75404e-19	protein_coding	nine-cis-epoxycarotenoid dioxygenase 3
AT3G14590	8.59499	10.7463	9.07577	11.0496	8.90165	10.718	9.08106	11.3257	0.0337259	1.0935e-05	protein_coding	Calcium-dependent lipid-binding (CaLB domain) family protein
AT3G14660	6.25617	7.1749	6.36082	7.15358	6.34358	6.86236	6.39879	7.46653	0.00302895	2.432e-09	protein_coding	cytochrome P450, family 72, subfamily A, polypeptide 13
AT3G14720	10.8414	11.9289	10.8377	11.2897	10.9844	12.1389	10.8605	11.2341	9.18219e-09	1.23774e-05	protein_coding	MAP kinase 19
AT3G14990	9.78294	10.7523	9.86581	10.9788	9.69107	10.5169	9.87447	10.9779	4.52471e-07	2.81217e-08	protein_coding	Class I glutamine amidotransferase-like superfamily protein
AT3G15210	8.34966	10.3086	9.27422	9.77546	8.79698	10.3371	9.01732	10.4222	1.71508e-07	0.018336	protein_coding	ethylene responsive element binding factor 4
AT3G15250	6.47525	8.69392	6.00088	7.16862	6.45823	8.80683	5.74744	8.27528	0.00504678	1.34197e-06	protein_coding
AT3G15350	10.5543	11.5413	10.549	11.4193	10.5187	11.3566	10.6388	11.4072	0.00137136	1.33086e-06	protein_coding	Core-2/I-branching beta-1,6-N-acetylglucosaminyltransferase family protein
AT3G15440	5.0617	5.6427	5.12943	6.10972	4.94647	6.26606	5.40207	6.83515	0.000712625	1.00662e-13	protein_coding
AT3G15518	8.0062	10.0035	8.04964	9.55738	8.02324	9.87795	8.06109	9.76567	2.82387e-07	3.21854e-09	protein_coding
AT3G15990	10.3033	11.998	10.3737	13.0121	10.5685	11.9773	10.45	12.6581	5.11489e-05	0.000238395	protein_coding	sulfate transporter 3;4
AT3G16510	8.28167	10.8384	8.92042	10.2382	8.40983	10.7767	8.86199	10.3291	0.908476	0.00147556	protein_coding	Calcium-dependent lipid-binding (CaLB domain) family protein
AT3G16560	8.43955	9.46437	8.55787	8.94542	8.44002	9.69518	8.76962	9.2214	0.000433652	0.000345192	protein_coding	Protein phosphatase 2C family protein
AT3G16720	10.6458	11.6832	10.8364	11.596	11.1068	11.7399	10.9346	11.7208	3.3136e-07	3.71276e-16	protein_coding	TOXICOS EN LEVADURA 2
AT3G16800	10.6561	11.3562	10.1832	11.6681	10.8568	11.1182	10.296	11.2212	0.029434	0.0324601	protein_coding	Protein phosphatase 2C family protein
AT3G16860	7.18698	9.86434	7.50061	9.41339	7.29755	9.6384	7.06987	9.57301	0.525333	0.000199374	protein_coding	COBRA-like protein 8 precursor
AT3G17130	9.55583	10.8772	8.66469	10.2462	9.35619	10.7718	8.74216	10.0073	0.000433299	1.00233e-08	protein_coding	Plant invertase/pectin methylesterase inhibitor superfamily protein
AT3G17690	7.27368	10.8904	7.41608	10.2644	7.73557	10.5463	7.55088	10.4978	0.0707276	1.63483e-05	protein_coding	cyclic nucleotide gated channel 19
AT3G17770	7.9944	9.00258	8.13234	9.47223	8.1619	9.22969	8.26253	9.68138	0.00155495	1.34632e-06	protein_coding	Dihydroxyacetone kinase
AT3G18290	8.99768	9.7148	8.73859	9.82725	8.88373	9.63861	8.88163	10.1892	0.171908	4.98048e-05	protein_coding	zinc finger protein-related
AT3G18490	10.9495	12.1256	10.9927	11.7205	10.9379	11.9343	10.8288	11.6502	0.000250948	2.71368e-06	protein_coding	Eukaryotic aspartyl protease family protein
AT3G18950	6.98119	9.52877	7.44307	9.14921	7.42729	9.76137	7.606	10.1079	0.92229	0.0250008	protein_coding	Transducin/WD40 repeat-like superfamily protein
AT3G19200	6.49188	8.41197	7.03151	8.27718	6.68662	8.74159	7.0857	8.4561	0.0203906	1.42066e-23	protein_coding
AT3G19270	5.29148	5.9413	5.17793	6.21375	5.43197	5.65386	5.33677	6.72461	8.98501e-08	2.79093e-12	protein_coding	cytochrome P450, family 707, subfamily A, polypeptide 4
AT3G19380	10.16	10.808	10.043	10.6887	10.1811	10.6152	10.261	11.0556	0.688125	2.67737e-19	protein_coding	plant U-box 25
AT3G19580	7.97746	11.9279	9.0724	11.9728	8.08382	11.8751	8.73932	12.3506	0.0566115	3.56723e-07	protein_coding	zinc-finger protein 2
AT3G19970	7.52432	8.86454	7.48503	8.6617	7.69578	8.57016	7.43971	8.965	0.0106943	2.25025e-05	protein_coding	alpha/beta-Hydrolases superfamily protein
AT3G20270	8.63804	8.89849	8.16994	8.92108	8.37999	8.70582	8.36712	9.53378	1.17253e-08	2.50942e-07	protein_coding	lipid-binding serum glycoprotein family protein
AT3G20310	8.98262	10.2202	8.58731	9.71481	9.16516	10.531	8.96909	10.2016	0.217724	2.08264e-21	protein_coding	ethylene response factor 7
AT3G20340	9.01975	11.1402	9.20761	11.0944	8.88456	10.925	9.02246	11.4333	0.289736	0.0406206	protein_coding
AT3G21410	5.01232	6.02328	5.23023	6.32366	5.00104	7.14219	5.05567	7.23906	1.18535e-05	0.00480942	protein_coding	F-box and associated interaction domains-containing protein
AT3G21520	6.19458	10.2353	5.43084	10.4707	6.77928	10.4757	6.75419	10.3654	0.435522	1.05855e-09	protein_coding	DUF679 domain membrane protein 1
AT3G21670	10.7744	11.7121	10.2759	12.0889	10.6361	11.8661	10.7052	12.1768	1.34663e-07	7.48315e-10	protein_coding	Major facilitator superfamily protein
AT3G21750	11.7537	12.8763	11.9536	13.0856	11.9268	12.9616	11.8168	13.0462	4.44383e-08	8.93306e-05	protein_coding	UDP-glucosyl transferase 71B1
AT3G21755	6.88058	7.8691	7.30156	8.17317	6.96462	8.46299	7.57272	8.57325	7.52521e-08	0.0304643	other_rna	other RNA
AT3G21760	10.3222	10.6697	9.91484	10.8051	10.0786	10.6257	10.0591	11.1502	0.0117782	6.76901e-07	protein_coding	UDP-Glycosyltransferase superfamily protein
AT3G21781	5.45132	6.52038	5.40896	6.29782	5.40944	5.93768	5.45859	6.37324	0.0030451	2.58879e-05	other_rna	other RNA
AT3G21890	8.84717	10.8848	8.82159	11.4339	8.90449	11.2216	9.13209	12.1217	6.44732e-06	0.00367387	protein_coding	B-box type zinc finger family protein
AT3G22275	5.07209	7.62257	5.07789	7.76377	5.25132	7.06315	5.25204	7.68648	0.774984	6.12949e-11	protein_coding
AT3G22370	9.03195	12.8016	9.58387	12.7559	9.1981	13.3178	9.45592	13.0923	5.5355e-08	1.42304e-06	protein_coding	alternative oxidase 1A
AT3G22380	11.0175	12.1189	10.9322	11.8073	11.1687	12.4212	11.1841	12.0543	1.52897e-06	1.07556e-07	protein_coding	time for coffee
AT3G22600	13.0354	14.1161	12.9003	14.2526	12.8992	13.5293	12.5478	13.6331	0.0297465	2.68691e-05	protein_coding	Bifunctional inhibitor/lipid-transfer protein/seed storage 2S albumin superfamily protein
AT3G22620	12.3852	13.4977	12.2714	13.7063	12.0763	12.6274	11.7369	12.8779	4.1011e-05	7.42622e-10	protein_coding	Bifunctional inhibitor/lipid-transfer protein/seed storage 2S albumin superfamily protein
AT3G22830	5.7023	12.8541	5.49557	11.163	5.62087	12.5117	5.20008	11.6956	4.49228e-05	0.000255848	protein_coding	heat shock transcription factor A6B
AT3G22910	6.985	11.6401	7.05901	11.5265	7.72218	12.2197	7.62001	11.6985	1.8308e-08	0.00434484	protein_coding	ATPase E1-E2 type family protein / haloacid dehalogenase-like hydrolase family protein
AT3G22961	5.29964	5.61751	5.17371	5.57237	5.24198	5.70019	5.36206	6.3855	0.000235593	2.60834e-08	protein_coding	Paired amphipathic helix (PAH2) superfamily protein
AT3G23000	8.44243	9.82824	8.5199	9.1169	8.39919	9.8845	8.48996	9.17326	0.0314859	2.46991e-09	protein_coding	CBL-interacting protein kinase 7
AT3G23030	13.2213	14.2428	13.1752	13.8255	12.5695	13.5358	12.9645	13.8685	1.56589e-09	0.0448321	protein_coding	indole-3-acetic acid inducible 2
AT3G23220	4.87701	7.77812	4.62385	7.3967	4.81373	6.04271	4.94319	7.9034	1.6817e-07	9.26932e-05	protein_coding	Integrase-type DNA-binding superfamily protein
AT3G23230	5.14439	7.70658	5.19724	7.79566	5.22378	6.55479	5.24643	8.2315	0.023003	3.14863e-07	protein_coding	Integrase-type DNA-binding superfamily protein
AT3G23250	6.11062	10.8142	6.49272	10.3886	6.34948	10.2863	6.57504	10.7595	0.00164829	4.67288e-06	protein_coding	myb domain protein 15
AT3G23550	6.0817	6.18883	5.02704	6.10796	6.04431	5.81778	4.85604	6.44322	1.01786e-07	4.44863e-06	protein_coding	MATE efflux family protein
AT3G23920	12.0718	14.3733	12.2754	14.9169	12.0413	14.2038	12.2438	15.0909	0.0113391	1.74103e-08	protein_coding	beta-amylase 1
AT3G24093	4.80126	6.00044	5.00004	5.49598	4.81008	6.3031	4.67487	5.06257	1.20646e-06	7.15053e-06	protein_coding	Paired amphipathic helix (PAH2) superfamily protein
AT3G24310	6.75431	11.7227	7.03348	11.083	6.58686	11.7055	6.80307	11.625	0.0203083	0.00217807	protein_coding	myb domain protein 305
AT3G25610	8.67625	10.1525	8.97775	10.1124	8.72494	10.3835	8.85799	10.1746	7.23254e-07	3.62229e-08	protein_coding	ATPase E1-E2 type family protein / haloacid dehalogenase-like hydrolase family protein
AT3G26310	9.09149	9.73593	8.4588	9.09623	8.72698	9.53015	8.98844	9.6993	0.000936482	9.29665e-05	protein_coding	cytochrome P450, family 71, subfamily B, polypeptide 35
AT3G29000	6.53748	11.3826	6.83797	10.3869	7.43049	11.6188	6.96191	11.0039	5.74433e-07	1.47017e-09	protein_coding	Calcium-binding EF-hand family protein
AT3G42556	5.74883	6.8083	5.53264	6.05792	5.49295	7.15933	5.81911	6.79506	0.000743096	0.0417541	transposable_element_gene	transposable element gene
AT3G45640	10.9287	12.318	10.9584	11.9093	11.2646	12.1718	10.9474	12.2082	0.000509362	4.00598e-05	protein_coding	mitogen-activated protein kinase 3
AT3G46090	6.02148	9.93152	6.34148	9.86097	7.23991	9.75553	6.55388	10.1202	0.532819	0.0088334	protein_coding	C2H2 and C2HC zinc fingers superfamily protein
AT3G47540	8.20914	8.7737	7.61363	8.61128	8.1658	8.54768	7.78376	8.7021	0.00265636	0.00740436	protein_coding	Chitinase family protein
AT3G48240	5.56656	7.32449	5.77975	7.13794	5.91243	7.14169	5.61693	7.64856	7.91842e-06	0.0441278	protein_coding	Octicosapeptide/Phox/Bem1p family protein
AT3G49760	7.24783	7.90266	6.77155	7.91865	7.35366	7.91312	6.65772	8.24629	0.0738522	0.010679	protein_coding	basic leucine-zipper 5
AT3G50930	8.5328	13.4455	8.69527	12.5087	9.35642	13.8891	8.87818	13.0281	6.74422e-09	0.0171732	protein_coding	cytochrome BC1 synthesis
AT3G50970	10.8255	14.6961	10.9317	15.4677	10.6798	13.5525	10.3011	14.6618	2.75212e-06	0.0302071	protein_coding	dehydrin family protein
AT3G52450	9.65679	10.8614	10.1219	10.6189	9.65513	10.498	9.67797	10.7301	0.00803577	0.0442837	protein_coding	plant U-box 22
AT3G52800	12.608	14.0263	12.9605	14.1821	12.8229	13.9978	12.8781	14.2135	0.00110573	0.00557838	protein_coding	A20/AN1-like zinc finger family protein
AT3G54950	11.2725	12.5851	11.0087	12.0538	11.1225	12.6503	10.6593	12.2775	1.12222e-09	0.000782397	protein_coding	patatin-like protein 6
AT3G55030	9.75034	10.5237	9.51463	10.0006	9.79115	10.4915	9.52547	10.2545	1.31897e-07	0.0316921	protein_coding	phosphatidylglycerolphosphate synthase 2
AT3G55880	8.45991	9.3913	8.80502	9.21581	8.39265	9.5127	8.66118	9.63416	0.000126979	0.0230592	protein_coding	Alpha/beta hydrolase related protein
AT3G56270	7.88097	8.56723	8.10054	8.6108	7.94672	8.66955	8.30835	8.95402	3.87791e-06	0.0186358	protein_coding	Plant protein of unknown function (DUF827)
AT3G56275	6.36964	11.1537	5.86988	10.2415	5.98915	10.1305	5.41992	10.209	8.65742e-06	4.66469e-07	pseudogene
AT3G56710	6.40885	9.82121	6.79096	8.61999	7.00334	10.5637	6.49797	9.31236	0.0504393	0.0412296	protein_coding	sigma factor binding protein 1
AT3G57120	9.25411	9.90047	9.1099	9.81796	9.34585	10.2173	8.91	10.2073	0.141445	3.5906e-07	protein_coding	Protein kinase superfamily protein
AT3G57210	5.78295	5.93972	5.37708	6.39096	5.52017	5.86324	5.28075	5.36536	0.2588	2.42733e-10	protein_coding	Protein of unknown function (DUF626)
AT3G57450	7.04879	9.42565	7.04674	8.54921	7.40773	9.39771	7.23003	8.94518	5.24206e-07	1.05611e-10	protein_coding
AT3G57530	12.4044	14.0808	12.6035	13.8368	12.4609	13.9904	12.4491	13.9125	1.08882e-08	2.69906e-08	protein_coding	calcium-dependent protein kinase 32
AT3G57540	8.49574	11.469	8.14726	11.0694	8.32142	10.9684	7.64313	10.8849	0.000241934	2.34405e-06	protein_coding	Remorin family protein
AT3G57700	5.61747	6.56765	5.8417	7.10899	6.04909	6.80801	5.84296	7.36429	5.98231e-12	2.64057e-08	protein_coding	Protein kinase superfamily protein
AT3G59220	11.8777	12.4791	11.7915	12.9898	11.7643	12.3828	11.6324	12.9141	0.010547	0.0301846	protein_coding	pirin
AT3G60220	8.86871	9.5738	8.72349	9.47398	8.717	9.16296	8.6737	9.85425	8.21865e-07	0.00129022	protein_coding	TOXICOS EN LEVADURA 4
AT3G60420	8.21419	8.81845	8.19242	8.98592	8.34392	8.82412	8.42472	9.28183	0.00244761	2.9603e-05	protein_coding	Phosphoglycerate mutase family protein
AT3G61420	9.58923	10.4629	9.68145	10.5293	9.6129	10.453	9.68815	10.7425	4.97186e-09	0.000317588	protein_coding	BSD domain (BTF2-like transcription factors, Synapse-associated proteins and DOS2-like proteins)
AT3G61580	8.86349	9.30761	8.2709	9.18982	8.77384	9.25735	8.84546	9.30382	4.00581e-05	0.00683032	protein_coding	Fatty acid/sphingolipid desaturase
AT3G61630	10.2254	12.5881	10.3482	11.9689	10.2594	13.2608	10.3919	12.7679	3.09862e-06	3.15783e-07	protein_coding	cytokinin response factor 6
AT3G61920	7.74337	7.92862	7.72642	7.98498	6.97434	7.69554	7.31031	7.91409	5.78524e-07	0.000678909	protein_coding
AT3G62100	7.85974	9.43393	8.03048	9.04758	8.19598	9.77252	8.16817	9.8841	0.0245179	1.33844e-06	protein_coding	indole-3-acetic acid inducible 30
AT3G62690	7.1368	9.00994	7.2206	8.03562	7.07966	8.87274	7.04246	8.51554	5.80524e-11	0.00193853	protein_coding	AtL5
AT3G63060	7.28912	12.1944	7.36016	11.5856	6.95803	11.406	7.08927	12.0032	0.00144356	0.000806593	protein_coding	EID1-like 3
AT3G63440	7.08899	8.19838	6.53295	6.95228	7.04504	8.3082	6.71559	8.0819	2.2681e-07	0.0289074	protein_coding	cytokinin oxidase/dehydrogenase 6
AT4G00850	7.85268	8.58488	8.0821	8.59305	7.43734	8.01166	7.6372	8.28136	2.33497e-06	1.18402e-05	protein_coding	GRF1-interacting factor 3
AT4G00940	7.51	8.3063	7.64444	8.22564	7.60325	8.84764	7.80553	8.54791	0.0242582	0.00531293	protein_coding	Dof-type zinc finger DNA-binding family protein
AT4G01280	10.1862	10.7178	10.1392	10.7653	10.1717	10.8966	10.2889	11.1443	0.21671	4.45048e-07	protein_coding	Homeodomain-like superfamily protein
AT4G01360	6.73521	11.1383	7.6442	10.5896	7.42127	10.6714	7.59463	10.6874	0.0719122	4.45299e-05	protein_coding
AT4G01520	5.87099	6.743	6.25047	7.00903	6.28053	7.04376	6.35436	7.34486	0.000161525	0.0343932	protein_coding	NAC domain containing protein 67
AT4G01540	8.4144	9.69659	8.91897	9.80775	8.61538	9.85402	9.0408	10.1617	0.0206197	0.0479645	protein_coding	NAC with transmembrane motif1
AT4G01550	6.11749	6.84105	6.43795	7.01616	6.27482	7.11339	6.50074	7.26906	0.000135116	0.014635	protein_coding	NAC domain containing protein 69
AT4G02715	8.09029	8.76199	8.12936	8.99016	8.52882	9.11877	8.58953	9.32689	1.43466e-05	0.000818368	protein_coding
AT4G02950	4.65583	6.04555	4.94395	5.86282	4.88526	6.06889	5.05509	5.98547	0.547888	2.44418e-05	protein_coding	Ubiquitin family protein
AT4G03360	4.76059	5.83975	4.70096	5.73379	5.19014	5.8866	4.85943	5.69827	0.00037411	2.20229e-07	protein_coding	Ubiquitin family protein
AT4G03540	8.6689	9.30814	7.85989	9.08522	8.82955	8.5956	8.15938	8.55849	0.864241	0.000164028	protein_coding	Uncharacterised protein family (UPF0497)
AT4G04175	5.11738	5.58785	4.90737	5.93277	5.01867	4.81364	5.04607	4.99657	3.42016e-07	0.00447638	transposable_element_gene	transposable element gene
AT4G04960	8.68383	9.6219	8.81268	9.50446	8.71325	9.95797	8.93362	9.74785	0.400719	4.04212e-07	protein_coding	Concanavalin A-like lectin protein kinase family protein
AT4G05010	9.04504	11.087	9.23126	10.7531	9.06769	11.1853	9.1102	11.1375	0.000416001	0.0488796	protein_coding	F-box family protein
AT4G05136	5.32202	6.2452	5.33995	5.83226	5.53982	6.38878	5.06999	6.30349	0.00150367	0.00021238	protein_coding
AT4G06534	6.3029	7.56174	6.09094	7.47983	6.29017	8.20366	6.28654	8.42192	1.67176e-06	2.62923e-10	protein_coding
AT4G06536	8.95394	10.777	8.61441	10.4591	8.70329	11.0812	8.41439	11.2499	0.70691	0.0235342	protein_coding	SPla/RYanodine receptor (SPRY) domain-containing protein
AT4G08040	7.18706	9.74865	7.02909	8.5821	7.90581	10.0342	6.83009	8.55473	0.409824	0.00372298	protein_coding	1-aminocyclopropane-1-carboxylate synthase 11
AT4G08555	8.16387	11.3891	8.92544	11.1045	7.98832	11.9308	8.84039	11.9443	0.0122531	0.00134308	protein_coding
AT4G09030	14.1757	14.8552	13.9856	14.9142	13.978	14.4398	13.725	14.72	2.07994e-12	0.010521	protein_coding	arabinogalactan protein 10
AT4G09490	8.50792	9.20964	7.99998	8.89492	8.45902	9.09529	8.23521	9.14418	2.35438e-08	0.0110345	protein_coding	Polynucleotidyl transferase, ribonuclease H-like superfamily protein
AT4G10890	8.79928	9.49849	8.53258	9.29485	8.75045	9.57278	8.63223	9.48777	1.09588e-06	0.000898928	protein_coding
AT4G11070	5.36282	8.1944	5.41321	7.81962	5.39012	9.04722	5.43256	7.63146	0.120683	1.61251e-07	protein_coding	WRKY family transcription factor
AT4G11220	10.2361	12.6037	10.0941	12.0544	10.3963	12.3295	10.1837	12.1728	7.24699e-05	0.00065868	protein_coding	VIRB2-interacting protein 2
AT4G11280	10.036	13.6959	10.0663	13.1618	10.1686	13.711	10.0665	13.5568	0.00307054	0.00550389	protein_coding	1-aminocyclopropane-1-carboxylic acid (acc) synthase 6
AT4G11350	7.06485	8.6007	7.20862	8.83108	7.14205	8.74692	7.42934	9.0035	3.01172e-08	0.049494	protein_coding	Protein of unknown function (DUF604)
AT4G11570	12.5329	13.6214	12.3283	13.6129	12.5604	13.6203	12.649	13.9791	4.61606e-06	0.0166008	protein_coding	Haloacid dehalogenase-like hydrolase (HAD) superfamily protein
AT4G12000	9.66116	11.6601	10.088	11.9488	9.82495	11.8363	10.1826	12.3534	9.62951e-05	9.9295e-08	protein_coding	SNARE associated Golgi protein family
AT4G12005	6.26794	7.37457	6.33589	7.22589	6.30865	6.93538	5.95014	7.24166	0.0383782	3.85274e-06	protein_coding
AT4G12735	6.15455	12.3745	6.69559	11.4861	6.76769	12.9852	6.88376	12.2011	0.009556	0.00417022	protein_coding
AT4G12990	8.2272	9.19215	8.6453	9.33611	8.54806	9.52254	8.80887	9.75884	0.275896	9.75231e-05	protein_coding
AT4G13800	5.69184	6.90566	5.69437	7.35633	5.33823	6.2672	5.73905	7.44241	0.0325594	0.000694141	protein_coding	Protein of unknown function (DUF803)
AT4G14365	7.7536	10.7421	7.44739	9.85244	8.79273	10.6655	7.91369	10.5079	0.421721	1.10424e-05	protein_coding	XB3 ortholog 4 in Arabidopsis thaliana
AT4G14990	11.5492	12.4457	11.6662	12.2727	11.4615	12.5679	11.5895	12.5293	0.267013	0.0321067	protein_coding	Topoisomerase II-associated protein PAT1
AT4G15120	7.46601	9.26966	7.21024	8.97279	7.4459	9.42845	7.14969	9.10322	0.00228751	0.0482265	protein_coding	VQ motif-containing protein
AT4G15210	7.72492	8.65108	6.28931	8.10414	7.06905	7.93221	6.29102	7.64462	0.0164711	0.00389436	protein_coding	beta-amylase 5
AT4G15760	7.19962	7.75163	7.41752	7.78262	7.27498	8.39374	7.46429	8.66103	3.01198e-06	2.00708e-06	protein_coding	monooxygenase 1
AT4G15975	6.67612	8.22585	6.67	7.71026	6.89568	7.41843	6.70179	8.31214	0.0177616	0.00614932	protein_coding	RING/U-box superfamily protein
AT4G16590	5.57765	6.07415	5.03687	6.81624	5.75635	5.98508	5.05151	5.97127	0.271208	1.22542e-06	protein_coding	cellulose synthase-like A01
AT4G17250	6.90188	8.06156	6.89591	7.87341	6.88368	8.02608	7.11588	8.26061	0.0116456	0.023381	protein_coding
AT4G17490	9.3544	12.7394	10.1828	12.9719	9.45041	12.354	9.87837	13.1289	0.000103196	0.0117735	protein_coding	ethylene responsive element binding factor 6
AT4G17615	8.56638	10.3204	8.85879	10.1126	8.7984	10.399	8.93106	10.3664	7.41926e-10	0.000392537	protein_coding	calcineurin B-like protein 1
AT4G17660	5.44792	6.27237	5.2526	5.96025	5.82764	6.16625	5.63019	6.85591	9.01414e-07	0.0226328	protein_coding	Protein kinase superfamily protein
AT4G17785	7.03186	11.2133	6.073	9.3488	6.92609	13.2026	5.92446	10.2267	4.1093e-09	0.0421943	protein_coding	myb domain protein 39
AT4G18170	6.38493	8.42374	6.64351	8.38285	6.53606	7.39409	6.75717	9.08088	0.00313101	0.0030076	protein_coding	WRKY DNA-binding protein 28
AT4G18700	12.7241	13.6192	12.4893	13.6369	12.8011	13.7349	12.6306	13.8722	0.115434	0.0107924	protein_coding	CBL-interacting protein kinase 12
AT4G18880	9.25085	11.3917	9.47931	11.2105	9.55033	11.7412	9.53921	11.428	0.819711	0.000649237	protein_coding	heat shock transcription factor A4A
AT4G19829	5.87747	6.56564	5.51198	6.26194	5.65835	6.37559	5.47954	6.2147	1.98787e-10	0.00075948	protein_coding
AT4G19925	5.12601	7.44225	4.9753	6.43837	5.1926	7.96996	5.13105	6.49826	0.689603	1.54565e-06	protein_coding	Toll-Interleukin-Resistance (TIR) domain family protein
AT4G20170	5.41161	6.06847	5.0094	5.57973	5.38905	6.12312	5.17574	6.27469	0.000838836	2.66193e-07	protein_coding	Domain of unknown function (DUF23)
AT4G20320	9.32225	10.5617	10.0178	10.806	9.32202	11.4025	9.66589	11.4059	4.0682e-05	8.72287e-06	protein_coding	CTP synthase family protein
AT4G20380	9.8692	10.7578	9.7955	10.613	9.93325	10.7868	9.95637	10.8505	1.5467e-11	1.87419e-05	protein_coding	LSD1 zinc finger family protein
AT4G20840	12.039	12.6569	11.9963	13.3213	12.0642	12.7146	12.1194	13.2074	5.38299e-05	0.000284927	protein_coding	FAD-binding Berberine family protein
AT4G20880	10.7089	11.8737	10.9022	12.1913	10.9404	12.212	11.1859	12.5514	9.18782e-11	0.000162511	protein_coding	ethylene-responsive nuclear protein / ethylene-regulated nuclear protein (ERT2)
AT4G21440	4.90478	7.31257	4.73972	8.00197	5.00052	7.5733	5.06988	8.43277	0.00690765	5.59207e-05	protein_coding	MYB-like 102
AT4G21940	8.15213	9.6884	8.39341	9.44529	8.11099	9.71567	8.52892	9.96629	1.83439e-12	2.87871e-08	protein_coding	calcium-dependent protein kinase 15
AT4G21990	8.18884	9.16569	8.51826	8.79798	8.25189	9.40974	8.05143	8.94482	7.78916e-07	0.00359979	protein_coding	APS reductase 3
AT4G22070	6.59618	7.20668	6.74184	7.19201	6.55264	7.51871	6.36953	6.9427	7.92858e-10	0.0305113	protein_coding	WRKY DNA-binding protein 31
AT4G23050	6.50217	8.06216	6.55799	8.5508	6.49827	8.04446	6.50947	8.84546	8.53152e-11	0.000105863	protein_coding	PAS domain-containing protein tyrosine kinase family protein
AT4G23190	9.02845	11.3464	8.89689	11.0154	9.29438	11.4417	9.05577	11.2585	5.97468e-08	0.000524367	protein_coding	cysteine-rich RLK (RECEPTOR-like protein kinase) 11
AT4G23215	5.3466	7.14783	5.12638	6.60637	5.43128	5.82479	4.99688	6.93351	0.0186307	0.000592071	pseudogene
AT4G23220	6.44138	7.97589	6.25788	8.18638	6.88267	7.13861	6.6333	8.83169	0.000591893	0.00709217	protein_coding	cysteine-rich RLK (RECEPTOR-like protein kinase) 14
AT4G23880	7.87782	8.99559	6.98291	8.6368	7.67441	9.02315	6.8758	8.75225	5.83186e-12	0.00454426	protein_coding
AT4G24960	11.3785	13.8424	11.3109	14.1666	11.3851	13.5576	11.3698	14.0767	0.611382	7.06226e-06	protein_coding	HVA22 homologue D
AT4G24972	9.1789	9.7245	8.77905	9.4955	9.22143	9.65488	9.23215	9.92177	2.50896e-10	0.00361547	protein_coding	tapetum determinant 1
AT4G25470	7.83475	12.2419	8.49347	11.6133	7.8127	10.8116	8.30183	12.3277	1.25337e-08	0.00912827	protein_coding	C-repeat/DRE binding factor 2
AT4G26180	9.68075	10.1725	9.93716	10.3926	9.84837	10.4322	10.0222	10.6957	0.000345459	0.0356502	protein_coding	Mitochondrial substrate carrier family protein
AT4G26470	9.37074	10.0917	9.59502	10.2349	9.42769	10.6776	9.32522	10.0595	0.650728	0.000325822	protein_coding	Calcium-binding EF-hand family protein
AT4G26700	11.347	11.9799	11.0298	11.8548	11.1984	11.9127	11.3534	12.1072	0.000372287	0.016461	protein_coding	fimbrin 1
AT4G26890	6.72947	9.18607	6.38034	8.62403	6.55449	8.54529	6.49913	8.89429	0.00133476	0.000407846	protein_coding	mitogen-activated protein kinase kinase kinase 16
AT4G27500	9.9156	10.7559	10.0149	11.0928	10.0964	10.9792	10.1207	11.2777	6.8461e-06	0.00784017	protein_coding	proton pump interactor 1
AT4G27520	16.0452	16.83	15.909	17.0826	15.9583	16.7151	16.051	17.1394	0.973508	5.44673e-09	protein_coding	early nodulin-like protein 2
AT4G27550	5.07095	5.42207	4.8665	5.89116	4.84932	5.49976	4.92074	5.59927	0.00260059	0.00189963	protein_coding	trehalose-6-phosphatase synthase S4
AT4G27560	10.715	11.4476	10.3805	11.8299	10.8965	11.3993	10.3241	11.7705	0.0867821	0.000260327	protein_coding	UDP-Glycosyltransferase superfamily protein
AT4G27580	5.86491	7.95214	5.77045	7.06059	6.1011	8.71838	6.15695	7.67796	0.00146623	4.55198e-08	protein_coding
AT4G27940	8.79697	9.66182	8.79381	9.34022	8.7016	9.73853	8.64958	9.55801	0.000148044	0.014396	protein_coding	manganese tracking factor for mitochondrial SOD2
AT4G28110	5.63897	8.70476	5.34084	7.75982	5.4477	7.5938	5.11864	7.44525	8.55803e-07	0.0216438	protein_coding	myb domain protein 41
AT4G28840	8.09067	10.4843	8.48611	10.2333	8.47084	10.4202	8.71447	10.6966	6.30695e-07	2.37442e-08	protein_coding
AT4G29110	7.85448	9.13829	7.68687	9.3178	8.01857	9.26279	8.19856	9.82173	0.000888488	0.00470115	protein_coding
AT4G29600	5.00076	5.35611	4.6343	5.16292	5.00288	5.06687	5.00556	5.63616	9.02726e-07	3.42188e-07	protein_coding	Cytidine/deoxycytidylate deaminase family protein
AT4G30210	9.59537	10.5089	9.35202	10.2022	9.56539	10.5411	9.29197	10.4682	8.08565e-07	1.55693e-05	protein_coding	P450 reductase 2
AT4G30280	11.4243	12.7654	11.7583	12.2004	11.705	12.8883	11.4178	12.4301	0.723522	3.38907e-08	protein_coding	xyloglucan endotransglucosylase/hydrolase 18
AT4G30430	5.8258	10.3117	5.75058	9.21077	6.37518	9.9892	6.15088	9.56185	8.91864e-11	7.61783e-11	protein_coding	tetraspanin9
AT4G31750	10.7193	11.2583	10.7359	11.6643	10.9752	11.4956	10.7861	11.7518	0.0631013	0.00649954	protein_coding	HOPW1-1-interacting 2
AT4G31800	12.2767	13.3484	12.3761	13.6069	12.4944	12.879	12.3447	13.6736	0.000128131	1.2551e-07	protein_coding	WRKY DNA-binding protein 18
AT4G32020	13.9425	15.1083	13.9594	14.9933	14.0189	15.2346	14.2094	15.3324	3.57476e-05	2.21308e-09	protein_coding
AT4G32630	5.00465	6.53643	5.0399	5.80496	4.99976	6.19506	4.80459	6.05035	4.14578e-08	0.0309481	protein_coding	ArfGap/RecO-like zinc finger domain-containing protein
AT4G32800	7.0001	6.85558	5.54917	6.70216	6.90127	6.50176	5.98244	6.81858	8.88672e-05	7.80448e-11	protein_coding	Integrase-type DNA-binding superfamily protein
AT4G32920	10.8126	11.5905	10.9151	11.479	10.4595	11.1652	10.5996	11.2764	1.65433e-07	0.00140692	protein_coding	glycine-rich protein
AT4G33050	6.64856	7.33734	6.69272	7.33825	6.72894	6.86146	6.85944	7.69778	0.00010187	7.3755e-08	protein_coding	calmodulin-binding family protein
AT4G33120	10.0732	11.3563	9.9594	11.3549	10.1269	10.9571	9.17108	10.8971	0.518874	0.000234427	protein_coding	S-adenosyl-L-methionine-dependent methyltransferases superfamily protein
AT4G33467	5.23761	7.25602	5.1428	8.50208	4.97076	6.58288	4.99133	8.85258	9.63448e-05	0.000649869	protein_coding
AT4G33666	8.67185	11.582	8.96648	11.6005	8.26563	11.7246	8.87115	12.6408	0.0165667	0.0208153	protein_coding
AT4G33930	5.56988	6.26348	5.09185	6.46305	5.43711	6.50704	5.32284	6.5288	0.00676484	0.000594611	protein_coding	Cupredoxin superfamily protein
AT4G33940	11.2983	11.9465	11.4671	12.1952	11.5725	12.2533	11.615	12.4144	0.00756994	3.1661e-05	protein_coding	RING/U-box superfamily protein
AT4G33985	8.54683	10.1936	8.94969	10.0442	8.84019	10.325	8.83071	10.4077	1.95995e-10	0.0226643	protein_coding	Protein of unknown function (DUF1685)
AT4G34000	11.7226	13.8655	11.8403	14.0319	11.9476	14.1314	11.8673	14.3402	6.1431e-07	0.0204401	protein_coding	abscisic acid responsive elements-binding factor 3
AT4G34131	10.1957	11.9195	10.7538	12.026	10.1857	11.5033	10.2444	11.7003	0.767093	0.0276017	protein_coding	UDP-glucosyl transferase 73B3
AT4G34150	12.2965	13.6337	12.1201	13.4153	12.3248	13.5	11.9909	13.678	0.170325	2.7008e-05	protein_coding	Calcium-dependent lipid-binding (CaLB domain) family protein
AT4G34210	6.4375	7.04761	6.15069	7.18135	6.64676	7.3544	6.19912	7.28429	0.0417278	0.000421141	protein_coding	SKP1-like 11
AT4G34390	9.86062	10.9121	10.1059	10.8604	9.93735	10.7172	10.0302	10.9085	0.00535742	0.038093	protein_coding	extra-large GTP-binding protein 2
AT4G34400	6.18248	8.50749	6.72062	7.3797	5.9764	8.75841	6.49855	7.84196	0.0537781	0.0207901	protein_coding	AP2/B3-like transcriptional factor family protein
AT4G34650	9.09773	10.2963	9.02185	10.1204	8.80987	9.81569	8.81413	9.99392	2.12668e-07	1.79883e-06	protein_coding	squalene synthase 2
AT4G35420	9.54984	9.84059	8.87547	9.27506	9.25357	9.37551	8.66494	9.26578	0.0113935	0.00171723	protein_coding	dihydroflavonol 4-reductase-like1
AT4G35470	7.28574	7.54421	6.80354	7.64133	7.30217	7.51394	7.0219	7.87431	4.66919e-08	0.00315579	protein_coding	plant intracellular ras group-related LRR 4
AT4G35550	10.383	11.2406	10.229	10.9228	10.1754	11.0238	9.98331	11.0448	0.594049	0.00271434	protein_coding	WUSCHEL related homeobox 13
AT4G36010	8.05193	9.17298	7.97536	9.38016	8.03562	9.06258	8.09832	9.5029	0.205935	0.0167666	protein_coding	Pathogenesis-related thaumatin superfamily protein
AT4G36030	8.66058	9.24956	8.64374	8.98091	8.77455	9.66114	8.74364	9.35826	0.00126437	0.00014389	protein_coding	armadillo repeat only 3
AT4G36830	7.36995	8.12203	7.41469	8.38042	7.40076	8.18886	7.07206	8.20379	0.311808	0.00367452	protein_coding	GNS1/SUR4 membrane protein family
AT4G36950	5.35489	9.82564	5.75992	11.1539	5.37797	9.3067	5.56712	10.6064	0.126756	0.00885312	protein_coding	mitogen-activated protein kinase kinase kinase 21
AT4G36988	5.00777	6.49571	5.30537	5.92367	5.11366	6.57746	4.94104	6.17411	0.0479545	9.42213e-05	protein_coding	conserved peptide upstream open reading frame 49
AT4G37030	6.31134	9.78852	6.5482	8.89475	6.31822	10.5163	6.3425	9.68794	0.00160937	0.0172915	protein_coding
AT4G37570	5.45847	6.30357	5.32628	5.69676	5.42186	6.51527	5.08261	6.43127	0.000503741	0.0376431	transposable_element_gene	transposable element gene
AT4G37770	6.08817	8.01904	5.73103	7.18541	5.71472	8.58714	5.66747	7.87234	0.00079793	0.0370156	protein_coding	1-amino-cyclopropane-1-carboxylate synthase 8
AT4G37790	10.5129	12.6085	10.9317	12.2019	10.5849	12.625	11.1553	12.7858	4.41749e-05	0.00299787	protein_coding	Homeobox-leucine zipper protein family
AT4G38140	5.4104	6.69225	5.58633	6.50485	5.4213	8.08766	5.38147	7.1692	0.281317	0.00739517	protein_coding	RING/U-box superfamily protein
AT4G38410	10.1913	10.0322	10.1188	11.3259	9.5751	10.4125	9.53697	10.7206	0.383118	0.029701	protein_coding	Dehydrin family protein
AT4G38560	6.15345	7.21201	6.1572	6.42443	6.46241	6.82209	6.31998	6.88379	0.111409	0.000159993	protein_coding	Arabidopsis phospholipase-like protein (PEARLI 4) family
AT4G39650	6.88343	8.98251	7.15449	8.88052	7.30516	9.74321	7.88042	9.37275	2.98837e-07	9.49152e-06	protein_coding	gamma-glutamyl transpeptidase 2
AT4G39670	7.90759	10.452	8.39319	10.3614	8.09562	10.2888	8.39719	10.2273	2.89691e-10	1.40255e-06	protein_coding	Glycolipid transfer protein (GLTP) family protein
AT4G39700	7.29871	9.17984	7.88371	9.11058	7.40296	9.379	7.5123	9.30752	4.82792e-05	1.35925e-05	protein_coding	Heavy metal transport/detoxification superfamily protein
AT4G39830	7.38473	8.74258	7.05605	8.98457	7.52448	9.15196	7.52013	9.30478	4.6783e-11	0.000426721	protein_coding	Cupredoxin superfamily protein
AT5G01100	5.16477	7.06575	5.45508	6.75046	5.13535	7.06192	5.11043	6.84348	2.9649e-10	1.99496e-09	protein_coding	O-fucosyltransferase family protein
AT5G01200	8.66371	9.49882	8.75109	9.64006	8.7883	9.65123	8.9257	9.97976	7.94644e-07	0.0434038	protein_coding	Duplicated homeodomain-like superfamily protein
AT5G01550	7.06561	9.8192	7.16771	9.68157	6.73346	10.5285	6.89178	9.81055	3.12708e-06	1.00515e-05	protein_coding	lectin receptor kinase a4.1
AT5G02020	7.89664	11.3801	8.69886	11.9799	7.77983	11.5317	8.67235	12.8502	1.66896e-06	0.0348866	protein_coding
AT5G02230	11.6932	14.1709	12.4051	14.1723	11.6507	14.0335	12.243	14.0502	0.0398867	0.0248422	protein_coding	Haloacid dehalogenase-like hydrolase (HAD) superfamily protein
AT5G02780	8.83585	10.1896	8.24014	9.5305	8.03827	9.55879	8.13798	9.63494	1.07214e-05	0.00641872	protein_coding	glutathione transferase lambda 1
AT5G03204	4.97347	8.13183	5.18947	8.70499	5.0439	7.41987	5.05367	8.57857	5.64044e-08	0.00050216	protein_coding
AT5G03210	4.88521	10.1643	4.85885	8.90387	4.94515	10.6175	4.92723	9.77277	1.01327e-06	0.00295061	protein_coding
AT5G04080	11.6113	12.3202	11.5284	12.5935	12.0423	12.4903	11.7947	12.7224	0.602242	1.61008e-05	protein_coding
AT5G05190	9.8182	10.6335	9.89721	10.5401	9.75539	11.0284	10.0186	10.7894	0.000268391	0.0253963	protein_coding	Protein of unknown function (DUF3133)
AT5G05300	5.46335	9.18498	5.7358	8.74782	5.65522	8.96806	5.66766	9.43126	0.0839643	0.0289057	protein_coding
AT5G05390	8.3997	9.92531	8.69225	9.19663	8.08124	8.82895	8.49709	8.97801	0.150256	4.36641e-07	protein_coding	laccase 12
AT5G05410	7.57454	11.9833	8.64722	12.6447	7.47862	11.571	8.21206	12.9317	0.422577	3.26124e-09	protein_coding	DRE-binding protein 2A
AT5G06080	5.75811	6.9181	5.66591	6.59889	5.83216	6.79402	5.82017	6.55086	0.000590475	0.0171612	protein_coding	LOB domain-containing protein 33
AT5G06300	9.60529	11.3784	10.1165	11.0235	9.38926	11.0601	9.86508	11.1559	0.403225	0.000447314	protein_coding	Putative lysine decarboxylase family protein
AT5G06320	11.307	13.4533	11.5815	13.6619	11.73	13.5203	11.5861	13.897	5.33545e-06	8.35506e-06	protein_coding	NDR1/HIN1-like 3
AT5G06530	11.6862	12.3474	10.3165	11.7634	11.4848	12.3562	10.6784	11.9144	4.73988e-07	1.65447e-06	protein_coding	ABC-2 type transporter family protein
AT5G07310	4.8983	5.90635	4.86063	5.78397	5.13861	5.99149	5.29816	6.17834	0.743173	1.92904e-06	protein_coding	Integrase-type DNA-binding superfamily protein
AT5G07680	8.66044	10.3333	9.16421	10.7918	8.72555	10.6206	8.78505	10.9169	0.0518556	0.000658315	protein_coding	NAC domain containing protein 80
AT5G08240	5.70357	9.82507	5.78262	7.91588	5.99678	10.4073	5.80149	8.64326	0.0316504	1.33146e-06	protein_coding
AT5G08250	6.69188	7.80648	5.63108	6.2649	6.52922	6.30198	5.81573	6.23113	0.000244941	0.0103754	protein_coding	Cytochrome P450 superfamily protein
AT5G08790	12.6854	15.2107	13.0921	15.4485	13.3411	15.5869	13.3108	15.9051	2.02813e-06	0.0113371	protein_coding	NAC (No Apical Meristem) domain transcriptional regulator superfamily protein
AT5G09876	5.01519	7.74519	5.07114	6.69366	5.2135	7.27149	5.12844	6.74329	0.0571761	0.000220817	protein_coding
AT5G09990	7.76411	8.80719	8.06429	8.71048	8.24482	9.06577	8.6732	9.43724	0.763591	1.37823e-06	protein_coding	elicitor peptide 5 precursor
AT5G10280	8.63583	9.25449	8.44063	8.90798	8.25751	8.91218	8.21386	8.8332	0.143225	0.0470132	protein_coding	myb domain protein 92
AT5G10380	6.75216	8.19391	6.45913	8.12878	7.6059	8.2914	6.87244	8.23006	0.20143	2.508e-09	protein_coding	RING/U-box superfamily protein
AT5G10410	8.32872	8.78466	8.50358	9.29566	8.233	9.11781	8.21821	8.9669	0.255792	1.17292e-05	protein_coding	ENTH/ANTH/VHS superfamily protein
AT5G10625	7.9777	9.41175	8.3234	9.14447	8.47118	10.1888	8.40613	9.58363	0.48649	0.000385474	protein_coding
AT5G10695	7.64637	10.2777	8.07892	10.6047	8.25939	10.5229	8.39498	10.9042	0.000119221	4.45209e-05	protein_coding
AT5G11070	13.1679	13.5229	12.58	13.6652	13.0207	13.3549	12.6726	13.7855	0.387063	3.14878e-06	protein_coding
AT5G11140	5.11306	7.65376	5.10793	6.81663	5.16571	8.43909	4.97942	7.37133	7.38588e-09	5.46156e-07	protein_coding	Arabidopsis phospholipase-like protein (PEARLI 4) family
AT5G11210	4.84758	6.49236	5.21261	6.51643	4.94647	6.94797	5.12461	6.51378	0.00561706	6.36977e-08	protein_coding	glutamate receptor 2.5
AT5G11290	5.93651	7.06814	5.85278	6.66602	6.05689	7.30895	5.79521	6.99706	0.549426	5.94049e-08	protein_coding	Plant protein of unknown function (DUF247)
AT5G11650	9.62788	12.2004	9.74171	11.8241	9.75385	12.4634	9.88962	12.2688	0.365324	5.42502e-07	protein_coding	alpha/beta-Hydrolases superfamily protein
AT5G12010	11.2449	12.338	11.1999	12.6394	11.2026	11.9259	11.1924	12.6745	4.85402e-06	0.0334553	protein_coding
AT5G12990	6.08186	6.8137	6.14285	7.11592	5.89732	6.56961	5.89771	7.11842	0.124349	0.000702152	protein_coding	CLAVATA3/ESR-RELATED 40
AT5G13170	11.3507	14.9083	11.1034	14.1891	12.2498	14.4433	10.7816	14.2315	5.11709e-07	2.69374e-05	protein_coding	senescence-associated gene 29
AT5G13200	8.98883	11.2735	9.29246	11.6475	8.96568	11.1629	8.8919	11.5669	3.4897e-07	0.000591362	protein_coding	GRAM domain family protein
AT5G13220	8.79476	11.4405	8.92964	12.1313	9.0919	11.1816	9.01174	11.6724	2.23023e-05	1.22995e-05	protein_coding	jasmonate-zim-domain protein 10
AT5G13320	5.48261	8.12483	5.44059	7.41167	5.57407	7.23606	5.61439	6.36285	0.00112372	3.7898e-05	protein_coding	Auxin-responsive GH3 family protein
AT5G13700	7.63755	8.92461	7.34805	8.62536	7.67509	8.11095	7.04163	8.80089	0.0960051	8.34628e-09	protein_coding	polyamine oxidase 1
AT5G13740	8.57094	10.0954	8.44057	10.2946	8.35861	9.86115	8.24401	10.3532	8.92717e-06	0.0178435	protein_coding	zinc induced facilitator 1
AT5G13750	7.20978	8.21863	7.32553	9.05449	7.20376	8.09805	7.03048	8.99442	0.0705294	6.57711e-06	protein_coding	zinc induced facilitator-like 1
AT5G13800	8.09256	9.04518	8.25244	9.33999	8.22696	9.21675	8.26213	9.25691	0.000449196	4.43791e-07	protein_coding	pheophytinase
AT5G13900	8.93907	9.62186	8.11843	9.28274	8.74674	8.53545	7.76164	8.42496	1.02937e-05	3.92448e-05	protein_coding	Bifunctional inhibitor/lipid-transfer protein/seed storage 2S albumin superfamily protein
AT5G14640	11.4827	12.1696	11.6967	12.3869	11.6367	12.5553	11.7073	12.3552	2.07127e-08	9.31466e-09	protein_coding	shaggy-like kinase 13
AT5G14680	7.0618	8.00496	7.061	8.4628	7.44063	8.29861	7.29142	8.47426	1.84307e-06	0.000273889	protein_coding	Adenine nucleotide alpha hydrolases-like superfamily protein
AT5G14730	4.99632	6.76681	4.92045	6.13104	5.01053	6.62835	4.7558	6.46478	0.62279	1.29797e-05	protein_coding
AT5G15190	8.08603	10.7411	8.03938	10.9492	7.70605	9.87531	7.68717	11.5765	0.153456	0.000372695	protein_coding
AT5G15660	5.06254	6.0968	4.8081	5.69501	4.90252	6.1112	4.8154	5.8757	0.20529	4.69782e-08	protein_coding	F-box and associated interaction domains-containing protein
AT5G15850	9.73222	10.6141	9.5152	10.8857	9.86705	10.9481	9.65983	11.6716	0.433461	0.000142485	protein_coding	CONSTANS-like 1
AT5G15948	12.8489	14.0429	12.2396	14.1578	12.772	14.0225	12.5102	14.0542	0.0446512	1.98027e-05	protein_coding	conserved peptide upstream open reading frame 10
AT5G15950	12.8976	14.153	12.3767	14.2405	12.8515	14.0677	12.5776	14.1029	0.00376088	1.31088e-08	protein_coding	Adenosylmethionine decarboxylase family protein
AT5G15960	6.28957	10.0857	5.59809	9.75191	6.31867	8.71801	5.86913	9.56586	3.45928e-06	1.66577e-07	protein_coding	stress-responsive protein (KIN1) / stress-induced protein (KIN1)
AT5G16600	7.55322	8.56963	7.72397	8.25099	7.618	8.71101	7.7826	8.48094	0.119719	1.01932e-08	protein_coding	myb domain protein 43
AT5G16770	6.86754	8.83154	6.53278	7.69016	6.72454	8.69354	6.4294	7.59043	1.96465e-08	3.25208e-08	protein_coding	myb domain protein 9
AT5G16910	9.65884	10.7156	9.52858	10.3602	9.59287	10.7648	9.54343	10.3668	6.99447e-10	0.00024748	protein_coding	cellulose-synthase like D2
AT5G16960	5.81741	7.73311	5.96943	9.05447	6.12757	7.90848	6.19217	9.5756	0.104369	1.08398e-06	protein_coding	Zinc-binding dehydrogenase family protein
AT5G17350	7.26199	10.8653	8.19124	10.2327	7.80207	10.6544	8.02089	10.7666	5.71903e-05	3.90235e-07	protein_coding
AT5G17650	8.9299	9.80454	8.70986	9.98866	9.46913	10.0935	8.98267	10.0548	0.786346	1.63023e-05	protein_coding	glycine/proline-rich protein
AT5G17850	8.88403	10.993	9.26779	11.6225	8.86639	10.7383	9.13073	11.5524	0.000334949	7.34848e-09	protein_coding	Sodium/calcium exchanger family protein
AT5G18270	6.02314	7.03574	6.13766	7.10518	6.05274	7.3202	6.24739	7.21474	0.411448	0.000996809	protein_coding	Arabidopsis NAC domain containing protein 87
AT5G18490	9.39363	10.0486	9.75877	10.3251	9.50704	10.3284	9.85017	10.565	0.0273062	0.000234728	protein_coding	Plant protein of unknown function (DUF946)
AT5G19110	10.7645	13.4161	11.4272	12.9259	10.7057	12.9143	10.7866	12.5756	0.231562	0.000670588	protein_coding	Eukaryotic aspartyl protease family protein
AT5G19850	9.53246	10.1015	9.10806	10.0392	9.56337	10.2263	9.492	10.4851	4.2782e-08	1.74566e-08	protein_coding	alpha/beta-Hydrolases superfamily protein
AT5G20270	12.4349	13.3656	11.8914	13.2459	12.1524	13.0636	12.0007	13.4142	0.00136143	0.000177046	protein_coding	heptahelical transmembrane protein1
AT5G22000	10.0439	11.1186	10.1091	11.2239	10.117	11.2291	10.198	11.3103	0.798928	0.000148332	protein_coding	RING-H2 group F2A
AT5G22270	10.3832	11.2481	10.2615	11.846	10.5478	11.5205	10.7386	12.2134	2.06219e-06	0.000157255	protein_coding
AT5G22530	5.64692	8.25239	5.5065	7.47979	5.84644	8.03404	5.5002	7.40737	0.782275	2.62346e-05	protein_coding
AT5G22540	5.08344	7.50755	5.64408	6.97909	5.64047	7.37538	5.58098	6.84996	0.0167449	7.53182e-09	protein_coding	Plant protein of unknown function (DUF247)
AT5G22690	8.25874	9.80529	7.91606	9.33197	8.2784	9.45586	8.01102	9.42137	0.374815	5.43384e-06	protein_coding	Disease resistance protein (TIR-NBS-LRR class) family
AT5G24030	11.6029	12.5034	11.2628	12.7415	11.7327	12.3867	11.5775	12.8349	0.988366	2.09317e-13	protein_coding	SLAC1 homologue 3
AT5G24080	5.4975	10.7537	5.686	11.3751	5.33464	10.4419	5.76692	12.042	1.67267e-09	3.06691e-06	protein_coding	Protein kinase superfamily protein
AT5G24110	6.66251	10.6202	6.06842	10.0982	6.44281	9.7946	5.98783	10.1786	0.865053	8.11932e-08	protein_coding	WRKY DNA-binding protein 30
AT5G24150	9.30243	10.8027	9.37631	10.821	8.93163	10.5697	9.6933	11.2226	0.00147569	6.34749e-05	protein_coding	FAD/NAD(P)-binding oxidoreductase family protein
AT5G24155	8.3437	9.90081	8.80355	9.71689	8.22848	10.194	8.94053	10.0204	0.612488	7.1313e-07	protein_coding	FAD/NAD(P)-binding oxidoreductase family protein
AT5G24270	7.49411	8.09605	7.45129	8.0943	7.6331	8.25533	7.13846	7.88002	0.23076	0.0114484	protein_coding	Calcium-binding EF-hand family protein
AT5G24800	9.57514	10.3173	9.5306	10.7315	9.79935	10.4657	9.6613	10.8747	2.51338e-08	0.00636962	protein_coding	basic leucine zipper 9
AT5G24920	8.53956	8.80302	8.13942	8.67855	8.62766	8.84339	8.08976	9.20744	1.33579e-06	0.0289814	protein_coding	glutamine dumper 5
AT5G25170	5.48239	6.35112	5.70174	6.27956	5.68661	6.66666	5.73595	6.75429	0.403872	1.79488e-05	protein_coding	PPPDE putative thiol peptidase family protein
AT5G25250	7.6919	11.5316	8.2062	10.3187	8.37813	12.592	7.80149	10.9766	0.00374971	0.0010931	protein_coding	SPFH/Band 7/PHB domain-containing membrane-associated protein family
AT5G26920	7.44073	11.886	7.68307	10.8747	5.48424	10.6499	5.50144	9.45657	7.33639e-05	0.00174432	protein_coding	Cam-binding protein 60-like G
AT5G27420	5.00763	7.44508	5.17946	7.06082	5.43851	8.46749	5.6373	7.61293	0.965331	0.0257424	protein_coding	carbon/nitrogen insensitive 1
AT5G28510	6.13558	9.66371	5.01758	8.13942	6.79679	9.21408	5.52289	8.07255	0.000745983	4.02786e-11	protein_coding	beta glucosidase 24
AT5G28610	6.59928	7.01784	6.88013	6.90432	6.5593	7.67514	6.76557	7.52484	0.00557423	5.70852e-05	protein_coding
AT5G32520	4.93234	5.19815	4.82472	4.9998	4.8601	5.42182	4.99464	5.92719	0.440653	0.0012017	transposable_element_gene	transposable element gene
AT5G35460	10.4583	11.1684	10.587	11.3363	9.76056	10.4643	9.81891	10.5821	0.0793076	4.65376e-07	protein_coding
AT5G35735	12.2466	13.6572	12.0643	13.5325	12.0819	13.0634	12.1034	13.4741	4.41394e-07	1.58438e-05	protein_coding	Auxin-responsive family protein
AT5G35805	5.19551	5.78539	5.10833	6.13265	5.24975	5.57545	5.23183	5.99139	5.12632e-08	2.3542e-07	transposable_element_gene	transposable element gene
AT5G35860	5.52899	6.29607	5.38356	5.8263	5.49974	6.54467	5.13759	6.58278	0.00141975	0.000191546	transposable_element_gene	transposable element gene
AT5G35970	12.1964	12.6919	12.0501	12.6652	12.2402	12.84	12.5817	13.0866	0.144018	0.000156933	protein_coding	P-loop containing nucleoside triphosphate hydrolases superfamily protein
AT5G36925	7.5414	9.76173	7.39714	9.54903	7.25426	9.38135	7.06362	9.95089	9.55992e-07	2.69307e-05	protein_coding
AT5G37500	9.17373	9.84244	8.70698	9.98753	9.26181	9.49391	8.79734	9.69209	0.48399	0.0007634	protein_coding	gated outwardly-rectifying K+ channel
AT5G37540	10.2781	13.2574	10.9872	13.6837	10.2919	13.3687	11.0803	13.8596	0.276732	8.92848e-05	protein_coding	Eukaryotic aspartyl protease family protein
AT5G37550	8.93651	10.0887	8.73331	9.97708	8.98475	10.1215	8.86104	10.1599	0.0121768	9.89827e-07	protein_coding
AT5G38037	5.4382	6.10927	5.25442	5.86029	5.22934	6.35301	5.28387	6.25325	0.00127943	4.63944e-06	transposable_element_gene	transposable element gene
AT5G38240	5.39412	6.32656	5.21721	5.76599	5.19765	6.20905	5.09134	6.11979	0.021077	0.0182372	protein_coding	Protein kinase family protein
AT5G39090	8.20413	8.45775	7.19578	8.56064	8.20183	8.40293	7.39822	8.48204	0.83854	3.73479e-05	protein_coding	HXXXD-type acyl-transferase family protein
AT5G39580	7.01718	10.3583	7.78927	10.3994	7.04638	10.6776	7.02931	10.2556	0.598228	2.54299e-06	protein_coding	Peroxidase superfamily protein
AT5G39660	8.69097	9.86473	8.92362	9.93285	8.78977	10.0083	9.00925	10.396	0.041288	0.000371946	protein_coding	cycling DOF factor 2
AT5G39670	5.83714	9.92739	5.87528	8.96244	6.37819	10.2272	6.06921	9.57485	0.215645	8.7764e-06	protein_coding	Calcium-binding EF-hand family protein
AT5G40000	5.44949	10.2723	5.27821	8.75178	5.74587	10.565	5.52236	9.36682	0.59409	0.0104886	protein_coding	P-loop containing nucleoside triphosphate hydrolases superfamily protein
AT5G40260	5.66161	8.7904	6.24411	8.00189	4.87925	9.24969	4.72883	7.603	0.825086	0.00112616	protein_coding	Nodulin MtN3 family protein
AT5G40540	10.2778	11.053	10.4086	10.8346	10.0034	11.315	10.2945	11.0383	0.0207081	0.000177664	protein_coding	Protein kinase superfamily protein
AT5G40670	10.0922	10.8086	10.172	10.6821	10.2921	11.3557	10.2686	10.867	0.252534	6.34477e-07	protein_coding	PQ-loop repeat family protein / transmembrane family protein
AT5G40680	5.53885	6.0176	4.96657	5.4905	5.04978	5.41329	5.10238	5.54502	0.661886	3.16047e-08	protein_coding	Galactose oxidase/kelch repeat superfamily protein
AT5G40690	10.1535	11.4876	10.4636	11.7265	10.0481	12.2422	9.93237	11.7071	0.275312	0.000375388	protein_coding
AT5G40790	5.15616	8.58531	5.12407	6.44257	4.92315	7.86748	5.05512	6.40248	0.0119279	1.17966e-05	protein_coding
AT5G40800	5.66098	7.81257	5.23545	7.57847	5.46563	7.30988	5.14448	7.35368	2.06672e-05	6.42119e-06	protein_coding
AT5G41100	8.36432	9.42433	8.21797	9.09265	8.447	9.64256	8.43329	9.29935	0.00621512	0.0235208	protein_coding
AT5G41550	5.21624	6.81809	5.27641	6.12077	5.16606	6.65941	5.25121	5.89265	1.90355e-05	3.74749e-05	protein_coding	Disease resistance protein (TIR-NBS-LRR class) family
AT5G41590	7.0874	8.95547	7.83229	8.98299	6.8055	9.29852	7.7878	9.67633	1.11403e-06	0.000128251	protein_coding	Protein of unknown function (DUF567)
AT5G41740	9.68012	11.9307	8.80332	10.9592	10.1255	12.0686	9.26321	11.5581	0.461316	0.00029706	protein_coding	Disease resistance protein (TIR-NBS-LRR class) family
AT5G41750	7.18142	11.3652	6.53532	10.0129	7.75722	11.1598	6.85572	10.7662	1.0691e-06	5.98587e-06	protein_coding	Disease resistance protein (TIR-NBS-LRR class) family
AT5G41755	5.05345	6.37074	5.28844	5.97339	5.15565	6.65968	5.04328	5.66527	0.159621	0.0159281	transposable_element_gene	transposable element gene
AT5G41900	7.5048	8.68468	6.92453	8.9641	7.63373	9.10892	7.51951	9.40594	2.68858e-08	1.01431e-05	protein_coding	alpha/beta-Hydrolases superfamily protein
AT5G42050	12.6994	14.3079	12.8777	14.5767	13.0223	14.465	12.9345	14.6605	0.0316862	0.00429527	protein_coding	DCD (Development and Cell Death) domain protein
AT5G42380	6.02561	13.3854	6.56066	12.0353	6.46861	13.0801	6.47741	12.2988	5.50029e-05	7.50098e-05	protein_coding	calmodulin like 37
AT5G42830	8.11277	9.51436	9.02215	9.72235	8.67677	10.7569	9.14633	10.3986	0.936487	8.28843e-06	protein_coding	HXXXD-type acyl-transferase family protein
AT5G42930	7.53469	11.1492	8.30473	10.1227	7.99702	11.1354	8.22727	10.1677	0.0235533	2.12848e-08	protein_coding	alpha/beta-Hydrolases superfamily protein
AT5G42965	6.82944	8.77641	6.55942	8.33872	6.80228	9.27664	6.77156	8.97838	0.954761	0.000319643	protein_coding	Polynucleotidyl transferase, ribonuclease H-like superfamily protein
AT5G43150	11.266	12.7235	11.2978	12.5524	11.2839	12.8492	11.0463	13.0847	3.13242e-07	1.14045e-06	protein_coding
AT5G43620	7.7326	11.9585	6.89274	10.9655	8.06358	11.9382	7.25031	11.6072	0.373638	0.00360656	protein_coding	Pre-mRNA cleavage complex II
AT5G43650	4.77212	11.0095	4.75161	10.5489	5.21251	10.7033	4.77957	10.4732	0.0585242	0.00674058	protein_coding	basic helix-loop-helix (bHLH) DNA-binding superfamily protein
AT5G44005	7.35224	8.80173	7.02372	7.98756	7.4562	8.68595	6.87591	8.66903	0.243584	5.67239e-07	protein_coding
AT5G44050	7.61393	8.52512	6.95584	9.16187	7.21027	7.28462	6.99908	6.89151	0.379317	5.24344e-06	protein_coding	MATE efflux family protein
AT5G44060	9.62227	10.4795	9.47066	10.4405	9.71053	10.3794	9.62201	10.4798	0.6315	7.79654e-06	protein_coding
AT5G44065	5.00778	8.08943	5.04101	7.10596	5.32409	8.26303	4.98845	7.33507	0.0984474	4.39523e-05	protein_coding
AT5G44350	7.75529	11.0228	7.61817	10.029	7.89821	10.658	7.43154	10.3806	1.6758e-07	0.000453287	protein_coding	ethylene-responsive nuclear protein -related
AT5G44910	9.16103	9.4391	9.14363	9.7176	8.90616	9.68906	8.67083	9.55741	2.08779e-10	0.000110845	protein_coding	Toll-Interleukin-Resistance (TIR) domain family protein
AT5G44990	4.87394	5.96602	4.80281	5.40154	4.92839	6.88674	5.6396	5.91808	2.26289e-06	0.000153922	protein_coding	Glutathione S-transferase family protein
AT5G45340	9.38079	10.7845	9.60043	10.4276	9.52142	10.8456	9.32668	11.2902	0.000222357	1.27209e-06	protein_coding	cytochrome P450, family 707, subfamily A, polypeptide 3
AT5G47220	10.6833	12.9167	11.7208	13.5295	9.63063	10.7972	10.2445	11.7938	0.0852669	2.28626e-07	protein_coding	ethylene responsive element binding factor 2
AT5G47560	7.42824	8.514	6.99235	8.51154	6.44793	7.43878	6.454	8.07634	0.000977857	0.000211414	protein_coding	tonoplast dicarboxylate transporter
AT5G47640	11.373	13.4851	11.2899	13.162	11.1619	13.552	11.315	13.6818	0.000424644	5.07231e-07	protein_coding	nuclear factor Y, subunit B2
AT5G47850	4.91533	8.95039	5.0833	7.69543	4.88566	9.61617	4.92814	8.015	3.8497e-05	3.63812e-08	protein_coding	CRINKLY4 related 4
AT5G50100	10.9965	11.7472	10.8546	11.583	9.70594	10.4596	9.67251	10.8323	0.0723674	0.00359728	protein_coding	Putative thiol-disulphide oxidoreductase DCC
AT5G51190	9.67189	12.4966	10.5518	11.4902	10.0778	12.1093	10.0983	11.7882	0.120364	4.93855e-10	protein_coding	Integrase-type DNA-binding superfamily protein
AT5G51830	8.27314	8.99108	8.34775	9.19696	8.08286	8.91671	8.12677	9.33538	3.56675e-08	0.000508946	protein_coding	pfkB-like carbohydrate kinase family protein
AT5G51990	5.14592	8.31362	4.96727	7.968	4.94117	7.6157	4.97624	8.49326	0.935491	0.00054621	protein_coding	C-repeat-binding factor 4
AT5G52020	6.92033	8.48532	7.02145	8.06063	6.97732	8.49719	6.92368	7.89849	2.89202e-07	0.000542021	protein_coding	Integrase-type DNA-binding superfamily protein
AT5G52050	9.8393	12.5642	9.64067	12.6321	9.41875	11.9336	9.80361	12.7421	0.00142808	7.54158e-05	protein_coding	MATE efflux family protein
AT5G52300	8.90958	13.9599	9.05683	14.9912	8.87203	13.7368	8.92392	15.2098	2.76751e-07	2.46628e-05	protein_coding	CAP160 protein
AT5G52390	6.32908	7.2678	5.10186	6.5722	6.8976	6.13138	5.1484	5.64073	0.425825	2.68995e-07	protein_coding	PAR1 protein
AT5G52420	13.1806	13.7694	12.9657	13.7507	13.0965	13.87	13.0649	14.1864	1.73043e-06	0.00043522	protein_coding
AT5G52510	11.1628	11.7257	11.43	11.9551	10.5876	11.3197	11.0491	11.5469	0.0134164	1.39859e-10	protein_coding	SCARECROW-like 8
AT5G52570	9.70367	10.2404	9.28761	10.3503	9.62926	10.2757	9.38643	10.3521	0.0452196	6.66035e-09	protein_coding	beta-carotene hydroxylase 2
AT5G52750	8.15255	11.6273	7.68932	10.8601	9.50547	11.9123	8.47274	11.7422	0.89506	6.34585e-07	protein_coding	Heavy metal transport/detoxification superfamily protein
AT5G52810	12.0644	12.3035	11.101	11.6722	11.8198	12.0664	11.1601	11.841	0.768885	0.00232372	protein_coding	NAD(P)-binding Rossmann-fold superfamily protein
AT5G53110	8.9948	9.23631	9.31803	9.93918	8.41626	9.65514	8.38799	9.82699	0.10798	0.00669567	protein_coding	RING/U-box superfamily protein
AT5G53710	5.60742	10.0478	5.46883	10.4749	5.50253	9.90898	5.68081	11.4084	9.30832e-07	1.63854e-06	protein_coding
AT5G53990	8.93195	10.0511	8.79121	10.0124	8.28584	9.0591	7.96086	8.99249	0.347625	0.00556072	protein_coding	UDP-Glycosyltransferase superfamily protein
AT5G54110	10.9046	11.2945	10.9785	11.212	10.2083	10.8247	10.3293	10.6438	0.544321	0.000324806	protein_coding	membrane-associated mannitol-induced
AT5G54170	11.4652	12.0131	11.3253	12.2461	11.4453	11.389	10.8976	11.7379	3.13034e-05	1.88969e-07	protein_coding	Polyketide cyclase/dehydrase and lipid transport superfamily protein
AT5G54230	5.85494	7.49198	5.71146	7.79229	5.57981	7.43963	5.47187	7.55827	7.68448e-07	2.0156e-05	protein_coding	myb domain protein 49
AT5G54470	8.10549	8.9448	8.98197	8.99513	7.92322	9.6794	8.79133	10.2224	0.370818	2.52523e-05	protein_coding	B-box type zinc finger family protein
AT5G54490	9.94911	13.6598	10.2874	12.5947	10.3034	13.7158	10.5263	13.775	0.272074	1.82379e-05	protein_coding	pinoid-binding protein 1
AT5G54730	9.28059	9.86738	9.32668	10.2385	9.38227	9.89005	9.30743	10.3206	0.04382	1.24061e-05	protein_coding	homolog of yeast autophagy 18 (ATG18) F
AT5G54840	8.57295	9.61731	8.72196	10.1476	8.18359	9.19088	8.22934	9.13706	4.6893e-05	1.32043e-06	protein_coding	Ras-related small GTP-binding family protein
AT5G55090	7.11407	9.2894	7.31512	9.08026	7.03022	8.87915	7.3446	9.76819	0.823331	9.22566e-08	protein_coding	mitogen-activated protein kinase kinase kinase 15
AT5G55400	10.9256	11.6497	11.0078	11.8274	11.1305	12.1349	11.2615	12.4255	0.126959	0.00398209	protein_coding	Actin binding Calponin homology (CH) domain-containing protein
AT5G56160	7.50568	8.9643	8.1261	8.66765	7.37901	8.95706	7.88711	8.8647	1.9114e-05	0.0439695	protein_coding	Sec14p-like phosphatidylinositol transfer family protein
AT5G56270	10.5126	11.4097	10.7555	11.3397	10.3941	11.1389	10.5095	10.9311	0.835203	3.66916e-05	protein_coding	WRKY DNA-binding protein 2
AT5G56980	9.74804	11.7652	9.6472	11.9125	9.73592	11.1738	9.67673	11.9641	2.99899e-06	0.0442815	protein_coding
AT5G57190	7.80312	8.26483	7.59825	8.61589	7.81716	8.28089	7.47054	8.37155	0.731854	7.27263e-06	protein_coding	phosphatidylserine decarboxylase 2
AT5G57340	9.56246	11.28	10.5628	11.1696	10.535	11.729	11.4778	12.0612	0.0118879	0.000209821	protein_coding
AT5G57510	5.43036	9.3667	5.83079	8.60816	6.01821	10.9333	6.26091	9.7191	5.79936e-05	3.62127e-05	protein_coding
AT5G57560	10.9976	13.1153	10.7411	13.2461	11.1134	12.4253	10.8531	13.4027	0.0124471	0.000122242	protein_coding	Xyloglucan endotransglucosylase/hydrolase family protein
AT5G57810	5.92308	8.63263	5.6724	8.12658	5.4357	5.89798	5.37876	5.99522	0.173796	0.000219759	protein_coding	tetraspanin15
AT5G57910	9.98214	10.3779	10.0062	10.9225	9.84999	10.2699	9.61918	10.5292	0.498315	0.000916919	protein_coding
AT5G58160	8.21701	9.06107	8.14211	9.43047	7.85894	9.20405	8.00095	9.68594	0.00177493	6.65599e-07	protein_coding	actin binding
AT5G58430	10.256	11.4741	10.2935	11.4264	10.3589	11.5998	10.4095	11.5285	7.48497e-08	1.65105e-05	protein_coding	exocyst subunit exo70 family protein B1
AT5G58620	10.3455	11.2961	10.4662	11.1848	10.5356	11.7261	10.5786	11.3386	0.303542	5.78687e-08	protein_coding	zinc finger (CCCH-type) family protein
AT5G58670	8.41744	10.2143	9.13515	10.0333	8.34106	9.30852	8.77439	9.28876	5.25283e-05	3.05238e-08	protein_coding	phospholipase C1
AT5G58690	5.82289	7.2011	5.94084	6.58883	6.26142	7.54935	6.1794	6.9172	7.56989e-07	1.30643e-08	protein_coding	phosphatidylinositol-speciwc phospholipase C5
AT5G59220	5.55518	10.8748	5.47736	11.1381	5.19373	8.5952	5.32986	9.97171	0.621634	1.03559e-06	protein_coding	highly ABA-induced PP2C gene 1
AT5G59310	7.36091	10.7827	6.56881	9.65153	6.63878	9.37652	5.85814	9.28276	2.62161e-05	3.16614e-05	protein_coding	lipid transfer protein 4
AT5G59320	8.8673	10.9489	9.35451	10.796	7.95724	10.0763	7.92253	10.0336	0.397699	5.28297e-09	protein_coding	lipid transfer protein 3
AT5G59330	9.26366	10.5847	9.36279	10.4341	8.06483	9.26887	7.8023	9.50496	0.00705004	4.20824e-07	protein_coding	Bifunctional inhibitor/lipid-transfer protein/seed storage 2S albumin superfamily protein
AT5G59490	8.36909	10.8372	8.91532	10.716	7.47911	10.3416	7.76205	10.2749	1.25275e-06	4.00991e-08	protein_coding	Haloacid dehalogenase-like hydrolase (HAD) superfamily protein
AT5G59510	7.36265	8.90751	7.23805	9.26031	7.04514	8.3019	6.76706	9.5019	0.00835123	4.92298e-05	protein_coding	ROTUNDIFOLIA like 5
AT5G59550	10.9237	12.5294	10.9064	12.2657	11.0127	12.4567	11.0768	12.6655	2.03011e-05	3.06521e-10	protein_coding	zinc finger (C3HC4-type RING finger) family protein
AT5G59760	7.8532	8.27875	7.2715	7.27127	7.04201	7.85166	6.35061	7.90629	0.519684	5.6248e-05	protein_coding	Protein of unknown function (DUF1635)
AT5G59790	9.83947	10.4389	10.1817	10.0438	10.1975	11.0726	10.5483	10.4871	1.63762e-06	3.32454e-05	protein_coding	Domain of unknown function (DUF966)
AT5G60850	11.0709	11.8687	10.8111	11.2226	10.9019	11.7922	11.0659	11.9142	0.000204621	3.0233e-07	protein_coding	OBF binding protein 4
AT5G60890	10.9697	12.4005	11.1677	12.1519	10.6885	11.9576	10.7638	11.7052	0.862309	2.87498e-05	protein_coding	myb domain protein 34
AT5G61455	5.67931	7.22189	5.34938	6.39985	5.61482	7.09506	5.35897	6.51928	0.973084	0.000423596	small_nuclear_rna	U2.7; snRNA
AT5G61600	9.5951	12.3587	10.0083	11.768	9.62268	11.8648	9.81789	11.8997	4.13344e-05	7.28271e-06	protein_coding	ethylene response factor 104
AT5G61890	5.89837	8.29677	6.26896	8.92606	6.37903	8.68398	6.52552	9.0981	0.604505	1.06488e-06	protein_coding	Integrase-type DNA-binding superfamily protein
AT5G62020	5.79238	7.89002	5.64456	6.73251	5.67984	7.92233	5.1323	6.55709	0.452777	0.036078	protein_coding	heat shock transcription factor B2A
AT5G62430	9.36299	10.7893	9.07438	10.3058	9.81498	11.2729	9.7512	11.0464	0.0553465	1.36431e-06	protein_coding	cycling DOF factor 1
AT5G62480	8.25215	10.865	8.44109	10.1622	8.1111	11.4374	7.89811	10.3034	0.00293679	0.000296845	protein_coding	glutathione S-transferase tau 9
AT5G62570	11.102	12.542	10.9073	12.1703	11.4678	12.3686	11.4416	12.3102	0.050189	0.0152769	protein_coding	Calmodulin binding protein-like
AT5G63130	6.43891	9.40114	6.33783	8.33173	6.50698	9.28161	5.86738	8.58062	0.238112	1.61043e-09	protein_coding	Octicosapeptide/Phox/Bem1p family protein
AT5G63905	10.5712	11.2651	10.7582	11.4526	10.9809	11.5024	10.9967	11.7479	4.3961e-07	1.0999e-06	protein_coding
AT5G64070	10.2762	10.7145	10.158	10.7695	9.46796	10.0316	9.4918	10.2237	0.000114584	5.85649e-05	protein_coding	phosphatidylinositol 4-OH kinase beta1
AT5G64310	13.115	15.2068	13.482	14.9117	13.0808	14.8487	13.1414	14.9481	0.0579138	3.28205e-05	protein_coding	arabinogalactan protein 1
AT5G64660	11.0721	12.499	11.5166	12.1238	11.5359	12.8173	11.5867	12.4279	0.000626428	0.00532063	protein_coding	CYS, MET, PRO, and GLY protein 2
AT5G64700	8.37656	8.90416	7.99144	8.72119	8.17013	8.90814	7.95491	9.00042	0.0213447	0.000549268	protein_coding	nodulin MtN21 /EamA-like transporter family protein
AT5G64750	6.54432	8.39801	6.81545	8.87861	6.44149	7.47971	6.55953	8.83103	0.000589371	0.000125943	protein_coding	Integrase-type DNA-binding superfamily protein
AT5G64870	5.82566	12.0235	6.65906	11.0082	5.66198	8.86131	5.15756	8.77653	5.40692e-07	0.00291889	protein_coding	SPFH/Band 7/PHB domain-containing membrane-associated protein family
AT5G64890	6.5105	8.00522	6.72318	7.77837	6.14079	7.29421	5.91095	6.92373	0.106893	9.15884e-08	protein_coding	elicitor peptide 2 precursor
AT5G65300	9.56834	12.12	10.074	11.9918	9.57575	11.5952	9.92457	11.7146	0.0174214	2.78115e-06	protein_coding
AT5G65470	13.3021	14.3304	13.1066	14.1757	13.2197	14.0076	13.0498	14.1018	1.12932e-08	1.54704e-07	protein_coding	O-fucosyltransferase family protein
AT5G65600	5.40475	7.25091	5.46549	7.15375	5.72316	7.2419	5.85565	7.74976	0.355821	9.8295e-06	protein_coding	Concanavalin A-like lectin protein kinase family protein
AT5G65790	9.51022	10.8816	9.5812	10.4469	9.46367	11.4501	9.40596	10.4573	1.11588e-12	0.000159154	protein_coding	myb domain protein 68
AT5G65890	9.00456	10.0667	9.13888	9.99198	8.35962	9.4671	8.84414	9.88291	0.837889	0.0260465	protein_coding	ACT domain repeat 1
AT5G65990	12.3065	13.1656	12.2335	13.5679	12.3985	13.1006	12.3037	13.5775	0.197491	1.67655e-05	protein_coding	Transmembrane amino acid transporter family protein
AT5G66045	4.91903	6.1902	5.05431	5.72314	4.97969	6.27676	4.95123	6.42123	0.764558	0.000373633	mirna	MIR170; miRNA
AT5G66460	9.47457	11.1388	9.24742	10.7662	9.69964	11.1933	9.25838	10.588	2.79369e-09	1.82803e-05	protein_coding	Glycosyl hydrolase superfamily protein
AT5G66640	6.45857	9.37026	6.19294	8.52957	7.24996	9.45151	6.88749	9.02022	2.1016e-06	1.14608e-06	protein_coding	DA1-related protein 3
AT5G66670	5.32869	6.97905	5.81163	6.88565	5.36579	7.9537	5.68391	6.95888	1.61204e-06	3.05192e-05	protein_coding	Protein of unknown function (DUF677)
AT5G66675	10.5782	11.3561	10.8736	11.4223	10.9717	11.6687	10.9879	11.5025	2.00654e-07	1.84523e-05	protein_coding	Protein of unknown function (DUF677)
AT5G66850	9.8761	10.5161	9.70268	10.0809	9.57329	10.2561	9.49074	10.1171	0.819277	0.00459641	protein_coding	mitogen-activated protein kinase kinase kinase 5
AT5G67140	8.96877	10.7744	9.56186	10.8241	8.93601	10.5293	9.42985	10.7889	0.0153179	1.17653e-06	protein_coding	F-box/RNI-like superfamily protein
AT5G67300	5.32531	7.44451	4.94099	6.64043	5.43195	6.82187	5.25654	7.09648	1.14718e-05	0.0301243	protein_coding	myb domain protein r1
AT5G67370	11.3334	11.8377	10.6846	11.4371	10.8824	11.4567	10.6345	11.6716	0.104203	1.40093e-06	protein_coding	Protein of unknown function (DUF1230)
AT5G67480	12.6052	14.1106	12.615	14.3024	12.6374	13.9367	12.4999	14.2286	0.158528	0.000273829	protein_coding	BTB and TAZ domain protein 4
1) Genes with a significant change in expression were selected using the following criteria: an expression log_2 ratio > 0.5 and a controlled p-value
(FDR; Benjamini and Hochberg, 1995) from t-test analysis < 0.05 in WT, hda19-3, quad, and quint between normal and salinity stress conditions.
																		0
																		0
																		0
																		0
																		0
																		0
																		0
																		0
																		0
																		0
																		0
																		0
																		0
																		0
																		0
																		0
																		0
																		0
																		0
																		0
																		0
																		0
																		0
																		0
																		0
																		0
																		0
																		0
																		0
																		0
																		0
																		0
																		0
																		0
																		0
																		0
																		0
																		0
																		0
																		0
																		0
																		0
																		0
																		0
																		0
																		0
																		0
																		0
																		0
																		0
																		0
																		0
																		0
																		0
																		0
																		0
																		0
																		0
																		0
																		0
																		0
																		0
																		0
																		0
																		0
																		0
																		0
																		0
																		0
																		0
																		0
																		0
																		0
																		0
																		0
																		0
																		0
																		0
																		0
																		0
																		0
																		0
																		0
																		0
																		0
																		0
																		0
																		0
																		0
																		0
																		0
																		0
																		0
																		0
																		0
																		0
																		0

## Sheet: S6
Supplemental Table S6. Genes classified into Group 4 in Figure 1C
AGI code	Col-0	Col-0 NaCl	hda19	hda19 NaCl	quad	quad NaCl	quint	quint NaCl	one-way ANOVA	BH FDR	function	annotation
AT1G01600	10.7348	10.9034	9.93111	10.4135	10.9472	11.5173	10.3791	10.3866	0.00189074	3.21353e-10	protein_coding	cytochrome P450, family 86, subfamily A, polypeptide 4
AT1G01900	10.5405	10.6826	9.67815	10.1331	10.5372	10.7451	10.1046	10.1599	0.000111917	1.12404e-08	protein_coding	subtilase family protein
AT1G02065	6.57608	6.43748	5.47797	5.6098	6.41976	6.02089	5.74077	6.06513	2.44082e-05	2.22214e-07	protein_coding	squamosa promoter binding protein-like 8
AT1G02810	9.09795	9.55605	8.67596	7.91465	9.07016	10.6133	8.39175	8.11557	3.74908e-08	0.00485266	protein_coding	Plant invertase/pectin methylesterase inhibitor superfamily
AT1G03440	10.0972	10.3323	9.10227	9.5022	10.0383	10.1765	9.43134	9.8245	5.36742e-10	3.48577e-07	protein_coding	Leucine-rich repeat (LRR) family protein
AT1G03820	10.8135	10.3015	10.3462	9.57524	11.1034	11.1243	10.4432	9.92147	0.000426145	0.00716255	protein_coding
AT1G04330	9.32082	9.2998	8.82136	8.3084	9.28037	9.82181	8.80175	8.91702	0.0306199	9.0026e-09	protein_coding
AT1G04800	15.3841	15.3794	14.1041	14.0631	15.2341	15.3847	14.668	14.4127	3.66696e-07	7.29101e-06	protein_coding	glycine-rich protein
AT1G08165	7.46	7.78608	5.55027	5.61278	7.36077	7.55147	6.04023	6.21491	0.20591	1.6944e-08	protein_coding
AT1G08810	10.1608	10.1287	8.62166	8.10274	9.95745	9.99213	8.98976	8.37867	1.42682e-09	3.03731e-06	protein_coding	myb domain protein 60
AT1G10380	7.87065	8.37745	7.48849	7.28882	8.17788	8.45083	7.30411	7.15943	1.95241e-06	1.71794e-06	protein_coding	Putative membrane lipoprotein
AT1G11340	7.91872	7.92504	6.5687	6.32336	7.82639	8.13868	7.07936	6.86809	0.000124877	0.00124989	protein_coding	S-locus lectin protein kinase family protein
AT1G11450	11.4045	11.2046	10.9569	10.338	11.9701	12.1695	11.2194	10.6977	0.289056	5.25827e-11	protein_coding	nodulin MtN21 /EamA-like transporter family protein
AT1G11460	11.2397	11.0822	10.7778	9.90022	11.5785	11.7148	10.7605	10.3584	0.0791315	1.86485e-07	protein_coding	nodulin MtN21 /EamA-like transporter family protein
AT1G12480	7.02615	7.3297	6.01589	6.02308	7.38679	7.65079	6.39155	6.64097	0.724513	0.00137061	protein_coding	C4-dicarboxylate transporter/malic acid transport protein
AT1G14600	10.1486	10.3222	9.88307	9.43445	10.4542	10.5658	10.1115	9.36316	0.480163	1.04981e-10	protein_coding	Homeodomain-like superfamily protein
AT1G15150	8.10499	8.16074	5.61821	5.55057	7.68142	7.49647	5.37185	5.22379	2.09637e-16	9.34126e-07	protein_coding	MATE efflux family protein
AT1G15160	7.66658	7.53194	5.55097	5.50259	7.39549	7.18231	5.52823	5.63595	0.00111442	1.22064e-06	protein_coding	MATE efflux family protein
AT1G16410	12.0269	11.4212	8.75047	7.41539	11.7892	11.0253	8.40822	7.20702	0.0210646	0.0320964	protein_coding	cytochrome p450 79f1
AT1G21230	6.10682	6.41371	5.19591	5.07593	6.88784	7.30442	5.4219	5.20676	4.3068e-08	0.0199191	protein_coding	wall associated kinase 5
AT1G22340	7.0155	6.77352	5.38154	5.21106	7.60446	7.46166	5.80096	5.58243	8.18529e-08	0.0249121	protein_coding	UDP-glucosyl transferase 85A7
AT1G22690	12.3974	12.0776	9.02957	8.89734	12.7783	12.3747	10.1814	9.6571	1.22023e-08	1.08637e-08	protein_coding	Gibberellin-regulated family protein
AT1G23110	6.36226	6.921	5.98098	5.86455	6.33526	6.45383	5.89816	6.04168	5.77116e-07	1.15029e-05	protein_coding
AT1G23730	9.4272	9.895	8.76873	8.80037	10.3804	10.2445	9.8433	8.62384	2.52559e-06	0.000400589	protein_coding	beta carbonic anhydrase 3
AT1G24400	7.8097	8.32306	6.71888	7.01978	7.9207	8.3686	7.17721	7.58868	0.0217495	7.91317e-07	protein_coding	lysine histidine transporter 2
AT1G24430	7.75335	8.20263	6.9022	6.91542	8.02714	8.7059	6.7235	7.72693	1.08612e-06	0.00192088	protein_coding	HXXXD-type acyl-transferase family protein
AT1G24577	8.97195	8.84399	7.38862	7.14141	8.94749	8.85647	8.10413	7.59328	1.92766e-06	2.88341e-07	protein_coding
AT1G25440	11.6413	11.7752	10.8323	10.9408	11.9392	12.039	11.1535	10.8726	0.000562468	8.82559e-07	protein_coding	B-box type zinc finger protein with CCT domain
AT1G26762	8.24853	9.02155	7.61204	7.50323	8.27561	8.91032	8.37241	8.03319	2.77045e-09	9.66192e-05	protein_coding
AT1G29000	7.03963	6.49308	6.09279	5.5463	7.13215	6.7402	6.20254	6.12003	0.00225467	0.00167019	protein_coding	Heavy metal transport/detoxification superfamily protein
AT1G29020	7.02776	7.07451	7.93076	6.89218	8.30959	8.59964	7.96259	6.92336	0.0960462	0.0405354	protein_coding	Calcium-binding EF-hand family protein
AT1G31320	11.2616	11.4741	11.3819	10.0529	10.8937	11.8214	10.7067	10.784	0.963264	1.09703e-11	protein_coding	LOB domain-containing protein 4
AT1G31690	7.82339	7.39872	4.96885	4.88079	8.66974	8.1765	4.95808	4.7927	0.334528	4.524e-07	protein_coding	Copper amine oxidase family protein
AT1G32520	10.8769	11.099	10.0345	10.0373	10.8649	11.0569	10.8001	10.9734	0.390028	7.46236e-07	protein_coding
AT1G33320	6.60879	6.57664	5.76915	5.61468	6.82024	6.57469	5.87351	5.57595	9.02785e-10	0.00163179	protein_coding	Pyridoxal phosphate (PLP)-dependent transferases superfamily protein
AT1G33720	5.92899	6.02756	4.96766	5.11782	5.73962	5.74818	5.20264	5.06757	6.00318e-06	1.41781e-06	protein_coding	cytochrome P450, family 76, subfamily C, polypeptide 6
AT1G33900	6.95129	6.23456	4.9469	4.93822	7.09332	6.28426	5.08671	5.01725	0.000888705	0.0244552	protein_coding	P-loop containing nucleoside triphosphate hydrolases superfamily protein
AT1G33930	7.62753	7.54533	6.2152	5.86774	7.22845	6.96342	6.20206	6.02253	0.00311462	2.03095e-05	protein_coding	P-loop containing nucleoside triphosphate hydrolases superfamily protein
AT1G35290	8.83025	8.44536	6.80639	6.20241	8.57288	8.79054	7.10043	6.77225	0.538905	0.00403774	protein_coding	Thioesterase superfamily protein
AT1G35310	7.84849	7.01921	5.45144	5.00263	7.71561	7.17295	5.3953	5.17999	8.96789e-07	0.019635	protein_coding	MLP-like protein 168
AT1G35610	5.56883	5.75346	5.50816	5.00218	5.76335	6.04403	5.37887	5.25341	2.00077e-09	7.42121e-07	protein_coding	Cysteine/Histidine-rich C1 domain family protein
AT1G43040	5.88014	5.90397	5.56802	5.17823	6.20433	6.43772	5.70531	5.266	0.306075	3.96076e-08	protein_coding	SAUR-like auxin-responsive protein family
AT1G45616	9.56976	9.75727	8.32212	8.49088	9.4932	9.89116	8.51437	8.22444	0.000986784	0.000302571	protein_coding	receptor like protein 6
AT1G46480	9.56069	10.0344	9.47741	8.91619	9.63929	10.3376	9.66727	9.20879	0.000141824	1.96266e-05	protein_coding	WUSCHEL related homeobox 4
AT1G49130	10.4836	11.1055	9.43531	9.76951	10.5961	11.0037	10.0024	9.79067	0.00248992	0.00488427	protein_coding	B-box type zinc finger protein with CCT domain
AT1G49370	8.9581	8.07712	5.67637	5.10379	8.85981	8.37146	5.86369	5.28674	0.251447	2.43682e-09	pseudogene
AT1G49640	6.83509	6.69616	5.79391	5.91245	6.63498	7.28681	5.74636	5.76241	0.0226201	1.39224e-05	protein_coding	alpha/beta-Hydrolases superfamily protein
AT1G52120	6.52902	7.07841	5.45207	5.62849	6.57232	6.60814	5.80812	5.37047	1.07092e-05	0.0142994	protein_coding	Mannose-binding lectin superfamily protein
AT1G52430	7.56908	7.75065	7.10126	7.08141	7.70074	7.66804	7.17005	6.70818	0.198231	3.02227e-06	protein_coding	Ubiquitin carboxyl-terminal hydrolase-related protein
AT1G53980	6.39387	6.7099	5.88029	6.04053	6.24612	6.80322	5.75545	6.13819	0.000277315	5.33196e-07	protein_coding	Ubiquitin-like superfamily protein
AT1G55010	8.58803	8.89757	6.14877	6.24123	8.4345	8.15748	5.82181	5.91454	0.000152374	2.02884e-05	protein_coding	plant defensin 1.5
AT1G55390	7.50328	7.62483	6.97188	6.38355	8.00481	7.81923	7.43283	6.95434	0.0354635	0.000465401	protein_coding	Cysteine/Histidine-rich C1 domain family protein
AT1G56320	7.782	7.35726	6.60381	6.77771	7.52584	8.04732	6.82697	6.8406	5.78013e-08	1.41355e-09	protein_coding
AT1G59730	10.0598	9.93156	9.52941	8.47427	10.1879	10.2666	9.69746	8.861	0.033437	0.0392223	protein_coding	thioredoxin H-type 7
AT1G61300	9.36867	9.3785	7.48648	7.43967	9.07155	9.05477	7.9154	7.72539	6.95499e-06	5.91068e-05	protein_coding	LRR and NB-ARC domains-containing disease resistance protein
AT1G62400	7.99431	7.74115	7.02388	6.60318	7.88391	7.95664	7.29492	7.05584	3.87437e-05	2.01476e-07	protein_coding	Protein kinase superfamily protein
AT1G62560	13.438	13.489	10.5615	10.8289	13.4229	13.3406	10.7197	10.7368	0.0150259	0.000232647	protein_coding	flavin-monooxygenase glucosinolate S-oxygenase 3
AT1G62630	9.60949	9.35506	8.58004	8.19407	9.29944	9.26092	9.01171	8.67107	2.95209e-08	0.0338956	protein_coding	Disease resistance protein (CC-NBS-LRR class) family
AT1G63360	9.18284	9.00505	8.37569	8.13396	8.9839	8.84051	8.68135	8.43568	2.88641e-07	0.00168334	protein_coding	Disease resistance protein (CC-NBS-LRR class) family
AT1G64405	8.80843	8.31776	8.2641	7.27675	8.78014	9.15685	8.12146	7.57001	0.0163064	8.23792e-05	protein_coding
AT1G65450	6.51546	6.32125	4.90977	4.974	5.99765	5.84226	4.98928	4.81475	0.0165436	0.0358216	protein_coding	HXXXD-type acyl-transferase family protein
AT1G65481	8.69782	8.73797	7.34593	7.58761	8.70583	9.18607	7.69684	8.4808	0.421402	0.00299551	protein_coding
AT1G65484	9.03758	8.65391	7.30275	6.46147	8.92676	9.45644	6.82436	6.94056	1.67568e-05	1.78907e-05	protein_coding
AT1G65486	10.5441	10.5598	9.16114	9.27015	10.462	10.3704	9.74913	10.0263	0.940813	5.99204e-08	protein_coding
AT1G65860	10.5801	9.91848	8.52721	7.66738	10.8851	10.1203	8.8792	7.81686	0.000217038	4.36472e-07	protein_coding	flavin-monooxygenase glucosinolate S-oxygenase 1
AT1G66910	8.74576	9.21479	7.64531	7.6467	8.5393	8.92906	7.61293	7.98777	0.0562169	2.146e-07	protein_coding	Protein kinase superfamily protein
AT1G66990	7.87126	7.85593	7.02144	6.87114	7.90746	7.91117	7.54215	7.08057	0.000181268	1.1446e-08	pseudogene
AT1G67790	7.36856	7.24785	6.93237	6.16796	7.28363	7.84038	7.01475	6.28078	0.923888	1.47719e-08	protein_coding
AT1G68850	8.48969	8.48949	7.68174	7.18852	8.56954	8.28384	7.4862	7.5829	0.0581037	5.76136e-10	protein_coding	Peroxidase superfamily protein
AT1G69150	5.90986	6.4374	5.44877	5.42851	5.651	6.72771	5.4477	5.37873	1.52145e-08	2.9913e-05	protein_coding	Cysteine/Histidine-rich C1 domain family protein
AT1G69230	7.81881	7.69299	6.43606	6.16791	7.39815	7.07516	6.1683	5.89716	1.61093e-05	0.00118926	protein_coding	SPIRAL1-like2
AT1G69730	9.91228	9.63298	7.95074	7.57705	10.0695	9.98666	8.93679	8.1976	2.06201e-09	1.12371e-05	protein_coding	Wall-associated kinase family protein
AT1G70810	10.5907	11.0008	9.50338	9.51883	10.826	10.9526	9.40664	9.30658	3.72749e-07	0.00178771	protein_coding	Calcium-dependent lipid-binding (CaLB domain) family protein
AT1G74090	14.1952	14.111	13.3882	13.3092	14.3356	14.3293	13.4375	13.4201	1.40732e-05	4.693e-05	protein_coding	desulfo-glucosinolate sulfotransferase 18
AT1G74650	8.96603	8.88047	7.7577	8.25106	9.16341	8.74066	8.62611	8.62008	1.54368e-06	4.27492e-08	protein_coding	myb domain protein 31
AT1G74660	10.8504	10.6492	10.8834	9.95984	10.8329	11.3213	10.8326	10.2598	7.16387e-08	2.31992e-05	protein_coding	mini zinc finger 1
AT1G75040	7.25493	7.3055	5.28181	5.70589	7.25268	6.99926	5.56659	5.39409	0.0185312	3.19555e-05	protein_coding	pathogenesis-related gene 5
AT1G75120	9.32709	9.29566	8.17888	7.70219	9.27776	8.90556	8.16661	7.36341	0.0322395	3.36636e-09	protein_coding	Nucleotide-diphospho-sugar transferase family protein
AT1G75820	12.4831	12.6063	12.2754	11.6344	12.4666	12.795	12.164	11.6145	0.715425	0.0428762	protein_coding	Leucine-rich receptor-like protein kinase family protein
AT1G78370	16.4601	16.4719	15.4705	15.4138	16.4743	16.4736	15.417	14.9898	2.64745e-05	1.80018e-11	protein_coding	glutathione S-transferase TAU 20
AT1G80130	14.1753	14.6828	13.3635	13.9001	14.8385	15.1804	14.2794	14.0861	0.269981	3.19503e-10	protein_coding	Tetratricopeptide repeat (TPR)-like superfamily protein
AT1G80730	7.06003	6.69571	6.59219	5.20757	7.3504	7.37738	6.69405	6.1705	9.45584e-11	2.05481e-07	protein_coding	zinc-finger protein 1
AT1G80760	10.6028	10.574	9.81221	8.93544	10.918	10.8641	10.5081	9.62582	3.78318e-08	1.13352e-07	protein_coding	NOD26-like intrinsic protein 6;1
AT2G01918	11.0756	10.8766	9.97296	9.73773	10.756	10.6966	9.66341	9.74772	0.0237575	0.000438372	protein_coding	PsbQ-like 3
AT2G03200	9.30349	8.78819	8.43974	7.88107	9.24373	8.7455	8.26071	8.22217	0.122123	0.00515126	protein_coding	Eukaryotic aspartyl protease family protein
AT2G13810	7.61686	8.09569	5.77599	6.29471	7.52276	8.12724	5.08094	5.44313	1.3288e-05	7.29077e-08	protein_coding	AGD2-like defense response protein 1
AT2G14440	6.32261	5.95338	5.44663	5.3286	6.47196	6.36997	5.69572	5.3994	0.0248871	4.74683e-07	protein_coding	Leucine-rich repeat protein kinase family protein
AT2G14510	7.40528	6.92992	6.24505	5.93863	7.6183	7.32314	6.57306	5.96705	0.650501	1.38942e-13	protein_coding	Leucine-rich repeat protein kinase family protein
AT2G15130	7.4972	6.80794	6.04201	5.23998	8.4483	7.68273	6.95704	5.9009	0.70134	1.31736e-09	protein_coding	Plant basic secretory protein (BSP) family protein
AT2G15390	10.7865	10.521	10.9056	10.37	10.792	11.3233	10.6742	10.2597	0.000109397	3.53899e-05	protein_coding	fucosyltransferase 4
AT2G17050	6.98444	6.83458	5.70903	5.4419	7.25135	7.08025	5.59593	5.64319	1.16823e-07	7.59787e-07	protein_coding	disease resistance protein (TIR-NBS-LRR class), putative
AT2G17060	7.31828	7.09109	6.52468	6.0825	7.35957	7.13646	6.59404	6.13339	0.857742	0.0271135	protein_coding	Disease resistance protein (TIR-NBS-LRR class) family
AT2G18370	9.763	9.42101	9.03542	8.60604	10.0413	9.62532	9.1335	9.36342	0.310096	1.48925e-06	protein_coding	Bifunctional inhibitor/lipid-transfer protein/seed storage 2S albumin superfamily protein
AT2G19150	8.1712	8.43752	6.98335	6.64255	8.59884	8.86476	7.60091	7.30187	7.60011e-06	0.0416511	protein_coding	Pectin lyase-like superfamily protein
AT2G21890	7.74479	7.7297	6.55616	6.33215	7.27334	7.44449	6.98072	6.69837	2.53917e-06	0.047052	protein_coding	cinnamyl alcohol dehydrogenase homolog 3
AT2G25130	6.61071	6.95903	6.45974	5.73731	6.64667	6.59884	6.61075	5.97563	0.573659	2.38441e-07	protein_coding	ARM repeat superfamily protein
AT2G29170	9.22087	9.03896	7.56116	7.36009	8.97255	8.80558	8.62766	8.23235	9.8021e-07	0.0073684	protein_coding	NAD(P)-binding Rossmann-fold superfamily protein
AT2G29360	13.5019	13.4546	12.8384	12.4125	13.2441	13.1143	13.188	12.7933	0.00499442	0.000220097	protein_coding	NAD(P)-binding Rossmann-fold superfamily protein
AT2G29940	6.95788	7.3792	6.01757	6.44422	7.00862	7.4442	6.30034	6.74497	1.43369e-05	5.21795e-05	protein_coding	pleiotropic drug resistance 3
AT2G32880	9.69017	9.43175	7.31078	7.77057	9.63321	9.2564	7.21165	6.73626	3.00536e-06	1.94963e-05	protein_coding	TRAF-like family protein
AT2G33850	10.3038	10.5354	8.3467	7.99532	10.1144	9.87394	8.18594	6.97375	8.63459e-09	2.25841e-06	protein_coding
AT2G34700	8.32109	7.89615	6.56831	5.91107	8.50666	7.71352	6.66109	6.32311	0.065454	5.87317e-05	protein_coding	Pollen Ole e 1 allergen and extensin family protein
AT2G34920	6.90394	7.10454	6.46728	6.20931	6.73846	7.3368	6.34714	6.44008	1.39044e-06	3.07667e-09	protein_coding	RING/U-box superfamily protein
AT2G35000	8.08039	8.11859	7.89309	7.68705	7.96871	8.51214	7.42793	7.90359	7.96177e-05	1.2742e-08	protein_coding	RING/U-box superfamily protein
AT2G35945	7.74628	8.14079	7.01137	7.21419	7.66013	8.25578	7.18988	7.656	0.0134265	4.08051e-06	other_rna	other RNA
AT2G36430	6.75058	6.84336	5.91432	5.57573	6.72774	7.18235	5.92263	5.75342	9.43169e-12	0.0329852	protein_coding	Plant protein of unknown function (DUF247)
AT2G36690	10.7935	10.8591	10.8641	9.79591	10.9113	11.3755	11.1157	10.3954	7.63292e-11	0.0370179	protein_coding	2-oxoglutarate (2OG) and Fe(II)-dependent oxygenase superfamily protein
AT2G38090	7.17862	7.19607	7.16818	6.64495	7.19163	7.74623	7.34587	6.85723	5.84609e-12	3.44445e-06	protein_coding	Duplicated homeodomain-like superfamily protein
AT2G38110	9.18455	8.98071	8.15336	7.61067	9.31152	9.00495	8.21541	8.04528	0.530505	2.23127e-08	protein_coding	glycerol-3-phosphate acyltransferase 6
AT2G38300	9.05707	8.67542	8.2204	8.02677	9.22942	9.12621	8.31261	8.13067	0.00931934	6.15898e-07	protein_coding	myb-like HTH transcriptional regulator family protein
AT2G38920	6.32357	6.22121	5.7491	5.45763	6.52117	6.44091	5.55736	5.52761	0.335213	0.00680604	protein_coding	SPX (SYG1/Pho81/XPR1) domain-containing protein / zinc finger (C3HC4-type RING finger) protein-related
AT2G38995	5.36219	5.79092	4.90253	4.78784	5.34879	5.32101	4.9163	5.09504	3.46859e-11	7.18447e-05	protein_coding	O-acyltransferase (WSD1-like) family protein
AT2G39370	6.7286	7.0921	6.66522	6.13059	7.08646	7.75493	6.34342	6.53575	0.0101202	8.68801e-05	protein_coding
AT2G40260	9.27792	8.79136	8.71639	8.30678	9.35307	9.32319	8.82349	8.51419	0.000191585	6.16164e-08	protein_coding	Homeodomain-like superfamily protein
AT2G40370	8.60712	8.64556	7.67118	7.58033	8.62475	8.40328	7.56507	7.82646	0.000109086	0.000182886	protein_coding	laccase 5
AT2G41090	15.1705	15.4432	14.0219	13.6966	15.7834	15.7895	14.4014	13.818	5.2576e-09	9.74677e-10	protein_coding	Calcium-binding EF-hand family protein
AT2G41510	6.93632	6.43437	6.01617	5.26872	7.34825	7.29866	6.43083	5.86664	5.70934e-07	1.30668e-07	protein_coding	cytokinin oxidase/dehydrogenase 1
AT2G41690	5.77252	5.91268	5.09298	5.26952	6.20222	6.24776	5.35916	5.51221	0.516172	4.96792e-11	protein_coding	heat shock transcription factor B3
AT2G43100	12.5059	12.2933	11.2372	10.6916	12.7462	12.6511	11.354	10.5788	3.5577e-07	0.000113935	protein_coding	isopropylmalate isomerase 2
AT2G45450	10.4552	10.3316	9.54418	9.4255	10.2952	10.0531	10.064	9.80858	4.21649e-06	0.00380336	protein_coding	protein binding
AT2G46070	9.58881	10.1442	8.38667	8.98992	9.46348	10.0787	8.77448	9.49261	1.85517e-08	1.65374e-07	protein_coding	mitogen-activated protein kinase 12
AT2G46640	8.74675	9.44532	6.41341	7.96112	8.94435	9.38376	5.94482	7.62249	3.81497e-06	1.2023e-05	protein_coding
AT3G01345	13.65	13.4733	5.8493	6.13821	13.4834	13.3995	13.3886	13.0324	0.155869	0.0330242	protein_coding	Expressed protein
AT3G01350	9.1794	9.38303	8.67678	8.29599	8.94949	9.41256	8.79223	8.68807	0.0336682	3.40855e-08	protein_coding	Major facilitator superfamily protein
AT3G02020	12.1407	11.9452	10.7057	10.178	12.2436	11.9812	10.6272	10.2687	0.0223844	0.026663	protein_coding	aspartate kinase 3
AT3G03530	7.77358	7.40971	6.81585	6.59931	7.65929	7.61348	6.88111	6.93947	0.0538592	5.38982e-08	protein_coding	non-specific phospholipase C4
AT3G09162	11.4515	11.3175	9.75357	9.24147	11.7748	11.7346	9.76369	9.61721	0.000438046	0.000916847	protein_coding
AT3G10570	9.33008	9.76142	8.49633	8.13997	9.28182	9.71783	8.85496	8.35667	5.20444e-07	1.22337e-05	protein_coding	cytochrome P450, family 77, subfamily A, polypeptide 6
AT3G11385	6.16312	5.85483	6.37322	5.53073	6.57039	6.4735	6.13591	5.6274	0.446595	0.00283446	protein_coding	Cysteine/Histidine-rich C1 domain family protein
AT3G12720	7.29292	7.68051	6.30629	6.17506	7.04669	7.86944	6.19229	7.17468	0.0145281	3.89302e-06	protein_coding	myb domain protein 67
AT3G15356	11.8444	12.2854	10.5167	11.5203	12.2969	12.1459	10.2948	11.2202	0.00896187	0.000268158	protein_coding	Legume lectin family protein
AT3G16660	15.2611	15.2651	13.8753	13.7183	14.9677	15.0337	13.7593	13.4039	0.0102788	0.000511508	protein_coding	Pollen Ole e 1 allergen and extensin family protein
AT3G16670	12.5301	11.9417	8.26652	7.79955	11.902	11.7528	9.62339	8.43977	8.70441e-05	1.9531e-09	protein_coding	Pollen Ole e 1 allergen and extensin family protein
AT3G18715	6.1244	6.23315	5.83218	5.49655	6.19403	6.64935	5.76609	5.6954	0.586673	5.36321e-11	protein_coding	inflorescence deficient in abscission (IDA)-like 4
AT3G19620	7.89003	8.04871	6.9361	7.44524	7.92215	8.07559	7.49286	7.15616	1.19488e-09	8.29573e-21	protein_coding	Glycosyl hydrolase family protein
AT3G19710	14.9527	14.8007	13.7671	13.4532	14.8359	14.6811	13.4878	13.0959	1.65251e-06	9.05046e-06	protein_coding	branched-chain aminotransferase4
AT3G21950	7.14431	6.78099	5.64507	5.36996	7.22543	6.77886	6.02976	5.39732	0.202886	1.13837e-06	protein_coding	S-adenosyl-L-methionine-dependent methyltransferases superfamily protein
AT3G22142	9.921	9.65326	7.84284	7.09369	9.5153	9.24207	8.45844	7.41384	0.0166147	0.000730423	protein_coding	Bifunctional inhibitor/lipid-transfer protein/seed storage 2S albumin superfamily protein
AT3G23840	8.96787	9.4363	7.8207	8.3382	8.69607	9.10826	7.83169	8.55152	0.0981083	2.59704e-08	protein_coding	HXXXD-type acyl-transferase family protein
AT3G24140	9.79613	9.77112	9.10027	8.81358	9.93683	9.94478	9.48917	9.36732	0.203825	4.83834e-05	protein_coding	basic helix-loop-helix (bHLH) DNA-binding superfamily protein
AT3G28080	9.88737	10.2999	8.77953	8.26757	10.2143	10.4613	9.66084	8.92446	0.465092	0.00214577	protein_coding	nodulin MtN21 /EamA-like transporter family protein
AT3G30720	7.85117	7.52592	6.38658	5.73092	8.62726	7.87782	7.27606	6.83697	0.203914	0.040483	protein_coding	qua-quine starch
AT3G42628	9.43654	10.0724	9.0941	9.21813	9.61051	10.1513	9.36965	9.30897	0.638168	0.000887676	protein_coding	phosphoenolpyruvate carboxylase-related / PEP carboxylase-related
AT3G42806	10.8861	10.2488	9.61563	9.08535	11.5499	11.2255	10.6144	9.84866	4.25655e-07	0.00170043	transposable_element_gene	transposable element gene
AT3G44042	8.69427	8.43595	7.37167	7.33579	8.41173	8.19057	8.08594	7.88772	0.167353	0.0299549	transposable_element_gene	transposable element gene
AT3G46500	8.09607	7.77365	6.56657	6.42525	8.07114	7.82317	5.83372	5.90792	0.489195	0.024748	protein_coding	2-oxoglutarate (2OG) and Fe(II)-dependent oxygenase superfamily protein
AT3G46900	11.5056	10.9687	10.1556	9.74164	11.2627	11.0349	10.2129	9.84683	0.028931	0.00647799	protein_coding	copper transporter 2
AT3G48310	10.2883	11.4132	8.1857	8.90419	10.872	11.524	9.80254	10.7588	0.0260083	4.67891e-09	protein_coding	cytochrome P450, family 71, subfamily A, polypeptide 22
AT3G50480	10.8125	10.989	8.46009	8.80083	11.6608	11.412	9.35311	9.01869	1.87186e-05	0.0141908	protein_coding	homolog of RPW8 4
AT3G60970	8.26827	8.28068	7.29976	7.26739	8.77507	8.83082	7.59305	7.47243	0.00656917	0.00709388	protein_coding	multidrug resistance-associated protein 15
AT3G62820	12.2364	12.4712	11.1116	10.9582	12.5419	12.6512	11.743	11.3082	0.00736932	8.02619e-06	protein_coding	Plant invertase/pectin methylesterase inhibitor superfamily protein
AT4G00780	8.92759	8.84057	8.05449	7.99398	9.23214	9.02333	8.06017	7.88179	0.0236356	0.00664865	protein_coding	TRAF-like family protein
AT4G01440	7.81498	7.71303	7.06606	6.63899	7.4496	7.66406	7.18115	7.12454	1.932e-06	0.0110848	protein_coding	nodulin MtN21 /EamA-like transporter family protein
AT4G02420	10.5402	10.8214	9.52703	9.71312	10.543	10.8991	9.85137	10.1171	2.36647e-10	0.000322303	protein_coding	Concanavalin A-like lectin protein kinase family protein
AT4G03060	9.39749	8.57975	6.19092	5.52691	9.48997	8.32565	6.20145	5.0921	0.000123368	0.00457513	pseudogene	AOP2 (ALKENYL HYDROXALKYL PRODUCING 2); oxidoreductase, acting on paired donors, with incorporation or reduction of molecular oxygen, 2-oxoglutarate as one donor, and incorporation of one atom each of oxygen into both donors
AT4G04223	11.4758	11.4883	9.21173	9.03478	10.2958	10.5805	9.38882	9.8461	0.533678	0.0156066	other_rna	other RNA
AT4G08570	6.79947	7.65139	6.09099	5.64312	6.51829	7.75962	6.03906	5.93855	0.49247	0.011465	protein_coding	Heavy metal transport/detoxification superfamily protein
AT4G10120	10.8716	11.4073	10.0467	10.2918	11.3372	11.6179	10.5919	10.6959	2.40584e-10	0.00367587	protein_coding	Sucrose-phosphate synthase family protein
AT4G13290	7.43297	8.05189	5.65024	5.77562	8.4412	8.55042	5.93003	5.66742	0.00865468	0.0478414	protein_coding	cytochrome P450, family 71, subfamily A, polypeptide 19
AT4G14040	12.4671	12.5002	11.1925	11.2526	12.2447	12.4621	11.1067	11.1144	2.18025e-05	0.0150472	protein_coding	selenium-binding protein 2
AT4G14390	7.77094	7.02926	7.9302	7.0344	8.6872	8.61463	7.88416	7.08391	0.711022	0.0437376	protein_coding	Ankyrin repeat family protein
AT4G16370	10.9871	11.3354	10.0792	10.4636	10.9388	11.2596	10.5435	10.8102	0.00389019	0.0179095	protein_coding	oligopeptide transporter
AT4G16920	6.53824	6.96252	5.4775	5.44319	6.785	7.17684	5.72186	5.88635	0.623409	0.00582925	protein_coding	Disease resistance protein (TIR-NBS-LRR class) family
AT4G17680	8.82195	8.75345	8.23418	7.76755	9.20218	9.31808	8.44624	7.83873	2.57172e-06	0.0285124	protein_coding	SBP (S-ribonuclease binding protein) family protein
AT4G17905	9.2869	9.51393	8.67943	8.53616	9.24427	9.63174	8.60458	8.89389	5.12175e-05	0.00722503	protein_coding	RING/U-box superfamily protein
AT4G18050	8.39771	8.4458	7.48869	7.82734	8.36657	8.71521	7.67597	8.15068	0.140988	0.000741389	protein_coding	P-glycoprotein 9
AT4G19690	8.09981	8.92783	4.74578	4.92806	7.74266	6.89403	5.11704	5.07161	1.80117e-08	4.35966e-07	protein_coding	iron-regulated transporter 1
AT4G19810	11.8554	11.9564	10.3973	11.1383	11.6467	12.0366	10.5656	10.9645	1.04072e-06	0.00389686	protein_coding	Glycosyl hydrolase family protein with chitinase insertion domain
AT4G19820	8.08232	7.7258	7.05968	7.2187	8.09535	8.08494	7.28832	7.25865	6.43952e-07	6.14926e-10	protein_coding	Glycosyl hydrolase family protein with chitinase insertion domain
AT4G21630	7.9978	9.01468	6.52623	7.28679	8.24385	8.73609	8.04764	8.24407	1.26216e-11	0.0364731	protein_coding	Subtilase family protein
AT4G21650	7.46722	8.49729	6.18876	6.53897	7.72667	8.12863	7.56475	7.74119	0.000104532	2.61047e-05	protein_coding	Subtilase family protein
AT4G21760	8.10243	8.64819	7.43558	6.73199	7.96287	8.64602	7.84791	7.19999	2.56969e-06	3.75628e-07	protein_coding	beta-glucosidase 47
AT4G22490	12.4546	12.8591	10.501	10.2242	12.5596	12.3712	10.6252	10.2913	0.0247883	0.00902567	protein_coding	Bifunctional inhibitor/lipid-transfer protein/seed storage 2S albumin superfamily protein
AT4G22505	9.26748	9.83092	4.7773	4.69837	9.31468	9.00838	4.90052	4.90257	0.759616	0.0275231	protein_coding	Bifunctional inhibitor/lipid-transfer protein/seed storage 2S albumin superfamily protein
AT4G22513	11.6109	12.2162	4.90496	4.54682	11.7939	11.5716	4.65502	4.84375	0.279044	0.000236999	protein_coding	Bifunctional inhibitor/lipid-transfer protein/seed storage 2S albumin superfamily protein
AT4G23290	6.77571	6.80671	5.81733	5.54095	6.87321	6.95188	6.28372	5.83878	0.556222	0.00813492	protein_coding	cysteine-rich RLK (RECEPTOR-like protein kinase) 21
AT4G23870	10.9352	11.2809	9.5829	9.27517	10.8577	11.1419	9.17305	9.22152	1.28021e-07	3.52052e-05	protein_coding
AT4G24140	10.223	9.60816	8.59405	8.06442	10.2314	9.7885	8.91163	8.80579	8.65239e-06	0.0490868	protein_coding	alpha/beta-Hydrolases superfamily protein
AT4G25260	8.07926	7.85701	7.47564	7.17243	8.19344	7.97172	7.59434	7.65653	4.56676e-09	0.000493363	protein_coding	Plant invertase/pectin methylesterase inhibitor superfamily protein
AT4G29920	9.37897	9.76943	9.16316	8.7803	9.23629	9.98374	9.34128	9.33401	0.0348373	1.1584e-05	protein_coding	Double Clp-N motif-containing P-loop nucleoside triphosphate hydrolases superfamily protein
AT4G32340	8.12885	8.78081	7.24904	7.69211	8.34432	8.77157	8.10474	8.41305	1.84856e-07	0.00519557	protein_coding	Tetratricopeptide repeat (TPR)-like superfamily protein
AT4G33720	9.69956	11.0994	8.28288	9.77818	11.3365	12.3221	10.0329	9.08962	0.000186335	0.00615992	protein_coding	CAP (Cysteine-rich secretory proteins, Antigen 5, and Pathogenesis-related 1 protein) superfamily protein
AT4G35810	7.7685	7.91446	5.01782	4.64745	7.86982	7.52787	5.14229	4.79106	0.00201106	0.0276969	protein_coding	2-oxoglutarate (2OG) and Fe(II)-dependent oxygenase superfamily protein
AT5G03545	10.994	10.3959	8.63333	8.0304	10.7439	10.5032	8.9027	8.63455	0.000578278	0.0118235	protein_coding
AT5G03710	8.91506	9.82322	7.79869	7.9731	8.71942	8.94552	8.60634	8.69243	0.00381981	0.000378929	protein_coding
AT5G05250	12.3827	12.5624	11.7818	11.3406	12.2483	11.9945	12.0458	12.2468	0.00649449	0.0240183	protein_coding
AT5G05365	9.26733	10.059	8.66164	9.06125	9.60023	9.95093	9.26011	9.17233	3.50848e-09	1.74931e-05	protein_coding	Heavy metal transport/detoxification superfamily protein
AT5G05630	9.75079	9.50347	8.99026	8.6628	9.58947	9.35806	9.18832	8.96266	6.08578e-06	0.000413266	protein_coding	Amino acid permease family protein
AT5G06720	8.02509	8.18859	7.48689	7.37419	8.21794	8.39854	8.26665	7.61324	0.00795465	0.000339532	protein_coding	peroxidase 2
AT5G07690	11.2926	10.9496	7.30023	6.78225	11.1756	10.8212	7.48241	6.45347	0.000306437	2.06508e-05	protein_coding	myb domain protein 29
AT5G09480	12.4885	11.4628	11.0217	10.2085	12.1081	11.5056	10.8213	10.8068	0.177614	0.000494268	protein_coding	hydroxyproline-rich glycoprotein family protein
AT5G09710	5.87113	5.54594	6.03226	5.35737	6.3159	6.35811	5.76499	5.34041	5.80439e-08	0.0042667	protein_coding	Magnesium transporter CorA-like family protein
AT5G10170	12.57	12.4337	12.0969	11.741	12.6068	12.5358	11.8559	11.5284	0.0208439	2.6026e-08	protein_coding	myo-inositol-1-phosphate synthase 3
AT5G11190	6.53149	6.92572	5.45603	5.49633	6.17383	6.38519	5.63523	5.82655	0.00669411	2.51756e-08	protein_coding	Integrase-type DNA-binding superfamily protein
AT5G14200	16.4832	16.3207	15.6629	15.119	16.4119	16.1863	15.2728	14.7508	0.00137281	2.29804e-06	protein_coding	isopropylmalate dehydrogenase 1
AT5G14545	8.58093	8.54802	7.34068	7.13703	8.39679	8.23561	7.47137	7.20716	0.000284691	8.07857e-09	mirna	MIR398B; miRNA
AT5G14565	12.1175	12.2996	9.83476	10.2661	11.8982	11.9317	10.0428	9.94797	2.13792e-09	0.000230624	mirna	MIR398C; miRNA
AT5G14750	9.86891	10.354	10.0239	9.21651	10.0016	10.2136	9.87722	9.39022	2.32919e-07	0.000183011	protein_coding	myb domain protein 66
AT5G14860	6.07639	5.75349	5.23744	5.05746	5.70298	5.57986	5.16261	4.9324	1.53673e-05	0.0318205	protein_coding	UDP-Glycosyltransferase superfamily protein
AT5G18404	7.08812	6.6541	6.13046	5.72767	6.68897	6.45202	6.51783	6.31574	0.000243932	0.00049584	protein_coding
AT5G18430	10.0636	9.71839	8.97034	8.52541	9.78392	9.38491	9.57867	9.05367	0.0090391	0.00766542	protein_coding	GDSL-like Lipase/Acylhydrolase superfamily protein
AT5G19580	7.10356	6.97682	5.92216	5.89114	7.35707	7.13575	6.48328	6.48716	1.14602e-07	0.0476605	protein_coding	glyoxal oxidase-related protein
AT5G19730	11.6348	11.9628	10.6978	11.0473	11.3208	11.8144	10.8382	11.0706	1.41727e-07	0.000289879	protein_coding	Pectin lyase-like superfamily protein
AT5G20010	8.60906	9.11128	7.91671	8.08673	8.56364	9.15673	7.69524	8.23799	4.53426e-09	9.18545e-08	protein_coding	RAS-related nuclear protein-1
AT5G23010	13.8729	13.7137	12.3203	11.9149	14.0394	13.7677	12.2263	11.376	0.00934596	0.00356937	protein_coding	methylthioalkylmalate synthase 1
AT5G33370	6.71046	6.82876	4.91399	5.00338	6.35249	6.14739	5.00596	4.74515	0.00084649	1.91053e-05	protein_coding	GDSL-like Lipase/Acylhydrolase superfamily protein
AT5G35796	8.5495	8.34271	7.02171	6.64813	8.40514	8.37169	7.36136	7.28926	0.34041	3.78006e-07	pseudogene
AT5G35870	6.34587	6.3017	5.70465	5.41886	6.32566	6.04572	5.40546	5.07949	0.57644	1.19919e-06	protein_coding
AT5G37450	5.90401	5.70336	5.21221	4.85022	5.80686	5.54112	5.15753	5.12646	0.155037	2.85015e-05	protein_coding	Leucine-rich repeat protein kinase family protein
AT5G37530	9.78789	9.52312	9.70583	9.3644	9.77651	10.1251	9.54945	9.00693	6.06128e-05	7.47235e-06	protein_coding	NAD(P)-binding Rossmann-fold superfamily protein
AT5G38990	11.7115	11.5484	10.6387	10.2899	11.8424	11.6404	11.1749	10.985	0.00302045	0.000245091	protein_coding	Malectin/receptor-like protein kinase family protein
AT5G39000	10.2476	10.0673	9.18652	8.85153	10.2868	10.0371	9.6902	9.56966	0.00012399	4.68196e-07	protein_coding	Malectin/receptor-like protein kinase family protein
AT5G39030	6.67999	6.65616	5.29726	5.64522	6.6893	6.48129	5.47675	5.73327	3.35037e-09	0.00140495	protein_coding	Protein kinase superfamily protein
AT5G39110	8.6584	7.86842	5.67144	5.48916	8.10971	8.15671	6.15634	5.75926	0.000292807	3.1733e-07	protein_coding	RmlC-like cupins superfamily protein
AT5G39130	11.6878	10.7832	6.6489	6.20799	11.4867	11.4453	6.77072	6.50478	0.995674	9.90322e-07	protein_coding	RmlC-like cupins superfamily protein
AT5G39150	7.88595	7.09171	5.15192	5.01562	7.10302	7.14707	4.85506	4.7001	6.84313e-07	1.20036e-05	protein_coding	RmlC-like cupins superfamily protein
AT5G39160	11.8527	10.9421	6.85103	6.49983	11.81	11.7296	6.96707	6.5104	2.09455e-07	2.5871e-06	protein_coding	RmlC-like cupins superfamily protein
AT5G39180	8.8396	7.89661	5.2988	4.99977	7.59273	7.90241	5.07743	5.12776	0.586998	7.91846e-08	protein_coding	RmlC-like cupins superfamily protein
AT5G39190	11.8952	11.0687	6.87095	6.34982	11.7461	11.6888	6.97062	6.58987	0.0106192	2.40258e-08	protein_coding	germin-like protein 2
AT5G39493	5.93485	5.74249	5.05645	4.88021	5.97857	6.02278	5.43641	5.17453	6.79211e-10	4.20239e-06	protein_coding	Plant self-incompatibility protein S1 family
AT5G40060	7.53776	7.77483	6.73336	6.87355	7.52399	7.60645	7.14442	7.05663	0.884827	1.78182e-10	protein_coding	Disease resistance protein (NBS-LRR class) family
AT5G40630	9.47781	9.40068	9.58484	8.75036	9.43201	9.80395	9.37883	9.22852	0.0434047	3.40835e-09	protein_coding	Ubiquitin-like superfamily protein
AT5G42840	7.96561	8.01623	7.91722	7.34701	8.21796	8.47719	7.72801	7.36087	1.14756e-07	2.52596e-05	protein_coding	Cysteine/Histidine-rich C1 domain family protein
AT5G43285	6.54711	7.33622	5.50721	5.27868	6.12243	7.19777	5.66205	5.41452	1.24094e-07	0.0343191	protein_coding	Putative membrane lipoprotein
AT5G43290	9.37033	10.5483	8.41187	6.81131	8.93213	10.6245	8.63602	7.5993	0.0110944	4.5298e-05	protein_coding	WRKY DNA-binding protein 49
AT5G43513	6.13985	6.38901	5.40439	5.03164	6.02499	6.99675	5.59595	5.3708	4.72302e-06	6.75626e-08	protein_coding	Putative membrane lipoprotein
AT5G43518	6.15103	6.33262	5.52818	5.33469	6.09554	6.35799	5.67473	5.65764	0.609261	5.17203e-09	protein_coding	Putative membrane lipoprotein
AT5G44578	10.899	10.3353	8.98247	7.98521	11.3694	10.7717	9.81657	9.21525	0.407746	0.000604914	protein_coding
AT5G44582	8.72046	9.08577	7.12681	7.53848	8.34166	8.81899	7.20756	7.91466	0.226451	1.12393e-06	protein_coding
AT5G45070	9.07115	9.71584	7.53848	8.3103	8.97109	10.0274	7.25688	8.25106	0.44095	9.84644e-05	protein_coding	phloem protein 2-A8
AT5G45080	7.46246	6.97695	5.49973	5.56681	7.622	7.23261	5.56442	5.4391	0.000844395	0.0346507	protein_coding	phloem protein 2-A6
AT5G50800	9.42687	9.72216	6.94306	6.60092	10.146	10.1153	6.78558	6.59913	0.000218613	0.00268781	protein_coding	Nodulin MtN3 family protein
AT5G52070	10.8983	10.5881	9.01317	8.79487	10.9545	10.838	9.89347	9.96553	0.0170113	0.000730909	protein_coding	Agenet domain-containing protein
AT5G52710	6.2362	6.58561	6.11211	5.46643	6.47129	6.63788	6.64573	5.63882	7.00044e-05	1.51659e-05	protein_coding	Copper transport protein family
AT5G54020	8.70287	8.81496	8.12734	8.16345	8.84814	9.08186	7.95664	7.88391	2.08973e-07	3.87901e-06	protein_coding	Cysteine/Histidine-rich C1 domain family protein
AT5G57070	10.6984	11.1088	10.2133	10.3535	10.6859	10.8724	10.032	10.4034	4.46209e-06	9.53255e-06	protein_coding	hydroxyproline-rich glycoprotein family protein
AT5G58310	9.94808	10.119	7.28735	7.35187	9.27167	9.64565	7.91631	8.29695	0.0564144	2.51289e-06	protein_coding	methyl esterase 18
AT5G67280	11.9528	12.1043	12.0533	11.2981	12.0466	12.2883	12.2366	11.0893	0.537086	3.46145e-06	protein_coding	receptor-like kinase
1) Genes with a significant change in expression were selected using the following criteria: an expression log_2 ratio > 0.5 and a controlled p-value
(FDR; Benjamini and Hochberg, 1995) from t-test analysis < 0.05 in WT, hda19-3, quad, and quint between normal and salinity stress conditions.

## Sheet: S7
Supplemental Table S7. Genes classified into Group 5 in Figure 1C
AGI code	Col-0	Col-0 NaCl	hda19	hda19 NaCl	quad	quad NaCl	quint	quint NaCl	one-way ANOVA	BH FDR	function	annotation
AT1G01110	8.63919	8.31962	9.33188	8.94779	8.49827	8.2471	8.96013	8.70931	1.8045e-07	0.00109572	protein_coding	IQ-domain 18
AT1G02380	8.72438	8.14722	8.84198	9.14361	8.82594	7.91195	8.49	9.29259	0.00400569	6.69845e-07	protein_coding
AT1G02580	5.97657	5.62636	6.48454	6.54857	5.49035	5.33946	6.19897	5.95224	6.03153e-05	0.0004722	protein_coding	SET domain-containing protein
AT1G02610	7.54057	7.9297	8.36838	9.19928	7.84408	7.96341	8.62421	9.63375	1.25985e-19	0.00598179	protein_coding	RING/FYVE/PHD zinc finger superfamily protein
AT1G02670	7.12345	6.71126	7.99766	8.00118	7.09295	6.47806	7.60166	8.14059	0.321677	7.75696e-05	protein_coding	P-loop containing nucleoside triphosphate hydrolases superfamily protein
AT1G02770	8.00902	7.95651	10.8065	10.9935	7.15396	7.07618	10.2057	10.4864	0.339957	4.15103e-10	protein_coding	Protein of unknown function (DUF626)
AT1G02860	10.9783	10.467	11.5374	11.4569	10.9301	10.5287	11.3409	11.3222	9.91203e-05	0.000282542	protein_coding	SPX (SYG1/Pho81/XPR1) domain-containing protein
AT1G03106	5.87399	5.88804	9.46566	8.79544	5.67173	5.85322	8.0282	8.59102	0.000657728	5.93726e-07	protein_coding
AT1G03210	11.1519	10.8439	11.5449	11.1739	10.9941	10.411	10.9763	10.6004	0.00986531	0.000172452	protein_coding	Phenazine biosynthesis PhzC/PhzF protein
AT1G03230	9.52294	9.31768	10.4483	10.2667	9.59768	9.47241	9.97422	10.0459	6.49125e-12	3.55701e-06	protein_coding	Eukaryotic aspartyl protease family protein
AT1G03445	6.30962	6.06696	8.45787	8.2451	5.52754	6.6606	7.06666	6.95142	0.0628791	8.92338e-08	protein_coding	Serine/threonine protein phosphatase family protein
AT1G03457	7.28716	6.64867	7.83413	7.45645	7.23936	6.56423	7.67451	7.16596	0.32554	2.93326e-05	protein_coding	RNA-binding (RRM/RBD/RNP motifs) family protein
AT1G03470	9.77746	9.63697	10.256	10.1205	9.31964	9.22864	9.95922	10.1836	0.564183	0.00532697	protein_coding	Kinase interacting (KIP1-like) family protein
AT1G03580	5.95895	5.46804	6.235	6.2686	5.32704	5.12308	5.80326	5.32564	0.0102684	0.0139906	pseudogene
AT1G03880	5.18516	5.14258	7.58614	7.94959	5.62241	5.76654	7.0732	8.505	8.4811e-08	1.18055e-07	protein_coding	cruciferin 2
AT1G03890	4.78639	4.84483	6.24044	6.00299	4.96665	4.93017	5.89021	6.87335	0.107841	3.16171e-06	protein_coding	RmlC-like cupins superfamily protein
AT1G04370	6.28565	5.63141	6.32333	6.25146	6.67432	5.75776	6.10157	6.16652	0.0165594	5.06893e-06	protein_coding	Ethylene-responsive element binding factor 14
AT1G04660	6.82331	6.03071	7.8064	6.77957	6.43075	5.76186	7.49912	6.80958	4.22328e-10	1.21953e-11	protein_coding	glycine-rich protein
AT1G04880	6.66071	6.29053	7.4939	7.11308	6.34225	6.07195	7.36971	7.22698	0.0533979	0.00317822	protein_coding	HMG (high mobility group) box protein with ARID/BRIGHT DNA-binding domain
AT1G05135	15.2522	14.9082	15.7567	15.8092	15.335	15.2784	16.1411	16.0678	0.00174719	7.92853e-05	pseudogene
AT1G05240	9.516	8.74537	10.9317	10.7428	10.774	10.2069	10.9432	10.189	0.000261444	4.85466e-09	protein_coding	Peroxidase superfamily protein
AT1G05420	7.48125	7.33322	8.14273	8.63982	7.63686	7.51184	8.55492	8.55662	2.18151e-08	1.41588e-08	protein_coding	ovate family protein 12
AT1G05660	8.47833	7.98891	8.90874	9.01442	8.11708	7.98423	8.29372	8.67134	0.00236459	0.001588	protein_coding	Pectin lyase-like superfamily protein
AT1G05835	9.87956	9.81635	10.6408	10.2508	9.84745	9.72972	10.7509	10.5833	0.0479531	8.97877e-09	protein_coding	PHD finger protein
AT1G06090	10.8476	9.86391	11.835	11.4541	10.9975	10.2106	11.5977	11.2856	1.10259e-08	0.000674674	protein_coding	Fatty acid desaturase family protein
AT1G06100	7.38666	6.95096	7.90551	7.48185	7.41355	6.79763	7.77844	7.52876	0.298273	2.73566e-08	protein_coding	Fatty acid desaturase family protein
AT1G06420	7.45935	7.11827	7.93502	7.4791	7.12355	6.84381	7.3804	6.98814	0.000226626	0.000686544	protein_coding
AT1G06925	5.7989	5.48428	5.91057	5.70065	5.45052	5.19845	6.43472	5.89748	1.10115e-11	1.40931e-06	protein_coding
AT1G07050	6.89751	6.44818	7.38166	6.99524	6.3092	6.06924	7.04147	6.85927	0.320565	0.000796253	protein_coding	CCT motif family protein
AT1G07175	7.95647	7.05692	8.17275	8.56569	7.88543	7.22759	7.68244	8.14481	0.247383	0.000529804	protein_coding
AT1G07610	15.9687	15.7092	16.1655	16.5503	15.7429	15.321	16.0205	16.4718	4.38106e-05	0.00017215	protein_coding	metallothionein 1C
AT1G07690	5.2159	5.29079	6.49922	5.97614	5.41113	5.2573	5.69513	5.5385	1.08959e-09	0.0377692	protein_coding
AT1G08670	9.90127	8.90782	10.0632	10.0756	9.91829	9.28059	10.113	9.65651	0.559458	8.46986e-05	protein_coding	ENTH/VHS family protein
AT1G08830	9.88409	9.79605	11.0199	11.0178	10.0225	9.92391	11.0054	11.2248	0.117421	3.29718e-07	protein_coding	copper/zinc superoxide dismutase 1
AT1G08900	7.83991	7.92741	8.15868	8.0947	7.2992	7.05924	8.21318	8.20163	4.84311e-07	7.10645e-06	protein_coding	Major facilitator superfamily protein
AT1G09176	6.03922	5.50036	6.49735	6.5512	6.19199	5.91265	6.52195	6.10924	1.41092e-08	1.50095e-05	protein_coding
AT1G09380	7.39693	7.0438	8.8843	8.5257	7.87754	7.4227	7.55323	7.8137	2.96979e-08	0.00245034	protein_coding	nodulin MtN21 /EamA-like transporter family protein
AT1G09480	8.49635	7.95195	10.1591	9.85248	7.90981	7.23297	9.48021	9.09081	0.000113532	8.12951e-05	protein_coding	NAD(P)-binding Rossmann-fold superfamily protein
AT1G10000	7.11502	6.83874	8.18824	7.10923	6.73558	6.32	7.68733	7.12477	1.31778e-07	3.06907e-09	protein_coding	Ribonuclease H-like superfamily protein
AT1G10140	10.7126	10.9048	11.8972	11.8785	10.9606	10.7435	11.6432	12.1604	3.47209e-07	0.000130034	protein_coding	Uncharacterised conserved protein UCP031279
AT1G10450	8.87124	8.52106	9.27463	9.33049	9.20375	8.97358	9.55001	9.46702	5.09579e-07	3.82073e-07	protein_coding	SIN3-like 6
AT1G10540	6.42427	6.49923	7.48385	7.14155	6.29046	6.11896	7.27031	6.9486	0.000930756	0.00569739	protein_coding	nucleobase-ascorbate transporter 8
AT1G10690	9.29779	9.23882	9.81006	10.2006	9.14114	9.3253	9.79508	10.463	1.58556e-06	1.74733e-09	protein_coding
AT1G10970	8.83434	8.38157	9.24246	8.93387	8.63534	8.08296	9.12567	8.64784	0.468847	0.000642658	protein_coding	zinc transporter 4 precursor
AT1G11530	11.0635	10.2226	11.8503	11.3333	10.493	9.47746	11.7204	11.5401	1.35292e-09	2.69897e-06	protein_coding	C-terminal cysteine residue is changed to a serine 1
AT1G11580	14.5223	14.1973	15.1906	14.5409	14.5384	14.1322	14.7128	14.347	6.42172e-07	0.00394087	protein_coding	methylesterase PCR A
AT1G12040	8.63475	8.03819	9.87426	9.64283	9.36506	8.92472	9.77349	9.0357	0.848621	0.00106433	protein_coding	leucine-rich repeat/extensin 1
AT1G12130	5.69646	5.50097	6.08148	6.4446	5.31747	5.52495	5.86415	5.8727	0.0036069	0.0117729	protein_coding	Flavin-binding monooxygenase family protein
AT1G12150	6.77204	6.17155	7.37838	7.32467	7.17187	6.79236	7.50464	7.12476	4.75866e-06	0.0348452	protein_coding	Plant protein of unknown function (DUF827)
AT1G12780	11.8734	11.6336	12.8475	13.03	12.5936	12.3109	13.1994	13.3762	0.0254957	8.41995e-06	protein_coding	UDP-D-glucose/UDP-D-galactose 4-epimerase 1
AT1G12805	8.66964	7.74243	11.1423	8.89266	9.08639	7.59185	10.2498	8.86309	0.00283153	0.00779916	protein_coding	nucleotide binding
AT1G13080	10.8718	10.7456	11.8372	11.8125	11.1127	11.2892	11.9215	11.7831	0.228526	2.93475e-05	protein_coding	cytochrome P450, family 71, subfamily B, polypeptide 2
AT1G13590	10.3215	9.58251	10.4707	10.4956	10.1328	10.1282	10.1739	10.5958	1.09836e-10	1.36233e-05	protein_coding	phytosulfokine 1 precursor
AT1G13700	9.25017	8.46591	10.2047	10.1747	8.88207	7.78588	10.6622	10.3936	0.00322921	0.000140344	protein_coding	6-phosphogluconolactonase 1
AT1G14260	6.39803	5.61485	7.34029	6.35061	6.28283	5.74523	6.90419	5.99418	3.10727e-10	4.30406e-05	protein_coding	RING/FYVE/PHD zinc finger superfamily protein
AT1G14642	6.07431	5.98971	6.55648	6.88171	6.11533	5.78014	6.84915	6.62838	1.48634e-10	0.00101856	protein_coding
AT1G14687	9.90963	9.52763	10.0829	9.57074	9.40113	9.04139	9.95385	9.52175	1.08524e-06	3.93635e-10	protein_coding	homeobox protein 32
AT1G14760	6.03362	5.92677	7.26778	6.68469	6.27184	5.93742	7.64563	6.95365	2.28201e-07	2.79297e-05	protein_coding	KNOX Arabidopsis thaliana meinox
AT1G14890	12.3068	12.5742	12.8074	13.3292	12.3564	12.618	13.1037	13.5033	0.00025864	5.34259e-06	protein_coding	Plant invertase/pectin methylesterase inhibitor superfamily protein
AT1G14930	5.09828	5.22961	8.58517	8.64989	5.78665	5.99737	7.08011	7.51337	4.74299e-09	0.000561016	protein_coding	Polyketide cyclase/dehydrase and lipid transport superfamily protein
AT1G14940	5.08734	4.96541	6.17707	6.4826	4.95913	5.1253	5.69942	6.67008	0.00101113	5.37616e-09	protein_coding	Polyketide cyclase/dehydrase and lipid transport superfamily protein
AT1G14950	4.96143	4.89072	7.24198	8.38233	5.0548	5.18383	6.50163	8.15575	3.87236e-06	6.29712e-07	protein_coding	Polyketide cyclase/dehydrase and lipid transport superfamily protein
AT1G15310	10.2524	9.85771	10.8621	10.4024	9.90222	9.35052	10.4312	9.98546	3.53656e-05	0.000696596	protein_coding	signal recognition particle 54 kDa subunit
AT1G15320	5.21682	4.9838	5.99531	6.11933	5.16658	5.10887	5.50781	5.73526	6.94555e-07	4.54851e-05	protein_coding
AT1G15790	8.77417	8.57614	9.46841	9.58654	8.78292	8.42928	9.15463	8.97624	0.248307	0.000498795	protein_coding
AT1G15825	7.02475	7.15532	7.89847	7.83918	6.9885	6.83947	7.81301	7.87482	2.79052e-06	0.0019643	protein_coding	hydroxyproline-rich glycoprotein family protein
AT1G17020	9.30509	9.39485	9.64531	10.1234	9.05642	8.9634	10.0969	10.58	0.000231509	0.000622529	protein_coding	senescence-related gene 1
AT1G17810	4.82111	5.79829	7.68985	9.47731	5.50607	5.88392	7.4808	8.65863	2.51199e-07	6.58513e-10	protein_coding	beta-tonoplast intrinsic protein
AT1G17990	7.01464	6.92116	7.01782	7.01301	6.78663	6.24953	7.03189	7.34099	5.32666e-09	0.00276302	protein_coding	FMN-linked oxidoreductases superfamily protein
AT1G19610	7.00762	7.64732	8.03747	9.29496	7.43566	7.47923	8.78001	9.83308	0.144329	0.00657505	protein_coding	Arabidopsis defensin-like protein
AT1G20900	12.0939	11.5358	12.8018	12.4257	12.0606	11.6326	12.4769	12.3611	0.712283	5.05159e-06	protein_coding	Predicted AT-hook DNA-binding family protein
AT1G21060	9.17236	8.78591	9.65882	9.85126	8.92941	8.63471	9.62914	9.82765	0.78512	0.00719074	protein_coding	Protein of unknown function, DUF547
AT1G21340	7.5026	7.65836	8.22192	8.8859	7.88527	7.93886	8.48831	8.99874	1.55216e-06	0.00104147	protein_coding	Dof-type zinc finger DNA-binding family protein
AT1G21525	9.01197	8.59042	8.01368	8.78001	8.60542	8.26229	8.42137	9.09244	2.72714e-05	2.11421e-06	pseudogene
AT1G22400	11.6171	10.5629	11.1329	11.2431	11.5825	10.4012	11.2121	11.4194	9.90832e-07	1.49482e-09	protein_coding	UDP-Glycosyltransferase superfamily protein
AT1G22980	8.6588	8.10403	10.1979	9.74163	8.46155	8.08993	9.74482	9.20601	7.59839e-07	0.00290201	protein_coding
AT1G23010	8.11432	8.37094	8.62495	9.2764	8.25717	8.38657	8.60013	9.12227	9.49559e-06	7.07157e-05	protein_coding	Cupredoxin superfamily protein
AT1G23052	6.27778	6.20592	7.77193	7.4875	6.51203	6.26591	8.20163	8.23541	1.70408e-06	4.18749e-10	other_rna
AT1G23965	6.58098	6.4181	7.11444	7.34287	6.50831	5.90467	7.43302	7.20167	2.27033e-12	0.0138123	protein_coding
AT1G24070	7.64519	7.64406	8.10973	8.73968	7.78363	7.67416	8.0207	8.61069	3.78145e-08	5.25474e-08	protein_coding	cellulose synthase-like A10
AT1G25230	13.3154	12.2585	13.7792	13.4669	13.4442	12.2817	14.1551	13.6339	1.84197e-05	0.0384793	protein_coding	Calcineurin-like metallo-phosphoesterase superfamily protein
AT1G25450	10.9052	10.5287	10.1928	11.3534	10.842	10.5572	10.3551	11.2579	2.80514e-08	3.97817e-07	protein_coding	3-ketoacyl-CoA synthase 5
AT1G25480	7.98929	7.30401	8.41118	7.84142	7.70303	7.37595	8.2862	7.83433	0.00019878	0.0260337	protein_coding	Aluminium activated malate transporter family protein
AT1G26590	6.07286	5.71316	6.49519	6.27329	5.51791	5.42583	6.23331	5.86494	0.0014111	0.00775243	protein_coding	C2H2-like zinc finger protein
AT1G26797	4.94277	4.85751	5.76221	4.83932	4.78563	4.70211	4.90182	4.77644	9.37058e-09	1.30201e-08	protein_coding	Plant self-incompatibility protein S1 family
AT1G27045	5.15869	5.19123	6.02801	5.65214	5.29816	5.05639	6.20523	5.95253	0.748537	4.74545e-07	protein_coding	Homeobox-leucine zipper protein family
AT1G28290	7.64393	7.06208	8.11899	7.3984	7.55252	6.88801	7.72498	7.26102	2.46664e-07	0.0050596	protein_coding	arabinogalactan protein 31
AT1G28330	8.96853	9.69268	10.8425	11.9629	9.06706	9.7204	10.7191	12.1788	0.0432563	1.19228e-07	protein_coding	dormancy-associated protein-like 1
AT1G28650	4.78307	5.07219	6.1043	5.95578	4.92857	4.67868	5.45716	5.98581	7.26614e-06	1.6111e-06	protein_coding	GDSL-like Lipase/Acylhydrolase superfamily protein
AT1G29090	10.2404	9.55155	13.9531	13.7611	9.56034	8.62445	9.96256	10.5731	0.906577	4.34967e-10	protein_coding	Cysteine proteinases superfamily protein
AT1G29670	14.6372	14.6458	15.2883	15.7358	14.3707	14.4341	15.4163	15.9032	9.94274e-08	5.04826e-05	protein_coding	GDSL-like Lipase/Acylhydrolase superfamily protein
AT1G30040	8.7855	8.70776	9.36665	10.1822	8.87431	8.95047	9.64501	10.4211	1.14239e-07	1.33891e-08	protein_coding	gibberellin 2-oxidase
AT1G30160	6.06962	5.76922	7.21601	7.28999	6.41163	6.4436	8.1798	7.91252	0.471112	2.37468e-07	protein_coding	Protein of unknown function (DUF295)
AT1G30560	5.66838	5.5077	6.44336	6.26767	6.03432	5.88223	6.70383	6.02571	3.99392e-05	0.000691326	protein_coding	Major facilitator superfamily protein
AT1G30650	9.0044	8.93553	9.77279	10.022	9.28942	9.25352	10.0199	9.85834	0.0338273	2.75387e-06	protein_coding	WRKY DNA-binding protein 14
AT1G30660	7.98579	7.97851	8.91087	8.8928	8.19723	8.17008	9.32864	9.27785	2.21484e-08	1.38769e-06	protein_coding	nucleic acid binding;nucleic acid binding
AT1G30750	10.3642	9.06263	10.5315	10.2376	9.89189	9.54773	10.2344	9.92365	3.30575e-07	8.48212e-05	protein_coding
AT1G30870	9.31993	8.94331	10.3864	10.7907	10.0106	10.0825	10.453	10.5125	5.46223e-09	8.64639e-09	protein_coding	Peroxidase superfamily protein
AT1G30940	6.4831	6.43096	7.36044	7.49215	6.74419	6.78244	7.44192	7.53974	0.838163	1.5235e-07	pseudogene
AT1G31710	11.0502	10.6588	11.8088	11.6296	11.5428	11.1568	12.3994	12.0528	0.000234351	1.50871e-05	protein_coding	Copper amine oxidase family protein
AT1G32190	7.95907	7.61324	8.5794	8.09694	7.9178	7.4496	8.32333	8.32153	0.000339516	0.0116323	protein_coding	alpha/beta-Hydrolases superfamily protein
AT1G32763	5.65406	5.3901	7.01833	6.33012	6.16375	5.87294	7.53377	6.65056	0.00988702	7.17251e-06	protein_coding	Cysteine-rich protein
AT1G33500	6.88264	6.51805	7.33074	6.62896	6.84989	6.26827	7.11261	6.56247	0.000855391	8.20898e-10	protein_coding
AT1G33790	11.8609	10.9136	13.2631	12.6065	11.7758	10.8714	13.3356	12.6813	0.178878	0.000526037	protein_coding	jacalin lectin family protein
AT1G34510	7.55703	8.26154	9.43217	10.1641	9.00234	9.13506	9.48812	9.32053	0.00344267	6.04997e-08	protein_coding	Peroxidase superfamily protein
AT1G34760	7.35665	6.91344	8.78868	8.27631	7.28748	6.9065	8.4144	7.81294	0.334993	2.87365e-05	protein_coding	general regulatory factor 11
AT1G42680	7.28598	6.99344	7.53185	7.88365	7.86378	7.41549	8.01762	8.07455	3.37335e-11	1.57339e-06	protein_coding	P-loop containing nucleoside triphosphate hydrolases superfamily protein
AT1G48605	9.1756	8.89841	9.75239	9.50024	9.03329	8.71266	9.23774	9.02038	4.06004e-09	0.000247397	protein_coding	Flavoprotein
AT1G49405	6.50826	6.42482	7.32526	7.12925	6.75904	6.65546	7.7372	7.44807	1.72351e-05	1.19956e-09	protein_coding	Uncharacterised protein family (UPF0497)
AT1G49475	7.36115	7.4108	8.27168	8.12226	7.0752	7.33047	7.82967	7.88735	0.000491181	6.59766e-10	protein_coding	AP2/B3-like transcriptional factor family protein
AT1G50400	8.32057	7.40217	9.07864	8.04717	7.946	7.03739	8.81432	7.80136	6.99426e-07	3.82223e-05	protein_coding	Eukaryotic porin family protein
AT1G51035	6.59622	6.05436	6.91476	6.82619	7.33605	6.86337	7.54344	7.53741	0.00546472	0.0123046	protein_coding
AT1G51470	11.1977	10.2279	11.8425	11.9647	11.4707	10.7793	12.0232	12.0455	0.000108827	3.65065e-09	protein_coding	beta glucosidase 35
AT1G51860	8.93256	8.38328	9.70752	9.28075	9.18399	8.74438	9.26919	8.84611	0.0160091	1.71615e-10	protein_coding	Leucine-rich repeat protein kinase family protein
AT1G52050	11.8363	11.4085	12.8114	12.3852	11.9824	11.4295	12.431	11.9578	0.00482389	7.62116e-06	protein_coding	Mannose-binding lectin superfamily protein
AT1G52060	12.2946	11.8254	13.09	12.6426	12.2245	11.7742	12.7671	12.3385	0.628646	2.09541e-10	protein_coding	Mannose-binding lectin superfamily protein
AT1G52070	14.3701	14.0895	15.1498	14.9035	14.2999	14.1374	15.0514	14.7188	1.04921e-06	0.00663224	protein_coding	Mannose-binding lectin superfamily protein
AT1G52100	12.3376	12.5297	13.2023	13.1526	12.3373	12.5901	13.3662	13.5286	5.2105e-05	8.68961e-12	protein_coding	Mannose-binding lectin superfamily protein
AT1G52330	8.70044	7.77489	8.89114	8.84359	8.62324	7.8806	8.73457	8.36134	2.05326e-08	0.0151167	protein_coding	Late embryogenesis abundant (LEA) hydroxyproline-rich glycoprotein family
AT1G52410	8.53951	8.3679	9.5672	10.0679	8.92016	8.44982	9.52267	9.94098	0.882756	0.000545155	protein_coding	TSK-associating protein 1
AT1G53035	9.54371	9.19696	10.6856	10.6016	9.56621	9.31108	10.8678	10.5311	1.05441e-08	3.09361e-05	protein_coding
AT1G53540	7.52548	8.46285	7.60752	8.09346	6.54664	7.01103	9.30587	7.7423	0.0420165	4.09063e-05	protein_coding	HSP20-like chaperones superfamily protein
AT1G54010	13.7941	13.6746	14.8566	14.325	13.8639	13.7398	14.4746	14.0703	0.611326	4.44291e-09	protein_coding	GDSL-like Lipase/Acylhydrolase superfamily protein
AT1G54030	12.3726	12.1039	13.3013	12.9972	12.7068	12.4554	13.2567	12.8357	0.00462371	6.47939e-07	protein_coding	GDSL-like Lipase/Acylhydrolase superfamily protein
AT1G54860	5.09828	5.0883	6.04723	7.50535	5.22408	5.20697	6.44042	7.26393	0.0170937	1.83074e-06	protein_coding	Glycoprotein membrane precursor GPI-anchored
AT1G55850	13.2951	13.2189	13.8867	14.0948	13.667	13.7235	14.0883	14.4321	8.61014e-10	0.000571158	protein_coding	cellulose synthase like E1
AT1G56580	15.7732	15.9761	16.414	16.9128	15.7843	16.0074	16.4361	16.8928	0.633221	1.35198e-06	protein_coding	Protein of unknown function, DUF538
AT1G56720	10.4328	9.89068	10.8253	10.3301	10.2182	9.60329	10.7951	10.3398	3.84599e-05	2.21302e-07	protein_coding	Protein kinase superfamily protein
AT1G57800	5.9481	5.68843	6.81057	6.49531	5.00118	4.84011	5.63007	5.80493	2.17905e-15	0.00258279	protein_coding	zinc finger (C3HC4-type RING finger) family protein
AT1G58180	8.56083	8.56397	8.92615	9.71984	8.67769	8.48914	9.15859	10.0908	0.111456	1.82027e-06	protein_coding	beta carbonic anhydrase 6
AT1G60050	5.73407	5.565	6.80902	6.73888	6.42492	6.44801	6.85224	6.50094	5.57439e-09	1.62058e-08	protein_coding	Nodulin MtN21 /EamA-like transporter family protein
AT1G60610	11.1982	11.3879	11.6616	12.3037	11.4107	11.4314	11.6601	12.3622	0.00690723	7.9091e-06	protein_coding	SBP (S-ribonuclease binding protein) family protein
AT1G60960	12.0023	11.0078	12.8748	12.2923	11.8577	10.7208	12.7952	11.9525	0.0694167	0.00011943	protein_coding	iron regulated transporter 3
AT1G60970	6.10378	5.763	6.86442	6.56115	5.80944	5.48329	6.07696	5.99333	0.0501288	2.17623e-12	protein_coding	SNARE-like superfamily protein
AT1G61080	5.52553	5.34719	6.99917	6.63516	6.09384	5.95806	6.9211	6.40879	0.184054	1.46059e-06	protein_coding	Hydroxyproline-rich glycoprotein family protein
AT1G61170	10.0612	9.73645	10.2979	10.0701	9.77151	9.22447	10.192	9.91999	0.0928114	0.0174721	protein_coding
AT1G61255	10.1733	10.5151	11.4365	12.5974	10.4486	10.6462	11.663	12.7938	0.171415	1.96373e-10	protein_coding
AT1G61590	7.50241	6.54633	8.01399	7.56818	7.40187	6.52724	7.80217	7.33661	0.000687308	2.15533e-07	protein_coding	Protein kinase superfamily protein
AT1G62370	11.2598	11.1791	11.7223	12.2657	11.285	11.2182	11.8561	12.0689	3.97562e-09	4.67219e-08	protein_coding	RING/U-box superfamily protein
AT1G62480	13.6155	13.6017	14.7541	14.8729	13.6368	13.5143	14.7321	14.9925	1.93459e-06	1.58411e-07	protein_coding	Vacuolar calcium-binding protein-related
AT1G62510	11.0085	11.0938	12.7177	13.4468	10.9406	10.8011	13.0431	13.4142	0.62571	7.4536e-09	protein_coding	Bifunctional inhibitor/lipid-transfer protein/seed storage 2S albumin superfamily protein
AT1G62530	5.59283	5.23622	6.78893	6.852	5.22671	5.09356	6.25053	6.42475	0.0243564	0.00326056	protein_coding	Plant protein of unknown function (DUF863)
AT1G62980	8.82657	8.68125	9.82701	10.3644	9.81807	9.89635	10.0573	10.0156	0.0077953	1.68256e-12	protein_coding	expansin A18
AT1G64160	7.31434	6.34978	7.80287	8.29301	7.92164	6.5795	8.04541	7.58106	1.0588e-07	0.00173328	protein_coding	Disease resistance-responsive (dirigent-like protein) family protein
AT1G64240	5.84472	5.63557	6.91933	6.31627	5.39965	5.36651	7.00503	6.31734	0.0446787	1.16571e-08	transposable_element_gene	transposable element gene
AT1G65340	5.3113	5.25924	6.47746	6.44511	5.78259	5.5129	6.64011	6.49729	1.45782e-10	0.0166849	protein_coding	cytochrome P450, family 96, subfamily A, polypeptide 3
AT1G65390	11.7943	11.5508	10.8927	11.1111	11.7087	10.6305	11.5138	11.7364	2.81107e-10	0.000956962	protein_coding	phloem protein 2 A5
AT1G65730	9.15741	9.46122	10.492	11.0604	9.26561	9.54994	10.1295	10.6615	0.0333373	0.000224126	protein_coding	YELLOW STRIPE like 7
AT1G66200	12.4649	11.9969	13.267	13.0132	12.7602	12.304	13.0068	12.7463	7.82662e-07	4.24658e-06	protein_coding	glutamine synthase clone F11
AT1G66270	13.7264	13.4157	14.7448	14.5715	14.0824	13.743	14.55	14.3018	1.3793e-07	0.0469815	protein_coding	Glycosyl hydrolase superfamily protein
AT1G66390	7.53996	8.06584	9.12247	10.8416	7.88421	8.24687	9.48663	10.8606	9.7066e-09	1.16566e-05	protein_coding	myb domain protein 90
AT1G67100	7.54491	6.75761	10.3138	9.87157	7.90704	6.98507	9.21977	9.92947	0.119678	2.88748e-09	protein_coding	LOB domain-containing protein 40
AT1G67105	11.3533	10.9855	13.0024	12.9913	12.4747	12.172	13.7348	13.5396	0.0892161	4.15481e-08	other_rna	other RNA
AT1G67265	5.75549	5.69383	6.17643	6.0361	6.52397	5.93391	7.41778	6.67892	0.669491	2.55211e-09	protein_coding	ROTUNDIFOLIA like 21
AT1G67460	6.04502	5.93199	6.76129	6.32386	5.60933	5.70963	6.24095	6.11573	0.0743584	0.000788819	protein_coding	Minichromosome maintenance (MCM2/3/5) family protein
AT1G67650	7.77945	7.4789	8.82264	8.8237	8.12308	7.86227	9.15076	9.18708	0.00634732	0.000206724	protein_coding	SRP72 RNA-binding domain
AT1G67750	11.8757	12.0833	13.0828	12.6451	12.0091	12.3951	12.9878	12.6803	0.044214	0.00397849	protein_coding	Pectate lyase family protein
AT1G68150	9.96462	9.12849	10.181	9.95739	9.60124	9.22172	9.6723	9.7541	3.51076e-08	2.24425e-09	protein_coding	WRKY DNA-binding protein 9
AT1G68290	7.29088	7.23375	7.96074	8.87573	7.82472	7.6292	8.49058	9.11265	3.84235e-05	9.09712e-05	protein_coding	endonuclease 2
AT1G68640	8.31961	8.15411	9.3701	8.83552	8.40103	8.10498	9.24799	8.8318	3.19825e-06	0.000153415	protein_coding	bZIP transcription factor family protein
AT1G68862	9.20144	8.41844	8.97174	8.81115	9.09419	7.87243	9.17648	8.41472	0.0132195	0.0242396	protein_coding
AT1G68870	7.63885	7.07493	7.53194	7.42965	7.46999	6.61962	7.49539	7.32471	0.604649	1.83465e-06	protein_coding	SOB five-like 2
AT1G69160	9.54424	9.10637	9.76269	9.29522	9.23438	8.46171	9.56041	9.76903	0.0324668	0.013195	protein_coding
AT1G69710	6.36965	6.40163	7.17121	7.34592	7.05512	7.02812	7.5478	7.53394	4.01156e-06	1.45837e-07	protein_coding	Regulator of chromosome condensation (RCC1) family with FYVE zinc finger domain
AT1G70090	12.3505	11.3261	11.7349	11.8669	12.371	11.0947	11.8822	11.8378	0.0154623	0.000260931	protein_coding	glucosyl transferase family 8
AT1G70210	9.20329	9.29942	9.75111	9.03187	9.03159	9.42428	10.0378	9.16451	0.58056	2.87094e-08	protein_coding	CYCLIN D1;1
AT1G70220	5.69031	5.61336	6.51653	5.83607	5.26033	5.29296	5.65983	5.23592	6.99241e-08	3.35164e-07	protein_coding	RNA-processing, Lsm domain
AT1G70290	8.91502	9.27005	9.96091	10.738	9.35033	9.48894	9.88306	11.2385	2.85086e-10	1.5709e-06	protein_coding	trehalose-6-phosphatase synthase S8
AT1G70460	8.98855	8.721	9.91956	10.0576	9.21733	9.0151	9.71657	9.45672	0.22301	7.74003e-05	protein_coding	root hair specific 10
AT1G70581	5.42321	5.64913	6.14149	6.22255	5.41487	5.58449	5.92261	6.41675	6.02897e-07	3.08746e-06	other_rna	other RNA
AT1G70880	8.99912	8.59197	10.5375	10.0616	8.89512	8.56828	9.58956	9.10547	0.000484611	1.24115e-08	protein_coding	Polyketide cyclase/dehydrase and lipid transport superfamily protein
AT1G70885	8.76552	8.16977	9.45434	9.10145	9.64742	9.17887	9.75605	9.43444	0.181952	1.1164e-07	pseudogene
AT1G71280	7.57671	6.93537	8.15839	7.61771	6.58525	5.95631	7.47105	6.90452	0.373283	2.00192e-05	protein_coding	DEA(D/H)-box RNA helicase family protein
AT1G71380	6.5134	6.2266	7.28176	8.05769	6.37403	5.74832	7.52757	8.26878	0.184505	8.66426e-07	protein_coding	cellulase 3
AT1G71695	13.6131	13.5617	14.2868	14.1067	13.3108	13.1493	14.057	13.993	1.04923e-09	0.00116066	protein_coding	Peroxidase superfamily protein
AT1G71740	10.4257	9.12067	10.7148	10.6859	9.7791	9.46225	10.4735	10.3124	0.00113015	0.000364928	protein_coding
AT1G71770	5.55927	5.50739	6.7078	6.55617	5.09175	5.15746	5.88219	5.75295	3.09499e-10	0.00265277	protein_coding	poly(A)-binding protein 5
AT1G72070	9.74461	9.7596	11.5088	11.1219	9.78707	9.39301	11.7753	11.677	0.745186	0.0305854	protein_coding	Chaperone DnaJ-domain superfamily protein
AT1G72150	13.8139	12.9085	14.1415	13.9838	13.9287	12.8089	14.3178	13.956	0.170085	0.00474956	protein_coding	PATELLIN 1
AT1G72970	13.8944	13.4735	14.2797	14.0558	13.7237	13.2456	14.1891	13.8926	3.20266e-06	2.76631e-06	protein_coding	Glucose-methanol-choline (GMC) oxidoreductase family protein
AT1G73000	5.62185	5.35962	6.47109	5.94055	5.73237	5.40596	5.95649	5.4095	0.459429	0.0051844	protein_coding	PYR1-like 3
AT1G73120	13.4433	13.7213	14.7782	15.2802	13.9594	14.1319	14.997	15.5675	0.00223312	0.000315238	protein_coding
AT1G73210	5.45132	5.46858	6.15613	6.30231	5.26695	5.37644	5.97604	6.35934	3.40066e-05	3.13216e-10	protein_coding	Protein of unknown function (DUF789)
AT1G73300	9.02019	8.11624	9.74097	8.81561	8.89112	7.95668	9.29525	8.20021	2.46674e-06	0.00355268	protein_coding	serine carboxypeptidase-like 2
AT1G73580	9.06456	7.84628	9.63244	9.4565	9.0366	8.44546	9.44733	8.84144	0.419355	4.20783e-07	protein_coding	Calcium-dependent lipid-binding (CaLB domain) family protein
AT1G73700	5.68949	5.85743	6.42284	6.34238	5.51168	5.40686	5.93832	5.86689	0.00614632	0.000624472	protein_coding	MATE efflux family protein
AT1G73880	9.79878	9.37934	10.1662	10.352	10.0915	9.66287	10.4193	10.5108	5.32533e-10	6.70215e-07	protein_coding	UDP-glucosyl transferase 89B1
AT1G74870	8.69826	8.11277	8.98483	8.77756	9.21297	9.25475	9.68752	9.53529	0.126426	9.46858e-08	protein_coding	RING/U-box superfamily protein
AT1G74890	7.74379	8.09712	8.16021	8.27877	7.71695	7.0849	8.46467	8.12158	0.725808	9.7146e-08	protein_coding	response regulator 15
AT1G74929	6.78391	6.83486	7.59455	7.31994	6.51962	6.54818	7.32861	7.36252	1.33514e-09	1.67686e-15	protein_coding
AT1G74940	12.1577	11.3956	13.1924	11.9735	12.2915	11.5049	12.8557	11.9061	1.16817e-12	0.0230686	protein_coding	Protein of unknown function (DUF581)
AT1G75190	11.3855	10.7359	12.1887	11.1227	11.3989	10.5154	11.8406	11.0295	0.0862524	0.000325313	protein_coding
AT1G75240	10.2582	9.74216	11.0169	10.5273	10.2924	9.8138	10.9154	10.3831	0.335226	1.30474e-06	protein_coding	homeobox protein 33
AT1G76500	9.95489	9.70228	10.6806	10.7492	9.98566	10.0673	10.5996	10.6773	5.01291e-09	0.00102831	protein_coding	Predicted AT-hook DNA-binding family protein
AT1G76520	11.6994	10.8033	11.8398	11.5686	11.6022	10.7368	11.8559	11.6246	0.0381649	0.00568257	protein_coding	Auxin efflux carrier family protein
AT1G76930	10.5631	10.1403	10.8494	10.3006	10.176	9.75128	10.5982	10.1495	0.342198	1.21446e-10	protein_coding	extensin 4
AT1G77210	9.11898	8.32932	9.36843	8.98769	8.36306	7.2523	9.20682	9.00931	0.00452419	4.62241e-14	protein_coding	sugar transporter 14
AT1G77380	8.42975	8.20303	8.93421	9.10511	8.30783	8.43221	9.06924	9.23226	0.000113081	2.74223e-10	protein_coding	amino acid permease 3
AT1G78290	8.77323	8.79649	9.43671	9.96594	8.86142	8.90905	9.75189	9.97705	1.48701e-07	8.47906e-05	protein_coding	Protein kinase superfamily protein
AT1G78476	7.08373	6.79198	7.81572	7.5391	7.03242	7.0474	8.44307	8.06004	0.000131576	3.28687e-08	protein_coding
AT1G78780	8.65087	8.672	9.03484	9.21728	8.96713	8.63099	9.69357	9.72197	0.920533	6.39809e-06	protein_coding	pathogenesis-related family protein
AT1G79700	5.92562	5.90323	6.40769	7.26215	6.06511	6.06918	6.73504	7.54169	4.16615e-10	0.0249676	protein_coding	Integrase-type DNA-binding superfamily protein
AT1G79860	6.48396	5.67352	7.00019	6.84862	6.58758	6.21732	7.03414	6.61886	0.225105	0.000180073	protein_coding	RHO guanyl-nucleotide exchange factor 12
AT1G80440	12.3695	12.0881	13.7543	13.8774	12.3557	11.6767	13.7679	14.3911	0.00372815	1.33965e-06	protein_coding	Galactose oxidase/kelch repeat superfamily protein
AT2G01372	5.08977	5.13212	5.38404	5.72239	5.50639	5.36081	5.90732	6.10667	0.503297	0.000282514	pseudogene
AT2G01530	12.9521	12.4086	13.9398	13.7628	13.1582	12.5083	13.77	13.556	2.20225e-05	0.000521454	protein_coding	MLP-like protein 329
AT2G01818	6.76048	6.45687	7.7148	7.36043	6.56308	6.48842	7.34981	7.36048	1.01179e-10	7.94868e-12	protein_coding	PLATZ transcription factor family protein
AT2G01850	13.9672	13.4177	13.7441	14.0635	14.0366	13.3347	14.068	14.3578	0.00263537	6.7924e-05	protein_coding	endoxyloglucan transferase A3
AT2G01890	9.42733	8.73846	10.2776	10.1781	9.63405	9.01382	10.8034	10.4844	0.0114245	7.48251e-06	protein_coding	purple acid phosphatase 8
AT2G01940	9.02006	8.63181	10.0323	10.0496	8.95072	8.49554	10.2653	9.98718	0.335422	0.000455211	protein_coding	C2H2-like zinc finger protein
AT2G02100	15.7386	15.6011	16.317	16.4036	15.5671	15.2878	16.1884	16.1825	0.0352399	5.92216e-07	protein_coding	low-molecular-weight cysteine-rich 69
AT2G02540	8.16552	8.01808	8.77477	8.66127	7.98215	7.81133	8.81411	8.77891	9.68213e-14	0.00331186	protein_coding	homeobox protein 21
AT2G04110	8.36468	8.65032	9.05213	9.57594	8.56364	8.83434	9.17906	9.8486	0.00375021	0.00861884	pseudogene
AT2G04115	5.26899	5.25237	6.30833	6.2937	5.48347	5.48896	6.33227	6.32394	0.00167397	0.000277776	protein_coding	Plant self-incompatibility protein S1 family
AT2G10970	4.67319	4.76503	4.67687	4.72968	4.72085	4.93712	6.34377	4.80602	1.09096e-14	1.84953e-10	protein_coding	Plant invertase/pectin methylesterase inhibitor superfamily protein
AT2G11310	7.40223	7.16877	8.62045	8.55518	8.02068	7.56538	8.48018	7.7188	3.13551e-07	1.83869e-09	transposable_element_gene	transposable element gene
AT2G14870	5.81832	5.50826	6.05588	6.19294	6.67696	6.20345	6.7138	6.53737	0.168385	3.77676e-05	protein_coding	RNA-binding (RRM/RBD/RNP motifs) family protein
AT2G15090	11.4396	10.5899	12.7209	12.4235	10.989	10.1197	12.6057	12.2188	7.16339e-06	0.0239955	protein_coding	3-ketoacyl-CoA synthase 8
AT2G15890	9.77346	9.07489	11.2048	10.5795	9.75164	8.87796	10.8041	10.9991	0.529476	2.9424e-07	protein_coding	maternal effect embryo arrest 14
AT2G16790	9.77026	9.81041	10.1893	10.7789	9.95368	9.81868	10.2237	10.6384	0.0418827	0.000319873	protein_coding	P-loop containing nucleoside triphosphate hydrolases superfamily protein
AT2G17230	12.4494	10.8976	12.2918	11.9118	12.5148	10.1868	12.3894	11.5163	3.49014e-07	0.0232781	protein_coding	EXORDIUM like 5
AT2G17880	10.8094	10.1024	11.9814	11.2849	10.689	9.96561	12.091	11.4903	2.267e-06	1.39549e-10	protein_coding	Chaperone DnaJ-domain superfamily protein
AT2G18350	8.44894	8.4214	9.43651	9.35653	8.34379	8.50017	9.45124	9.58112	0.00402967	0.000415894	protein_coding	homeobox protein 24
AT2G18440	11.3815	10.8258	11.7528	11.5008	11.361	10.8617	11.8706	11.8953	0.421132	7.93675e-09	other_rna
AT2G18590	4.79225	4.83955	5.25756	6.03916	5.03668	5.03815	5.76999	6.38496	6.38641e-07	5.10655e-09	protein_coding	Major facilitator superfamily protein
AT2G18600	10.2697	10.225	10.7961	11.0358	10.781	10.5282	11.0967	11.2406	4.36187e-07	0.000684859	protein_coding	Ubiquitin-conjugating enzyme family protein
AT2G20670	12.4846	12.4755	13.4879	13.3425	12.6274	12.6921	13.5168	13.7206	0.210168	7.37397e-06	protein_coding	Protein of unknown function (DUF506)
AT2G20835	10.488	9.94069	11.5282	11.3463	10.3976	10.0102	11.4874	11.662	0.241042	2.28737e-06	protein_coding
AT2G23150	7.68242	7.71683	8.18849	8.7211	8.07529	8.09949	8.64035	8.82116	5.52096e-05	0.0244122	protein_coding	natural resistance-associated macrophage protein 3
AT2G23910	9.66762	9.19699	10.0126	10.5806	9.50237	9.28301	9.47238	9.98394	0.000264239	0.0373834	protein_coding	NAD(P)-binding Rossmann-fold superfamily protein
AT2G24040	9.85121	9.28813	10.127	9.87779	9.67665	8.90563	9.84594	9.36796	0.536155	3.03114e-07	protein_coding	Low temperature and salt responsive protein family
AT2G24220	8.49573	8.06377	8.89452	8.69971	8.41942	7.87546	8.89294	8.43344	0.00180189	0.0301314	protein_coding	purine permease 5
AT2G24680	6.19591	5.72691	6.92373	6.29575	5.93868	5.69894	6.75699	6.10298	0.0131471	0.00207088	protein_coding	transcriptional factor B3 family protein
AT2G24800	7.67582	8.12792	8.95121	9.13008	7.46196	8.12167	9.40259	9.15897	3.01418e-10	9.7133e-09	protein_coding	Peroxidase superfamily protein
AT2G24980	9.32242	8.7508	10.7083	10.7611	9.98488	9.43431	10.5665	10.0267	1.70517e-06	2.28433e-08	protein_coding	Proline-rich extensin-like family protein
AT2G25150	5.94361	6.59594	7.08652	6.42914	6.40254	6.47046	7.22503	6.33251	0.748517	0.0101633	protein_coding	HXXXD-type acyl-transferase family protein
AT2G25160	9.54646	10.1682	10.7323	10.7386	10.1201	10.1879	10.8025	10.5205	6.75385e-07	0.0127043	protein_coding	cytochrome P450, family 82, subfamily F, polypeptide 1
AT2G25240	8.48141	8.0827	10.4167	10.3091	9.29547	8.89075	9.91171	9.53066	1.60643e-09	1.00259e-09	protein_coding	Serine protease inhibitor (SERPIN) family protein
AT2G25890	5.05472	5.12839	6.63072	8.3027	5.78827	5.74955	7.06405	7.30189	0.57385	1.95712e-13	protein_coding	Oleosin family protein
AT2G26410	5.55447	5.25544	6.26899	6.00066	5.90841	5.54863	6.01981	5.82957	0.240763	0.000239421	protein_coding	IQ-domain 4
AT2G26560	7.93111	8.55988	7.10659	8.12403	8.25199	7.27031	7.70722	8.94835	0.245416	0.00421802	protein_coding	phospholipase A 2A
AT2G26740	12.8368	12.8207	13.1153	13.6014	13.4695	13.3426	13.7346	14.0375	1.88554e-06	4.03644e-07	protein_coding	soluble epoxide hydrolase
AT2G26750	10.3552	10.2722	10.6036	11.0562	10.9125	10.7146	11.1652	11.6142	2.354e-13	0.000124831	protein_coding	alpha/beta-Hydrolases superfamily protein
AT2G27370	11.4302	10.37	11.4536	11.6616	11.0935	10.7423	11.2221	11.1763	4.42966e-07	1.53592e-10	protein_coding	Uncharacterised protein family (UPF0497)
AT2G27380	7.64995	7.12847	8.58896	8.41713	7.65281	7.47007	8.29507	9.13336	1.23531e-06	8.83129e-06	protein_coding	extensin proline-rich 1
AT2G27535	10.4058	10.0078	11.1183	10.4004	10.1462	9.87279	11.1029	10.3302	8.06225e-06	8.8671e-09	protein_coding	ribosomal protein L10A family protein
AT2G28120	9.64004	8.90081	10.3279	10.5701	9.73739	8.73506	10.7503	10.9257	1.82712e-08	3.46007e-08	protein_coding	Major facilitator superfamily protein
AT2G28140	9.45343	9.53597	9.33085	10.1084	9.90901	8.8394	9.66566	10.2098	5.22113e-07	0.0329075	protein_coding	Protein of unknown function (DUF1635)
AT2G28190	13.8986	13.8562	14.9418	14.8683	13.5445	13.4541	14.7363	14.7256	1.32707e-07	0.0277188	protein_coding	copper/zinc superoxide dismutase 2
AT2G28200	9.89431	9.18497	10.5641	10.2733	10.3472	9.88581	10.9321	10.8396	0.0454377	1.14134e-09	protein_coding	C2H2-type zinc finger family protein
AT2G28670	12.1954	11.3738	12.6018	12.3545	11.8028	11.3432	12.2108	12.0624	2.02069e-06	0.0368154	protein_coding	Disease resistance-responsive (dirigent-like protein) family protein
AT2G28700	5.65805	5.43438	6.47862	6.36348	5.31233	5.21122	6.00001	5.53786	0.22663	0.0119579	protein_coding	AGAMOUS-like 46
AT2G29620	7.31733	7.3524	7.90917	8.67637	7.74491	7.79093	8.02346	8.28502	2.43227e-06	1.29814e-07	protein_coding
AT2G30432	6.76055	6.34852	7.24709	6.80636	6.49374	6.29547	7.76216	7.37275	1.6959e-15	5.21073e-07	protein_coding	Homeodomain-like superfamily protein
AT2G30942	9.0886	8.84125	9.63261	9.27123	8.62293	8.11174	9.3783	8.94279	1.08225e-11	9.53847e-07	protein_coding	Protein of unknown function (DUF3317)
AT2G31560	8.87838	8.93196	9.26052	9.83299	8.69281	8.77089	9.28244	9.84676	3.6669e-07	0.0281748	protein_coding	Protein of unknown function (DUF1685)
AT2G31760	4.67849	4.82182	4.68702	4.74497	4.63043	4.80442	6.11	4.89583	0.717616	2.09265e-08	protein_coding	RING/U-box superfamily protein
AT2G32460	5.85528	5.85799	8.6283	8.21707	5.99773	6.0392	6.51148	6.99859	1.02296e-05	5.43618e-06	protein_coding	myb domain protein 101
AT2G32550	12.054	11.9729	12.4581	12.3376	11.0457	10.8239	11.9474	12.0995	0.0145431	0.000201455	protein_coding	Cell differentiation, Rcd1-like protein
AT2G32940	8.43648	7.92616	8.89943	8.29373	7.82566	7.40151	8.35691	7.74786	0.592082	0.0118389	protein_coding	Argonaute family protein
AT2G34340	8.52556	8.38467	9.4301	9.75369	8.65771	8.1756	9.61906	9.88368	6.15696e-06	0.00927596	protein_coding	Protein of unknown function, DUF584
AT2G34655	6.57528	5.89759	7.62865	7.0325	7.53939	7.31582	9.33702	8.80461	0.19531	4.76863e-09	protein_coding
AT2G34960	9.06899	8.85046	10.0354	9.33015	8.76013	8.74574	9.67975	8.97889	1.97156e-05	0.000148937	protein_coding	cationic amino acid transporter 5
AT2G35140	8.31789	7.93433	9.29562	9.02804	7.63955	7.22997	8.96752	8.62006	1.09328e-05	2.52033e-07	protein_coding	DCD (Development and Cell Death) domain protein
AT2G35310	8.95206	8.8775	9.54479	9.33346	8.58238	8.323	9.02627	8.97206	1.43265e-05	1.20711e-05	protein_coding	Transcriptional factor B3 family protein
AT2G35550	7.02887	6.9094	8.2187	8.1966	7.39437	7.18016	8.45376	8.39914	2.54945e-07	6.83589e-06	protein_coding	basic pentacysteine 7
AT2G36100	12.0783	10.9072	12.4204	12.2874	11.9682	11.3146	12.1246	11.8356	3.2773e-06	2.43065e-09	protein_coding	Uncharacterised protein family (UPF0497)
AT2G36630	11.5535	11.108	10.7812	11.4489	11.6023	10.6336	11.3519	11.8935	0.0032162	0.000154658	protein_coding	Sulfite exporter TauE/SafE family protein
AT2G36695	7.62897	7.54069	8.47829	8.31223	7.24873	7.40033	7.68408	7.55373	1.10445e-09	0.0061637	protein_coding
AT2G36800	10.3932	10.4214	11.3543	12.2796	10.7248	10.8295	11.0639	12.7462	5.04923e-08	5.991e-06	protein_coding	don-glucosyltransferase 1
AT2G36881	6.66918	6.57682	7.23519	7.45724	7.04099	6.51743	7.55766	7.86223	5.46756e-08	1.92009e-09	protein_coding
AT2G36885	11.4347	11.1831	11.7053	11.5556	10.7531	10.5779	11.397	11.2611	0.0109992	6.15356e-09	protein_coding
AT2G37025	8.3336	7.23143	8.53363	8.04535	8.34136	6.70463	8.77994	7.71339	0.0293688	1.34752e-09	protein_coding	TRF-like 8
AT2G37030	7.15148	5.57871	6.5885	6.5456	6.60843	4.87967	7.30579	6.82537	2.27585e-09	5.09895e-06	protein_coding	SAUR-like auxin-responsive protein family
AT2G37670	6.88715	6.66744	7.42854	7.27913	6.79298	6.4119	7.02419	6.77105	0.000550051	0.000101269	protein_coding	Transducin/WD40 repeat-like superfamily protein
AT2G37740	7.22177	6.56158	8.99537	8.88592	7.57302	6.97164	9.10435	8.93331	9.09481e-05	0.000836544	protein_coding	zinc-finger protein 10
AT2G38210	10.3417	9.79241	11.1234	10.9235	10.8432	10.103	11.6415	11.529	0.000533804	0.00277777	protein_coding	putative PDX1-like protein 4
AT2G39310	9.06656	8.71716	9.5427	9.30903	9.55939	9.22579	9.84135	9.85933	0.0760148	4.82367e-08	protein_coding	jacalin-related lectin 22
AT2G39415	5.48912	4.93264	6.57132	5.97377	5.23249	4.98373	5.62916	5.60059	0.104677	0.0121702	protein_coding	F-box family protein
AT2G39430	12.2017	10.6264	12.3481	12.1795	11.6263	10.9046	11.8979	11.6992	3.13133e-10	1.02977e-06	protein_coding	Disease resistance-responsive (dirigent-like protein) family protein
AT2G39705	9.6617	9.70577	10.6978	10.289	9.83854	9.68951	10.9491	10.4373	0.0966473	8.32177e-07	protein_coding	ROTUNDIFOLIA like 8
AT2G40113	9.86932	8.25124	10.2983	10.1588	9.49241	8.95206	10.1365	9.87122	5.40094e-08	0.000228146	protein_coding	Pollen Ole e 1 allergen and extensin family protein
AT2G40200	7.02115	7.37975	8.03261	8.08523	7.42285	7.48542	8.78949	8.8179	0.580302	1.0508e-05	protein_coding	basic helix-loop-helix (bHLH) DNA-binding superfamily protein
AT2G40220	4.87921	5.04473	7.55234	6.51975	5.07068	5.01293	6.95006	6.53162	3.36826e-08	1.49287e-05	protein_coding	Integrase-type DNA-binding superfamily protein
AT2G40970	10.3849	10.6924	11.5594	11.3617	10.517	10.6846	11.4388	11.3438	0.0648811	1.00603e-10	protein_coding	Homeodomain-like superfamily protein
AT2G41780	10.2254	9.297	10.5819	10.0251	9.88319	9.10111	10.1437	9.42668	5.94825e-07	2.59906e-10	protein_coding
AT2G42570	7.85029	7.2237	8.30014	7.84216	7.55724	7.26708	7.95194	7.69248	0.00203505	3.14812e-05	protein_coding	TRICHOME BIREFRINGENCE-LIKE 39
AT2G42885	4.92305	4.93778	5.9903	5.72796	4.88194	4.96041	5.64393	5.80966	0.00447722	0.000857542	protein_coding	Defensin-like (DEFL) family protein
AT2G42960	7.83744	7.51483	8.26449	7.97438	7.68406	7.25838	8.17324	7.82446	3.40837e-06	0.0248653	protein_coding	Protein kinase superfamily protein
AT2G43660	7.97805	7.10612	9.57855	8.64789	7.83271	6.98712	9.43949	8.5281	2.47588e-09	0.0239307	protein_coding	Carbohydrate-binding X8 domain superfamily protein
AT2G43720	8.49029	8.25561	9.06082	8.748	8.33684	7.85055	8.85182	8.37277	0.00616865	0.0225962	protein_coding	Eukaryotic protein of unknown function (DUF842)
AT2G43860	5.04349	4.82935	5.91615	5.5519	5.02423	5.09075	5.19101	5.49506	0.000162361	3.79998e-07	protein_coding	Pectin lyase-like superfamily protein
AT2G43910	15.0325	14.5862	15.7121	15.0723	14.8047	14.1949	15.4595	15.1208	1.36234e-06	6.72372e-07	protein_coding	HARMLESS TO OZONE LAYER 1
AT2G44690	9.73213	9.17896	10.2376	9.56309	9.11428	8.36568	9.60981	8.91043	4.68548e-05	0.0417378	protein_coding	Arabidopsis RAC-like 9
AT2G45050	11.8048	12.0379	12.433	12.5801	11.5434	11.7289	12.4321	12.4773	0.0541086	0.00137111	protein_coding	GATA transcription factor 2
AT2G45170	11.8878	11.9271	12.2551	12.4842	11.6688	11.9385	12.3688	12.8705	1.35442e-06	0.000140857	protein_coding	AUTOPHAGY 8E
AT2G45190	11.9445	11.806	12.767	12.3303	12.102	11.9194	12.9544	12.6995	7.67389e-09	0.00175098	protein_coding	Plant-specific transcription factor YABBY family protein
AT2G45245	7.91058	7.81958	8.49456	8.38143	7.58123	7.25854	8.21122	8.07211	2.39364e-06	1.96515e-06	other_rna
AT2G46455	6.53917	6.2574	6.96731	6.37733	6.07479	5.80541	6.71755	6.15084	2.17813e-05	2.08907e-08	protein_coding	OxaA/YidC-like membrane insertion protein
AT2G47530	7.12656	6.83206	8.08175	8.52231	7.36052	7.58356	7.87176	8.02878	0.0854495	0.000510209	protein_coding	Pollen Ole e 1 allergen and extensin family protein
AT2G47680	9.61108	9.55386	10.3563	10.1572	9.41433	9.33665	10.1893	10.1203	2.89604e-06	0.000279306	protein_coding	zinc finger (CCCH type) helicase family protein
AT2G47870	6.57913	6.39677	6.56991	7.03587	6.554	5.91541	6.6064	6.79589	0.0771898	1.57711e-05	protein_coding	Thioredoxin superfamily protein
AT3G01010	7.20329	6.63717	7.5909	7.55634	7.91869	7.44695	8.17822	7.64713	2.22473e-07	0.0313708	protein_coding	UDP-glucose/GDP-mannose dehydrogenase family protein
AT3G01329	6.24988	6.02996	6.52574	6.43254	6.15895	5.98501	6.99194	6.3519	7.42802e-08	0.00468179	protein_coding	ECA1-like gametogenesis related family protein
AT3G01490	8.27349	8.20308	8.98825	8.52267	8.3433	7.9466	9.42176	9.07206	0.101827	1.20967e-05	protein_coding	Protein kinase superfamily protein
AT3G01570	6.71751	6.70735	7.64654	8.20247	6.76695	6.81372	7.46659	7.7734	1.64962e-10	1.60303e-07	protein_coding	Oleosin family protein
AT3G02170	11.0683	10.8074	11.321	11.1804	11.3694	10.5654	11.7281	11.0762	0.249793	8.43069e-07	protein_coding	longifolia2
AT3G02240	8.74999	7.72113	9.60531	8.81161	8.8315	7.83358	9.03125	8.49687	1.75837e-09	1.43027e-06	protein_coding
AT3G02500	8.81994	8.58815	9.28213	8.95522	8.83998	8.61478	9.75172	9.19053	0.00478974	0.00804207	protein_coding
AT3G02550	12.552	9.96866	14.719	12.2163	13.0454	10.2602	13.4472	12.1648	0.000703452	0.00204256	protein_coding	LOB domain-containing protein 41
AT3G03500	9.59927	8.60708	10.5032	9.92349	9.63551	8.96815	10.2533	9.90995	3.46144e-09	3.89112e-05	protein_coding	TatD related DNase
AT3G03776	7.01848	6.64614	8.47827	8.29046	6.61601	6.28637	7.84799	7.82715	0.000299052	0.000260309	protein_coding	hydroxyproline-rich glycoprotein family protein
AT3G03870	8.20743	8.17898	8.69489	9.52404	8.35379	8.27675	8.8978	9.69408	3.19729e-08	2.79404e-10	protein_coding
AT3G04060	9.73754	9.64889	10.6843	10.5362	9.59486	9.67011	9.90331	10.255	1.53188e-05	3.38888e-10	protein_coding	NAC domain containing protein 46
AT3G04070	7.33975	8.10392	8.6538	9.49893	7.59528	7.87617	8.4262	9.67341	0.143677	0.0441188	protein_coding	NAC domain containing protein 47
AT3G04485	9.18818	9.25871	9.85102	10.0695	9.13563	8.97228	9.91729	9.98535	0.184688	0.00833201	other_rna	other RNA
AT3G04540	5.47726	5.46527	6.78609	6.17045	6.04686	5.76478	7.27408	6.48673	0.000203243	2.84296e-06	protein_coding	Cysteine-rich protein
AT3G09220	10.6259	10.402	11.8117	11.7696	10.6569	10.7357	10.9646	10.9488	0.000226887	0.00794239	protein_coding	laccase 7
AT3G09270	12.2574	11.8891	13.1249	12.9604	12.1934	12.1039	12.9346	12.8466	0.132092	0.000239964	protein_coding	glutathione S-transferase TAU 8
AT3G09925	10.1062	9.90982	11.3575	11.9153	10.8112	10.7194	11.2352	11.4126	0.446755	5.38783e-09	protein_coding	Pollen Ole e 1 allergen and extensin family protein
AT3G10113	10.8254	10.0134	11.6291	10.902	10.6311	10.1729	11.8483	10.9725	0.746662	1.40619e-06	protein_coding	Homeodomain-like superfamily protein
AT3G10710	8.01787	7.12094	9.09319	9.05403	8.62988	8.32945	9.10487	8.7801	2.05329e-11	2.36381e-12	protein_coding	root hair specific 12
AT3G11040	8.97825	8.45797	9.35514	8.7687	8.71948	8.00374	9.08662	8.48234	0.000309599	0.0217083	protein_coding	Glycosyl hydrolase family 85
AT3G11050	9.17858	9.09039	10.0801	9.9428	9.06832	8.90166	9.45019	9.53301	6.35764e-10	0.0214133	protein_coding	ferritin 2
AT3G11550	10.1509	8.95429	10.3094	10.2512	9.66401	9.16836	9.90966	9.78992	0.253411	1.16039e-08	protein_coding	Uncharacterised protein family (UPF0497)
AT3G12145	6.91919	6.46236	6.64127	7.92332	6.99539	6.0459	6.71878	7.3306	8.1373e-08	1.81988e-08	protein_coding	Leucine-rich repeat (LRR) family protein
AT3G12540	6.89169	6.23561	7.49218	7.54612	7.43517	7.16767	7.73403	7.38147	0.00720779	1.07726e-06	protein_coding	Protein of unknown function, DUF547
AT3G12820	7.64606	7.28484	8.81526	8.68907	7.72826	7.49494	8.90895	8.49182	0.00105384	0.00386566	protein_coding	myb domain protein 10
AT3G13020	6.94223	7.16442	7.77791	7.88859	6.86186	7.04783	7.68733	7.7219	0.0541749	0.00161541	protein_coding	hAT transposon superfamily protein
AT3G13210	7.31234	7.1782	7.57542	7.61534	6.79062	6.5809	7.45041	7.31851	0.828466	1.45198e-05	protein_coding	crooked neck protein, putative / cell cycle protein, putative
AT3G13520	15.8952	15.6415	15.801	16.2994	15.6605	15.1791	15.8007	16.0214	0.00283569	2.91324e-06	protein_coding	arabinogalactan protein 12
AT3G13900	5.45216	5.51184	7.02857	6.26292	5.20623	5.3127	6.87973	6.4157	3.01084e-10	0.00958788	protein_coding	ATPase E1-E2 type family protein / haloacid dehalogenase-like hydrolase family protein
AT3G14280	9.7994	9.65553	10.3343	10.7986	10.0666	9.33006	10.2946	10.2974	2.40679e-05	0.00671905	protein_coding
AT3G14380	5.97049	6.28656	6.65888	6.60303	6.26243	6.20089	7.23002	7.02483	7.38448e-07	0.0202959	protein_coding	Uncharacterised protein family (UPF0497)
AT3G14610	10.4453	10.54	11.1717	11.5003	10.7604	10.86	11.2201	11.4371	1.22192e-06	2.16573e-09	protein_coding	cytochrome P450, family 72, subfamily A, polypeptide 7
AT3G14770	10.4553	10.6208	9.89258	11.0212	10.4624	10.3155	10.4688	10.8325	0.0796251	1.02375e-06	protein_coding	Nodulin MtN3 family protein
AT3G15170	7.10307	6.85161	7.96503	7.85649	7.26062	7.17141	9.24855	8.76219	2.56032e-05	4.20903e-13	protein_coding	NAC (No Apical Meristem) domain transcriptional regulator superfamily protein
AT3G15770	9.93287	9.51169	9.97961	10.1534	10.0218	9.44812	10.5139	10.5051	0.0799557	0.026266	protein_coding
AT3G16360	7.02585	7.95379	7.94064	7.20321	7.46503	7.85201	8.61209	8.02296	0.135192	6.61194e-09	protein_coding	HPT phosphotransmitter 4
AT3G16400	12.6979	12.8995	14.1431	14.6096	13.1088	13.3303	14.1298	14.5465	7.62792e-05	7.09465e-11	protein_coding	nitrile specifier protein 1
AT3G16450	8.16422	8.03819	9.56927	9.41789	8.39258	8.39111	9.35967	9.44631	0.00153875	5.99692e-06	protein_coding	Mannose-binding lectin superfamily protein
AT3G16770	14.5885	14.5684	14.9113	15.0233	15.1019	14.9085	15.5256	15.6414	0.458094	5.41888e-10	protein_coding	ethylene-responsive element binding protein
AT3G16857	9.98054	9.86801	10.5193	10.8547	10.2087	10.0837	10.6294	10.9034	2.05175e-07	6.88576e-06	protein_coding	response regulator 1
AT3G16900	6.26097	5.70208	7.03156	6.53927	6.02845	5.4731	6.41932	6.1774	0.0331585	0.00653652	protein_coding	Protein of unknown function (DUF567)
AT3G16990	8.42966	8.50528	8.94945	9.4455	8.75323	8.61636	8.9652	9.68887	0.000379489	2.99158e-11	protein_coding	Haem oxygenase-like, multi-helical
AT3G17050	12.6312	12.4502	13.7333	13.8607	12.9044	12.9145	14.4747	14.2767	0.0170901	7.09587e-12	transposable_element_gene	transposable element gene
AT3G17280	6.42895	6.22204	6.83686	6.74773	6.58278	6.39522	7.28106	7.13372	0.0107966	6.65274e-07	protein_coding	F-box and associated interaction domains-containing protein
AT3G18160	10.9456	10.6985	11.568	11.2682	10.7422	10.3667	11.3378	11.0251	0.00923755	5.87012e-08	protein_coding	peroxin 3-1
AT3G18880	8.04496	7.56596	8.41104	7.9704	7.90761	7.39803	8.19948	7.66663	0.00015247	1.44307e-10	protein_coding	Nucleic acid-binding, OB-fold-like protein
AT3G19680	13.5968	12.5497	13.5066	13.5218	13.5696	11.607	13.1834	13.1809	0.70765	0.0234218	protein_coding	Protein of unknown function (DUF1005)
AT3G19920	4.77584	5.0089	6.67756	7.15633	5.02126	5.20442	5.52602	5.88205	3.85631e-05	1.12799e-07	protein_coding
AT3G20120	9.68388	9.70437	10.3833	10.518	10.043	10.1211	10.6027	10.6884	0.00580816	0.00096552	protein_coding	cytochrome P450, family 705, subfamily A, polypeptide 21
AT3G20160	8.48759	7.72569	9.34657	8.91126	8.16689	7.72565	8.56791	8.65038	0.0015495	3.42893e-07	protein_coding	Terpenoid synthases superfamily protein
AT3G20180	6.12051	5.92765	6.96258	6.51661	5.6825	5.62284	6.93742	6.48254	0.945529	0.000107849	protein_coding	Copper transport protein family
AT3G20210	5.57404	5.23154	9.71701	9.54049	5.45527	5.46816	7.1563	7.69577	2.88378e-05	6.12292e-09	protein_coding	delta vacuolar processing enzyme
AT3G20370	14.6546	14.3265	15.4577	14.8072	14.5724	14.3418	14.9775	14.5656	0.000204232	1.04093e-06	protein_coding	TRAF-like family protein
AT3G20460	6.42782	6.15669	7.71985	7.27185	7.27076	6.76084	7.81468	7.10386	0.785431	4.89732e-07	protein_coding	Major facilitator superfamily protein
AT3G20470	14.3346	14.0159	15.7094	15.5911	14.3272	14.5972	15.7406	15.5867	0.00575762	4.34351e-09	protein_coding	glycine-rich protein 5
AT3G20710	6.94378	6.69948	7.83586	7.58953	7.27859	7.20281	7.15351	7.01558	1.11772e-05	0.00103984	protein_coding	F-box family protein
AT3G20900	5.55801	5.47551	5.92639	5.82559	5.64917	5.00227	6.02755	5.52276	0.35888	0.0431494	protein_coding
AT3G21000	5.65862	5.32215	6.68498	6.09613	5.76798	5.56894	7.18783	6.7255	0.000574582	3.71556e-09	protein_coding	Gag-Pol-related retrotransposon family protein
AT3G21330	8.33808	7.57081	7.78213	7.95419	8.13826	6.5885	8.17319	7.60664	8.61062e-07	0.0304801	protein_coding	basic helix-loop-helix (bHLH) DNA-binding superfamily protein
AT3G21352	9.45494	8.66088	10.1721	9.92669	9.53781	9.00381	10.1458	9.70635	0.365925	3.0425e-10	protein_coding
AT3G21380	4.96873	4.92382	8.78412	9.79635	5.34758	5.47904	6.5607	7.08491	9.47306e-09	2.42557e-09	protein_coding	Mannose-binding lectin superfamily protein
AT3G21720	15.8281	15.5684	18.162	18.1993	16.1306	16.2108	18.2634	18.3925	0.000198334	8.49352e-06	protein_coding	isocitrate lyase
AT3G22460	7.55065	7.49092	8.00311	8.78348	7.81937	7.44589	8.28493	8.55618	0.188386	2.6748e-13	protein_coding	O-acetylserine (thiol) lyase (OAS-TL) isoform A2
AT3G22560	7.46206	8.03815	8.51999	9.21281	7.41247	7.9103	9.02473	9.59971	0.0658527	1.32758e-08	protein_coding	Acyl-CoA N-acyltransferases (NAT) superfamily protein
AT3G22570	10.4053	9.80979	11.1718	10.8418	10.3392	9.49976	10.269	9.91456	0.255416	0.00961424	protein_coding	Bifunctional inhibitor/lipid-transfer protein/seed storage 2S albumin superfamily protein
AT3G22968	10.3024	9.84029	11.1433	10.113	10.1591	9.83819	11.004	10.2844	0.000143889	5.14372e-10	protein_coding	conserved peptide upstream open reading frame 59
AT3G22970	10.3472	9.95305	11.1784	10.146	10.1931	9.8519	10.9764	10.2933	0.000159668	7.75067e-05	protein_coding	Protein of unknown function (DUF506)
AT3G23060	5.52503	5.10062	7.56808	7.29475	5.29232	5.24932	7.22203	6.97525	3.65819e-06	3.61892e-08	protein_coding	RING/U-box superfamily protein
AT3G23167	4.72897	4.85822	5.62452	5.1738	4.81998	4.89422	5.85025	5.63405	1.22881e-08	1.71921e-11	protein_coding	low-molecular-weight cysteine-rich 39
AT3G23170	11.8737	12.1301	13.2285	13.123	12.5435	11.9644	12.7013	13.2638	0.320423	4.24918e-09	protein_coding
AT3G23290	7.37106	7.23122	8.51658	7.52667	7.35969	7.1208	8.90289	7.97011	7.82467e-06	7.95677e-09	protein_coding	Protein of unknown function (DUF640)
AT3G23790	8.73367	8.41952	9.34559	8.95795	8.71299	8.25098	9.34167	8.93337	2.72781e-08	1.27128e-09	protein_coding	AMP-dependent synthetase and ligase family protein
AT3G23870	7.95854	7.66169	9.15593	9.10102	8.02856	7.85087	8.89378	8.67699	0.883376	0.00238112	protein_coding	Protein of unknown function (DUF803)
AT3G24020	11.5964	10.1991	11.8734	11.559	11.2235	10.6542	11.4808	11.1832	0.00245022	2.0233e-08	protein_coding	Disease resistance-responsive (dirigent-like protein) family protein
AT3G24340	6.19642	5.66729	6.86748	6.1998	5.70601	5.58792	6.51486	5.94104	0.0566702	1.18753e-05	protein_coding	chromatin remodeling 40
AT3G27770	8.49717	7.74302	8.4524	8.3018	8.27846	7.57851	8.67016	8.63631	0.000106221	1.09156e-06	protein_coding
AT3G28500	7.28498	6.6322	9.37257	8.97986	7.36139	6.6617	8.64542	7.94485	0.867325	9.17567e-05	protein_coding	60S acidic ribosomal protein family
AT3G28570	5.57957	5.31506	6.11787	5.95494	5.80308	5.62296	6.58541	6.20286	0.00199842	4.22369e-05	protein_coding	P-loop containing nucleoside triphosphate hydrolases superfamily protein
AT3G30775	11.7647	11.3586	12.3772	12.3341	11.8997	11.4669	12.2947	12.0267	1.87683e-05	3.74902e-05	protein_coding	Methylenetetrahydrofolate reductase family protein
AT3G43790	8.79147	8.42636	9.42513	9.06603	8.56451	8.17888	9.01596	8.47188	4.35097e-05	0.00401327	protein_coding	zinc induced facilitator-like 2
AT3G45700	8.93107	8.41266	9.64414	9.05349	9.03047	8.39297	9.31824	8.87821	0.000251314	5.18874e-05	protein_coding	Major facilitator superfamily protein
AT3G46700	7.43476	7.40113	8.64154	8.76604	7.50139	7.41932	8.23485	8.03568	2.70203e-12	0.000222662	protein_coding	UDP-Glycosyltransferase superfamily protein
AT3G47800	11.806	11.5565	12.5566	12.7295	11.6751	11.3309	12.4314	12.5664	4.63e-07	8.53204e-07	protein_coding	Galactose mutarotase-like superfamily protein
AT3G54990	9.59444	9.78087	10.6467	10.6974	9.36389	9.58041	10.5305	10.6374	1.21983e-10	0.0491572	protein_coding	Integrase-type DNA-binding superfamily protein
AT3G57520	9.40207	8.8639	9.66277	10.12	9.53	8.71589	9.53098	9.98002	0.132224	7.06879e-09	protein_coding	seed imbibition 2
AT3G57670	8.06662	7.79135	8.97339	8.17813	8.30034	8.20254	9.5054	8.70085	0.319605	2.26413e-12	protein_coding	C2H2-type zinc finger family protein
AT3G58480	5.21459	4.984	5.87976	5.50518	4.93291	4.69775	5.17534	4.96761	0.107255	0.000194784	protein_coding	calmodulin-binding family protein
AT3G59200	8.25648	7.40861	9.50346	8.4138	7.91057	7.26418	8.87988	7.90025	0.603945	0.0322117	protein_coding	F-box/RNI-like superfamily protein
AT3G59340	9.1737	8.25866	10.2295	9.10872	8.9713	8.14055	10.0087	8.98164	2.0223e-05	7.86651e-08	protein_coding	Eukaryotic protein of unknown function (DUF914)
AT3G60330	8.40445	7.9601	9.47065	9.56653	9.24778	8.99699	9.61201	9.05257	0.955197	1.4471e-05	protein_coding	H(+)-ATPase 7
AT3G61460	12.0321	11.8335	12.4351	12.3693	12.1042	11.5489	12.7542	12.4271	0.000725498	2.28597e-08	protein_coding	brassinosteroid-responsive RING-H2
AT3G61900	7.82136	7.57884	8.65034	8.85259	8.06936	7.72612	8.23774	8.78435	0.00042958	3.4353e-06	protein_coding	SAUR-like auxin-responsive protein family
AT3G61930	8.84287	8.17991	9.96765	9.77976	9.11095	8.29727	9.5655	9.31051	1.45197e-05	5.81747e-11	protein_coding
AT3G62570	9.15916	9.0338	9.28085	9.80339	9.0808	9.2537	9.49769	10.1093	0.000987316	3.45651e-09	protein_coding	Tetratricopeptide repeat (TPR)-like superfamily protein
AT3G62680	9.7171	9.00818	11.5784	11.2581	10.6641	10.1073	11.3302	10.4077	0.0983865	0.00012354	protein_coding	proline-rich protein 3
AT4G00250	6.79433	6.11637	7.76328	6.87936	6.48655	5.93161	7.66811	6.79914	7.73525e-05	0.0472337	protein_coding	DNA-binding storekeeper protein-related transcriptional regulator
AT4G01525	7.88337	7.38449	9.65322	9.33991	8.89758	8.56041	9.26972	8.83325	0.997482	5.90179e-06	transposable_element_gene	transposable element gene
AT4G01680	7.34473	6.82777	7.75666	7.63115	7.15998	6.9105	8.07825	7.61133	0.438787	0.0345332	protein_coding	myb domain protein 55
AT4G01700	12.2695	11.4899	13.1676	12.7222	12.2864	11.7455	12.7394	12.3178	0.603127	0.00489061	protein_coding	Chitinase family protein
AT4G02465	7.66326	6.81821	8.04618	7.40366	6.92497	6.33458	7.50605	6.7825	0.0101335	2.07883e-08	protein_coding
AT4G04460	9.24102	9.02876	10.5785	10.2272	9.22029	8.60846	10.2209	10.0824	1.61281e-06	4.62882e-07	protein_coding	Saposin-like aspartyl protease family protein
AT4G04653	6.0633	5.8496	6.6018	6.83712	6.79429	6.48734	6.95329	7.01927	0.0551586	0.0146433	pseudogene
AT4G04955	10.4772	9.39104	11.121	10.3681	10.3004	9.13329	10.8765	10.1582	9.36642e-10	0.00521215	protein_coding	allantoinase
AT4G06744	11.4656	11.2531	11.6869	12.2083	11.4345	10.9768	11.4887	11.6685	1.14086e-05	0.0429846	protein_coding	Leucine-rich repeat (LRR) family protein
AT4G08380	5.48295	5.32862	5.93121	6.3956	5.69	5.36577	5.88405	5.77656	9.53201e-07	0.0184971	protein_coding	Proline-rich extensin-like family protein
AT4G08410	8.83848	8.27403	9.93977	9.69828	9.25389	8.63045	9.64425	9.1068	0.508694	5.13236e-06	protein_coding	Proline-rich extensin-like family protein
AT4G08620	6.63529	6.17711	7.47199	7.36569	7.29017	6.87449	8.22029	7.63352	4.93129e-06	0.020393	protein_coding	sulphate transporter 1;1
AT4G10350	8.31896	8.53744	9.12172	9.47895	8.57283	8.80291	9.08595	9.4533	1.26095e-05	0.000108903	protein_coding	NAC domain containing protein 70
AT4G11642	5.44588	5.52224	5.75009	6.34748	6.24264	6.05919	6.57583	6.14515	2.16281e-10	4.95529e-07	pseudogene
AT4G11990	9.27487	9.37206	10.1419	10.1227	9.07254	9.06613	9.86748	9.83844	0.00027141	0.00614531	protein_coding	Cell cycle regulated microtubule associated protein
AT4G13030	7.82764	7.90529	8.87295	9.77129	7.94133	7.87893	8.69451	9.32045	0.00495136	0.00761146	protein_coding	P-loop containing nucleoside triphosphate hydrolases superfamily protein
AT4G13390	8.85502	8.00147	10.5517	10.1636	9.546	8.55354	10.097	9.34506	8.85371e-07	9.90269e-06	protein_coding	Proline-rich extensin-like family protein
AT4G13410	8.18511	7.38302	8.23132	8.26145	7.80265	6.99416	8.33423	8.46979	0.545894	0.00809418	protein_coding	Nucleotide-diphospho-sugar transferases superfamily protein
AT4G15417	6.79953	6.8331	8.15009	7.62985	6.84752	7.94903	7.5472	7.7107	0.949713	0.0489053	protein_coding	RNAse II-like 1
AT4G15670	9.55752	8.47465	8.73206	9.19607	9.43934	8.6553	8.44078	8.81551	0.288813	0.0085896	protein_coding	Thioredoxin superfamily protein
AT4G16240	11.2544	11.1215	12.4512	11.9413	11.294	11.0949	12.5204	11.8987	1.95387e-08	0.0106713	protein_coding
AT4G16500	14.4728	14.2143	15.424	15.357	14.6362	14.3761	15.3427	15.568	0.179059	7.60908e-05	protein_coding	Cystatin/monellin superfamily protein
AT4G16515	10.2751	9.98364	9.71112	9.86498	10.1887	9.44138	10.2968	10.6089	0.00300397	0.00940103	protein_coding
AT4G16770	10.696	10.3639	11.7211	11.6117	10.1458	9.89613	11.6233	11.4685	0.0104619	0.0360359	protein_coding	2-oxoglutarate (2OG) and Fe(II)-dependent oxygenase superfamily protein
AT4G16880	11.5945	11.5909	11.3474	10.942	11.2414	11.5156	11.9582	11.5513	0.0381201	0.00789046	protein_coding	Leucine-rich repeat (LRR) family protein
AT4G17695	8.31806	8.25751	9.28269	9.41964	8.32896	8.33436	9.60473	9.76093	0.0117778	5.54068e-05	protein_coding	Homeodomain-like superfamily protein
AT4G18940	8.50902	7.49756	9.43771	8.46869	7.99863	7.6191	8.44045	8.06278	8.25256e-11	2.52708e-08	protein_coding	RNA ligase/cyclic nucleotide phosphodiesterase family protein
AT4G18980	6.01775	5.85843	6.18251	6.92802	6.07152	6.08949	6.30645	6.75796	1.27243e-11	9.51142e-11	protein_coding	AtS40-3
AT4G20370	5.15726	5.05158	6.71322	6.18763	5.48448	5.09015	5.90383	5.16438	0.00396561	3.59385e-09	protein_coding	PEBP (phosphatidylethanolamine-binding protein) family protein
AT4G20820	9.7984	9.61878	10.7956	10.9625	10.3041	10.4276	10.7331	11.5255	0.469415	0.0166684	protein_coding	FAD-binding Berberine family protein
AT4G21326	8.3183	8.04672	8.92925	8.42808	8.00335	7.62003	8.89913	8.4209	0.00225235	2.23409e-07	protein_coding	subtilase 3.12
AT4G22080	7.05889	7.01421	7.80899	8.02998	7.51213	7.31415	7.8862	7.65149	0.00326635	0.0277667	protein_coding	root hair specific 14
AT4G22090	6.75173	6.54686	7.59068	7.84075	7.47932	7.18046	7.79984	7.62419	1.49906e-06	0.00144446	protein_coding	Pectin lyase-like superfamily protein
AT4G22230	8.93477	8.54844	10.3325	9.60622	9.21115	8.61088	9.83554	8.65508	1.17942e-08	3.75591e-05	protein_coding	Arabidopsis defensin-like protein
AT4G23070	6.11904	5.95164	6.4449	6.63415	6.11125	5.43929	6.15712	6.46427	5.80138e-07	0.000780122	protein_coding	RHOMBOID-like protein 7
AT4G23670	15.1597	15.3144	16.2497	16.2341	15.0077	15.1046	15.8567	16.1883	5.76037e-05	0.00428977	protein_coding	Polyketide cyclase/dehydrase and lipid transport superfamily protein
AT4G24110	10.0507	9.64848	11.6585	10.365	10.3315	9.49827	10.6418	10.7347	0.255522	7.49368e-07	protein_coding
AT4G25790	8.58937	7.94136	9.91198	10.0513	9.48122	9.41464	10.1273	9.87644	0.449223	7.122e-06	protein_coding	CAP (Cysteine-rich secretory proteins, Antigen 5, and Pathogenesis-related 1 protein) superfamily protein
AT4G25830	10.4091	9.98806	10.9942	11.0621	10.5638	10.1122	11.1455	11.0649	2.54144e-07	1.84527e-08	protein_coding	Uncharacterised protein family (UPF0497)
AT4G26490	7.41972	7.03752	7.92266	7.40997	7.31317	6.8044	7.67238	7.13032	0.560918	9.77894e-07	protein_coding	Late embryogenesis abundant (LEA) hydroxyproline-rich glycoprotein family
AT4G27150	4.9822	4.88936	8.91645	9.80461	5.72457	5.69886	8.6856	9.79723	0.398543	0.00954678	protein_coding	seed storage albumin 2
AT4G27450	11.1504	11.0953	13.3102	13.1549	11.8274	11.1596	12.9245	13.5575	3.81129e-05	0.0221247	protein_coding	Aluminium induced protein with YGL and LRDR motifs
AT4G27480	7.82425	6.81267	8.35252	8.20657	7.51703	6.88119	8.14657	8.06784	0.000268886	3.66261e-05	protein_coding	Core-2/I-branching beta-1,6-N-acetylglucosaminyltransferase family protein
AT4G29850	9.29712	9.46205	9.96863	10.3033	9.76086	9.70278	9.99259	10.3599	0.59894	1.66822e-06	protein_coding	Eukaryotic protein of unknown function (DUF872)
AT4G30290	11.6009	11.3939	12.2594	11.9784	11.4935	12.0545	12.3944	12.1243	2.50522e-07	0.0341674	protein_coding	xyloglucan endotransglucosylase/hydrolase 19
AT4G32460	12.706	12.551	13.334	13.216	12.7878	12.6596	13.6587	13.6534	0.0554069	7.11054e-09	protein_coding	Protein of unknown function, DUF642
AT4G32870	11.1178	10.9417	11.6505	12.2603	11.2616	11.1132	11.5001	11.9619	0.17861	0.00133345	protein_coding	Polyketide cyclase/dehydrase and lipid transport superfamily protein
AT4G33070	9.92901	9.17414	11.2691	10.3396	10.3563	8.94869	10.1251	10.3351	1.52015e-06	6.00441e-10	protein_coding	Thiamine pyrophosphate dependent pyruvate decarboxylase family protein
AT4G33280	7.03684	6.33295	7.34976	6.82668	6.60461	6.04936	7.18916	6.59348	0.0108593	0.00323025	protein_coding	AP2/B3-like transcriptional factor family protein
AT4G34250	10.3152	10.7123	11.4258	12.6372	10.0581	10.1916	11.5827	12.7758	2.61733e-06	0.0217834	protein_coding	3-ketoacyl-CoA synthase 16
AT4G37530	8.22823	7.9096	8.78292	9.07958	8.5022	8.00236	8.52956	8.36454	0.0755327	9.43967e-05	protein_coding	Peroxidase superfamily protein
AT4G37870	10.5845	10.5288	11.662	11.6344	11.1939	11.1588	11.7944	11.7551	0.237962	0.0222937	protein_coding	phosphoenolpyruvate carboxykinase 1
AT4G38370	11.8554	11.7088	12.357	12.0028	11.5942	11.2645	11.9029	11.627	0.0223268	5.29608e-10	protein_coding	Phosphoglycerate mutase family protein
AT4G38400	10.1442	10.0757	9.72657	10.8085	10.2522	9.62568	10.0519	10.5286	0.00609871	7.76409e-05	protein_coding	expansin-like A2
AT4G39500	7.84491	7.20259	9.45842	9.3005	8.72915	8.23755	9.91398	9.64976	0.0612194	4.77378e-05	protein_coding	cytochrome P450, family 96, subfamily A, polypeptide 11
AT5G01660	8.38626	8.27015	9.16852	8.75736	8.05784	7.84793	9.01518	8.49744	5.34204e-08	5.60446e-05	protein_coding
AT5G02030	10.073	10.4295	11.1284	11.2396	10.1179	10.6474	11.5431	11.9072	0.0107986	0.0137639	protein_coding	POX (plant homeobox) family protein
AT5G02420	8.6077	7.95664	9.16518	9.26014	8.8488	8.35116	9.20756	8.90956	6.39646e-07	0.000213413	protein_coding
AT5G02890	11.7511	10.8607	12.546	11.6874	11.4672	10.3576	12.287	11.3796	0.0332561	5.54209e-05	protein_coding	HXXXD-type acyl-transferase family protein
AT5G04960	10.1611	9.31713	11.562	11.2423	11.1511	10.2939	11.4913	10.76	2.3104e-06	0.00144692	protein_coding	Plant invertase/pectin methylesterase inhibitor superfamily
AT5G05290	5.26956	5.39032	9.54474	8.35571	5.29191	5.29007	6.0565	7.07488	0.73892	0.00263782	protein_coding	expansin A2
AT5G06200	9.07527	8.03166	9.62607	10.0049	8.76949	8.69089	9.35158	9.62738	0.0871297	2.9627e-08	protein_coding	Uncharacterised protein family (UPF0497)
AT5G06250	6.03632	6.34032	7.28604	7.39855	6.2246	6.49253	6.96718	7.48611	4.9024e-10	0.00275259	protein_coding	AP2/B3-like transcriptional factor family protein
AT5G06480	7.30431	6.98815	7.92899	7.68193	6.83223	6.5035	7.42691	7.09248	0.000253122	0.0203528	protein_coding	Immunoglobulin E-set superfamily protein
AT5G06570	8.93117	8.70048	9.12413	9.73369	9.11268	8.4748	9.33139	9.71379	0.00138097	0.000592736	protein_coding	alpha/beta-Hydrolases superfamily protein
AT5G06630	9.40329	8.66709	11.0637	11.0573	10.2802	9.72839	10.8705	10.3055	0.001433	8.3624e-06	protein_coding	proline-rich extensin-like family protein
AT5G07060	6.84197	6.56863	7.65041	7.0751	6.97617	6.54146	7.95029	7.27378	2.64853e-07	2.04849e-08	protein_coding	CCCH-type zinc fingerfamily protein with RNA-binding domain
AT5G07100	7.50841	7.72532	8.40378	8.678	7.46703	7.46123	8.38252	8.45408	0.276847	0.0132099	protein_coding	WRKY DNA-binding protein 26
AT5G07200	7.22429	7.07106	8.0161	8.35987	7.78085	7.61996	8.27875	8.86859	1.0168e-05	0.0069244	protein_coding	gibberellin 20-oxidase 3
AT5G07440	13.3016	13.3956	14.1197	14.4765	13.3228	13.185	13.9266	14.397	0.00312322	3.74902e-07	protein_coding	glutamate dehydrogenase 2
AT5G07770	8.54227	7.83056	9.28664	8.66992	8.3927	7.91256	9.27194	8.40774	2.42336e-07	0.00218422	protein_coding	Actin-binding FH2 protein
AT5G07780	6.25928	6.03532	7.10371	7.04	6.41316	6.45617	6.78954	6.82778	0.000374921	4.95354e-07	protein_coding	Actin-binding FH2 (formin homology 2) family protein
AT5G07880	6.21432	5.94202	6.98776	6.64973	5.89953	5.67263	6.27416	6.24396	6.09404e-07	2.14872e-07	protein_coding	synaptosomal-associated protein SNAP25-like 29
AT5G08150	9.68727	7.63792	8.81292	9.10893	8.77111	6.28178	8.53627	8.89313	0.819882	0.00016262	protein_coding	suppressor of phytochrome b 5
AT5G08185	10.314	9.82412	10.832	10.3889	10.2007	9.74448	10.8142	10.4113	0.743936	3.88481e-05	protein_coding	microRNA162A
AT5G08260	13.5311	13.5372	14.5848	14.5037	13.8021	13.6382	14.4773	14.3499	8.44154e-12	4.32521e-05	protein_coding	serine carboxypeptidase-like 35
AT5G08350	9.1241	8.59547	9.92662	9.43228	9.31034	8.71266	9.95678	9.42985	4.73815e-06	0.000293294	protein_coding	GRAM domain-containing protein / ABA-responsive protein-related
AT5G08360	9.92219	9.77654	10.3033	10.0558	9.04275	8.80189	10.0622	9.8306	0.709692	0.000518694	protein_coding	Protein of unknown function (DUF789)
AT5G09300	11.2408	10.5957	11.9881	11.5874	10.9765	10.6664	11.7522	11.3302	0.0152679	6.42822e-08	protein_coding	Thiamin diphosphate-binding fold (THDP-binding) superfamily protein
AT5G09540	7.69584	7.6279	8.24474	8.14502	7.91922	7.91206	8.60016	8.63391	0.827321	1.23445e-07	protein_coding	Chaperone DnaJ-domain superfamily protein
AT5G09700	6.66743	6.5695	7.02796	6.80614	5.93458	6.27335	6.93786	6.61746	1.36586e-06	9.96231e-06	protein_coding	Glycosyl hydrolase family protein
AT5G10120	6.14127	6.26809	8.21767	8.88741	5.95163	5.87293	6.67793	7.07449	0.539683	0.0318155	protein_coding	Ethylene insensitive 3 family protein
AT5G10190	9.76407	9.86741	10.3052	10.6942	9.68993	9.79515	10.3494	10.6301	0.00550251	2.95328e-06	protein_coding	Major facilitator superfamily protein
AT5G10310	7.61827	7.55237	8.39437	8.25865	7.22022	7.14268	8.24805	8.42004	1.0397e-09	1.63039e-09	protein_coding
AT5G10600	9.23247	8.78547	9.79045	9.37648	9.24525	8.64577	9.4912	9.07595	0.536254	9.31495e-06	protein_coding	cytochrome P450, family 81, subfamily K, polypeptide 2
AT5G11100	8.02902	7.78862	8.67158	8.67859	7.84391	7.63882	8.53512	8.28849	0.00264393	2.55376e-08	protein_coding	Calcium-dependent lipid-binding (CaLB domain) family protein
AT5G11300	9.95547	9.87574	10.4512	10.2407	9.5637	9.36861	9.90311	9.78954	8.00458e-05	5.82934e-06	protein_coding	mitotic-like cyclin 3B from Arabidopsis
AT5G11412	5.12948	4.92851	6.35892	5.89215	4.83526	4.68573	6.61958	6.08876	0.000396675	1.98913e-07	protein_coding	RNA-binding (RRM/RBD/RNP motifs) family protein
AT5G14180	5.95637	6.41354	7.40081	8.82707	6.36149	6.47984	6.94583	8.7027	1.94465e-06	1.93225e-07	protein_coding	Myzus persicae-induced lipase 1
AT5G14450	11.0079	10.6392	11.7741	10.9479	11.0151	10.5509	11.3528	10.6931	1.14708e-07	3.61761e-08	protein_coding	GDSL-like Lipase/Acylhydrolase superfamily protein
AT5G15780	9.29803	8.92384	9.75868	9.64587	8.21081	8.38587	9.60874	9.80458	7.18218e-08	0.00188819	protein_coding	Pollen Ole e 1 allergen and extensin family protein
AT5G15890	8.33518	7.38287	8.78692	8.73034	8.44728	8.21321	8.85833	8.79723	0.269354	9.36348e-06	protein_coding	TRICHOME BIREFRINGENCE-LIKE 21
AT5G16080	8.09083	7.65844	9.48193	9.71194	8.63054	7.90741	10.5655	10.1178	0.458049	7.50373e-08	protein_coding	carboxyesterase 17
AT5G17090	4.99	4.96902	6.15047	6.12398	5.25944	5.04208	5.56277	5.79189	0.000133171	0.000197813	protein_coding	Cystatin/monellin superfamily protein
AT5G17820	13.7654	12.9171	14.5403	14.0704	13.8836	13.1725	14.1293	13.6101	0.00184833	7.35421e-07	protein_coding	Peroxidase superfamily protein
AT5G18170	11.1948	11.225	11.96	12.0796	11.0547	10.8652	11.9623	11.9706	0.27142	5.50007e-11	protein_coding	glutamate dehydrogenase 1
AT5G18670	11.2151	10.8378	11.9138	12.0993	11.5102	11.0821	12.1031	12.4092	8.72967e-09	0.000136152	protein_coding	beta-amylase 3
AT5G18780	9.0073	8.74848	9.47565	9.78337	9.16251	9.10449	9.44567	9.7362	0.0135171	3.76239e-05	protein_coding	F-box/RNI-like superfamily protein
AT5G19490	7.01653	6.53263	7.67842	7.15851	6.67827	6.15506	7.39448	6.77496	0.0223497	0.000853268	protein_coding	Histone superfamily protein
AT5G19560	6.48674	6.16705	7.23548	6.94562	6.90707	6.80795	7.21125	6.86451	0.57885	0.000109192	protein_coding	ROP uanine nucleotide exchange factor 10
AT5G19700	5.20673	5.13672	6.35976	5.51162	5.0417	4.86061	6.10174	5.60386	0.983269	0.00522535	protein_coding	MATE efflux family protein
AT5G20045	6.8189	6.17367	7.62715	7.76336	6.66271	6.3624	7.5692	7.66881	0.824643	3.76633e-08	protein_coding
AT5G21120	6.23713	6.41284	7.33642	7.26042	6.3193	6.64202	7.08845	6.97681	0.000228761	0.000166292	protein_coding	ETHYLENE-INSENSITIVE3-like 2
AT5G21150	7.40145	7.0304	9.67304	9.23164	6.87663	6.87942	9.61828	9.08632	0.503461	0.000848218	protein_coding	Argonaute family protein
AT5G22300	8.64527	8.90623	8.14098	8.64854	8.26654	7.74435	8.2238	9.06431	4.92087e-08	4.856e-09	protein_coding	nitrilase 4
AT5G23220	11.1781	10.7678	12.3761	12.2221	11.3765	10.8136	11.9275	11.48	0.192042	5.52306e-06	protein_coding	nicotinamidase 3
AT5G23230	8.40919	8.53904	9.38685	9.64714	8.60448	8.79814	9.58847	9.73867	3.36898e-08	9.20435e-05	protein_coding	nicotinamidase 2
AT5G23640	9.22377	9.12695	9.96992	10.3174	9.46091	8.95097	10.2575	10.3867	2.62582e-06	0.00697435	protein_coding
AT5G23780	8.13933	7.73039	8.80584	8.22196	7.7472	7.23662	8.30756	7.78348	0.0054897	2.49766e-08	protein_coding	DOMAIN OF UNKNOWN FUNCTION 724 9
AT5G24130	4.84727	4.90881	6.89592	6.78287	5.24616	4.98889	6.257	5.78355	0.684445	0.00687373	protein_coding
AT5G24280	7.68943	7.83816	8.89363	9.0408	7.65382	7.59118	8.85938	9.29436	0.363405	7.87914e-06	protein_coding	gamma-irradiation and mitomycin c induced 1
AT5G24313	6.92885	6.13943	7.93425	7.84015	7.61649	7.01103	7.86758	7.35562	1.41829e-07	3.29302e-05	protein_coding
AT5G25140	9.64272	9.21384	9.96566	10.8725	9.65576	9.25007	10.3454	10.6716	0.000709633	9.78221e-06	protein_coding	cytochrome P450, family 71, subfamily B, polypeptide 13
AT5G25900	11.5764	11.4689	12.9776	13.0532	11.2919	11.1962	12.6775	12.5137	4.15884e-06	5.28508e-07	protein_coding	GA requiring 3
AT5G28520	7.33238	6.77814	8.64823	8.5414	7.67877	7.64679	9.25107	8.9444	0.000142513	0.000370252	protein_coding	Mannose-binding lectin superfamily protein
AT5G28996	6.41321	6.33416	7.38622	7.53452	7.1295	6.75859	7.76916	8.04522	0.0015098	6.11807e-05	pseudogene
AT5G33290	10.4594	10.1804	11.2206	11.3047	10.5932	10.564	10.9238	11.2533	0.00195357	3.73315e-06	protein_coding	xylogalacturonan deficient 1
AT5G35660	5.1706	4.96709	8.61368	8.75499	5.34381	5.64506	6.54065	5.91482	0.419082	0.0246343	protein_coding	Glycine-rich protein family
AT5G36150	6.03897	6.02435	7.14411	6.2202	5.66029	5.51299	6.24879	5.81567	0.00466261	0.0004777	protein_coding	putative pentacyclic triterpene synthase 3
AT5G36180	8.91548	8.0234	9.71123	8.71898	8.70886	7.595	9.16195	8.02599	0.935179	6.77172e-09	protein_coding	serine carboxypeptidase-like 1
AT5G36910	10.0787	9.73922	11.4361	11.2819	9.85515	9.42616	10.1543	10.4186	0.365477	0.0320345	protein_coding	thionin 2.2
AT5G37600	14.3897	14.0872	14.9498	14.6338	14.2564	13.7976	14.5424	14.256	0.0334241	6.70775e-05	protein_coding	glutamine synthase clone R1
AT5G38020	9.90916	9.22279	11.6254	10.5467	10.2097	9.43555	11.0026	9.91862	1.79512e-05	1.00643e-05	protein_coding	S-adenosyl-L-methionine-dependent methyltransferases superfamily protein
AT5G38390	6.29931	5.9587	6.32845	6.43059	6.00653	5.66352	6.79891	6.43786	0.114647	4.11544e-08	protein_coding	F-box/RNI-like superfamily protein
AT5G38540	9.55559	9.76365	10.5635	10.7882	10.146	10.317	11.0792	11.148	0.305567	0.00936399	protein_coding	Mannose-binding lectin superfamily protein
AT5G39720	10.3129	9.99306	10.751	10.7774	10.8205	10.5376	11.0785	11.0757	0.294272	1.95223e-08	protein_coding	avirulence induced gene 2 like protein
AT5G40210	7.18853	7.51559	8.20104	8.64351	7.33303	7.4688	7.96037	8.78353	1.73432e-06	3.08756e-08	protein_coding	nodulin MtN21 /EamA-like transporter family protein
AT5G40240	9.95266	9.53693	10.5503	10.3673	9.85593	9.53609	10.2384	9.91893	0.0492494	3.3887e-05	protein_coding	nodulin MtN21 /EamA-like transporter family protein
AT5G40420	5.11856	5.2985	8.79855	10.3682	6.59638	7.0446	8.45743	8.84727	1.01857e-08	8.14532e-10	protein_coding	oleosin 2
AT5G40730	13.6629	13.0409	14.7015	14.3927	13.6	13.0075	14.1844	13.7228	5.17267e-08	6.92682e-05	protein_coding	arabinogalactan protein 24
AT5G41120	8.02937	7.91807	8.61273	8.71122	7.95567	7.67318	8.42965	8.40905	7.8178e-07	2.60761e-06	protein_coding	Esterase/lipase/thioesterase family protein
AT5G41400	10.5947	10.7551	11.6776	12.0016	10.5319	10.8594	11.961	11.9634	0.496874	0.00340838	protein_coding	RING/U-box superfamily protein
AT5G42180	12.4011	11.288	12.5885	12.1619	12.1561	11.7515	12.4993	12.1472	0.925124	3.61017e-06	protein_coding	Peroxidase superfamily protein
AT5G42250	10.3607	9.84144	11.1441	10.8898	10.253	9.64645	10.9156	10.4644	1.24853e-06	3.09722e-05	protein_coding	Zinc-binding alcohol dehydrogenase family protein
AT5G42370	6.39566	6.23178	6.9086	6.60045	5.92116	5.8249	6.93845	5.90744	5.53062e-07	0.00122009	protein_coding	Calcineurin-like metallo-phosphoesterase superfamily protein
AT5G42760	9.46687	9.61889	9.89451	10.1271	9.29844	9.48218	10.0441	10.3224	0.921752	2.43081e-07	protein_coding	Leucine carboxyl methyltransferase
AT5G43060	13.7365	13.1698	14.3791	13.9819	13.5887	13.2787	14.195	13.7195	0.7268	0.0273365	protein_coding	Granulin repeat cysteine protease family protein
AT5G43230	6.42002	5.81472	6.95176	6.77568	6.76689	6.40469	7.09773	6.6888	6.465e-06	4.30793e-06	protein_coding
AT5G43590	5.6969	5.23589	6.34092	5.91815	5.40088	5.25736	5.79764	5.64972	0.0494124	0.000188567	protein_coding	Acyl transferase/acyl hydrolase/lysophospholipase superfamily protein
AT5G44210	9.65838	9.88534	10.6541	10.6464	10.3668	10.4129	11.1672	10.9897	0.315874	2.42318e-05	protein_coding	erf domain protein 9
AT5G44260	7.70208	7.51663	9.55604	9.87175	7.58376	7.15191	9.61936	10.3364	3.21589e-06	1.63252e-07	protein_coding	Zinc finger C-x8-C-x5-C-x3-H type family protein
AT5G44380	12.7231	12.5351	13.624	13.5831	12.4246	12.3682	13.0395	13.2191	4.35457e-08	4.02535e-08	protein_coding	FAD-binding Berberine family protein
AT5G44440	8.22202	7.4927	9.34684	8.48159	7.39432	6.49814	8.31279	8.51015	4.70751e-10	0.000411931	protein_coding	FAD-binding Berberine family protein
AT5G44700	7.14704	6.72126	8.14285	8.07151	6.99717	6.80442	7.95921	7.81482	0.668147	0.0284734	protein_coding	Leucine-rich repeat transmembrane protein kinase
AT5G45380	8.39702	7.91798	9.6303	9.30542	9.1964	8.93325	9.53277	9.20993	0.0221688	3.038e-06	protein_coding	solute:sodium symporters;urea transmembrane transporters
AT5G47550	13.7085	12.758	14.0293	13.5832	12.8059	11.6138	13.473	12.8073	1.94991e-07	0.000566876	protein_coding	Cystatin/monellin superfamily protein
AT5G48000	11.4155	10.2874	13.0214	12.401	10.2248	9.19711	10.5623	9.79911	1.67646e-06	4.6812e-06	protein_coding	cytochrome P450, family 708, subfamily A, polypeptide 2
AT5G48890	4.84085	5.07929	6.19504	5.67575	4.96862	5.13471	5.5991	5.32096	0.0890025	3.83785e-06	protein_coding	C2H2-like zinc finger protein
AT5G50335	11.1543	10.5066	11.2805	11.1031	11.998	11.0173	12.9911	12.0936	0.107875	0.00122958	protein_coding
AT5G50915	9.28712	9.08496	9.16791	9.43401	9.25828	8.39089	9.12592	9.30495	0.00775771	1.2394e-06	protein_coding	basic helix-loop-helix (bHLH) DNA-binding superfamily protein
AT5G51500	7.05105	6.50039	7.60704	7.82348	7.22522	7.0014	7.54195	8.04303	9.47754e-09	3.61913e-05	protein_coding	Plant invertase/pectin methylesterase inhibitor superfamily
AT5G51520	9.28825	9.17929	9.6433	10.9561	9.58584	9.7172	9.94802	10.9043	0.844524	0.00682269	protein_coding	Plant invertase/pectin methylesterase inhibitor superfamily protein
AT5G51750	12.4548	12.4401	13.2292	12.9505	12.0494	12.0519	12.5049	12.527	0.000191203	2.04435e-09	protein_coding	subtilase 1.3
AT5G52250	10.5936	9.61821	10.707	10.4265	10.1031	9.28294	10.8008	10.3268	0.619158	5.22239e-05	protein_coding	Transducin/WD40 repeat-like superfamily protein
AT5G52330	7.57828	6.78541	8.47354	8.31265	6.38024	5.60607	6.51732	6.31968	0.000196082	3.36051e-05	protein_coding	TRAF-like superfamily protein
AT5G52900	7.52912	7.71633	6.60517	7.42379	7.21467	6.53528	7.31359	7.5528	6.7536e-05	0.00766114	protein_coding
[truncated: 55 more rows]

## Sheet: S8
Supplemental Table S8. Genes classified into Group 6 in Figure 1C
[truncated: 598 more rows]

[truncated: 8 more sheets: S9, S10, S11, S12, S13, S14, S15, S16]
